# Supplementary material for: KDM5C and KDM5D influence DNA methylation in adult mouse liver
Source: Biol Sex Differ. 2026 Feb 12;17:55. doi: 10.1186/s13293-026-00844-6 (PMC13011546; doi:10.1186/s13293-026-00844-6)
Supplement: Supplementary file 2 — Supplementary Material 2. [file 13293_2026_844_MOESM2_ESM.xlsx]

## Sheet: C+- vs C++ DMRs
chr	start	end	length	nCG	C+/- methylation	C+/+ methylation	methylation difference	areaStat
chr1	184959055	184959563	509	3	0.911022	0.769717	0.141305	6.66328
chr2	118727550	118727676	127	3	0.911417	0.750661	0.160755	6.16612
chr2	167826740	167826886	147	3	0.95824	0.787123	0.171117	7.44631
chr3	5561195	5561358	164	3	0.862577	0.683455	0.179122	6.59786
chr3	152107958	152108024	67	3	0.899706	0.739743	0.159963	6.35997
chr4	12628554	12628617	64	3	0.8944	0.741133	0.153267	6.51716
chr4	148271842	148271892	51	3	0.204909	0.0306676	0.174242	6.11973
chr5	101558368	101558479	112	3	0.179425	0.40771	-0.228285	-7.89137
chr5	114766443	114766508	66	5	0.98493	0.88058	0.10435	10.1525
chr5	119661644	119661694	51	3	0.299782	0.119474	0.180308	6.33163
chr5	143758412	143758557	146	4	0.291079	0.134791	0.156288	7.23845
chr6	35258692	35258743	52	4	0.941655	0.775965	0.16569	9.31783
chr7	35269335	35269388	54	3	0.0210727	0.151081	-0.130008	-6.95296
chr7	46677082	46677148	67	3	0.246947	0.0618813	0.185066	7.30897
chr7	78379566	78379778	213	3	0.968675	0.853677	0.114998	6.20708
chr7	126625311	126625542	232	3	0.682148	0.534097	0.148051	6.74616
chr8	13162243	13162316	74	4	0.0927097	0.270868	-0.178158	-9.17221
chr8	71405491	71405574	84	5	0.051422	0.20711	-0.155688	-11.2661
chr8	111061968	111062018	51	3	0.227323	0.0651207	0.162202	6.15673
chr9	21244932	21245144	213	4	0.346699	0.115808	0.230891	9.41963
chr9	118689278	118689442	165	3	0.930203	0.745493	0.18471	6.94589
chr11	20635339	20636063	725	3	0.559482	0.38515	0.174332	6.51846
chr13	99327882	99328002	121	3	0.941406	0.811841	0.129565	6.05168
chr14	46881888	46882002	115	3	0.0380832	0.219314	-0.181231	-7.57471
chr14	48157884	48158262	379	3	0.980939	0.863829	0.11711	6.45135
chr15	72865588	72865649	62	3	0.947307	0.713864	0.233442	9.43406
chr15	96958368	96958439	72	3	0.365847	0.708752	-0.342905	-10.2163
chr15	102673273	102673368	96	5	0.638951	0.86295	-0.223998	-13.4942
chr16	31002500	31002612	113	3	0.988605	0.874672	0.113933	6.37952
chr16	94533996	94534118	123	3	0.972595	0.839737	0.132858	6.27018
chr17	29064414	29064474	61	3	0.99596	0.871833	0.124127	6.57255
chr17	86437508	86437606	99	3	0.37507	0.126678	0.248392	8.3921
chr18	53461622	53461675	54	3	0.0604635	0.217188	-0.156724	-6.8594
chr19	9455105	9455264	160	3	0.793038	0.952168	-0.159131	-6.59273
chr19	45296431	45296572	142	3	0.889186	0.657815	0.231371	8.59338

## Sheet: C+- vs C++ DMCs
chr	position	C+/- methylation	C+/+ methylation	methylation difference	diff.se	stat	p-value
chr1	78081924-78081925	0.0467751	0.343439	-0.296664	0.0757833	-3.91464	9.05402e-05
chr1	66677945-66677946	0.954197	0.65028	0.303917	0.082374	3.68948	0.000224712
chr1	43688993-43688994	0.592093	0.91026	-0.318168	0.0887275	-3.5859	0.00033592
chr1	125677373-125677374	0.0348193	0.303373	-0.268554	0.069234	-3.87893	0.000104915
chr1	183367979-183367980	0.0470638	0.319628	-0.272565	0.0718452	-3.79378	0.000148373
chr1	78081936-78081937	0.113793	0.426465	-0.312672	0.088906	-3.51688	0.000436646
chr1	56507170-56507171	0.727608	0.385323	0.342285	0.101478	3.37299	0.000743567
chr1	155492481-155492482	0.965626	0.630177	0.335449	0.100755	3.32934	0.000870509
chr1	125079027-125079028	0.975591	0.72193	0.253661	0.0672278	3.77315	0.000161199
chr1	88328432-88328433	0.826756	0.472431	0.354325	0.111943	3.16523	0.00154962
chr1	90232151-90232152	0.868499	0.569175	0.299324	0.0906784	3.30094	0.000963598
chr1	163254088-163254089	0.873406	0.57383	0.299576	0.0919766	3.25709	0.00112561
chr1	181881300-181881301	0.968668	0.707227	0.261441	0.0768628	3.4014	0.000670421
chr1	188644795-188644796	0.964673	0.722383	0.24229	0.0689938	3.51177	0.000445131
chr1	101568999-101569000	0.665442	0.916362	-0.25092	0.0736623	-3.40636	0.000658363
chr1	38176159-38176160	0.860836	0.55898	0.301856	0.0990506	3.0475	0.00230755
chr1	77147606-77147607	0.720622	0.393941	0.326681	0.112151	2.91286	0.00358138
chr1	182302164-182302165	0.66683	0.954955	-0.288124	0.0930875	-3.0952	0.00196679
chr1	157724293-157724294	0.253632	0.552834	-0.299202	0.0992773	-3.0138	0.00257996
chr1	161375739-161375740	0.928328	0.676104	0.252224	0.0765864	3.29332	0.000990114
chr1	77975467-77975468	0.497495	0.207368	0.290127	0.0975187	2.97509	0.00292904
chr1	61018960-61018961	0.584408	0.852189	-0.267781	0.0861396	-3.10868	0.00187924
chr1	154725958-154725959	0.0625806	0.343268	-0.280687	0.093211	-3.01131	0.0026012
chr1	22134081-22134082	0.634431	0.925698	-0.291266	0.098682	-2.95156	0.00316168
chr1	163187541-163187542	0.872476	0.614551	0.257925	0.0817692	3.15431	0.0016088
chr1	59270243-59270244	0.983969	0.759182	0.224787	0.0650144	3.4575	0.000545214
chr1	73383823-73383824	0.797395	0.526094	0.271301	0.0897592	3.02254	0.00250663
chr1	160978969-160978970	0.70816	0.962709	-0.254549	0.0810577	-3.14034	0.00168753
chr1	166908680-166908681	0.473726	0.19171	0.282015	0.0956082	2.9497	0.00318085
chr1	59686802-59686803	0.283252	0.55915	-0.275898	0.0924217	-2.98521	0.00283384
chr1	176652270-176652271	0.736985	0.439567	0.297417	0.103845	2.86406	0.00418252
chr1	111435003-111435004	0.353061	0.643996	-0.290934	0.100637	-2.89092	0.00384119
chr1	74609543-74609544	0.679779	0.938661	-0.258882	0.0843594	-3.0688	0.00214923
chr1	38393481-38393482	0.835623	0.577241	0.258382	0.0843421	3.0635	0.00218768
chr1	5045443-5045444	0.893191	0.634056	0.259135	0.0847462	3.05778	0.00222981
chr1	70692495-70692496	0.6069	0.308154	0.298746	0.105967	2.81923	0.00481386
chr1	74103574-74103575	0.971111	0.724833	0.246278	0.0783122	3.14482	0.00166187
chr1	86311643-86311644	0.821697	0.541948	0.279749	0.0965068	2.89875	0.00374651
chr1	90855135-90855136	0.934708	0.691459	0.243248	0.0770945	3.1552	0.00160391
chr1	21830569-21830570	0.920501	0.67493	0.245571	0.0785445	3.12652	0.00176891
chr1	144842379-144842380	0.905482	0.649147	0.256335	0.0844302	3.03605	0.00239697
chr1	61902105-61902106	0.779371	0.475567	0.303804	0.111121	2.73399	0.00625722
chr1	41266279-41266280	0.818869	0.557167	0.261702	0.0882401	2.9658	0.00301897
chr1	68115939-68115940	0.813308	0.529602	0.283706	0.100283	2.82905	0.00466857
chr1	83122840-83122841	0.904895	0.66344	0.241455	0.0775245	3.11456	0.00184217
chr1	13056078-13056079	0.915762	0.681685	0.234077	0.0736884	3.17658	0.00149023
chr1	147972753-147972754	0.938076	0.718808	0.219267	0.0656044	3.34227	0.000830969
chr1	91187786-91187787	0.863712	0.611812	0.2519	0.083913	3.00192	0.00268281
chr1	119918525-119918526	0.93881	0.703741	0.235069	0.0746527	3.14883	0.00163925
chr1	136887548-136887549	0.831049	0.563249	0.2678	0.0931767	2.87411	0.00405166
chr1	92348873-92348874	0.60199	0.874753	-0.272763	0.0959776	-2.84194	0.00448393
chr1	167016617-167016618	0.846494	0.576681	0.269813	0.0947263	2.84834	0.00439474
chr1	63385983-63385984	0.925402	0.685662	0.23974	0.0781016	3.0696	0.00214349
chr1	161966875-161966876	0.70668	0.429057	0.277623	0.100588	2.75999	0.00578039
chr1	133204719-133204720	0.926544	0.686667	0.239877	0.0796656	3.01105	0.0026035
chr1	171917971-171917972	0.787605	0.508697	0.278908	0.102384	2.72414	0.00644688
chr1	5072153-5072154	0.773955	0.997144	-0.22319	0.0706904	-3.15728	0.00159248
chr1	63929839-63929840	0.817185	0.506971	0.310214	0.121135	2.56089	0.0104406
chr1	157726342-157726343	0.952943	0.717729	0.235214	0.0780452	3.01382	0.00257983
chr1	105843014-105843015	0.892154	0.65182	0.240334	0.0815291	2.94783	0.00320013
chr1	164445775-164445776	0.627564	0.879613	-0.252049	0.088351	-2.85281	0.00433342
chr1	77778589-77778590	0.447274	0.740289	-0.293015	0.112439	-2.60598	0.00916114
chr1	84853656-84853657	0.969862	0.747615	0.222247	0.0711861	3.12206	0.00179591
chr1	125172013-125172014	0.632794	0.354091	0.278704	0.104259	2.67319	0.00751346
chr1	63191337-63191338	0.960138	0.750369	0.20977	0.0640392	3.27564	0.00105421
chr1	185104904-185104905	0.855905	0.594879	0.261025	0.0941652	2.77199	0.00557145
chr1	146457040-146457041	0.742597	0.479465	0.263132	0.0958029	2.7466	0.00602169
chr1	66043471-66043472	0.810697	0.547971	0.262726	0.0962338	2.73008	0.00633191
chr1	53512463-53512464	0.936237	0.713179	0.223058	0.0727743	3.06507	0.0021762
chr1	138731234-138731235	0.851753	0.606	0.245754	0.0862968	2.84777	0.00440265
chr1	171774890-171774891	0.953815	0.724083	0.229732	0.0770798	2.98044	0.00287832
chr1	31785014-31785015	0.557628	0.296061	0.261566	0.0960517	2.72318	0.00646559
chr1	62441170-62441171	0.461918	0.719185	-0.257267	0.0937767	-2.7434	0.00608069
chr1	38176148-38176149	0.831391	0.573874	0.257517	0.0939825	2.74006	0.00614288
chr1	77027798-77027799	0.832794	0.582093	0.2507	0.0899167	2.78814	0.00530114
chr1	66621603-66621604	0.814555	0.565614	0.248941	0.0892233	2.79008	0.00526943
chr1	151754505-151754506	0.230594	0.495321	-0.264727	0.0988186	-2.67892	0.00738607
chr1	67661118-67661119	0.818416	0.56628	0.252135	0.0913377	2.76047	0.00577175
chr1	74806178-74806179	0.5259	0.258839	0.26706	0.100598	2.65474	0.00793699
chr1	144753948-144753949	0.701338	0.446903	0.254435	0.0930474	2.73447	0.00624815
chr1	120217821-120217822	0.88495	0.631464	0.253486	0.0924805	2.74097	0.00612587
chr1	41156784-41156785	0.746735	0.493592	0.253142	0.0923596	2.74083	0.00612833
chr1	180995587-180995588	0.782312	0.99715	-0.214838	0.0692646	-3.1017	0.00192412
chr1	24373367-24373368	0.915603	0.671779	0.243825	0.0868574	2.80718	0.00499768
chr1	84477012-84477013	0.895429	0.664038	0.231391	0.0793441	2.9163	0.00354211
chr1	62996289-62996290	0.981215	0.782343	0.198872	0.0597048	3.33092	0.000865593
chr1	67159088-67159089	0.808705	0.561991	0.246714	0.088878	2.77587	0.00550538
chr1	120398543-120398544	0.405461	0.134686	0.270775	0.103597	2.61373	0.00895605
chr1	96034317-96034318	0.941413	0.713201	0.228212	0.0778142	2.93278	0.00335945
chr1	123486969-123486970	0.883923	0.653085	0.230838	0.0794144	2.90676	0.00365198
chr1	178890899-178890900	0.215455	0.480413	-0.264959	0.100209	-2.64406	0.00819174
chr2	133081765-133081766	0.920007	0.502528	0.417479	0.103784	4.02257	5.75654e-05
chr2	179662752-179662753	0.315024	0.0219023	0.293121	0.0766711	3.8231	0.000131784
chr2	180442137-180442138	0.416183	0.762871	-0.346689	0.103511	-3.34929	0.00081019
chr2	146284387-146284388	0.449701	0.775058	-0.325357	0.0964752	-3.37244	0.000745049
chr2	105017554-105017555	0.901703	0.613663	0.288039	0.0814373	3.53695	0.000404784
chr2	154703230-154703231	0.900666	0.596389	0.304277	0.0890823	3.41568	0.000636224
chr2	96318055-96318056	0.298318	0.646413	-0.348096	0.11099	-3.13628	0.00171107
chr2	180414418-180414419	0.89919	0.591634	0.307556	0.0930537	3.30515	0.000949269
chr2	145850420-145850421	0.915408	0.63084	0.284568	0.0828483	3.43481	0.000592967
chr2	42844024-42844025	0.882148	0.599124	0.283023	0.0826032	3.4263	0.000611861
chr2	178654612-178654613	0.508522	0.816486	-0.307963	0.095635	-3.2202	0.00128103
chr2	6097044-6097045	0.89097	0.595193	0.295778	0.0901841	3.27971	0.00103913
chr2	169451604-169451605	0.601431	0.920816	-0.319385	0.101734	-3.13942	0.00169285
chr2	165988330-165988331	0.972284	0.720313	0.251971	0.0704744	3.57536	0.000349747
chr2	84966707-84966708	0.961578	0.665158	0.296421	0.091338	3.24532	0.00117321
chr2	86780920-86780921	0.259838	0.583955	-0.324117	0.104768	-3.09366	0.00197704
chr2	174051205-174051206	0.202042	0.511969	-0.309926	0.0992051	-3.1241	0.00178352
chr2	174918627-174918628	0.150354	0.462659	-0.312305	0.101012	-3.09176	0.00198973
chr2	45061742-45061743	0.696241	0.384734	0.311507	0.10089	3.08758	0.00201793
chr2	159513624-159513625	0.935847	0.676806	0.259041	0.0763558	3.39255	0.000692447
chr2	133557271-133557272	0.852292	0.569421	0.282871	0.0894889	3.16096	0.0015725
chr2	142902469-142902470	0.0619801	0.344868	-0.282887	0.0895466	-3.15911	0.00158253
chr2	174685815-174685816	0.947935	0.694449	0.253486	0.0752794	3.36727	0.00075916
chr2	3541457-3541458	0.872301	0.597786	0.274515	0.0856181	3.20627	0.00134468
chr2	76529962-76529963	0.972545	0.742976	0.229569	0.0637182	3.60288	0.000314709
chr2	23822523-23822524	0.531623	0.248827	0.282796	0.0906135	3.12091	0.00180295
chr2	89718526-89718527	0.931127	0.671109	0.260017	0.0798077	3.25805	0.00112181
chr2	135537044-135537045	0.831511	0.531796	0.299715	0.0996626	3.0073	0.0026358
chr2	54484215-54484216	0.947829	0.680492	0.267337	0.0841201	3.17804	0.00148276
chr2	92584009-92584010	0.934563	0.681559	0.253004	0.0769405	3.28831	0.00100792
chr2	159710691-159710692	0.672639	0.377362	0.295276	0.0988356	2.98755	0.00281223
chr2	6525230-6525231	0.95549	0.689336	0.266154	0.084129	3.16364	0.00155807
chr2	66785552-66785553	0.795329	0.50956	0.285769	0.0943318	3.0294	0.00245038
chr2	28797814-28797815	0.977974	0.741688	0.236286	0.069235	3.41281	0.000642963
chr2	76158404-76158405	0.839916	0.568116	0.271801	0.0879408	3.09073	0.00199668
chr2	49269338-49269339	0.486011	0.770059	-0.284049	0.0942475	-3.01386	0.00257948
chr2	31646101-31646102	0.792272	0.510549	0.281723	0.0932223	3.02206	0.00251063
chr2	9762977-9762978	0.673681	0.935005	-0.261324	0.0831083	-3.14437	0.00166442
chr2	171139570-171139571	0.948	0.700537	0.247463	0.0759978	3.25619	0.00112919
chr2	55001264-55001265	0.784425	0.49333	0.291096	0.098634	2.95127	0.00316471
chr2	17574891-17574892	0.496699	0.774169	-0.27747	0.0916004	-3.02914	0.00245252
chr2	64601510-64601511	0.6591	0.937578	-0.278478	0.0935508	-2.97675	0.00291318
chr2	90868523-90868524	0.50661	0.223412	0.283197	0.096819	2.92502	0.00344434
chr2	85057559-85057560	0.522292	0.809191	-0.286899	0.0991235	-2.89436	0.00379936
chr2	104186242-104186243	0.943271	0.676751	0.26652	0.0884233	3.01414	0.00257709
chr2	128382231-128382232	0.88295	0.619254	0.263697	0.0871224	3.02674	0.00247207
chr2	124941928-124941929	0.954542	0.728377	0.226165	0.0672011	3.36549	0.000764076
chr2	160240404-160240405	0.996896	0.782156	0.214739	0.0611822	3.50983	0.00044839
chr2	110503368-110503369	0.604536	0.87429	-0.269754	0.0905363	-2.97951	0.00288711
chr2	170828389-170828390	0.520064	0.809138	-0.289074	0.101111	-2.85899	0.00424995
chr2	166983127-166983128	0.510801	0.224625	0.286176	0.0997204	2.86979	0.00410748
chr2	162909148-162909149	0.911618	0.66232	0.249297	0.080562	3.09448	0.00197159
chr2	108691219-108691220	0.883365	0.634752	0.248614	0.0802327	3.09866	0.001944
chr2	75074739-75074740	0.866862	0.61376	0.253102	0.0827856	3.05732	0.00223325
chr2	173179412-173179413	0.719967	0.967816	-0.247849	0.0801155	-3.09364	0.00197717
chr2	69721837-69721838	0.80276	0.527412	0.275348	0.0953383	2.88811	0.0038756
chr2	47219059-47219060	0.613321	0.876454	-0.263132	0.0888855	-2.96035	0.00307286
chr2	140284173-140284174	0.91839	0.651282	0.267108	0.0911595	2.93012	0.00338831
chr2	127040104-127040105	0.705561	0.962181	-0.25662	0.0862667	-2.97473	0.00293246
chr2	125304328-125304329	0.898214	0.636231	0.261984	0.0892843	2.93426	0.00334341
chr2	3897372-3897373	0.997338	0.789619	0.207719	0.0595696	3.487	0.00048847
chr2	87605374-87605375	0.285376	0.567473	-0.282098	0.10125	-2.78616	0.00533372
chr2	14264993-14264994	0.907494	0.656222	0.251272	0.0842184	2.98357	0.00284905
chr2	107533384-107533385	0.565127	0.82788	-0.262753	0.0907816	-2.89434	0.00379954
chr2	71528185-71528186	0.0476603	0.290846	-0.243186	0.0798902	-3.044	0.00233453
chr2	134701145-134701146	0.864494	0.613491	0.251003	0.0844074	2.97371	0.00294226
chr2	33543283-33543284	0.493035	0.193897	0.299138	0.111802	2.6756	0.00745952
chr2	68125344-68125345	0.599406	0.317052	0.282355	0.102459	2.75578	0.00585531
chr2	155519470-155519471	0.948448	0.730035	0.218413	0.0669853	3.26061	0.00111173
chr2	137821524-137821525	0.867967	0.611658	0.256309	0.0884397	2.89812	0.00375406
chr2	167373223-167373224	0.884864	0.611089	0.273775	0.0984311	2.78139	0.00541273
chr2	91137290-91137291	0.881046	0.622147	0.258898	0.0899817	2.87723	0.0040118
chr2	56770009-56770010	0.652837	0.914316	-0.261479	0.0916454	-2.85316	0.00432872
chr2	69892457-69892458	0.936641	0.687679	0.248961	0.0846146	2.9423	0.00325786
chr2	180497020-180497021	0.983609	0.783255	0.200355	0.0571028	3.50866	0.000450363
chr2	75936714-75936715	0.870552	0.614961	0.25559	0.0885735	2.88563	0.0039063
chr2	110018948-110018949	0.925658	0.69786	0.227798	0.0729453	3.12285	0.00179107
chr2	147433710-147433711	0.996142	0.780859	0.215283	0.0658621	3.26869	0.00108045
chr2	138318823-138318824	0.482495	0.75027	-0.267774	0.0959409	-2.79103	0.00525402
chr2	30163729-30163730	0.79941	0.539036	0.260374	0.0919204	2.8326	0.00461713
chr2	13632865-13632866	0.637363	0.363299	0.274064	0.100627	2.72356	0.00645819
chr2	145883352-145883353	0.978209	0.754619	0.22359	0.0717493	3.11627	0.00183153
chr2	106786642-106786643	0.915249	0.646983	0.268266	0.0977732	2.74376	0.00607404
chr2	157425399-157425400	0.670416	0.394321	0.276095	0.102603	2.6909	0.00712598
chr2	163171545-163171546	0.659618	0.901257	-0.241639	0.0828582	-2.91629	0.0035422
chr2	60920996-60920997	0.922503	0.696067	0.226436	0.0740324	3.0586	0.00222373
chr2	157749570-157749571	0.254954	0.525288	-0.270334	0.100089	-2.70093	0.00691451
chr2	10261438-10261439	0.943136	0.713002	0.230135	0.0764377	3.01075	0.00260607
chr2	37170886-37170887	0.981423	0.765132	0.216292	0.068515	3.15685	0.00159483
chr2	75387396-75387397	0.679689	0.41607	0.263618	0.0966248	2.72827	0.00636684
chr2	28189513-28189514	0.90751	0.671915	0.235595	0.0801226	2.94043	0.00327756
chr2	84394965-84394966	0.912064	0.670078	0.241986	0.0844088	2.86683	0.004146
chr2	84965825-84965826	0.889087	0.643412	0.245675	0.0867575	2.83174	0.00462952
chr2	70194107-70194108	0.92203	0.681022	0.241008	0.0841308	2.86468	0.00417425
chr2	76422786-76422787	0.922215	0.677832	0.244382	0.0865144	2.82476	0.00473161
chr2	164649779-164649780	0.909218	0.676985	0.232233	0.0792279	2.9312	0.00337654
chr2	104907687-104907688	0.899628	0.655271	0.244357	0.0867082	2.81816	0.00483003
chr2	140384894-140384895	0.835176	0.583413	0.251764	0.0912178	2.76003	0.00577962
chr2	14265771-14265772	0.9596	0.748114	0.211485	0.0671322	3.15028	0.00163112
chr2	173245348-173245349	0.95997	0.735513	0.224457	0.0751189	2.98803	0.00280787
chr2	98488864-98488865	0.819548	0.568814	0.250735	0.091041	2.75408	0.00588567
chr2	154132057-154132058	0.972039	0.772051	0.199988	0.0606508	3.29736	0.000975983
chr2	128154995-128154996	0.953864	0.729056	0.224808	0.0757157	2.96911	0.00298668
chr2	161339536-161339537	0.347633	0.109339	0.238293	0.0840796	2.83414	0.0045949
chr3	66237419-66237420	0.995482	0.675649	0.319833	0.0802014	3.98787	6.6669e-05
chr3	135511215-135511216	0.945233	0.655261	0.289972	0.0747731	3.87803	0.000105306
chr3	129959728-129959729	0.845628	0.531376	0.314252	0.0889468	3.53303	0.00041082
chr3	151135902-151135903	0.721126	0.40019	0.320936	0.0976843	3.28544	0.00101824
chr3	130367632-130367633	0.956853	0.685633	0.271219	0.0778932	3.48194	0.000497795
chr3	138891543-138891544	0.771913	0.465625	0.306288	0.0993384	3.08328	0.00204732
chr3	103719429-103719430	0.781251	0.480667	0.300584	0.0987358	3.04433	0.00233201
chr3	43071295-43071296	0.460739	0.753462	-0.292723	0.0953272	-3.07072	0.00213546
chr3	29812717-29812718	0.947075	0.687663	0.259412	0.0809967	3.20275	0.00136123
chr3	99403998-99403999	0.776907	0.491808	0.285099	0.0946813	3.01114	0.00260269
chr3	59265310-59265311	0.951196	0.694098	0.257098	0.0807471	3.18399	0.00145261
chr3	4283680-4283681	0.773203	0.496942	0.276261	0.090919	3.03854	0.0023773
chr3	75951041-75951042	0.470988	0.173558	0.29743	0.102031	2.91509	0.00355581
chr3	138428060-138428061	0.968526	0.748115	0.22041	0.0631863	3.48826	0.00048617
chr3	153312999-153313000	0.978887	0.752268	0.226619	0.0673428	3.36515	0.000765017
chr3	87025848-87025849	0.979521	0.755286	0.224235	0.066253	3.38452	0.000713026
chr3	157492955-157492956	0.595955	0.305529	0.290426	0.101785	2.85332	0.00432651
chr3	40696405-40696406	0.886302	0.637375	0.248928	0.0796682	3.12456	0.00178073
chr3	115769020-115769021	0.342432	0.637315	-0.294883	0.106713	-2.76333	0.00572145
chr3	110614201-110614202	0.926947	0.679849	0.247097	0.0808091	3.05779	0.00222975
chr3	55021031-55021032	0.320317	0.594721	-0.274403	0.0958604	-2.86253	0.00420275
chr3	130970922-130970923	0.943303	0.713471	0.229832	0.0714139	3.21831	0.00128948
chr3	120688600-120688601	0.890327	0.645014	0.245313	0.0800306	3.06524	0.00217493
chr3	127301403-127301404	0.966711	0.73545	0.231262	0.072527	3.18863	0.0014295
chr3	140827778-140827779	0.938834	0.699152	0.239682	0.0779724	3.07394	0.00211253
chr3	87255676-87255677	0.996837	0.802101	0.194737	0.0529454	3.67807	0.000235005
chr3	55147525-55147526	0.489952	0.211622	0.27833	0.100108	2.78029	0.00543109
chr3	57482245-57482246	0.918577	0.666684	0.251892	0.0857437	2.93774	0.00330618
chr3	59120428-59120429	0.75534	0.479771	0.275569	0.0994374	2.77128	0.00558357
chr3	124269396-124269397	0.697335	0.92499	-0.227655	0.0731926	-3.11036	0.00186861
chr3	104558033-104558034	0.806808	0.542872	0.263936	0.0941629	2.80298	0.00506335
chr3	128590693-128590694	0.792129	0.529673	0.262456	0.0933516	2.81148	0.00493146
chr3	122423828-122423829	0.634023	0.365981	0.268042	0.0974264	2.75122	0.00593729
chr3	103864463-103864464	0.182873	0.444585	-0.261712	0.0939424	-2.78587	0.00533838
chr3	75090455-75090456	0.922024	0.686819	0.235204	0.0785361	2.99486	0.00274573
chr3	107100319-107100320	0.91012	0.682978	0.227142	0.07417	3.06245	0.00219536
chr3	18749650-18749651	0.819209	0.562618	0.256591	0.091396	2.80747	0.00499327
chr3	34688215-34688216	0.997031	0.803731	0.193301	0.0545462	3.5438	0.00039441
chr3	75134585-75134586	0.778621	0.526595	0.252026	0.0900547	2.79858	0.00513273
chr3	87821131-87821132	0.892046	0.645851	0.246195	0.0867657	2.83747	0.00454724
chr3	127190961-127190962	0.931449	0.697394	0.234055	0.0799493	2.92755	0.00341648
chr3	137339686-137339687	0.884413	0.654531	0.229882	0.0778293	2.95366	0.00314027
chr3	149361958-149361959	0.848602	0.611537	0.237065	0.082211	2.88361	0.00393142
chr3	68448599-68448600	0.711674	0.444669	0.267006	0.10051	2.65651	0.00789533
chr3	69480816-69480817	0.916226	0.684349	0.231876	0.0801331	2.89364	0.00380808
chr4	43670999-43671000	0.97572	0.677167	0.298553	0.0751691	3.97175	7.1346e-05
chr4	102559201-102559202	0.522296	0.866359	-0.344062	0.100977	-3.40732	0.000656032
chr4	130728764-130728765	0.58476	0.894283	-0.309523	0.0869924	-3.55805	0.000373618
chr4	28005385-28005386	0.470135	0.806022	-0.335887	0.0985834	-3.40714	0.000656474
chr4	124458877-124458878	0.97411	0.710428	0.263682	0.0694687	3.7957	0.00014723
chr4	142951767-142951768	0.848224	0.531421	0.316804	0.0925874	3.42167	0.000622375
chr4	57272154-57272155	0.725531	0.997171	-0.27164	0.0740334	-3.66916	0.000243351
chr4	22132720-22132721	0.842849	0.538574	0.304275	0.0888087	3.42618	0.000612128
chr4	57664239-57664240	0.977604	0.72581	0.251794	0.0668641	3.76575	0.000166047
chr4	49005646-49005647	0.540255	0.913343	-0.373089	0.121094	-3.08099	0.00206312
chr4	88635383-88635384	0.966367	0.671778	0.294588	0.0904267	3.25776	0.00112297
chr4	85387666-85387667	0.93576	0.641771	0.293989	0.0904141	3.25158	0.00114766
chr4	119189792-119189793	0.953125	0.681292	0.271833	0.0802238	3.38844	0.000702923
chr4	72209662-72209663	0.948205	0.667358	0.280847	0.0858397	3.27176	0.0010688
chr4	129191674-129191675	0.223371	0.548186	-0.324815	0.10738	-3.02491	0.00248703
chr4	43512735-43512736	0.752602	0.424943	0.327659	0.108749	3.013	0.00258683
chr4	138320178-138320179	0.818392	0.50811	0.310282	0.101062	3.07023	0.00213896
chr4	49057145-49057146	0.497757	0.870684	-0.372927	0.131592	-2.83396	0.00459755
chr4	94425630-94425631	0.896741	0.619443	0.277298	0.0868408	3.19317	0.00140718
chr4	66419401-66419402	0.857771	0.5844	0.27337	0.0853578	3.20264	0.00136174
chr4	47505639-47505640	0.571338	0.271357	0.299981	0.0992294	3.0231	0.00250197
chr4	135727102-135727103	0.93122	0.66631	0.26491	0.0823369	3.21739	0.00129361
chr4	117888133-117888134	0.893489	0.622804	0.270685	0.0852594	3.17484	0.00149918
chr4	110859069-110859070	0.647459	0.912586	-0.265127	0.0828734	-3.19919	0.00137816
chr4	118571742-118571743	0.903092	0.623202	0.27989	0.0912267	3.06807	0.00215447
chr4	37825690-37825691	0.696203	0.944455	-0.248252	0.0753552	-3.29443	0.000986214
chr4	146948677-146948678	0.846713	0.548848	0.297865	0.100622	2.96023	0.00307406
chr4	98049831-98049832	0.935463	0.696426	0.239037	0.0726267	3.29131	0.000997227
chr4	94903369-94903370	0.464771	0.789144	-0.324373	0.117471	-2.76132	0.00575688
chr4	84601867-84601868	0.805215	0.530564	0.274651	0.093219	2.9463	0.003216
chr4	35652329-35652330	0.677062	0.935025	-0.257963	0.0855445	-3.01554	0.00256525
chr4	100836338-100836339	0.727394	0.443007	0.284387	0.100168	2.83909	0.00452424
chr4	65730370-65730371	0.796681	0.530072	0.266609	0.0904875	2.94637	0.0032153
chr4	127853304-127853305	0.76809	0.484463	0.283627	0.101012	2.80784	0.00498746
chr4	136955843-136955844	0.182992	0.481212	-0.29822	0.109262	-2.72941	0.00634473
chr4	129227844-129227845	0.95636	0.707898	0.248462	0.0819423	3.03216	0.00242809
chr4	43121134-43121135	0.996808	0.782341	0.214467	0.0632754	3.38943	0.000700383
chr4	125598594-125598595	0.875432	0.604726	0.270706	0.0947966	2.85565	0.00429488
chr4	78230798-78230799	0.408396	0.701425	-0.29303	0.107605	-2.7232	0.00646534
chr4	95934171-95934172	0.489199	0.213623	0.275576	0.0982435	2.80503	0.00503117
chr4	5004172-5004173	0.994056	0.736533	0.257524	0.0883668	2.91426	0.00356533
chr4	137358837-137358838	0.570682	0.290947	0.279735	0.101804	2.74778	0.00600002
chr4	119224856-119224857	0.0804932	0.317612	-0.237119	0.0781789	-3.03303	0.00242112
chr4	94362030-94362031	0.909251	0.670401	0.23885	0.0792542	3.01372	0.00258063
chr4	114109230-114109231	0.541491	0.818177	-0.276686	0.101051	-2.73807	0.00618002
chr4	125310811-125310812	0.71743	0.952304	-0.234874	0.0770956	-3.04653	0.00231498
chr4	144591882-144591883	0.527548	0.258537	0.269011	0.0970701	2.7713	0.00558321
chr4	86373360-86373361	0.996773	0.801029	0.195744	0.0550512	3.55567	0.000377012
chr4	57929379-57929380	0.306779	0.0498763	0.256903	0.0902885	2.84536	0.00443614
chr4	136930620-136930621	0.925986	0.676195	0.249791	0.0863175	2.89386	0.00380539
chr4	106501085-106501086	0.72527	0.43219	0.29308	0.111755	2.62253	0.00872785
chr4	33721684-33721685	0.385184	0.652847	-0.267663	0.0971124	-2.75622	0.00584741
chr4	67082137-67082138	0.70282	0.439286	0.263533	0.0947502	2.78135	0.00541332
chr4	153531202-153531203	0.811524	0.547126	0.264398	0.0957519	2.76128	0.00575748
chr4	12608216-12608217	0.845648	0.599769	0.245879	0.0850478	2.89107	0.00383933
chr4	42963945-42963946	0.39507	0.695047	-0.299977	0.116904	-2.56602	0.0102874
chr4	59040582-59040583	0.90952	0.68111	0.228411	0.0751885	3.03784	0.00238279
chr4	110230731-110230732	0.914438	0.674992	0.239446	0.0816669	2.93199	0.00336802
chr4	47778516-47778517	0.527229	0.26126	0.265969	0.0972687	2.73438	0.00624986
chr4	134541004-134541005	0.945006	0.713457	0.231549	0.0771534	3.00115	0.00268963
chr4	56700626-56700627	0.719981	0.956875	-0.236894	0.0804117	-2.94602	0.00321895
chr4	86181706-86181707	0.910935	0.665972	0.244964	0.0851751	2.876	0.00402748
chr4	84028608-84028609	0.724914	0.453104	0.27181	0.101246	2.68464	0.00726083
chr4	35155147-35155148	0.445064	0.188991	0.256074	0.0924858	2.76879	0.00562652
chr4	56533809-56533810	0.476882	0.181471	0.295411	0.116509	2.53552	0.0112281
chr4	21980561-21980562	0.804669	0.533382	0.271287	0.102148	2.65584	0.00791118
chr4	99602197-99602198	0.769886	0.515805	0.254081	0.091945	2.7634	0.00572025
chr4	57959396-57959397	0.363295	0.0936614	0.269633	0.10145	2.6578	0.00786527
chr4	154112068-154112069	0.707094	0.948894	-0.2418	0.0847592	-2.85279	0.00433375
chr4	129273377-129273378	0.96843	0.750859	0.217571	0.0703957	3.09068	0.00199696
chr4	91332494-91332495	0.921063	0.687851	0.233212	0.0798359	2.92114	0.00348749
chr4	147085942-147085943	0.462027	0.722849	-0.260822	0.0966757	-2.69791	0.00697773
chr4	56020175-56020176	0.343788	0.602047	-0.258259	0.0953666	-2.70807	0.00676759
chr4	106046690-106046691	0.620452	0.877587	-0.257136	0.0947302	-2.7144	0.00663958
chr4	118448570-118448571	0.97796	0.768089	0.209871	0.0662866	3.16611	0.00154491
chr4	149686802-149686803	0.674078	0.91661	-0.242532	0.0860573	-2.81826	0.00482846
chr4	44715791-44715792	0.157993	0.405785	-0.247792	0.0892657	-2.7759	0.00550496
chr4	73225669-73225670	0.977953	0.758802	0.219151	0.0719931	3.04405	0.00233415
chr4	132265472-132265473	0.996713	0.789727	0.206985	0.0646455	3.20186	0.00136545
chr5	102984885-102984886	0.847882	0.540154	0.307727	0.0837933	3.67246	0.000240229
chr5	117746248-117746249	0.949809	0.659167	0.290642	0.0785666	3.6993	0.000216194
chr5	116868598-116868599	0.995891	0.718724	0.277167	0.0734448	3.77381	0.000160774
chr5	151021083-151021084	0.855861	0.530293	0.325568	0.0949702	3.4281	0.000607813
chr5	43637648-43637649	0.82001	0.521509	0.298502	0.0862661	3.46024	0.000539687
chr5	148286158-148286159	0.979339	0.716967	0.262373	0.0709395	3.69854	0.000216842
chr5	75328022-75328023	0.921439	0.630712	0.290728	0.0848967	3.42449	0.000615958
chr5	147058466-147058467	0.698995	0.397397	0.301597	0.0943992	3.19491	0.00139874
chr5	98252738-98252739	0.810344	0.506041	0.304303	0.0962559	3.1614	0.00157015
chr5	105268423-105268424	0.880749	0.618445	0.262304	0.0765649	3.4259	0.000612764
chr5	103195231-103195232	0.791865	0.495424	0.296441	0.0957646	3.09552	0.00196469
chr5	101592106-101592107	0.923057	0.660535	0.262522	0.0807883	3.2495	0.00115606
chr5	117986982-117986983	0.356381	0.0789941	0.277387	0.0889828	3.11731	0.00182509
chr5	53322835-53322836	0.978377	0.746379	0.231998	0.0671942	3.45266	0.000555098
chr5	23070585-23070586	0.326668	0.629013	-0.302345	0.103166	-2.93067	0.00338229
chr5	76147754-76147755	0.916468	0.651998	0.26447	0.0841363	3.14336	0.00167023
chr5	134680425-134680426	0.828652	0.536099	0.292554	0.0986279	2.96624	0.0030147
chr5	134946250-134946251	0.797406	0.490833	0.306572	0.106105	2.88933	0.00386059
chr5	17571974-17571975	0.865346	0.60356	0.261785	0.083209	3.14612	0.00165453
chr5	130705940-130705941	0.692241	0.402839	0.289402	0.0982924	2.9443	0.00323688
chr5	143421440-143421441	0.883292	0.60459	0.278703	0.0927689	3.00427	0.00266219
chr5	135330305-135330306	0.771375	0.484007	0.287368	0.0973111	2.95309	0.00314612
chr5	78842302-78842303	0.960964	0.719556	0.241408	0.0736596	3.27735	0.00104787
chr5	138569844-138569845	0.429054	0.72376	-0.294706	0.102479	-2.87576	0.0040306
chr5	111113321-111113322	0.982311	0.759494	0.222817	0.0647518	3.4411	0.000579358
chr5	136887102-136887103	0.809591	0.513233	0.296358	0.103866	2.85327	0.0043272
chr5	46118299-46118300	0.716078	0.953045	-0.236967	0.0728441	-3.25308	0.00114162
chr5	92386790-92386791	0.299667	0.034364	0.265303	0.0888373	2.98639	0.00282294
chr5	142949642-142949643	0.822142	0.550833	0.271308	0.0926937	2.92693	0.00342323
chr5	149275016-149275017	0.934326	0.674507	0.259819	0.0865574	3.0017	0.00268478
chr5	129343696-129343697	0.959689	0.729847	0.229842	0.0713635	3.22073	0.00127865
chr5	48599427-48599428	0.54101	0.266723	0.274286	0.0962728	2.84905	0.00438494
chr5	43462779-43462780	0.976687	0.761364	0.215322	0.0637563	3.37727	0.000732096
chr5	4956695-4956696	0.688465	0.928863	-0.240398	0.0781643	-3.07555	0.00210114
chr5	60944914-60944915	0.546247	0.285082	0.261165	0.0897921	2.90855	0.0036311
chr5	44028462-44028463	0.666963	0.920032	-0.253069	0.0858198	-2.94884	0.00318966
chr5	24492978-24492979	0.433603	0.720235	-0.286632	0.105825	-2.70854	0.00675801
chr5	46347992-46347993	0.79916	0.543883	0.255277	0.0880087	2.90059	0.00372463
chr5	18656314-18656315	0.903836	0.656367	0.247469	0.0839156	2.94902	0.00318787
chr5	147555354-147555355	0.837006	0.564265	0.27274	0.0987142	2.76293	0.00572854
chr5	72867489-72867490	0.0572918	0.281572	-0.22428	0.0709871	-3.15944	0.00158071
chr5	91542629-91542630	0.737385	0.975821	-0.238437	0.0794574	-3.00081	0.00269262
chr5	95347018-95347019	0.701539	0.42691	0.274629	0.10071	2.72694	0.00639249
chr5	118535691-118535692	0.714589	0.954535	-0.239946	0.0811348	-2.95738	0.00310267
chr5	79144392-79144393	0.676427	0.916408	-0.23998	0.0812596	-2.95325	0.00314443
chr5	46573442-46573443	0.955322	0.730648	0.224674	0.0723735	3.10436	0.00190688
chr5	26157755-26157756	0.857524	0.598295	0.259229	0.092551	2.80093	0.0050956
chr5	128396344-128396345	0.852693	0.599715	0.252978	0.0890688	2.84025	0.0045078
chr5	73616713-73616714	0.943498	0.711527	0.231971	0.0774515	2.99505	0.00274402
chr5	84754020-84754021	0.995215	0.780443	0.214772	0.0675626	3.17885	0.0014786
chr5	134819951-134819952	0.996827	0.798597	0.198231	0.0578308	3.42777	0.00060855
chr5	54596864-54596865	0.846661	0.601835	0.244826	0.0854669	2.86457	0.0041757
chr5	103701666-103701667	0.521358	0.261633	0.259726	0.0945324	2.74748	0.00600557
chr5	138855568-138855569	0.902762	0.659723	0.24304	0.0849882	2.85969	0.00424058
chr5	36313069-36313070	0.376388	0.108408	0.26798	0.100162	2.67548	0.00746226
chr5	102998605-102998606	0.8831	0.647457	0.235643	0.0810185	2.90851	0.0036316
chr5	147944415-147944416	0.573724	0.844644	-0.270919	0.102289	-2.64856	0.00808353
chr5	127111454-127111455	0.595301	0.875847	-0.280546	0.108823	-2.578	0.0099374
chr5	123140587-123140588	0.184272	0.429446	-0.245174	0.0875974	-2.79887	0.0051282
chr5	101558368-101558369	0.434709	0.71124	-0.276531	0.107006	-2.58425	0.00975908
chr5	142786632-142786633	0.812811	0.561453	0.251358	0.0919926	2.73238	0.00628792
chr5	41606618-41606619	0.937671	0.714002	0.223668	0.0751386	2.97674	0.00291329
chr6	121187441-121187442	0.149084	0.555903	-0.406819	0.0993144	-4.09627	4.19859e-05
chr6	3268301-3268302	0.388732	0.757668	-0.368936	0.0987763	-3.73507	0.000187664
chr6	23518828-23518829	0.899585	0.611143	0.288443	0.0800575	3.60294	0.000314635
chr6	17552561-17552562	0.97397	0.69653	0.27744	0.0758666	3.65694	0.000255244
chr6	5986755-5986756	0.159408	0.49788	-0.338472	0.105116	-3.21999	0.00128194
chr6	42741263-42741264	0.359977	0.677851	-0.317874	0.0960888	-3.30813	0.000939203
chr6	104688134-104688135	0.926633	0.63562	0.291013	0.0850518	3.4216	0.000622542
chr6	141251707-141251708	0.942757	0.665247	0.277509	0.0791492	3.50615	0.000454632
chr6	17938018-17938019	0.9167	0.590152	0.326547	0.103217	3.1637	0.00155776
chr6	17762343-17762344	0.972253	0.672664	0.299589	0.0918295	3.26245	0.00110453
chr6	50493687-50493688	0.191237	0.584726	-0.393489	0.135942	-2.89455	0.00379706
chr6	29966138-29966139	0.501461	0.807932	-0.306472	0.0956892	-3.20278	0.00136107
chr6	120150450-120150451	0.119309	0.413487	-0.294178	0.0902787	-3.25856	0.00111981
chr6	134439299-134439300	0.736644	0.411034	0.32561	0.105367	3.09024	0.00199996
chr6	79389074-79389075	0.81085	0.530991	0.27986	0.0856791	3.26637	0.00108936
chr6	148355142-148355143	0.346994	0.680072	-0.333078	0.111591	-2.98481	0.00283753
chr6	50938913-50938914	0.298833	0.0395441	0.259289	0.0776724	3.33824	0.000843108
chr6	114413398-114413399	0.879528	0.603744	0.275784	0.0860216	3.20599	0.001346
chr6	72605872-72605873	0.871435	0.578996	0.292439	0.094545	3.09312	0.00198066
chr6	95725525-95725526	0.931745	0.66531	0.266435	0.0819229	3.25227	0.00114489
chr6	87937056-87937057	0.942534	0.692548	0.249987	0.0739695	3.37959	0.000725943
chr6	127698919-127698920	0.69815	0.945843	-0.247693	0.0736019	-3.3653	0.000764593
chr6	50080729-50080730	0.544845	0.245275	0.29957	0.0995313	3.00981	0.00261413
chr6	53549910-53549911	0.551684	0.848098	-0.296414	0.0987348	-3.00212	0.00268103
chr6	114870201-114870202	0.583764	0.868296	-0.284532	0.0936813	-3.03724	0.00238758
chr6	128354256-128354257	0.897043	0.601939	0.295104	0.100222	2.94452	0.00323461
chr6	44115655-44115656	0.40172	0.690177	-0.288457	0.097726	-2.95169	0.00316039
chr6	5580558-5580559	0.910968	0.663877	0.24709	0.0774004	3.19237	0.00141113
chr6	112739052-112739053	0.931509	0.658962	0.272548	0.0909431	2.9969	0.0027274
chr6	79523996-79523997	0.593006	0.850349	-0.257343	0.083751	-3.07271	0.00212122
chr6	100994885-100994886	0.724493	0.447898	0.276595	0.0944027	2.92994	0.00339022
chr6	82026199-82026200	0.88237	0.624728	0.257643	0.0847035	3.0417	0.00235246
chr6	51333914-51333915	0.785988	0.499928	0.28606	0.100084	2.85819	0.00426062
chr6	124433842-124433843	0.372792	0.0959023	0.276889	0.0959034	2.88717	0.00388725
chr6	17487853-17487854	0.970952	0.72599	0.244962	0.0786454	3.11476	0.00184092
chr6	58768958-58768959	0.711714	0.950575	-0.238862	0.0754391	-3.16629	0.00154398
chr6	91811784-91811785	0.736046	0.45473	0.281316	0.0986825	2.85072	0.00436209
chr6	55092123-55092124	0.981248	0.759244	0.222004	0.0664426	3.34129	0.000833904
chr6	118336710-118336711	0.8236	0.543257	0.280343	0.09871	2.84007	0.00451039
chr6	91222784-91222785	0.808277	0.526695	0.281582	0.0996353	2.82612	0.00471149
chr6	123330969-123330970	0.427626	0.706793	-0.279167	0.0983567	-2.83831	0.00453531
chr6	67531856-67531857	0.666027	0.388564	0.277463	0.0980681	2.82929	0.00466516
chr6	87395528-87395529	0.48655	0.205325	0.281225	0.100335	2.80287	0.00506505
chr6	17516552-17516553	0.39022	0.715524	-0.325304	0.125207	-2.59814	0.00937305
chr6	41157582-41157583	0.953144	0.722062	0.231082	0.0726754	3.17964	0.00147459
chr6	34864133-34864134	0.318907	0.0697485	0.249158	0.0832054	2.99449	0.00274902
chr6	109427306-109427307	0.719093	0.966415	-0.247322	0.082291	-3.00546	0.00265181
chr6	144203371-144203372	0.872624	0.618607	0.254017	0.0862919	2.9437	0.00324314
chr6	85190150-85190151	0.05302	0.291422	-0.238402	0.0781121	-3.05205	0.00227284
chr6	141496263-141496264	0.907154	0.667594	0.23956	0.0790915	3.0289	0.00245448
chr6	105679252-105679253	0.481559	0.192482	0.289077	0.108104	2.67407	0.00749361
chr6	124273520-124273521	0.861034	0.608832	0.252202	0.0872478	2.89064	0.00384454
chr6	70872695-70872696	0.292454	0.569335	-0.276881	0.102018	-2.71403	0.00664692
chr6	48647914-48647915	0.917561	0.6857	0.231861	0.0763011	3.03877	0.00237547
chr6	87522434-87522435	0.507118	0.250078	0.257039	0.0910728	2.82235	0.00476729
chr6	16988219-16988220	0.866173	0.605308	0.260865	0.0935761	2.78773	0.0053079
chr6	125729526-125729527	0.996475	0.790647	0.205829	0.0615762	3.34267	0.000829778
chr6	116727556-116727557	0.511161	0.794546	-0.283385	0.106926	-2.65028	0.0080424
chr6	65186509-65186510	0.698436	0.427631	0.270806	0.0996009	2.71891	0.00654984
chr6	113698976-113698977	0.813187	0.558807	0.25438	0.0903542	2.81536	0.00487221
chr6	12269786-12269787	0.919081	0.690419	0.228662	0.0753006	3.03666	0.00239217
chr6	98109530-98109531	0.850755	0.603598	0.247157	0.0861493	2.86894	0.00411851
chr6	46103461-46103462	0.996619	0.794315	0.202304	0.0599158	3.37647	0.00073423
chr6	50528219-50528220	0.926671	0.685221	0.24145	0.0829542	2.91064	0.00360691
chr6	117431708-117431709	0.868827	0.611987	0.256839	0.092094	2.78888	0.00528904
chr6	12506453-12506454	0.886573	0.650003	0.236571	0.0804669	2.93998	0.00328237
chr6	17854409-17854410	0.644904	0.887855	-0.24295	0.0845921	-2.87202	0.00407857
chr6	99825581-99825582	0.91067	0.641435	0.269236	0.100569	2.67711	0.00742597
chr6	85192375-85192376	0.757999	0.497735	0.260264	0.0954781	2.72591	0.00641252
chr6	92924524-92924525	0.89399	0.649676	0.244315	0.0867162	2.81741	0.0048413
chr6	115731007-115731008	0.541722	0.263912	0.277811	0.107081	2.59441	0.00947541
chr6	83102728-83102729	0.354577	0.635027	-0.28045	0.109151	-2.56937	0.0101883
chr6	129277308-129277309	0.776987	0.509698	0.267289	0.101146	2.64261	0.00822703
chr6	51067965-51067966	0.964859	0.756282	0.208577	0.0656242	3.17835	0.00148114
chr6	141867085-141867086	0.684274	0.909548	-0.225274	0.0757812	-2.97269	0.00295199
chr7	145094409-145094410	0.802158	0.345697	0.456462	0.107674	4.23927	2.24245e-05
chr7	37825807-37825808	0.780034	0.410743	0.369291	0.104487	3.53432	0.000408821
chr7	70638403-70638404	0.868386	0.57401	0.294377	0.0795357	3.70119	0.000214593
chr7	89522518-89522519	0.943645	0.661306	0.282339	0.0758513	3.72227	0.000197437
chr7	84306407-84306408	0.618481	0.932616	-0.314134	0.0896149	-3.50538	0.000455955
chr7	11519414-11519415	0.842645	0.517182	0.325463	0.0955467	3.40633	0.000658429
chr7	27302155-27302156	0.351852	0.0478133	0.304038	0.090753	3.35017	0.000807614
chr7	79822296-79822297	0.910475	0.621363	0.289112	0.0853948	3.3856	0.000710236
chr7	52730037-52730038	0.69056	0.390863	0.299697	0.091055	3.29139	0.00099694
chr7	44395380-44395381	0.995017	0.749656	0.245361	0.0670116	3.66146	0.000250779
chr7	82295030-82295031	0.956381	0.664878	0.291503	0.0883398	3.29979	0.00096756
chr7	46172531-46172532	0.88745	0.584916	0.302533	0.0968863	3.12256	0.00179285
chr7	89892697-89892698	0.712431	0.392203	0.320228	0.108312	2.95654	0.00311114
chr7	4811488-4811489	0.0495357	0.309309	-0.259774	0.0798792	-3.25208	0.00114564
chr7	75437077-75437078	0.939386	0.689901	0.249485	0.074837	3.33371	0.000856958
chr7	121023343-121023344	0.40376	0.69355	-0.28979	0.0961208	-3.01485	0.00257106
chr7	101539353-101539354	0.70077	0.411237	0.289533	0.0964082	3.00319	0.00267161
chr7	54518225-54518226	0.69852	0.408661	0.289859	0.0965962	3.00072	0.00269338
chr7	37625167-37625168	0.550623	0.242374	0.308249	0.107478	2.86801	0.00413056
chr7	7108201-7108202	0.667178	0.940596	-0.273418	0.0902246	-3.03042	0.00244218
chr7	36046676-36046677	0.856452	0.567621	0.288831	0.0985142	2.93187	0.00336931
chr7	30219129-30219130	0.927225	0.661479	0.265747	0.0864731	3.07317	0.00211798
chr7	92906053-92906054	0.965074	0.736221	0.228853	0.0672997	3.40051	0.000672614
chr7	122279110-122279111	0.944687	0.700706	0.243981	0.0756528	3.22501	0.00125969
chr7	117376084-117376085	0.313105	0.0472454	0.26586	0.0874806	3.03907	0.00237311
chr7	138617128-138617129	0.387429	0.676711	-0.289281	0.0999802	-2.89339	0.0038111
chr7	132046219-132046220	0.931814	0.689215	0.242598	0.0754901	3.21364	0.00131063
chr7	64908940-64908941	0.995851	0.789666	0.206185	0.0569602	3.61981	0.000294824
chr7	108875931-108875932	0.595283	0.310313	0.284969	0.100179	2.84461	0.00444662
chr7	73799888-73799889	0.697139	0.942174	-0.245035	0.0798345	-3.06929	0.00214568
chr7	130373400-130373401	0.929508	0.680789	0.248719	0.0819541	3.03486	0.00240647
chr7	111765471-111765472	0.929652	0.691651	0.238001	0.0765338	3.10975	0.00187247
chr7	137953772-137953773	0.639109	0.356563	0.282546	0.101755	2.77673	0.0054908
chr7	3492172-3492173	0.96274	0.725589	0.237152	0.0765061	3.09978	0.00193666
chr7	126718870-126718871	0.976558	0.76575	0.210808	0.0618992	3.40567	0.000660025
chr7	30872958-30872959	0.371941	0.104407	0.267533	0.0939535	2.84751	0.00440629
chr7	95543676-95543677	0.82109	0.566886	0.254203	0.0864828	2.93935	0.00328897
chr7	139967423-139967424	0.858751	0.589842	0.268909	0.0951937	2.82486	0.00473013
chr7	62419841-62419842	0.102673	0.398412	-0.295739	0.110525	-2.67576	0.0074561
chr7	122253131-122253132	0.946733	0.722822	0.223911	0.0704353	3.17896	0.00147804
chr7	19403333-19403334	0.983154	0.772456	0.210698	0.0630719	3.3406	0.000835964
chr7	4095977-4095978	0.928288	0.68129	0.246998	0.0838178	2.94684	0.00321039
chr7	30343289-30343290	0.956777	0.720645	0.236132	0.0777046	3.03885	0.00237485
chr7	24930683-24930684	0.509591	0.230011	0.279579	0.102954	2.71558	0.00661593
chr7	78751101-78751102	0.64069	0.917733	-0.277043	0.101695	-2.72426	0.00644461
chr7	126345241-126345242	0.300293	0.0533788	0.246914	0.0844812	2.92272	0.00346994
chr7	142582518-142582519	0.803299	0.537766	0.265533	0.0953851	2.7838	0.00537263
chr7	4817589-4817590	0.908236	0.652991	0.255245	0.0894835	2.85243	0.00433864
chr7	89459832-89459833	0.687522	0.402747	0.284775	0.107111	2.6587	0.00784439
chr7	114012450-114012451	0.171516	0.42953	-0.258014	0.0916186	-2.81618	0.00485984
chr7	15686720-15686721	0.947295	0.72085	0.226445	0.0734584	3.08264	0.00205176
chr7	60155731-60155732	0.644149	0.90535	-0.261202	0.0936933	-2.78784	0.00530615
chr7	5292086-5292087	0.847826	0.602844	0.244982	0.0843371	2.9048	0.00367493
chr7	53814437-53814438	0.319863	0.591609	-0.271747	0.100003	-2.71739	0.00657985
chr7	17196976-17196977	0.865007	0.613888	0.251119	0.0880722	2.85128	0.0043543
chr7	113059829-113059830	0.44455	0.187344	0.257206	0.0920054	2.79555	0.00518107
chr7	69849368-69849369	0.540873	0.279873	0.261001	0.0943332	2.76679	0.00566103
chr7	18300594-18300595	0.386806	0.653814	-0.267008	0.0980437	-2.72335	0.00646229
chr7	132537489-132537490	0.862243	0.615522	0.246721	0.0861976	2.86227	0.00420616
chr7	19607856-19607857	0.996425	0.797785	0.19864	0.0579569	3.42738	0.000609445
chr7	48615628-48615629	0.783212	0.532307	0.250905	0.0888346	2.82441	0.00473682
chr7	74651547-74651548	0.967516	0.752566	0.21495	0.067842	3.16839	0.00153286
chr7	16956537-16956538	0.875472	0.631317	0.244155	0.0851331	2.86792	0.00413186
chr7	64218688-64218689	0.92467	0.671568	0.253102	0.090724	2.7898	0.00527409
chr7	63322573-63322574	0.462334	0.195462	0.266871	0.0997936	2.67423	0.00749
chr7	90304894-90304895	0.895083	0.655604	0.239479	0.0838196	2.85708	0.00427557
chr7	105753373-105753374	0.974879	0.749406	0.225473	0.0755695	2.98365	0.00284831
chr7	29228015-29228016	0.754625	0.503666	0.25096	0.0914281	2.74488	0.00605322
chr7	84487110-84487111	0.822193	0.574667	0.247527	0.0894318	2.76777	0.00564411
chr7	122979286-122979287	0.826401	0.584661	0.241741	0.0859343	2.81309	0.00490682
chr8	108040695-108040696	0.937828	0.665531	0.272297	0.0774843	3.51422	0.00044104
chr8	100174862-100174863	0.651194	0.918425	-0.26723	0.076404	-3.49759	0.000469477
chr8	109079100-109079101	0.996761	0.746946	0.249815	0.0686514	3.63889	0.00027382
chr8	108015029-108015030	0.934989	0.663451	0.271538	0.0786089	3.45429	0.000551738
chr8	72722893-72722894	0.714956	0.384881	0.330075	0.106687	3.09386	0.0019757
chr8	15684036-15684037	0.839894	0.538998	0.300896	0.0946509	3.179	0.00147782
chr8	69749274-69749275	0.633141	0.337598	0.295543	0.0962871	3.0694	0.00214491
chr8	126125986-126125987	0.963728	0.722502	0.241226	0.0697556	3.45816	0.000543879
chr8	107926387-107926388	0.962036	0.710467	0.251569	0.0752351	3.34377	0.000826488
chr8	4895542-4895543	0.239679	0.52761	-0.287931	0.0937352	-3.07175	0.0021281
chr8	125270643-125270644	0.938517	0.680946	0.257571	0.0791386	3.25468	0.0011352
chr8	119515520-119515521	0.6503	0.926455	-0.276156	0.0903836	-3.05537	0.00224783
chr8	9710384-9710385	0.933062	0.689687	0.243375	0.0740527	3.28651	0.00101438
chr8	65153940-65153941	0.493095	0.778339	-0.285244	0.0965164	-2.9554	0.00312266
chr8	110687681-110687682	0.970004	0.728976	0.241028	0.0740083	3.25676	0.0011269
chr8	95508600-95508601	0.782651	0.481411	0.30124	0.106032	2.84102	0.00449689
chr8	45872704-45872705	0.82854	0.550483	0.278058	0.0943115	2.94829	0.00319535
chr8	25465595-25465596	0.786501	0.493479	0.293022	0.102519	2.8582	0.00426045
chr8	64646207-64646208	0.722531	0.967964	-0.245432	0.0777547	-3.15649	0.00159678
chr8	16591759-16591760	0.337898	0.618199	-0.2803	0.0971878	-2.88411	0.00392521
chr8	64704180-64704181	0.997295	0.772928	0.224368	0.0672894	3.33437	0.000854938
chr8	125184659-125184660	0.875624	0.598197	0.277427	0.0963737	2.87866	0.00399366
chr8	95713395-95713396	0.943774	0.67697	0.266804	0.0907352	2.94046	0.00327721
chr8	117348793-117348794	0.0820127	0.336053	-0.25404	0.0845729	-3.0038	0.00266628
chr8	48011846-48011847	0.731983	0.458607	0.273377	0.0952705	2.86948	0.0041115
chr8	29376330-29376331	0.924227	0.687758	0.236469	0.0751597	3.14622	0.00165395
chr8	125199170-125199171	0.117908	0.37514	-0.257232	0.0866901	-2.96726	0.00300467
chr8	126518620-126518621	0.889754	0.639948	0.249806	0.0829244	3.01246	0.00259141
chr8	79103273-79103274	0.96849	0.751249	0.217241	0.0650094	3.34168	0.000832728
chr8	68133170-68133171	0.865902	0.584191	0.281711	0.101597	2.77282	0.00555727
chr8	25484988-25484989	0.828147	0.553257	0.27489	0.0979801	2.80557	0.00502274
chr8	10910471-10910472	0.423045	0.155792	0.267254	0.0938103	2.84887	0.00438743
chr8	109646588-109646589	0.922125	0.672018	0.250107	0.0850614	2.94031	0.00327884
chr8	103311627-103311628	0.91985	0.689112	0.230737	0.0754991	3.05616	0.0022419
chr8	59546878-59546879	0.700164	0.415414	0.28475	0.106944	2.66261	0.00775383
chr8	115723216-115723217	0.981767	0.777371	0.204396	0.0603693	3.38576	0.000709827
chr8	14995412-14995413	0.239392	0.516709	-0.277317	0.10273	-2.69948	0.00694483
chr8	121452843-121452844	0.932124	0.693293	0.238831	0.0804311	2.96939	0.00298391
chr8	47690628-47690629	0.861582	0.606345	0.255237	0.0899922	2.83621	0.00456519
chr8	8469016-8469017	0.926545	0.699099	0.227446	0.0742741	3.06224	0.00219684
chr8	71405511-71405512	0.014574	0.220394	-0.20582	0.0620853	-3.31512	0.000916039
chr8	11474620-11474621	0.850933	0.601568	0.249366	0.0876689	2.8444	0.0044495
chr8	34890931-34890932	0.624718	0.873814	-0.249096	0.0881483	-2.82588	0.00471515
chr8	106450487-106450488	0.996682	0.797373	0.199309	0.0587421	3.39295	0.000691449
chr8	77223873-77223874	0.943322	0.722657	0.220665	0.0715024	3.08612	0.00202786
chr8	12823680-12823681	0.969058	0.754431	0.214627	0.068288	3.14297	0.00167242
chr8	109093038-109093039	0.109396	0.353487	-0.24409	0.0858707	-2.84254	0.00447563
chr8	39005497-39005498	0.256754	0.524973	-0.268218	0.100345	-2.67296	0.0075185
chr8	122863148-122863149	0.573426	0.301383	0.272043	0.103022	2.64063	0.00827524
chr8	118522188-118522189	0.912744	0.684067	0.228677	0.0770064	2.96959	0.002982
chr8	3606269-3606270	0.974107	0.755067	0.21904	0.0715222	3.06254	0.00219465
chr8	70502878-70502879	0.843553	0.573966	0.269587	0.101981	2.64351	0.00820518
chr8	86808375-86808376	0.624076	0.352457	0.271619	0.103452	2.62555	0.00865101
chr8	3878407-3878408	0.363691	0.640881	-0.27719	0.107226	-2.58509	0.0097353
chr8	122592175-122592176	0.70316	0.94775	-0.24459	0.087643	-2.79075	0.00525862
chr9	65122689-65122690	0.860455	0.49192	0.368535	0.101499	3.63092	0.000282416
chr9	44511649-44511650	0.910915	0.596372	0.314543	0.0934716	3.36511	0.000765118
chr9	106887670-106887671	0.908251	0.60427	0.303982	0.0901133	3.37333	0.000742651
chr9	22193692-22193693	0.973138	0.717371	0.255767	0.070689	3.6182	0.000296663
chr9	104748838-104748839	0.151992	0.459645	-0.307652	0.094769	-3.24634	0.00116899
chr9	58132908-58132909	0.956493	0.694653	0.26184	0.0755148	3.4674	0.00052552
chr9	62797689-62797690	0.703991	0.394177	0.309814	0.0985999	3.14213	0.00167722
chr9	69874887-69874888	0.441349	0.779791	-0.338442	0.113255	-2.98831	0.00280528
chr9	31864194-31864195	0.925983	0.663113	0.26287	0.0793604	3.31236	0.000925134
chr9	31940631-31940632	0.873998	0.593551	0.280447	0.088084	3.18386	0.00145327
chr9	42672916-42672917	0.873255	0.585585	0.287671	0.0924323	3.11223	0.00185679
chr9	122716324-122716325	0.629063	0.318944	0.310119	0.105336	2.94408	0.00323911
chr9	99604514-99604515	0.978138	0.756341	0.221797	0.0625633	3.54517	0.00039236
chr9	84409157-84409158	0.705913	0.404429	0.301484	0.106592	2.8284	0.00467815
chr9	67562593-67562594	0.958269	0.720225	0.238044	0.0731445	3.25443	0.0011362
chr9	120550802-120550803	0.726864	0.974584	-0.24772	0.078402	-3.15961	0.00157979
chr9	50374357-50374358	0.955077	0.711303	0.243774	0.0769288	3.16883	0.00153053
chr9	115340870-115340871	0.85339	0.589335	0.264055	0.0879648	3.00182	0.00268369
chr9	22187528-22187529	0.598979	0.904364	-0.305385	0.110391	-2.7664	0.00566793
chr9	7300354-7300355	0.893692	0.624327	0.269365	0.0912643	2.95149	0.00316247
chr9	58710787-58710788	0.427791	0.706918	-0.279127	0.0966845	-2.88699	0.00388945
chr9	102220654-102220655	0.400547	0.687561	-0.287014	0.101359	-2.83165	0.0046308
chr9	41181682-41181683	0.983611	0.763736	0.219875	0.0660933	3.32674	0.000878687
chr9	41326315-41326316	0.965334	0.725488	0.239846	0.0772968	3.10293	0.00191617
chr9	15330780-15330781	0.537812	0.807653	-0.269842	0.0940773	-2.86829	0.00412691
chr9	104583189-104583190	0.809518	0.545195	0.264323	0.0920087	2.87281	0.00406845
chr9	21245137-21245138	0.384379	0.106847	0.277532	0.0997309	2.78281	0.00538908
chr9	87813300-87813301	0.784667	0.524264	0.260403	0.0906688	2.87203	0.00407847
chr9	53989570-53989571	0.458978	0.180798	0.278181	0.100947	2.7557	0.0058566
chr9	51561643-51561644	0.619754	0.880602	-0.260849	0.0913469	-2.85558	0.0042958
chr9	118685364-118685365	0.700192	0.941325	-0.241133	0.0802847	-3.00347	0.00266918
chr9	74892955-74892956	0.959805	0.739625	0.22018	0.0686295	3.20824	0.00133552
chr9	80570093-80570094	0.829026	0.560706	0.26832	0.0969133	2.76866	0.00562868
chr9	87174876-87174877	0.650325	0.894647	-0.244322	0.0831298	-2.93904	0.00329226
chr9	58856681-58856682	0.977483	0.758181	0.219302	0.0689743	3.17947	0.00147544
chr9	75366820-75366821	0.492921	0.213633	0.279288	0.103865	2.68894	0.00716793
chr9	105263622-105263623	0.612587	0.871273	-0.258686	0.0920456	-2.81041	0.0049478
chr9	57137697-57137698	0.928896	0.678373	0.250524	0.0873997	2.86641	0.00415155
chr9	28289505-28289506	0.589605	0.846522	-0.256917	0.091156	-2.81843	0.00482588
chr9	51662894-51662895	0.872222	0.611458	0.260764	0.0940381	2.77296	0.00555485
chr9	50154016-50154017	0.842933	0.583534	0.259399	0.0933383	2.77913	0.00545052
chr9	50482711-50482712	0.954835	0.724686	0.230149	0.0764346	3.01105	0.00260345
chr9	99708808-99708809	0.938121	0.715955	0.222166	0.071765	3.09574	0.0019632
chr9	63542103-63542104	0.115301	0.377115	-0.261813	0.095172	-2.75095	0.00594231
chr9	96324974-96324975	0.900281	0.657231	0.24305	0.084137	2.88874	0.00386787
chr9	26835870-26835871	0.871849	0.623559	0.248289	0.0875115	2.83722	0.00455085
chr9	69983963-69983964	0.764526	0.996694	-0.232167	0.0780385	-2.97504	0.00292952
chr9	7185498-7185499	0.333288	0.0932479	0.24004	0.0827571	2.90053	0.00372527
chr9	63781269-63781270	0.753837	0.489205	0.264632	0.0974261	2.71624	0.00660285
chr9	54036623-54036624	0.775331	0.512442	0.262889	0.0969207	2.71241	0.00667964
chr9	43071423-43071424	0.963228	0.750455	0.212774	0.0673296	3.16018	0.00157673
chr9	105857225-105857226	0.868336	0.62062	0.247715	0.0883976	2.80229	0.00507419
chr9	97290800-97290801	0.853022	0.603549	0.249472	0.0895404	2.78614	0.00533397
chr9	87148542-87148543	0.907047	0.667017	0.24003	0.0840782	2.85484	0.00430579
chr9	103285751-103285752	0.903286	0.668115	0.235171	0.0811916	2.8965	0.00377351
chr9	22090299-22090300	0.540345	0.817881	-0.277535	0.107204	-2.58884	0.00962985
chr9	122557194-122557195	0.561258	0.815089	-0.253831	0.0929253	-2.73156	0.00630356
chr9	13905523-13905524	0.651891	0.906367	-0.254475	0.0938179	-2.71244	0.00667899
chr9	23940811-23940812	0.746747	0.50106	0.245687	0.0885592	2.77427	0.00553258
chr9	74832555-74832556	0.929566	0.707697	0.221869	0.074093	2.99447	0.00274926
chr10	55180418-55180419	0.654246	0.196282	0.457964	0.0996002	4.59802	4.26518e-06
chr10	58880842-58880843	0.69401	0.233155	0.460854	0.111649	4.1277	3.66412e-05
chr10	11802109-11802110	0.850417	0.491821	0.358596	0.0882178	4.06489	4.80547e-05
chr10	54530222-54530223	0.819684	0.404935	0.414749	0.107939	3.84245	0.000121813
chr10	55205693-55205694	0.680955	0.249717	0.431238	0.113654	3.7943	0.00014806
chr10	55197993-55197994	0.772299	0.383913	0.388386	0.100914	3.84868	0.000118756
chr10	95608930-95608931	0.935086	0.6143	0.320786	0.083798	3.82808	0.000129145
chr10	58433748-58433749	0.822856	0.415477	0.407379	0.129337	3.14975	0.00163413
chr10	54756049-54756050	0.764399	0.387731	0.376668	0.120496	3.12598	0.00177211
chr10	44265412-44265413	0.951559	0.680768	0.270791	0.0750596	3.60768	0.000308945
chr10	80928465-80928466	0.818704	0.475585	0.343119	0.109208	3.14189	0.00167859
chr10	91420368-91420369	0.892319	0.616035	0.276284	0.0794533	3.47731	0.000506468
chr10	44766420-44766421	0.94503	0.685301	0.259729	0.0726557	3.57479	0.000350513
chr10	89346340-89346341	0.501104	0.808253	-0.307149	0.0954723	-3.21715	0.00129469
chr10	61637932-61637933	0.984371	0.749057	0.235313	0.0636323	3.69802	0.000217292
chr10	19817936-19817937	0.92871	0.659635	0.269075	0.0807646	3.3316	0.000863482
chr10	55174401-55174402	0.826687	0.509739	0.316948	0.103831	3.05253	0.00226921
chr10	123498791-123498792	0.944189	0.676129	0.26806	0.0810439	3.30759	0.000941028
chr10	119177870-119177871	0.829129	0.531115	0.298014	0.095537	3.11935	0.0018125
chr10	95774564-95774565	0.940461	0.682153	0.258308	0.0773338	3.34017	0.000837264
chr10	126970226-126970227	0.954816	0.716229	0.238586	0.0680257	3.5073	0.00045268
chr10	4120764-4120765	0.696219	0.395566	0.300653	0.0985913	3.04949	0.00229232
chr10	46082594-46082595	0.807929	0.524559	0.28337	0.090797	3.12092	0.00180289
chr10	51654954-51654955	0.976091	0.756352	0.21974	0.0596798	3.68198	0.000231432
chr10	63785461-63785462	0.311142	0.657555	-0.346413	0.123452	-2.80606	0.00501512
chr10	115610017-115610018	0.887027	0.620371	0.266656	0.0840194	3.17374	0.00150487
chr10	86244989-86244990	0.860582	0.594797	0.265786	0.0842078	3.15631	0.00159781
chr10	8005658-8005659	0.99695	0.776366	0.220584	0.0623459	3.53806	0.000403076
chr10	127177394-127177395	0.328054	0.0684633	0.25959	0.0826469	3.14096	0.00168396
chr10	79773256-79773257	0.541486	0.266525	0.27496	0.0921745	2.98304	0.00285398
chr10	72272541-72272542	0.869671	0.611787	0.257885	0.0842376	3.06139	0.00220309
chr10	60530852-60530853	0.61276	0.309866	0.302894	0.109206	2.77361	0.00554383
chr10	42994578-42994579	0.683079	0.384737	0.298341	0.107581	2.77319	0.00555096
chr10	45998756-45998757	0.390111	0.682783	-0.292672	0.105148	-2.78344	0.00537863
chr10	51247578-51247579	0.66029	0.365394	0.294896	0.106418	2.7711	0.00558667
chr10	55234153-55234154	0.466337	0.179882	0.286454	0.102407	2.79721	0.00515462
chr10	14210252-14210253	0.933892	0.700809	0.233083	0.0732562	3.18175	0.0014639
chr10	126692003-126692004	0.34723	0.640284	-0.293054	0.107019	-2.73832	0.00617532
chr10	24781259-24781260	0.903193	0.659596	0.243596	0.0795871	3.06075	0.00220782
chr10	83079167-83079168	0.776564	0.997054	-0.22049	0.066801	-3.3007	0.000964454
chr10	41911349-41911350	0.923269	0.676263	0.247006	0.0816566	3.02493	0.00248687
chr10	46878977-46878978	0.859203	0.607094	0.252109	0.0852207	2.9583	0.00309338
chr10	71980016-71980017	0.904826	0.656882	0.247945	0.083137	2.98236	0.00286033
chr10	39376886-39376887	0.974221	0.73378	0.240441	0.0804711	2.98792	0.00280886
chr10	105011831-105011832	0.849993	0.579864	0.27013	0.0979607	2.75753	0.00582395
chr10	94521131-94521132	0.861965	0.585292	0.276673	0.102099	2.70984	0.0067315
chr10	68111654-68111655	0.650179	0.90251	-0.252332	0.0882864	-2.8581	0.0042618
chr10	109638725-109638726	0.927669	0.683883	0.243786	0.0838071	2.90889	0.00362715
chr10	58629416-58629417	0.740374	0.969611	-0.229237	0.0754501	-3.03826	0.00237946
chr10	52032753-52032754	0.985601	0.782068	0.203533	0.0604818	3.36519	0.000764907
chr10	10653931-10653932	0.837635	0.580957	0.256677	0.0916738	2.7999	0.0051119
chr10	58628124-58628125	0.600334	0.312312	0.288022	0.110362	2.60978	0.00905996
chr10	85045841-85045842	0.263497	0.549565	-0.286068	0.10941	-2.61464	0.00893215
chr10	103811048-103811049	0.46205	0.730979	-0.268929	0.0993999	-2.70552	0.00681969
chr10	4164798-4164799	0.96463	0.741888	0.222742	0.0723318	3.07945	0.00207384
chr10	78749195-78749196	0.918296	0.686203	0.232094	0.0780455	2.97382	0.00294115
chr10	90069491-90069492	0.958193	0.732724	0.225469	0.0749727	3.00734	0.00263544
chr10	45381128-45381129	0.577314	0.863471	-0.286157	0.111783	-2.55993	0.0104693
chr10	125940434-125940435	0.963944	0.751905	0.212039	0.0672074	3.155	0.00160498
chr10	61069631-61069632	0.686408	0.387359	0.29905	0.120292	2.48603	0.0129178
chr10	71610366-71610367	0.885743	0.655384	0.230359	0.0785851	2.93133	0.0033751
chr10	110454340-110454341	0.867605	0.629189	0.238415	0.0835605	2.85321	0.00432807
chr10	58324496-58324497	0.455676	0.196094	0.259582	0.096485	2.69038	0.00713703
chr10	94271025-94271026	0.796893	0.538598	0.258295	0.0957546	2.69747	0.00698679
chr10	114913829-114913830	0.852179	0.615731	0.236448	0.0826574	2.86058	0.00422873
chr10	117645783-117645784	0.949816	0.72733	0.222486	0.0744312	2.98915	0.00279751
chr11	35955800-35955801	0.645572	0.303549	0.342023	0.102828	3.32616	0.000880519
chr11	84707251-84707252	0.90359	0.583744	0.319846	0.0949	3.37034	0.000750745
chr11	107371905-107371906	0.849966	0.542286	0.307681	0.091138	3.37599	0.000735519
chr11	58917417-58917418	0.0304378	0.301404	-0.270966	0.0804508	-3.3681	0.000756886
chr11	45000158-45000159	0.719837	0.423534	0.296303	0.0967097	3.06384	0.00218513
chr11	85995118-85995119	0.783156	0.49563	0.287526	0.0942369	3.05109	0.00228009
chr11	68267775-68267776	0.826674	0.534433	0.292241	0.0971992	3.00662	0.00264167
chr11	106377116-106377117	0.994921	0.757424	0.237497	0.0696036	3.41214	0.000644541
chr11	53929894-53929895	0.585079	0.883975	-0.298896	0.101101	-2.9564	0.00311249
chr11	57162801-57162802	0.942564	0.694703	0.247861	0.0751416	3.29858	0.000971735
chr11	27008830-27008831	0.800671	0.500086	0.300585	0.101977	2.94757	0.00320277
chr11	73231029-73231030	0.953379	0.698795	0.254584	0.0788013	3.23071	0.00123485
chr11	118765729-118765730	0.911331	0.64613	0.265202	0.0846223	3.13395	0.00172473
chr11	117000011-117000012	0.271569	0.559744	-0.288175	0.0976647	-2.95066	0.00317095
chr11	7094779-7094780	0.983195	0.727489	0.255706	0.0810122	3.15639	0.00159738
chr11	90779786-90779787	0.431128	0.719942	-0.288814	0.0983979	-2.93516	0.00333371
chr11	35734546-35734547	0.886222	0.609363	0.276859	0.0926363	2.98866	0.00280203
chr11	115448105-115448106	0.571653	0.886552	-0.314899	0.113438	-2.77596	0.00550386
chr11	61047574-61047575	0.436531	0.730045	-0.293514	0.102116	-2.87432	0.00404903
chr11	3332490-3332491	0.313023	0.0472408	0.265782	0.0876642	3.03182	0.00243082
chr11	80353348-80353349	0.68505	0.950447	-0.265397	0.0877057	-3.02599	0.0024782
chr11	106660171-106660172	0.598849	0.873248	-0.274399	0.0936041	-2.93149	0.00337343
chr11	63888745-63888746	0.620685	0.884037	-0.263352	0.0882687	-2.98353	0.00284946
chr11	106764026-106764027	0.982136	0.76961	0.212526	0.0609526	3.48674	0.000488951
chr11	66087546-66087547	0.602569	0.309522	0.293047	0.10496	2.79197	0.00523875
chr11	51881211-51881212	0.940655	0.678921	0.261734	0.088053	2.97246	0.00295426
chr11	17500595-17500596	0.681672	0.397946	0.283727	0.100158	2.83279	0.00461442
chr11	16941908-16941909	0.589304	0.855577	-0.266273	0.091297	-2.91656	0.00353915
chr11	75801106-75801107	0.869605	0.5965	0.273105	0.0954514	2.8612	0.00422044
chr11	30712745-30712746	0.869943	0.612063	0.25788	0.0871154	2.96021	0.00307427
chr11	21140996-21140997	0.899142	0.648777	0.250365	0.0843367	2.96864	0.00299126
chr11	117451174-117451175	0.294668	0.587828	-0.293161	0.108563	-2.70037	0.00692621
chr11	95903091-95903092	0.894531	0.647388	0.247143	0.0828493	2.98304	0.00285398
chr11	106330161-106330162	0.971004	0.737251	0.233753	0.0760539	3.07352	0.00211547
chr11	53700566-53700567	0.92579	0.695215	0.230575	0.0744785	3.09586	0.00196244
chr11	55302807-55302808	0.756035	0.996747	-0.240713	0.0803216	-2.99686	0.00272777
chr11	60804620-60804621	0.832124	0.572665	0.25946	0.0910554	2.84947	0.00437919
chr11	36042583-36042584	0.996749	0.795938	0.200811	0.0578053	3.47392	0.000512917
chr11	96475003-96475004	0.862636	0.593294	0.269342	0.0971856	2.77142	0.00558122
chr11	107800692-107800693	0.940757	0.703376	0.237381	0.079208	2.99693	0.00272713
chr11	5139859-5139860	0.0942108	0.348856	-0.254645	0.0893666	-2.84944	0.00437956
chr11	108136479-108136480	0.890038	0.631615	0.258423	0.0917013	2.8181	0.00483086
chr11	75772607-75772608	0.853009	0.592689	0.26032	0.0931024	2.79607	0.0051729
chr11	63024426-63024427	0.835702	0.574752	0.26095	0.0935175	2.79039	0.00526442
chr11	115448128-115448129	0.647211	0.92516	-0.277948	0.103667	-2.68116	0.00733672
chr11	58427204-58427205	0.872724	0.615465	0.25726	0.0919971	2.79639	0.00516771
chr11	72397218-72397219	0.204475	0.470838	-0.266364	0.0975945	-2.72929	0.00634713
chr11	54341811-54341812	0.461004	0.176719	0.284285	0.108207	2.62723	0.00860829
chr11	62755886-62755887	0.532336	0.809638	-0.277302	0.104227	-2.66055	0.00780141
chr11	77896248-77896249	0.909659	0.676712	0.232947	0.078326	2.97407	0.0029388
chr11	110416632-110416633	0.618415	0.349406	0.269009	0.100002	2.69004	0.00714433
chr11	3746581-3746582	0.444794	0.719833	-0.27504	0.10363	-2.65404	0.00795335
chr11	97068760-97068761	0.757371	0.981912	-0.224541	0.073977	-3.03528	0.00240314
chr11	3332495-3332496	0.289541	0.0488553	0.240686	0.0837768	2.87294	0.00406674
chr11	52703508-52703509	0.466173	0.191266	0.274907	0.104271	2.63646	0.00837749
chr11	103224275-103224276	0.567615	0.862246	-0.294631	0.116214	-2.53523	0.0112372
chr11	41901416-41901417	0.544431	0.28241	0.262021	0.0967686	2.70771	0.00677498
chr11	114628429-114628430	0.565635	0.836725	-0.271089	0.102408	-2.64715	0.00811723
chr11	87491509-87491510	0.881797	0.647801	0.233996	0.0803349	2.91276	0.00358255
chr11	103646715-103646716	0.961792	0.739919	0.221873	0.0731476	3.03322	0.00241959
chr11	38533307-38533308	0.964718	0.759422	0.205296	0.063246	3.24599	0.00117045
chr11	32854258-32854259	0.904157	0.666145	0.238012	0.0832615	2.8586	0.00425509
chr11	36104173-36104174	0.645777	0.381582	0.264195	0.0991229	2.66533	0.00769129
chr12	49438511-49438512	0.651662	0.290874	0.360788	0.0912407	3.95425	7.6776e-05
chr12	90450355-90450356	0.759779	0.406014	0.353765	0.0909377	3.89019	0.000100167
chr12	81345172-81345173	0.836236	0.512871	0.323365	0.0921391	3.50953	0.000448899
chr12	111345581-111345582	0.996535	0.728962	0.267573	0.0701507	3.81426	0.000136592
chr12	80562601-80562602	0.858543	0.549698	0.308845	0.0930474	3.31922	0.00090268
chr12	88723349-88723350	0.0546955	0.317641	-0.262946	0.0738816	-3.55901	0.00037225
chr12	3733482-3733483	0.954019	0.695517	0.258502	0.0724032	3.57031	0.000356555
chr12	21748698-21748699	0.906487	0.628206	0.27828	0.0814988	3.41453	0.00063892
chr12	16185952-16185953	0.528088	0.830883	-0.302796	0.0932018	-3.24882	0.00115886
chr12	13752944-13752945	0.845609	0.532443	0.313165	0.0988078	3.16944	0.00152733
chr12	7905993-7905994	0.426192	0.130343	0.295849	0.0913219	3.23962	0.00119687
chr12	96216691-96216692	0.939059	0.681285	0.257774	0.0736509	3.49995	0.000465352
chr12	101388801-101388802	0.933194	0.667393	0.265801	0.0798195	3.33003	0.000868381
chr12	103408721-103408722	0.931163	0.673918	0.257245	0.0759854	3.38546	0.000710602
chr12	109442129-109442130	0.872189	0.58162	0.290568	0.0940102	3.09082	0.00199605
chr12	87294298-87294299	0.980038	0.723488	0.25655	0.0775517	3.30811	0.000939269
chr12	107954121-107954122	0.907915	0.630336	0.277579	0.0894579	3.1029	0.00191632
chr12	116642166-116642167	0.7928	0.506176	0.286624	0.0969286	2.95706	0.00310588
chr12	24566980-24566981	0.866766	0.600013	0.266753	0.0875592	3.04655	0.00231484
chr12	79453190-79453191	0.844896	0.573115	0.271781	0.0905666	3.00089	0.0026919
chr12	120009776-120009777	0.86257	0.614071	0.248499	0.0783178	3.17296	0.00150895
chr12	82104392-82104393	0.628741	0.904429	-0.275688	0.0931772	-2.95875	0.00308893
chr12	5543676-5543677	0.996678	0.775553	0.221125	0.0651901	3.392	0.000693847
chr12	104727549-104727550	0.676215	0.929867	-0.253652	0.0830341	-3.05479	0.00225216
chr12	76874633-76874634	0.767932	0.48421	0.283722	0.099354	2.85567	0.00429462
chr12	119897048-119897049	0.638001	0.352701	0.2853	0.100867	2.82849	0.00467689
chr12	52757607-52757608	0.340063	0.611276	-0.271213	0.0932454	-2.90859	0.00363064
chr12	112617315-112617316	0.844741	0.566647	0.278094	0.0974313	2.85425	0.00431384
chr12	5989208-5989209	0.820678	0.550928	0.26975	0.0928678	2.90467	0.00367645
chr12	101958732-101958733	0.596251	0.296499	0.299752	0.10944	2.73896	0.00616339
chr12	59483249-59483250	0.959855	0.740683	0.219173	0.0655647	3.34284	0.000829242
chr12	51967156-51967157	0.982191	0.768231	0.21396	0.0631616	3.38749	0.000705342
chr12	47478549-47478550	0.53554	0.244106	0.291433	0.107013	2.72335	0.0064624
chr12	69966591-69966592	0.88595	0.633723	0.252227	0.0853112	2.95655	0.003111
chr12	107205742-107205743	0.95846	0.728545	0.229915	0.0728901	3.15427	0.00160901
chr12	12225327-12225328	0.973606	0.751858	0.221748	0.069136	3.20742	0.00133932
chr12	33180245-33180246	0.901538	0.657333	0.244205	0.0824458	2.96201	0.00305636
chr12	86551482-86551483	0.769446	0.489041	0.280404	0.103622	2.70603	0.00680939
chr12	30043961-30043962	0.92236	0.685489	0.236871	0.0786508	3.01168	0.00259806
chr12	105080439-105080440	0.923253	0.691186	0.232067	0.0759995	3.05353	0.00226165
chr12	64461710-64461711	0.89453	0.640144	0.254387	0.0891314	2.85406	0.00431643
chr12	99209340-99209341	0.414157	0.709026	-0.294869	0.112649	-2.61758	0.00885546
chr12	8555054-8555055	0.976138	0.736713	0.239425	0.0814922	2.93801	0.00330323
chr12	7905962-7905963	0.45637	0.195749	0.260621	0.0953834	2.73235	0.00628842
chr12	83789231-83789232	0.948952	0.698472	0.250479	0.0899126	2.78581	0.00533947
chr12	90823616-90823617	0.548501	0.804308	-0.255806	0.0931524	-2.74611	0.00603074
chr12	44411410-44411411	0.906018	0.666476	0.239542	0.0834788	2.8695	0.00411126
chr12	90190962-90190963	0.467217	0.729974	-0.262757	0.0978016	-2.68664	0.00721751
chr12	84752392-84752393	0.798537	0.537309	0.261227	0.0970441	2.69184	0.0071059
chr12	116529760-116529761	0.939806	0.721594	0.218212	0.0711739	3.0659	0.00217016
chr12	107843702-107843703	0.861934	0.607659	0.254275	0.0934564	2.72079	0.00651262
chr12	13769253-13769254	0.701147	0.949728	-0.248581	0.0902766	-2.75355	0.00589535
chr13	39232356-39232357	0.21286	0.776369	-0.56351	0.106787	-5.27696	1.31347e-07
chr13	39759932-39759933	0.248737	0.827452	-0.578715	0.1148	-5.04108	4.62916e-07
chr13	39235377-39235378	0.269471	0.736725	-0.467254	0.116599	-4.00736	6.14016e-05
chr13	86334573-86334574	0.776782	0.389983	0.386799	0.0953069	4.05845	4.93992e-05
chr13	39299919-39299920	0.243846	0.724023	-0.480177	0.13272	-3.61797	0.000296928
chr13	61445862-61445863	0.557637	0.209479	0.348158	0.0892685	3.90012	9.61443e-05
chr13	105596870-105596871	0.165988	0.493969	-0.327981	0.092936	-3.5291	0.000416974
chr13	39257610-39257611	0.286479	0.701086	-0.414606	0.128362	-3.22997	0.00123801
chr13	85067706-85067707	0.851655	0.552792	0.298863	0.0821492	3.63806	0.000274704
chr13	42238426-42238427	0.971166	0.695845	0.275321	0.0735248	3.74461	0.000180677
chr13	4609167-4609168	0.367907	0.0132029	0.354704	0.108795	3.2603	0.00111294
chr13	73434490-73434491	0.90777	0.632863	0.274907	0.0789186	3.48342	0.000495042
chr13	38122840-38122841	0.834443	0.542186	0.292257	0.0871274	3.35436	0.000795481
chr13	112756992-112756993	0.964058	0.710695	0.253363	0.0695481	3.643	0.000269482
chr13	25592886-25592887	0.883355	0.611315	0.27204	0.0815904	3.33421	0.000855411
chr13	12474250-12474251	0.47348	0.111892	0.361587	0.12609	2.86768	0.0041349
chr13	25876225-25876226	0.817132	0.518015	0.299117	0.0985298	3.0358	0.00239897
chr13	64658172-64658173	0.981167	0.74613	0.235037	0.067108	3.50237	0.000461141
chr13	98533383-98533384	0.916939	0.642715	0.274224	0.0894099	3.06704	0.00216189
chr13	62653693-62653694	0.338511	0.638446	-0.299935	0.102906	-2.91465	0.00356093
chr13	74943358-74943359	0.82363	0.532768	0.290862	0.0995165	2.92275	0.00346955
chr13	56950099-56950100	0.670979	0.948203	-0.277224	0.0929099	-2.98379	0.002847
chr13	7079316-7079317	0.958922	0.720627	0.238295	0.0729711	3.2656	0.00109231
chr13	104179918-104179919	0.755081	0.497269	0.257812	0.0832945	3.09519	0.00196689
chr13	4608808-4608809	0.441883	0.104161	0.337722	0.126096	2.67829	0.00739988
chr13	33702441-33702442	0.691155	0.94486	-0.253705	0.0817451	-3.10361	0.00191178
chr13	49309316-49309317	0.251247	0.541736	-0.290489	0.101942	-2.84956	0.004378
chr13	12072790-12072791	0.433909	0.151451	0.282458	0.0979604	2.88339	0.00393417
chr13	33335990-33335991	0.929913	0.697811	0.232102	0.0729058	3.18359	0.00145459
chr13	76684353-76684354	0.437019	0.723073	-0.286055	0.103038	-2.77621	0.00549966
chr13	30604143-30604144	0.0780433	0.330156	-0.252112	0.0847815	-2.97367	0.00294258
chr13	44921514-44921515	0.274494	0.544256	-0.269762	0.0946482	-2.85015	0.00436981
chr13	117527236-117527237	0.84064	0.586967	0.253673	0.0860514	2.94792	0.00319916
chr13	9495152-9495153	0.381327	0.117766	0.263561	0.0917029	2.87407	0.00405215
chr13	58929637-58929638	0.902861	0.626134	0.276727	0.100418	2.75574	0.00585592
chr13	48378301-48378302	0.958051	0.710224	0.247827	0.0846496	2.92767	0.00341507
chr13	41696974-41696975	0.996424	0.782889	0.213535	0.0653157	3.26927	0.00107824
chr13	69636930-69636931	0.706591	0.430941	0.275651	0.101142	2.72539	0.0064226
chr13	39231139-39231140	0.286278	0.585836	-0.299558	0.115077	-2.60311	0.0092381
chr13	58058419-58058420	0.37917	0.120571	0.258599	0.091431	2.82835	0.00467889
chr13	93614016-93614017	0.622154	0.35387	0.268284	0.0974055	2.7543	0.00588173
chr13	43692869-43692870	0.305495	0.594086	-0.288592	0.109346	-2.63925	0.00830906
chr13	42458493-42458494	0.839693	0.594015	0.245678	0.0843864	2.91134	0.00359882
chr13	41559336-41559337	0.783136	0.512698	0.270438	0.0988094	2.73697	0.00620078
chr13	25083762-25083763	0.827427	0.562439	0.264988	0.0960725	2.75821	0.00581184
chr13	98529434-98529435	0.80984	0.557444	0.252396	0.0890416	2.83459	0.00458851
chr13	114538062-114538063	0.934009	0.70093	0.233079	0.0779302	2.99087	0.00278182
chr13	30748536-30748537	0.880479	0.630911	0.249568	0.0877363	2.84452	0.00444782
chr13	31832214-31832215	0.843466	0.595361	0.248104	0.0880666	2.81723	0.00484393
chr13	4609202-4609203	0.357723	0.0600864	0.297636	0.118169	2.51874	0.0117776
chr13	24936815-24936816	0.913606	0.680225	0.23338	0.0797394	2.92679	0.00342482
chr13	47273421-47273422	0.772337	0.501829	0.270508	0.102234	2.64598	0.00814549
chr13	109063561-109063562	0.875133	0.644751	0.230381	0.078235	2.94474	0.0032323
chr13	17944802-17944803	0.165634	0.412312	-0.246678	0.0882598	-2.7949	0.00519151
chr13	75080843-75080844	0.533546	0.789461	-0.255915	0.0945578	-2.70644	0.00680082
chr13	84569257-84569258	0.967495	0.762736	0.20476	0.0635845	3.22028	0.00128066
chr14	36870008-36870009	0.974162	0.65899	0.315172	0.0802462	3.92757	8.58099e-05
chr14	102455378-102455379	0.934293	0.633876	0.300417	0.0812009	3.69967	0.000215876
chr14	73557978-73557979	0.933722	0.626389	0.307333	0.0870962	3.52866	0.000417665
chr14	46956335-46956336	0.701741	0.353224	0.348517	0.107555	3.24035	0.00119383
chr14	68641368-68641369	0.940254	0.609015	0.331239	0.10786	3.07101	0.00213334
chr14	73599764-73599765	0.012701	0.327467	-0.314766	0.100704	-3.12565	0.00177413
chr14	33323061-33323062	0.59857	0.25944	0.33913	0.112573	3.01255	0.00259065
chr14	49081571-49081572	0.256538	0.55765	-0.301113	0.0961192	-3.1327	0.00173205
chr14	24909633-24909634	0.951844	0.698957	0.252887	0.07427	3.40496	0.000661737
chr14	60037456-60037457	0.507579	0.807555	-0.299976	0.0975224	-3.07597	0.00209819
chr14	77517895-77517896	0.953785	0.708715	0.24507	0.071546	3.42535	0.000614001
chr14	33322000-33322001	0.497323	0.799433	-0.30211	0.100387	-3.00946	0.00261708
chr14	97509360-97509361	0.560074	0.280949	0.279124	0.0916187	3.04659	0.00231455
chr14	103260254-103260255	0.105525	0.416544	-0.311019	0.108403	-2.8691	0.00411638
chr14	98026814-98026815	0.243234	0.525711	-0.282477	0.096042	-2.94119	0.00326957
chr14	86431577-86431578	0.936917	0.673184	0.263733	0.0861979	3.05962	0.00221617
chr14	113163363-113163364	0.553117	0.8257	-0.272583	0.0911288	-2.99119	0.00277894
chr14	49081577-49081578	0.27223	0.548176	-0.275946	0.0946555	-2.91527	0.00355383
chr14	34450258-34450259	0.601533	0.858033	-0.256499	0.0848744	-3.0221	0.00251025
chr14	60747444-60747445	0.860205	0.587392	0.272813	0.0939379	2.90419	0.00368206
chr14	94220307-94220308	0.683148	0.936172	-0.253024	0.0832211	-3.04038	0.00236279
chr14	32817742-32817743	0.796942	0.527626	0.269316	0.0922261	2.92017	0.00349839
chr14	70566415-70566416	0.941912	0.692361	0.249552	0.0815769	3.0591	0.00222007
chr14	33665769-33665770	0.902761	0.645208	0.257553	0.0862414	2.98642	0.00282266
chr14	22371774-22371775	0.954303	0.72321	0.231094	0.0718565	3.21604	0.00129972
chr14	20678197-20678198	0.34937	0.103962	0.245409	0.0807686	3.03842	0.00237823
chr14	17915277-17915278	0.0413873	0.26264	-0.221253	0.068574	-3.22648	0.00125323
chr14	66136678-66136679	0.222389	0.488632	-0.266243	0.094313	-2.82297	0.00475811
chr14	63721259-63721260	0.935775	0.694658	0.241117	0.080143	3.00858	0.00262471
chr14	108092475-108092476	0.90172	0.659512	0.242208	0.0808381	2.99621	0.00273357
chr14	93378578-93378579	0.611489	0.337524	0.273965	0.0989613	2.76841	0.00563314
chr14	111097646-111097647	0.995971	0.771922	0.224049	0.0705375	3.17632	0.00149159
chr14	38637465-38637466	0.605959	0.319214	0.286745	0.106635	2.68904	0.00716581
chr14	30892617-30892618	0.96492	0.71817	0.24675	0.0844185	2.92294	0.00346742
chr14	12560166-12560167	0.763214	0.469553	0.293661	0.111924	2.62377	0.00869635
chr14	119467394-119467395	0.997213	0.803456	0.193757	0.0541756	3.57646	0.000348277
chr14	118058032-118058033	0.890605	0.633514	0.257091	0.090856	2.82965	0.00465983
chr14	106753147-106753148	0.765257	0.503812	0.261445	0.0934789	2.79683	0.00516062
chr14	75550645-75550646	0.63498	0.355891	0.279089	0.103956	2.68469	0.00725976
chr14	97800524-97800525	0.883867	0.637309	0.246558	0.0851644	2.89508	0.00379056
chr14	21472727-21472728	0.91387	0.679249	0.23462	0.0784484	2.99076	0.00278284
chr14	80662786-80662787	0.913073	0.691352	0.221721	0.070967	3.12428	0.00178242
chr14	45724895-45724896	0.794311	0.529483	0.264828	0.0968239	2.73515	0.00623521
chr14	17051689-17051690	0.863097	0.621358	0.241738	0.0833181	2.90139	0.00371512
chr14	9929903-9929904	0.887461	0.654712	0.232749	0.0784009	2.9687	0.00299064
chr14	83463085-83463086	0.832516	0.579084	0.253432	0.0908236	2.79037	0.00526471
chr14	76513226-76513227	0.980557	0.768216	0.212342	0.0665187	3.19221	0.0014119
chr14	12425357-12425358	0.859582	0.606809	0.252773	0.0905004	2.79306	0.00522118
chr14	28875994-28875995	0.23479	0.503878	-0.269088	0.100231	-2.68468	0.00726002
chr14	52550656-52550657	0.907827	0.684692	0.223135	0.0730436	3.05482	0.00225194
chr14	73597149-73597150	0.0245917	0.285349	-0.260757	0.0959642	-2.71723	0.00658311
chr14	23554501-23554502	0.92869	0.696237	0.232453	0.079343	2.92972	0.0033927
chr14	119793874-119793875	0.755952	0.498121	0.257831	0.0948868	2.71725	0.00658271
chr14	70397984-70397985	0.969102	0.7481	0.221002	0.0729146	3.03096	0.00243774
chr14	109467046-109467047	0.790227	0.548822	0.241405	0.0853949	2.82692	0.00469975
chr14	78792078-78792079	0.750648	0.995901	-0.245253	0.0877452	-2.79506	0.00518896
chr14	96771766-96771767	0.913691	0.691991	0.2217	0.0735015	3.01627	0.00255908
chr14	45491149-45491150	0.944757	0.729496	0.215261	0.0697124	3.08784	0.0020162
chr14	58013350-58013351	0.687273	0.92116	-0.233887	0.0812598	-2.87827	0.00399865
chr14	20152048-20152049	0.996463	0.798447	0.198017	0.0594985	3.32809	0.000874425
chr14	50681551-50681552	0.610855	0.345316	0.265539	0.100717	2.6365	0.0083766
chr15	96958439-96958440	0.143084	0.546078	-0.402993	0.0931852	-4.32465	1.52773e-05
chr15	76035069-76035070	0.48715	0.869697	-0.382546	0.0991064	-3.85995	0.000113408
chr15	97851205-97851206	0.826999	0.4904	0.336599	0.095661	3.51867	0.000433723
chr15	96958382-96958383	0.446228	0.794831	-0.348603	0.106024	-3.28796	0.00100918
chr15	102672828-102672829	0.605492	0.905112	-0.29962	0.0855858	-3.50081	0.00046385
chr15	96954010-96954011	0.792728	0.463888	0.32884	0.100983	3.25639	0.00112838
chr15	34705525-34705526	0.833734	0.523	0.310734	0.0938731	3.31015	0.000932445
chr15	102673368-102673369	0.478959	0.778767	-0.299808	0.0901271	-3.3265	0.000879437
chr15	72865626-72865627	0.933612	0.65783	0.275781	0.0793619	3.47499	0.00051088
chr15	76987883-76987884	0.518945	0.197806	0.321139	0.10097	3.18052	0.0014701
chr15	99600766-99600767	0.925106	0.625532	0.299574	0.0911493	3.28663	0.00101395
chr15	88465168-88465169	0.857265	0.558223	0.299042	0.0916193	3.26397	0.00109864
chr15	97359502-97359503	0.910778	0.591606	0.319172	0.103099	3.09579	0.00196287
chr15	21402086-21402087	0.586232	0.884604	-0.298372	0.0969953	-3.07615	0.00209692
chr15	101285320-101285321	0.598335	0.295691	0.302644	0.100758	3.00367	0.00266747
chr15	30940239-30940240	0.787994	0.50943	0.278564	0.0891642	3.12417	0.00178307
chr15	79547209-79547210	0.0879853	0.371545	-0.28356	0.0916987	-3.0923	0.0019861
chr15	95648460-95648461	0.237763	0.607157	-0.369394	0.135535	-2.72544	0.00642158
chr15	42702896-42702897	0.897625	0.636452	0.261173	0.0810851	3.22097	0.00127756
chr15	95624689-95624690	0.168463	0.497562	-0.329099	0.115477	-2.84992	0.00437302
chr15	95184674-95184675	0.831893	0.558264	0.273629	0.0882548	3.10045	0.0019323
chr15	50840360-50840361	0.682896	0.931591	-0.248695	0.0764642	-3.25244	0.00114419
chr15	99716000-99716001	0.328333	0.061677	0.266656	0.0873765	3.05181	0.00227467
chr15	84097139-84097140	0.947673	0.712004	0.235669	0.0725099	3.25017	0.00115336
chr15	25318455-25318456	0.79614	0.52646	0.26968	0.0912041	2.95689	0.0031076
chr15	13854280-13854281	0.689715	0.410297	0.279418	0.0964518	2.89697	0.00376782
chr15	95202433-95202434	0.189466	0.492583	-0.303117	0.109648	-2.76446	0.00570171
chr15	55074021-55074022	0.657732	0.916541	-0.258809	0.0859676	-3.01054	0.00260787
chr15	83866807-83866808	0.939692	0.696708	0.242984	0.0778778	3.12007	0.00180811
chr15	48781868-48781869	0.602841	0.316364	0.286477	0.101846	2.81285	0.00491047
chr15	74826601-74826602	0.981683	0.759794	0.221889	0.0668567	3.31887	0.000903833
chr15	92772972-92772973	0.187357	0.470524	-0.283167	0.101211	-2.79779	0.00514531
chr15	94771806-94771807	0.640992	0.899798	-0.258806	0.0879426	-2.94289	0.00325161
chr15	10091905-10091906	0.517046	0.234888	0.282157	0.101258	2.78651	0.00532783
chr15	89144702-89144703	0.486992	0.761972	-0.27498	0.0977319	-2.81361	0.00489882
chr15	30702071-30702072	0.937049	0.710707	0.226342	0.07115	3.1812	0.00146669
chr15	83057679-83057680	0.919873	0.6725	0.247373	0.0835517	2.96072	0.00306923
chr15	87968257-87968258	0.630727	0.906883	-0.276155	0.100203	-2.75596	0.00585209
chr15	12353949-12353950	0.653718	0.899621	-0.245902	0.0829687	-2.9638	0.00303869
chr15	75893359-75893360	0.182498	0.45926	-0.276762	0.101781	-2.71919	0.00654415
chr15	94234382-94234383	0.892448	0.647596	0.244852	0.083433	2.93471	0.00333859
chr15	92161731-92161732	0.942127	0.700557	0.24157	0.0815944	2.96061	0.00307026
chr15	25356298-25356299	0.699906	0.941811	-0.241906	0.0822585	-2.9408	0.00327368
chr15	77098269-77098270	0.720883	0.947557	-0.226674	0.0737637	-3.07298	0.00211934
chr15	74074097-74074098	0.903038	0.667695	0.235342	0.0793192	2.96703	0.00300692
chr15	35325870-35325871	0.649101	0.366252	0.282848	0.107513	2.63083	0.00851772
chr15	69327628-69327629	0.726473	0.462525	0.263948	0.0966068	2.73218	0.0062916
chr15	58361968-58361969	0.922587	0.681094	0.241493	0.0834211	2.89486	0.00379323
chr15	78642911-78642912	0.896065	0.644793	0.251272	0.089662	2.80244	0.00507182
chr15	72865588-72865589	0.972533	0.758732	0.213801	0.0675781	3.16376	0.00155743
chr15	5495464-5495465	0.871441	0.63962	0.231821	0.0785298	2.95202	0.00315708
chr15	99651973-99651974	0.793664	0.542189	0.251475	0.0904616	2.77991	0.00543737
chr15	10502233-10502234	0.925288	0.690059	0.235229	0.0807448	2.91324	0.00357697
chr15	102673288-102673289	0.667383	0.90386	-0.236476	0.0816497	-2.89623	0.00377675
chr15	102672938-102672939	0.615735	0.873802	-0.258067	0.0946437	-2.72672	0.00639674
chr15	59012455-59012456	0.0763806	0.311452	-0.235072	0.0809931	-2.90237	0.00370354
chr15	39751207-39751208	0.247921	0.50837	-0.260448	0.096353	-2.70306	0.00687034
chr15	96958368-96958369	0.508228	0.785347	-0.277119	0.106433	-2.60368	0.00922278
chr15	35349420-35349421	0.839201	0.587494	0.251707	0.0912016	2.7599	0.00578197
chr15	32343863-32343864	0.817952	0.570205	0.247746	0.0888857	2.78724	0.00531586
chr15	7743409-7743410	0.962787	0.733118	0.229669	0.0780333	2.94322	0.00324819
chr15	78019655-78019656	0.970138	0.751114	0.219024	0.0719308	3.04493	0.00232736
chr15	95675970-95675971	0.650504	0.891541	-0.241037	0.08532	-2.82509	0.00472668
chr15	78583078-78583079	0.0986294	0.337297	-0.238668	0.0839747	-2.84214	0.00448118
chr16	36665894-36665895	0.934972	0.623292	0.311679	0.0853187	3.65312	0.000259074
chr16	44769470-44769471	0.454929	0.781773	-0.326844	0.0940117	-3.47663	0.000507762
chr16	95901701-95901702	0.887321	0.602945	0.284375	0.0794113	3.58104	0.000342223
chr16	58483325-58483326	0.997166	0.760952	0.236213	0.0617506	3.82528	0.000130623
chr16	35742300-35742301	0.841833	0.54757	0.294263	0.0894649	3.28914	0.00100492
chr16	46087176-46087177	0.773693	0.463912	0.309781	0.0968156	3.1997	0.00137571
chr16	14703897-14703898	0.426155	0.738545	-0.31239	0.100503	-3.10825	0.00188197
chr16	6075828-6075829	0.996966	0.768212	0.228754	0.0623908	3.66648	0.000245915
chr16	35683458-35683459	0.996983	0.764167	0.232817	0.0654351	3.55798	0.000373715
chr16	74376680-74376681	0.932223	0.684696	0.247527	0.0735002	3.3677	0.000757967
chr16	27079811-27079812	0.396589	0.712089	-0.315501	0.109853	-2.87203	0.0040784
chr16	33951717-33951718	0.82708	0.562974	0.264105	0.0840465	3.14237	0.00167584
chr16	18597167-18597168	0.833421	0.534271	0.29915	0.103144	2.9003	0.00372805
chr16	76649873-76649874	0.841797	0.576963	0.264834	0.0858703	3.08411	0.00204159
chr16	11354720-11354721	0.932851	0.680357	0.252494	0.0800422	3.15451	0.00160767
chr16	58107973-58107974	0.833152	0.570728	0.262424	0.0853874	3.07334	0.0021168
chr16	8504764-8504765	0.793421	0.51274	0.280681	0.0950176	2.95399	0.00313697
chr16	24166060-24166061	0.845554	0.563787	0.281767	0.096465	2.92093	0.00348991
chr16	80434807-80434808	0.919069	0.687494	0.231575	0.0703267	3.29285	0.000991777
chr16	14140395-14140396	0.757117	0.49143	0.265687	0.0897941	2.95885	0.00308791
chr16	63622757-63622758	0.299484	0.572743	-0.273259	0.0939473	-2.90864	0.00363007
chr16	56262198-56262199	0.97955	0.753933	0.225617	0.068188	3.30875	0.000937132
chr16	29950323-29950324	0.781942	0.498154	0.283788	0.100954	2.81105	0.00493803
chr16	21678394-21678395	0.958774	0.728987	0.229787	0.0720559	3.189	0.00142764
chr16	10483723-10483724	0.957424	0.734135	0.223289	0.0694261	3.21621	0.00129897
chr16	44594441-44594442	0.964	0.746703	0.217297	0.0663827	3.2734	0.00106263
chr16	11046664-11046665	0.511789	0.795547	-0.283758	0.104171	-2.72396	0.00645046
chr16	89556526-89556527	0.401048	0.687379	-0.28633	0.106734	-2.68265	0.00730413
chr16	38341521-38341522	0.971674	0.748472	0.223202	0.0705939	3.16178	0.00156809
chr16	62941836-62941837	0.720635	0.44608	0.274555	0.100205	2.73994	0.00614503
chr16	22962279-22962280	0.739005	0.472702	0.266303	0.096129	2.77026	0.00560108
chr16	31058994-31058995	0.612406	0.878067	-0.265661	0.0977879	-2.71671	0.00659344
chr16	4616550-4616551	0.848466	0.593794	0.254672	0.0915932	2.78046	0.00542811
chr16	58613856-58613857	0.895671	0.663602	0.232069	0.0782384	2.96618	0.00301523
chr16	18013740-18013741	0.718867	0.444948	0.273919	0.103369	2.64992	0.00805113
chr16	47600760-47600761	0.88904	0.634933	0.254108	0.0916167	2.7736	0.00554403
chr16	30023619-30023620	0.974863	0.759355	0.215508	0.0692334	3.11278	0.00185333
chr16	59600019-59600020	0.412882	0.153969	0.258914	0.0954341	2.71301	0.00666755
chr16	42791656-42791657	0.799353	0.5575	0.241853	0.0854585	2.83006	0.00465389
chr16	20409398-20409399	0.867934	0.628056	0.239877	0.0843323	2.84443	0.00444908
chr16	92289779-92289780	0.701358	0.430495	0.270864	0.103128	2.62648	0.0086273
chr16	38664573-38664574	0.633009	0.380911	0.252098	0.092285	2.73173	0.00630031
chr17	46581062-46581063	0.83589	0.451346	0.384544	0.0950517	4.04563	5.21831e-05
chr17	86437508-86437509	0.486635	0.142091	0.344544	0.0945372	3.64454	0.000267875
chr17	25672896-25672897	0.903448	0.56978	0.333668	0.0908803	3.67151	0.000241121
chr17	66325705-66325706	0.630754	0.283174	0.34758	0.105217	3.30345	0.000955018
chr17	15058840-15058841	0.806084	0.490799	0.315286	0.0925826	3.40545	0.000660549
chr17	38520287-38520288	0.945489	0.679594	0.265895	0.0726988	3.65749	0.000254696
chr17	23802469-23802470	0.220691	0.530675	-0.309985	0.0961422	-3.22423	0.00126311
chr17	38974857-38974858	0.733672	0.421565	0.312108	0.098294	3.17525	0.0014971
chr17	74995067-74995068	0.773974	0.466763	0.307211	0.0967407	3.17561	0.00149522
chr17	46043051-46043052	0.88798	0.608306	0.279674	0.0888021	3.1494	0.00163604
chr17	65154273-65154274	0.86587	0.599033	0.266836	0.0838224	3.18335	0.0014558
chr17	9312104-9312105	0.830943	0.550878	0.280065	0.0906111	3.09085	0.00199588
chr17	47812736-47812737	0.980356	0.735136	0.24522	0.0731677	3.35148	0.000803816
chr17	47764167-47764168	0.070458	0.389148	-0.31869	0.111145	-2.86734	0.00413936
chr17	78834260-78834261	0.912889	0.629435	0.283455	0.094524	2.99876	0.00271084
chr17	23523249-23523250	0.585979	0.29259	0.293389	0.100041	2.93268	0.00336054
chr17	92031496-92031497	0.862623	0.598756	0.263867	0.0856758	3.07984	0.00207115
chr17	72862818-72862819	0.870129	0.606927	0.263202	0.0867725	3.03325	0.00241938
chr17	36927956-36927957	0.465546	0.181984	0.283562	0.100135	2.83181	0.0046286
chr17	36589035-36589036	0.995735	0.781348	0.214388	0.0627237	3.41797	0.000630897
chr17	35821239-35821240	0.39899	0.138282	0.260708	0.0895215	2.91224	0.00358852
chr17	47284282-47284283	0.949261	0.710203	0.239058	0.0776661	3.07803	0.00208377
chr17	48784903-48784904	0.979674	0.762419	0.217255	0.0658126	3.30111	0.000963021
chr17	64824669-64824670	0.97933	0.775127	0.204203	0.0591748	3.45084	0.000558848
chr17	67071505-67071506	0.132269	0.394842	-0.262573	0.0935248	-2.80753	0.00499236
chr17	65648293-65648294	0.820581	0.550896	0.269685	0.0976374	2.76211	0.00574287
chr17	9946972-9946973	0.487503	0.75923	-0.271727	0.0990765	-2.7426	0.0060955
chr17	67071575-67071576	0.0805007	0.314038	-0.233537	0.0771849	-3.02569	0.00248068
chr17	16950975-16950976	0.395172	0.13777	0.257402	0.0920168	2.79734	0.0051525
chr17	69046647-69046648	0.951013	0.727009	0.224003	0.073135	3.06287	0.00219223
chr17	23566178-23566179	0.925978	0.69705	0.228928	0.0761228	3.00735	0.00263532
chr17	73055993-73055994	0.887842	0.638926	0.248915	0.0881285	2.82446	0.00473602
chr17	30833183-30833184	0.840278	0.589457	0.25082	0.0895402	2.8012	0.00509122
chr17	84657999-84658000	0.893024	0.648788	0.244236	0.0862018	2.8333	0.00460702
chr17	79949851-79949852	0.89833	0.652338	0.245992	0.0872583	2.81913	0.0048154
chr17	54043422-54043423	0.663463	0.414971	0.248491	0.0890035	2.79193	0.00523951
chr17	22009071-22009072	0.493561	0.75265	-0.25909	0.0961143	-2.69564	0.00702532
chr17	12842891-12842892	0.349401	0.624148	-0.274747	0.105711	-2.59905	0.00934828
chr17	85419322-85419323	0.952006	0.74216	0.209846	0.0667651	3.14305	0.00167195
chr18	84228583-84228584	0.792175	0.355244	0.436931	0.112827	3.87258	0.00010769
chr18	63961584-63961585	0.906497	0.600148	0.306349	0.0791023	3.87282	0.000107582
chr18	36955458-36955459	0.190091	0.508159	-0.318068	0.0848028	-3.75068	0.000176357
chr18	77835506-77835507	0.996901	0.746408	0.250494	0.0619346	4.04449	5.24365e-05
chr18	81446890-81446891	0.997472	0.675085	0.322388	0.0930324	3.46533	0.00052959
chr18	25058730-25058731	0.978308	0.727074	0.251234	0.0647553	3.87975	0.000104565
chr18	23877040-23877041	0.471131	0.811314	-0.340183	0.104051	-3.26937	0.00107787
chr18	81030095-81030096	0.862126	0.558302	0.303824	0.0884254	3.43594	0.000590505
chr18	75824861-75824862	0.88898	0.587423	0.301557	0.09128	3.30365	0.000954348
chr18	85555044-85555045	0.108184	0.404184	-0.296	0.0904739	-3.27166	0.00106917
chr18	54985761-54985762	0.597468	0.286471	0.310997	0.0976701	3.18416	0.00145175
chr18	80040385-80040386	0.156791	0.456124	-0.299332	0.0930549	-3.21673	0.00129661
chr18	81649721-81649722	0.575627	0.878043	-0.302415	0.095969	-3.15118	0.00162614
chr18	80486283-80486284	0.722705	0.400984	0.321722	0.105641	3.04543	0.00232352
chr18	78327664-78327665	0.708056	0.377277	0.330779	0.113585	2.91217	0.00358925
chr18	62865529-62865530	0.942509	0.6812	0.261309	0.0795432	3.28512	0.00101938
chr18	85278580-85278581	0.652752	0.932162	-0.27941	0.089466	-3.12309	0.00178965
chr18	81215539-81215540	0.883921	0.591299	0.292622	0.0982138	2.97944	0.00288778
chr18	74008138-74008139	0.723062	0.434146	0.288916	0.0971179	2.9749	0.00293082
chr18	81361320-81361321	0.796531	0.48222	0.314311	0.110553	2.84308	0.00446805
chr18	50096965-50096966	0.910148	0.641309	0.268839	0.0886737	3.03178	0.00243114
chr18	46109647-46109648	0.748791	0.456455	0.292337	0.1012	2.88869	0.00386845
chr18	4980482-4980483	0.355302	0.0862175	0.269085	0.089215	3.01614	0.00256018
chr18	34409008-34409009	0.253549	0.532201	-0.278651	0.096858	-2.8769	0.00401597
chr18	68668516-68668517	0.800648	0.48623	0.314418	0.117443	2.67721	0.00742387
chr18	75299522-75299523	0.951947	0.717685	0.234262	0.0742704	3.15417	0.00160953
chr18	65580371-65580372	0.285962	0.562117	-0.276155	0.0983247	-2.8086	0.00497567
chr18	80240342-80240343	0.739179	0.456987	0.282192	0.101897	2.76938	0.00561624
chr18	35834325-35834326	0.0659334	0.338144	-0.272211	0.0971714	-2.80135	0.00508897
chr18	68662493-68662494	0.933056	0.645634	0.287422	0.106409	2.70111	0.00691094
chr18	33066191-33066192	0.787896	0.534251	0.253645	0.0875201	2.89814	0.00375385
chr18	57454468-57454469	0.689437	0.413081	0.276355	0.100632	2.7462	0.00602908
chr18	61173278-61173279	0.936982	0.694061	0.242921	0.0817703	2.97078	0.00297048
chr18	6010323-6010324	0.910928	0.674904	0.236023	0.0779149	3.02924	0.00245166
chr18	13728117-13728118	0.72103	0.44194	0.27909	0.103713	2.69098	0.00712435
chr18	38408632-38408633	0.936895	0.715648	0.221247	0.0704574	3.14016	0.00168858
chr18	21818185-21818186	0.586867	0.316933	0.269934	0.099403	2.71555	0.00661655
chr18	66673026-66673027	0.908215	0.663623	0.244591	0.0848543	2.88249	0.00394548
chr18	66345505-66345506	0.775464	0.508988	0.266475	0.0981245	2.71569	0.00661386
chr18	7705763-7705764	0.861275	0.621277	0.239998	0.0826139	2.90506	0.00367186
chr18	77571192-77571193	0.658657	0.386618	0.272038	0.103677	2.62389	0.00869317
chr19	29149758-29149759	0.471991	0.0996289	0.372362	0.0951136	3.91492	9.04345e-05
chr19	16369944-16369945	0.286703	0.67145	-0.384747	0.10403	-3.69841	0.000216953
chr19	45296572-45296573	0.932648	0.636761	0.295887	0.0770834	3.83853	0.000123774
chr19	55970428-55970429	0.812596	0.488455	0.324141	0.100523	3.22454	0.00126176
chr19	22754879-22754880	0.864613	0.564506	0.300107	0.0949235	3.16157	0.0015692
chr19	52045047-52045048	0.316771	0.621123	-0.304352	0.100382	-3.03194	0.00242988
chr19	30167202-30167203	0.914528	0.653187	0.261341	0.0837324	3.12114	0.00180153
chr19	18582986-18582987	0.893994	0.632126	0.261868	0.0847179	3.09105	0.00199448
chr19	42124995-42124996	0.554139	0.856946	-0.302807	0.106517	-2.84279	0.004472
chr19	55051537-55051538	0.888503	0.624786	0.263717	0.0882712	2.98758	0.00281199
chr19	19162831-19162832	0.714158	0.969185	-0.255027	0.0838122	-3.04284	0.00234358
chr19	7744008-7744009	0.954956	0.721464	0.233492	0.0727495	3.20953	0.00132952
chr19	41636959-41636960	0.645187	0.904282	-0.259095	0.0892039	-2.90453	0.0036781
chr19	29509304-29509305	0.582271	0.841594	-0.259323	0.0918023	-2.8248	0.004731
chr19	18844393-18844394	0.794803	0.525121	0.269682	0.0979773	2.7525	0.00591423
chr19	46998966-46998967	0.730059	0.451304	0.278755	0.10328	2.69902	0.00695435
chr19	47563886-47563887	0.972633	0.746878	0.225755	0.0731617	3.0857	0.00203076
chr19	50878179-50878180	0.963264	0.731444	0.23182	0.0766966	3.02256	0.00250647
chr19	56741700-56741701	0.957305	0.729021	0.228284	0.0751457	3.03789	0.00238242
chr19	60144996-60144997	0.83487	0.584975	0.249895	0.0880733	2.83735	0.00454896
chr19	60015237-60015238	0.854514	0.60021	0.254304	0.0910557	2.79284	0.00522473
chr19	43325443-43325444	0.99711	0.801218	0.195893	0.0569017	3.44265	0.000576044
chr19	14756985-14756986	0.810491	0.549058	0.261433	0.0962464	2.71629	0.00660183
chr19	33435030-33435031	0.557195	0.838899	-0.281704	0.109533	-2.57186	0.0101155
chr19	38458552-38458553	0.89309	0.658475	0.234614	0.0814813	2.87936	0.00398477
chrX	128004275-128004276	0.585667	0.102042	0.483625	0.0914196	5.29017	1.22203e-07
chrX	103686346-103686347	0.592984	0.92006	-0.327076	0.0789461	-4.14303	3.42752e-05
chrX	101044390-101044391	0.143962	0.468227	-0.324266	0.0878584	-3.69077	0.000223572
chrX	9740182-9740183	0.92248	0.635306	0.287174	0.080518	3.56658	0.000361665
chrX	94091282-94091283	0.155949	0.436206	-0.280257	0.0820809	-3.4144	0.000639219
chrX	170005417-170005418	0.769258	0.477385	0.291873	0.0897626	3.25161	0.00114752
chrX	77721267-77721268	0.353428	0.0940149	0.259413	0.0766293	3.38529	0.000711022
chrX	12458821-12458822	0.82942	0.547818	0.281602	0.0887396	3.17335	0.00150688
chrX	106195131-106195132	0.912628	0.655982	0.256646	0.0798206	3.21529	0.00130313
chrX	100238410-100238411	0.635163	0.8877	-0.252537	0.078936	-3.19926	0.0013778
chrX	143934726-143934727	0.960029	0.729259	0.23077	0.0709935	3.25058	0.00115169
chrX	99529817-99529818	0.961423	0.735013	0.22641	0.0690141	3.28064	0.00103573
chrX	130354272-130354273	0.863028	0.617805	0.245223	0.0793685	3.08968	0.00200374
chrX	104490561-104490562	0.644961	0.892502	-0.24754	0.0810348	-3.05474	0.00225254
chrX	105463782-105463783	0.933819	0.710154	0.223665	0.0696319	3.21211	0.00131765
chrX	60674390-60674391	0.77874	0.505953	0.272787	0.0980872	2.78106	0.00541809
chrX	12515876-12515877	0.962	0.737165	0.224835	0.0711725	3.15902	0.00158302
chrX	143000313-143000314	0.903375	0.673478	0.229896	0.0755491	3.043	0.00234232
chrX	48127752-48127753	0.765147	0.498621	0.266526	0.0975665	2.73174	0.00630017
chrX	12762953-12762954	0.482136	0.228942	0.253194	0.090279	2.80457	0.00503837
chrX	157382947-157382948	0.536094	0.7894	-0.253306	0.0903856	-2.80251	0.00507067
chrX	91248566-91248567	0.89296	0.667155	0.225804	0.0745866	3.02741	0.00246657
chrX	164540949-164540950	0.46325	0.213616	0.249635	0.0887482	2.81284	0.00491054
chrX	150323337-150323338	0.936601	0.717094	0.219507	0.071099	3.08734	0.00201953
chrX	142517034-142517035	0.625473	0.364758	0.260715	0.0969744	2.6885	0.00717744

## Sheet: C- vs C+ DMRs
chr	start	end	length	nCG	C- methylation	C+ methylation	methylation difference	areaStat
chr1	132514268	132514318	51	3	0.879489	0.741418	0.13807	5.4955
chr1	186967783	186968288	506	4	0.764519	0.953487	-0.188968	-9.15086
chr2	32854232	32854578	347	3	0.256526	0.0725231	0.184003	6.69461
chr2	38824815	38825582	768	10	0.372052	0.139289	0.232763	30.0571
chr2	40385103	40385221	119	3	0.961809	0.816419	0.14539	6.83883
chr2	90744683	90745030	348	4	0.208719	0.397376	-0.188657	-10.2668
chr2	92812367	92813250	884	4	0.698602	0.592992	0.10561	5.265
chr2	141251748	141252718	971	3	0.905832	0.750596	0.155235	6.54336
chr2	172468721	172468777	57	3	0.997021	0.893997	0.103024	6.7346
chr3	42171124	42176017	4894	3	0.899044	0.745932	0.153112	6.38878
chr3	59262291	59262847	557	7	0.519528	0.190296	0.329232	20.7256
chr3	84740312	84740470	159	5	0.775053	0.570232	0.20482	11.1834
chr3	96306329	96306741	413	3	0.767868	0.59433	0.173538	6.69231
chr3	98427737	98427883	147	7	0.0413702	0.242769	-0.201399	-17.1719
chr3	102692410	102693276	867	3	0.788448	0.638637	0.149811	6.53548
chr3	119166042	119166098	57	3	0.341276	0.126766	0.21451	7.66018
chr3	125724679	125724847	169	3	0.799824	0.929668	-0.129844	-5.96204
chr3	129224819	129224967	149	10	0.213184	0.0492877	0.163896	22.8485
chr3	136862393	136862607	215	3	0.832609	0.955646	-0.123037	-6.75761
chr3	138227795	138228337	543	3	0.49007	0.709345	-0.219275	-7.29819
chr3	138751642	138753436	1795	3	0.626176	0.366706	0.25947	7.74283
chr3	150944406	150944695	290	3	0.59782	0.347382	0.250438	8.34059
chr4	45771278	45771434	157	3	0.730695	0.515226	0.215469	7.13429
chr4	53439591	53439694	104	4	0.371691	0.586824	-0.215133	-10.0479
chr4	60115493	60115604	112	3	0.702464	0.520951	0.181513	6.77154
chr4	100822626	100822681	56	3	0.964551	0.826856	0.137695	6.93728
chr4	126058044	126058110	67	5	0.017012	0.12141	-0.104398	-10.6231
chr4	148233072	148233239	168	4	0.844976	0.707281	0.137695	7.31264
chr5	76842342	76843178	837	3	0.747791	0.573613	0.174178	6.20526
chr5	90510755	90511510	756	3	0.701483	0.484603	0.21688	7.36776
chr5	104511192	104511400	209	3	0.73255	0.925887	-0.193337	-7.57436
chr5	133671725	133674414	2690	4	0.967364	0.827166	0.140198	9.03687
chr6	6056307	6056374	68	3	0.796751	0.956355	-0.159604	-7.07307
chr6	6280470	6280623	154	3	0.991036	0.858781	0.132255	7.94386
chr6	53720423	53720822	400	3	0.887626	0.709884	0.177742	6.85961
chr6	86473032	86473380	349	5	0.291447	0.650266	-0.358819	-19.691
chr6	141866298	141867172	875	3	0.405999	0.59849	-0.192491	-6.50512
chr6	148354288	148356071	1783	13	0.507498	0.752438	-0.24494	-40.446
chr7	67129778	67130078	301	4	0.957557	0.82149	0.136067	9.39082
chr7	96441923	96443744	1822	4	0.95761	0.804774	0.152836	9.87136
chr8	19984974	19986553	1579	6	0.940794	0.786781	0.154013	15.6651
chr8	20003648	20006487	2839	7	0.940886	0.720166	0.22072	23.3554
chr8	28915243	28918307	3065	3	0.503423	0.610082	-0.10666	-2.90609
chr8	35088256	35089210	955	7	0.935057	0.676534	0.258523	19.8566
chr8	69328636	69329144	509	3	0.169825	0.0118266	0.157998	7.08728
chr8	77451597	77451653	57	3	0.961755	0.804878	0.156876	7.16339
chr8	93226332	93227169	838	4	0.536944	0.855509	-0.318564	-14.7657
chr8	114128698	114128962	265	3	0.254196	0.629926	-0.375731	-12.4534
chr8	122268630	122269196	567	8	0.40726	0.649897	-0.242638	-20.4129
chr9	58545549	58545610	62	3	0.9633	0.839292	0.124008	6.39124
chr9	112123304	112123593	290	3	0.452403	0.641662	-0.189259	-6.8885
chr10	18591152	18591808	657	3	0.569501	0.798393	-0.228892	-6.81974
chr10	121096062	121096435	374	3	0.888443	0.708779	0.179664	7.04098
chr10	125968303	125968471	169	4	0.716272	0.421311	0.294961	13.4518
chr10	127514110	127515587	1478	3	0.788741	0.596679	0.192061	6.91802
chr11	40395673	40396079	407	3	0.924929	0.72735	0.197579	7.66133
chr11	87404940	87405259	320	6	0.57753	0.898287	-0.320758	-22.0059
chr11	90262945	90263071	127	3	0.969423	0.797248	0.172176	7.49321
chr11	118315567	118316553	987	3	0.892789	0.736869	0.15592	6.33189
chr12	29376610	29376774	165	3	0.907895	0.763379	0.144516	6.87097
chr12	76536027	76536156	130	4	0.32351	0.112771	0.210739	9.40952
chr12	84417741	84417905	165	3	0.452588	0.650163	-0.197575	-7.20503
chr12	116404565	116404760	196	3	0.64282	0.873953	-0.231133	-7.82231
chr13	55209657	55210035	379	11	0.477304	0.929757	-0.452453	-57.798
chr13	105596480	105596906	427	3	0.72149	0.483081	0.238409	7.86513
chr13	111803234	111803306	73	3	0.398401	0.18014	0.218261	7.26707
chr14	24172077	24172146	70	3	0.64406	0.870992	-0.226932	-7.7342
chr14	31661725	31661973	249	18	0.0461555	0.218396	-0.172241	-44.2324
chr14	54960320	54961120	801	3	0.990585	0.858339	0.132246	6.7326
chr14	101947089	101947304	216	3	0.39039	0.677815	-0.287425	-9.04822
chr15	76721097	76721562	466	3	0.503726	0.167648	0.336078	10.1838
chr15	77378352	77378511	160	3	0.569536	0.902094	-0.332558	-11.2411
chr15	78554533	78555422	890	3	0.564897	0.787053	-0.222156	-7.681
chr15	87190182	87190322	141	5	0.721976	0.889248	-0.167272	-10.5673
chr16	45843688	45844009	322	3	0.453299	0.170841	0.282458	9.52643
chr16	78949797	78950380	584	3	0.901857	0.751793	0.150064	6.14339
chr16	87454505	87454611	106	3	0.0256211	0.18301	-0.157389	-8.11527
chr16	89830527	89830619	93	3	0.884125	0.659072	0.225052	7.97243
chr16	93874852	93875002	151	4	0.43471	0.204306	0.230404	10.4106
chr17	23802469	23802649	181	3	0.0381622	0.291714	-0.253552	-10.5772
chr17	27133191	27133336	146	3	0.767847	0.934062	-0.166215	-7.06125
chr17	30158103	30158294	192	3	0.929967	0.763635	0.166332	7.18386
chr17	30205256	30205320	65	4	0.939702	0.726919	0.212783	10.7485
chr17	47788887	47788941	55	3	0.991232	0.865699	0.125533	6.91598
chr17	66364166	66364281	116	4	0.709333	0.946161	-0.236829	-11.5073
chr18	65024115	65024443	329	3	0.737988	0.486837	0.251151	8.17118
chr18	65213212	65213706	495	3	0.550786	0.837727	-0.286942	-10.9934
chr18	65579933	65580371	439	3	0.456617	0.783443	-0.326825	-11.6595
chr18	66861899	66862383	485	3	0.359816	0.15823	0.201587	7.96352
chr19	30029147	30029922	776	6	0.539538	0.801162	-0.261623	-17.9749
chr19	42785679	42786065	387	3	0.708472	0.514286	0.194186	7.4547
chr19	48136820	48137869	1050	3	0.887284	0.723636	0.163649	6.68948
chr19	55469993	55470095	103	4	0.325782	0.132688	0.193094	9.27201
chrX	43207748	43208806	1059	3	0.752081	0.930983	-0.178902	-6.80004
chrX	170005173	170005417	245	3	0.678784	0.471204	0.20758	7.13902

## Sheet: C- vs C+ DMCs
chr	position	C- methylation	C+ methylation	methylation difference	diff.se	stat	p-value
chr1	186967783-186967784	0.385947	0.849007	-0.46306	0.107966	-4.28893	1.79539e-05
chr1	188906058-188906059	0.817018	0.454506	0.362512	0.0975358	3.71671	0.000201835
chr1	12416713-12416714	0.633522	0.305413	0.328109	0.0898913	3.65006	0.000262182
chr1	166259183-166259184	0.534404	0.851257	-0.316853	0.0857687	-3.69427	0.000220521
chr1	183845182-183845183	0.823661	0.507928	0.315733	0.0865731	3.64701	0.000265312
chr1	15794446-15794447	0.795619	0.466685	0.328934	0.0920087	3.57503	0.000350186
chr1	87758097-87758098	0.862467	0.569806	0.29266	0.0797212	3.67105	0.000241557
chr1	58611218-58611219	0.651646	0.344523	0.307123	0.0889093	3.45434	0.000551648
chr1	176588515-176588516	0.549716	0.230613	0.319103	0.0946592	3.37107	0.000748774
chr1	30541854-30541855	0.884504	0.588818	0.295686	0.085603	3.45415	0.00055203
chr1	63853328-63853329	0.997933	0.719349	0.278584	0.0794409	3.50681	0.000453513
chr1	177311600-177311601	0.913083	0.622181	0.290902	0.085583	3.39906	0.000676174
chr1	140176762-140176763	0.400342	0.116355	0.283987	0.0832041	3.41313	0.000642205
chr1	61138929-61138930	0.817785	0.524808	0.292977	0.0882617	3.31941	0.000902072
chr1	14919454-14919455	0.169196	0.467279	-0.298083	0.0915528	-3.25586	0.0011305
chr1	56196838-56196839	0.854751	0.577942	0.276809	0.0817773	3.38492	0.000711992
chr1	71099956-71099957	0.411079	0.728826	-0.317746	0.101231	-3.13884	0.00169618
chr1	189784829-189784830	0.78813	0.480628	0.307502	0.0964693	3.18757	0.00143476
chr1	40888309-40888310	0.781887	0.473989	0.307898	0.0974255	3.16034	0.00157585
chr1	11830699-11830700	0.341418	0.0169372	0.324481	0.105215	3.08396	0.00204264
chr1	189422509-189422510	0.892303	0.598944	0.293359	0.0913575	3.21111	0.00132222
chr1	39196378-39196379	0.54428	0.252892	0.291388	0.0909518	3.20377	0.00135642
chr1	25303247-25303248	0.603185	0.296018	0.307167	0.0998478	3.07635	0.00209552
chr1	142116913-142116914	0.612519	0.299482	0.313036	0.1029	3.04215	0.00234895
chr1	78537831-78537832	0.453532	0.152037	0.301495	0.0975157	3.09176	0.00198972
chr1	166297898-166297899	0.861949	0.58548	0.276469	0.085802	3.22218	0.0012722
chr1	79462916-79462917	0.508712	0.810218	-0.301506	0.0984897	-3.06129	0.00220382
chr1	102781250-102781251	0.789861	0.513914	0.275947	0.0860323	3.20748	0.00133904
chr1	53165185-53165186	0.516649	0.812448	-0.295799	0.0964879	-3.06566	0.00217189
chr1	55751319-55751320	0.742048	0.438695	0.303352	0.100631	3.01452	0.0025739
chr1	21838743-21838744	0.68023	0.38753	0.292701	0.0957488	3.05697	0.00223589
chr1	81029366-81029367	0.517343	0.246536	0.270807	0.0857529	3.15799	0.00158859
chr1	27911409-27911410	0.805775	0.535603	0.270172	0.086081	3.13858	0.00169769
chr1	131963727-131963728	0.385798	0.0980235	0.287774	0.0950878	3.0264	0.00247481
chr1	75585962-75585963	0.849362	0.561987	0.287375	0.0949485	3.02664	0.00247291
chr1	158853975-158853976	0.930663	0.672867	0.257795	0.0801439	3.21665	0.00129694
chr1	43316755-43316756	0.968686	0.714291	0.254395	0.0787781	3.22927	0.00124109
chr1	119985340-119985341	0.914018	0.651617	0.262401	0.0836144	3.13823	0.00169971
chr1	56701372-56701373	0.833221	0.534479	0.298742	0.102422	2.91677	0.00353674
chr1	189963604-189963605	0.876167	0.609681	0.266485	0.0866412	3.07574	0.00209984
chr1	41208260-41208261	0.675324	0.383058	0.292266	0.100209	2.91658	0.00353895
chr1	55469540-55469541	0.896722	0.636352	0.26037	0.0837646	3.10836	0.00188131
chr1	31610478-31610479	0.875475	0.630984	0.244492	0.0756908	3.23013	0.00123733
chr1	36100032-36100033	0.904908	0.642265	0.262643	0.0852972	3.07915	0.00207591
chr1	74096669-74096670	0.933295	0.678944	0.254351	0.0811027	3.13617	0.00171173
chr1	66672365-66672366	0.997364	0.787431	0.209934	0.0578252	3.63049	0.000282889
chr1	161176194-161176195	0.580874	0.840525	-0.259651	0.0840565	-3.08901	0.00200827
chr1	14305771-14305772	0.864839	0.619189	0.24565	0.0769226	3.19347	0.00140574
chr1	186663100-186663101	0.711052	0.419578	0.291473	0.101634	2.86787	0.00413249
chr1	115551623-115551624	0.958058	0.709934	0.248124	0.0789089	3.14444	0.00166404
chr1	6220099-6220100	0.699732	0.956298	-0.256567	0.083994	-3.05458	0.00225373
chr1	3751434-3751435	0.72262	0.445048	0.277572	0.0954008	2.90953	0.00361974
chr1	89258610-89258611	0.43081	0.134812	0.295998	0.105459	2.80676	0.0050043
chr1	185651883-185651884	0.777678	0.520622	0.257056	0.084592	3.03878	0.00237541
chr1	159684568-159684569	0.914974	0.661133	0.253842	0.0832922	3.04761	0.00230671
chr1	118162034-118162035	0.560394	0.286251	0.274142	0.0944211	2.9034	0.00369132
chr1	177453480-177453481	0.850603	0.573448	0.277155	0.0963191	2.87747	0.00400878
chr1	73088492-73088493	0.441427	0.176293	0.265134	0.0904119	2.93251	0.00336234
chr1	153680079-153680080	0.366655	0.104342	0.262314	0.0889672	2.94843	0.00319391
chr1	128713098-128713099	0.803449	0.527785	0.275664	0.0963223	2.86189	0.00421127
chr1	70321923-70321924	0.824738	0.575979	0.248759	0.0817449	3.04312	0.00234139
chr1	163315487-163315488	0.442203	0.177099	0.265105	0.0911512	2.90841	0.00363277
chr1	101564653-101564654	0.504326	0.245971	0.258355	0.0874963	2.95276	0.00314951
chr1	194051101-194051102	0.905926	0.666576	0.23935	0.0773014	3.09633	0.00195935
chr1	71223462-71223463	0.899405	0.659233	0.240172	0.0778302	3.08584	0.00202976
chr1	132183514-132183515	0.33577	0.0951341	0.240636	0.0786042	3.06136	0.00220337
chr1	71431445-71431446	0.920627	0.682716	0.237911	0.0771333	3.08441	0.00203959
chr1	179720456-179720457	0.822683	0.556953	0.26573	0.0929474	2.85893	0.00425075
chr1	56611660-56611661	0.484304	0.224222	0.260082	0.0898138	2.89579	0.00378199
chr1	178317738-178317739	0.112163	0.343771	-0.231609	0.0738776	-3.13503	0.00171837
chr1	87655614-87655615	0.828994	0.570833	0.258161	0.0888454	2.90574	0.00366388
chr1	173299269-173299270	0.841783	0.599314	0.242469	0.080381	3.0165	0.00255713
chr1	51598473-51598474	0.764585	0.980858	-0.216272	0.0656374	-3.29496	0.000984368
chr1	42192021-42192022	0.656214	0.391814	0.2644	0.0931988	2.83695	0.00455473
chr1	78167865-78167866	0.439268	0.166304	0.272964	0.0980945	2.78266	0.0053915
chr1	130508830-130508831	0.881561	0.645725	0.235836	0.0770785	3.05968	0.00221574
chr1	90360386-90360387	0.826806	0.5839	0.242907	0.0812108	2.99106	0.00278008
chr1	11451501-11451502	0.284832	0.00958458	0.275248	0.0998857	2.75563	0.00585794
chr1	58609853-58609854	0.4416	0.188049	0.253551	0.0875473	2.89616	0.00377757
chr1	163533063-163533064	0.907402	0.6584	0.249003	0.0849682	2.93054	0.00338375
chr1	159849932-159849933	0.780538	0.519961	0.260576	0.0916085	2.84446	0.00444873
chr1	82065936-82065937	0.854426	0.505002	0.349424	0.143267	2.43898	0.014729
chr1	136375789-136375790	0.661508	0.912995	-0.251486	0.0865894	-2.90436	0.0036801
chr1	121527954-121527955	0.278059	0.0348949	0.243164	0.0820654	2.96305	0.00304606
chr1	32287595-32287596	0.814365	0.573868	0.240497	0.0811138	2.96494	0.00302746
chr1	178870301-178870302	0.8959	0.651903	0.243997	0.0832238	2.93181	0.00336991
chr1	41395491-41395492	0.901391	0.662747	0.238644	0.0803212	2.97112	0.00296715
chr1	112764890-112764891	0.94066	0.714508	0.226152	0.0731472	3.09174	0.00198984
chr1	64137606-64137607	0.595742	0.336596	0.259147	0.0926278	2.79772	0.00514643
chr1	84487440-84487441	0.811392	0.55869	0.252703	0.0889193	2.84193	0.0044841
chr1	74249779-74249780	0.329239	0.592666	-0.263427	0.0953843	-2.76174	0.00574939
chr1	166310058-166310059	0.918061	0.676343	0.241718	0.0826993	2.92286	0.00346835
chr1	35489152-35489153	0.922164	0.687807	0.234357	0.0784222	2.9884	0.00280441
chr1	132514268-132514269	0.902252	0.661941	0.240311	0.0821315	2.92592	0.00343435
chr1	25601962-25601963	0.630433	0.377	0.253433	0.0900155	2.81544	0.0048711
chr1	46856841-46856842	0.783562	0.54701	0.236552	0.0803197	2.94513	0.00322818
chr1	64735813-64735814	0.450642	0.734208	-0.283567	0.108169	-2.6215	0.0087543
chr1	136258744-136258745	0.629957	0.889957	-0.26	0.0943035	-2.75706	0.00583239
chr1	184395620-184395621	0.838744	0.585751	0.252993	0.0902942	2.80187	0.00508072
chr1	169216008-169216009	0.699821	0.440817	0.259004	0.0938995	2.75831	0.00581013
chr1	132927891-132927892	0.96159	0.745078	0.216512	0.068819	3.14611	0.00165457
chr1	181170333-181170334	0.730514	0.462293	0.268221	0.0994432	2.69723	0.0069919
chr1	172512963-172512964	0.646893	0.379974	0.266919	0.0988232	2.70098	0.00691357
chr1	192856758-192856759	0.883281	0.641504	0.241777	0.0839064	2.88151	0.00395777
chr1	119324818-119324819	0.723799	0.443315	0.280484	0.1072	2.61646	0.00888464
chr1	95347959-95347960	0.771948	0.524269	0.247679	0.0876888	2.82452	0.00473511
chr1	68355739-68355740	0.794851	0.553643	0.241207	0.0841032	2.86799	0.00413088
chr1	17051669-17051670	0.941129	0.715563	0.225566	0.075331	2.99433	0.00275048
chr1	9799528-9799529	0.687498	0.440972	0.246526	0.0879923	2.80168	0.00508373
chr1	59141477-59141478	0.815105	0.572228	0.242877	0.0865141	2.80737	0.00499485
chr1	159903776-159903777	0.836492	0.595476	0.241016	0.0853887	2.82258	0.00476395
chr1	47442838-47442839	0.785385	0.546941	0.238444	0.0838907	2.84231	0.00447873
chr1	44064488-44064489	0.808014	0.563472	0.244543	0.0878793	2.78271	0.00539062
chr2	84741179-84741180	0.673345	0.235846	0.4375	0.100536	4.35168	1.35097e-05
chr2	168553962-168553963	0.821352	0.379701	0.44165	0.102049	4.32781	1.50603e-05
chr2	170232409-170232410	0.977149	0.659245	0.317904	0.0750152	4.23786	2.25657e-05
chr2	65986299-65986300	0.95632	0.649699	0.30662	0.0718653	4.2666	1.98477e-05
chr2	181068785-181068786	0.772937	0.414457	0.358481	0.0909041	3.9435	8.03003e-05
chr2	74723481-74723482	0.455163	0.0748992	0.380264	0.0986863	3.85326	0.000116557
chr2	94485366-94485367	0.859662	0.518138	0.341524	0.0872536	3.91415	9.07234e-05
chr2	84965825-84965826	0.825149	0.491585	0.333564	0.0869759	3.83513	0.000125498
chr2	136686957-136686958	0.641188	0.28535	0.355838	0.0977165	3.64154	0.000271017
chr2	89761788-89761789	0.786261	0.457291	0.328971	0.0877722	3.748	0.000178247
chr2	167206264-167206265	0.842377	0.497609	0.344768	0.0942939	3.65632	0.000255864
chr2	38825210-38825211	0.349409	0.0554635	0.293946	0.0756725	3.88445	0.000102562
chr2	116068790-116068791	0.709329	0.358367	0.350962	0.0994787	3.52801	0.000418689
chr2	34779990-34779991	0.824295	0.482739	0.341556	0.0966024	3.53569	0.000406705
chr2	92425566-92425567	0.719869	0.366315	0.353554	0.103077	3.43	0.00060359
chr2	152661465-152661466	0.274894	0.642405	-0.367512	0.10888	-3.37539	0.000737119
chr2	177557470-177557471	0.938561	0.638483	0.300077	0.0817176	3.67212	0.000240542
chr2	109516034-109516035	0.67523	0.356522	0.318708	0.0916158	3.47874	0.000503779
chr2	92583447-92583448	0.916745	0.624349	0.292396	0.0810315	3.60842	0.000308072
chr2	96862021-96862022	0.630134	0.301947	0.328187	0.0961677	3.41265	0.00064335
chr2	145956903-145956904	0.754742	0.437856	0.316886	0.0921091	3.44033	0.000581002
chr2	107565699-107565700	0.789473	0.483952	0.305521	0.0877667	3.48106	0.000499435
chr2	27204051-27204052	0.588546	0.254151	0.334395	0.101776	3.28559	0.00101769
chr2	91543805-91543806	0.600865	0.87936	-0.278494	0.0783462	-3.55466	0.000378466
chr2	59543605-59543606	0.875927	0.552514	0.323412	0.0990554	3.26496	0.00109478
chr2	38825292-38825293	0.3076	0.0466843	0.260916	0.0713788	3.65536	0.000256818
chr2	27182452-27182453	0.843233	0.54174	0.301493	0.0894552	3.37032	0.000750806
chr2	30095742-30095743	0.975112	0.703816	0.271296	0.0762025	3.5602	0.000370576
chr2	91355113-91355114	0.985805	0.745514	0.240291	0.0628067	3.82588	0.000130305
chr2	78923076-78923077	0.386321	0.728804	-0.342483	0.108647	-3.15224	0.00162024
chr2	90744683-90744684	0.236248	0.538983	-0.302735	0.0909102	-3.33004	0.000868329
chr2	97795446-97795447	0.72502	0.429912	0.295108	0.0886764	3.32792	0.000874972
chr2	165983577-165983578	0.658908	0.330165	0.328743	0.105719	3.10959	0.00187346
chr2	38825215-38825216	0.315077	0.0555743	0.259503	0.0737246	3.51989	0.000431721
chr2	171095912-171095913	0.42387	0.13381	0.29006	0.0886184	3.27314	0.00106361
chr2	161317943-161317944	0.937177	0.671222	0.265954	0.0788995	3.3708	0.000749511
chr2	172863706-172863707	0.761735	0.442581	0.319154	0.106254	3.00368	0.00266735
chr2	140659775-140659776	0.986048	0.743358	0.24269	0.0693624	3.49887	0.000467243
chr2	68757126-68757127	0.254206	0.0145298	0.239677	0.0680593	3.52159	0.000428973
chr2	121106690-121106691	0.794508	0.498042	0.296466	0.0957636	3.09581	0.00196275
chr2	16406712-16406713	0.863611	0.603127	0.260484	0.0788746	3.30251	0.00095824
chr2	164405380-164405381	0.575374	0.260294	0.31508	0.106584	2.95618	0.00311477
chr2	38825582-38825583	0.653989	0.373673	0.280316	0.0896303	3.12747	0.00176317
chr2	145157700-145157701	0.845514	0.578227	0.267287	0.0833202	3.20796	0.00133682
chr2	94538958-94538959	0.884939	0.56902	0.31592	0.107996	2.92528	0.00344143
chr2	124286159-124286160	0.788606	0.511287	0.277319	0.0892112	3.10856	0.00188
chr2	57254990-57254991	0.433123	0.156971	0.276152	0.0887016	3.11326	0.00185031
chr2	92238444-92238445	0.46491	0.757987	-0.293077	0.0973516	-3.0105	0.00260821
chr2	174472435-174472436	0.0842096	0.344215	-0.260005	0.0815296	-3.18909	0.00142722
chr2	67980512-67980513	0.843902	0.58764	0.256262	0.0802812	3.19205	0.00141264
chr2	109587583-109587584	0.604465	0.884223	-0.279758	0.0923841	-3.0282	0.00246014
chr2	59992738-59992739	0.616588	0.883386	-0.266798	0.085814	-3.10903	0.00187704
chr2	180434574-180434575	0.948456	0.70702	0.241436	0.0729089	3.31147	0.000928063
chr2	12841004-12841005	0.434068	0.708872	-0.274804	0.0901855	-3.04709	0.00231065
chr2	96877786-96877787	0.897676	0.641173	0.256504	0.0809074	3.17033	0.00152264
chr2	31320727-31320728	0.791742	0.508559	0.283183	0.0952169	2.97409	0.00293863
chr2	70486423-70486424	0.997437	0.781176	0.216261	0.0606822	3.56383	0.000365487
chr2	121573915-121573916	0.904079	0.639727	0.264352	0.0860314	3.07274	0.00212105
chr2	160356768-160356769	0.880111	0.626015	0.254096	0.0806724	3.14972	0.00163425
chr2	67264776-67264777	0.740586	0.461736	0.278851	0.0936478	2.97765	0.00290464
chr2	139609805-139609806	0.509546	0.218376	0.29117	0.100293	2.90319	0.00369377
chr2	119897620-119897621	0.320629	0.0642478	0.256381	0.0823263	3.11421	0.00184439
chr2	17710557-17710558	0.418116	0.698382	-0.280266	0.0949315	-2.9523	0.00315417
chr2	7317949-7317950	0.77136	0.492943	0.278417	0.0940045	2.96174	0.00305904
chr2	32683994-32683995	0.67504	0.953291	-0.278251	0.094172	-2.95471	0.00312968
chr2	165183539-165183540	0.796549	0.505921	0.290628	0.101555	2.86178	0.00421275
chr2	38825125-38825126	0.349849	0.107339	0.24251	0.0759024	3.19502	0.00139822
chr2	174012327-174012328	0.939126	0.696143	0.242983	0.0762053	3.18853	0.00142997
chr2	128413174-128413175	0.922942	0.673075	0.249867	0.0807716	3.0935	0.00197811
chr2	146046126-146046127	0.707797	0.421784	0.286013	0.10033	2.85072	0.00436202
chr2	107471385-107471386	0.574687	0.290853	0.283834	0.0992206	2.86064	0.00422787
chr2	147839594-147839595	0.0153043	0.232351	-0.217047	0.0631499	-3.437	0.000588186
chr2	47053260-47053261	0.65562	0.392422	0.263198	0.0881365	2.98625	0.00282418
chr2	50624293-50624294	0.778728	0.518161	0.260567	0.0869159	2.99792	0.00271826
chr2	137948136-137948137	0.744371	0.458976	0.285394	0.100924	2.82781	0.00468682
chr2	4883472-4883473	0.365268	0.120363	0.244905	0.0790136	3.09953	0.00193826
chr2	85521566-85521567	0.75455	0.489126	0.265424	0.0902577	2.94073	0.00327441
chr2	178959735-178959736	0.491771	0.215984	0.275787	0.0960017	2.87273	0.00406942
chr2	122065823-122065824	0.921707	0.67023	0.251477	0.0831031	3.02609	0.00247741
chr2	43743633-43743634	0.862116	0.602328	0.259788	0.0877305	2.96121	0.00306437
chr2	125304328-125304329	0.846638	0.562385	0.284253	0.101528	2.79975	0.00511422
chr2	151031718-151031719	0.903683	0.645024	0.258659	0.0876327	2.95163	0.00316102
chr2	45083202-45083203	0.816302	0.564417	0.251885	0.08416	2.99293	0.00276316
chr2	144544738-144544739	0.674229	0.927303	-0.253074	0.0849374	-2.97953	0.00288691
chr2	74074292-74074293	0.877728	0.622508	0.25522	0.0863492	2.95567	0.00311989
chr2	64096322-64096323	0.546532	0.262607	0.283924	0.102487	2.77034	0.00559974
chr2	77454343-77454344	0.384229	0.665576	-0.281348	0.101156	-2.78132	0.00541377
chr2	151035039-151035040	0.74854	0.475565	0.272974	0.0969532	2.81553	0.00486971
chr2	4815763-4815764	0.755233	0.985515	-0.230282	0.073042	-3.15273	0.0016175
chr2	86691067-86691068	0.537998	0.273763	0.264235	0.0923601	2.86092	0.00422409
chr2	119878980-119878981	0.691102	0.929064	-0.237962	0.077657	-3.06427	0.00218202
chr2	44241355-44241356	0.717346	0.45911	0.258236	0.0893964	2.88866	0.00386888
chr2	168441088-168441089	0.715931	0.971102	-0.255171	0.0878773	-2.90372	0.0036876
chr2	136030687-136030688	0.692335	0.428228	0.264106	0.0930611	2.83799	0.00453986
chr2	103568373-103568374	0.330338	0.0899743	0.240363	0.0795899	3.02002	0.00252754
chr2	144821037-144821038	0.929997	0.700582	0.229414	0.0734304	3.12424	0.00178266
chr2	69216248-69216249	0.970975	0.748725	0.222249	0.0693689	3.20388	0.00135589
chr2	139568812-139568813	0.699907	0.436975	0.262932	0.0925118	2.84214	0.00448113
chr2	143524922-143524923	0.89728	0.647085	0.250195	0.0855917	2.92312	0.00346542
chr2	136049841-136049842	0.670702	0.907845	-0.237143	0.0781557	-3.03424	0.00241145
chr2	76980150-76980151	0.640339	0.37454	0.265799	0.0947264	2.80596	0.00501666
chr2	38402439-38402440	0.968297	0.752467	0.21583	0.0662589	3.25737	0.00112451
chr2	104685101-104685102	0.134182	0.388181	-0.253998	0.0881341	-2.88195	0.00395217
chr2	31294650-31294651	0.895794	0.653495	0.242299	0.0814643	2.9743	0.00293658
chr2	113593212-113593213	0.883921	0.644083	0.239838	0.0801342	2.99295	0.00276293
chr2	172037203-172037204	0.576422	0.311305	0.265117	0.0946608	2.80071	0.00509901
chr2	92691695-92691696	0.788669	0.524964	0.263705	0.0939133	2.80796	0.00498559
chr2	65546618-65546619	0.472649	0.204927	0.267722	0.0963887	2.77753	0.00547743
chr2	18815104-18815105	0.856756	0.612882	0.243874	0.0831958	2.93133	0.00337519
chr2	162331803-162331804	0.885623	0.628434	0.257189	0.0912574	2.81828	0.00482815
chr2	75145197-75145198	0.83171	0.57248	0.25923	0.0924783	2.80314	0.00506073
chr2	166333981-166333982	0.927809	0.67611	0.251699	0.0881719	2.85464	0.00430858
chr2	122699076-122699077	0.361281	0.128134	0.233147	0.0777295	2.99947	0.00270449
chr2	76087007-76087008	0.681036	0.41947	0.261566	0.0946408	2.76378	0.00571359
chr2	168613326-168613327	0.394985	0.142638	0.252347	0.089339	2.8246	0.00473395
chr2	178731399-178731400	0.558318	0.287064	0.271254	0.100513	2.6987	0.00696109
chr2	6656527-6656528	0.888682	0.653601	0.235081	0.0796935	2.94981	0.00317964
chr2	11665640-11665641	0.636364	0.380232	0.256132	0.0924559	2.77032	0.00560013
chr2	170038083-170038084	0.360332	0.10249	0.257841	0.0936177	2.75419	0.00588368
chr2	103512131-103512132	0.245141	0.0352963	0.209844	0.065191	3.21891	0.00128677
chr2	86708310-86708311	0.534372	0.271321	0.263052	0.0968572	2.71587	0.00661015
chr2	7925354-7925355	0.542295	0.785085	-0.24279	0.085152	-2.85125	0.00435473
chr2	137681123-137681124	0.834206	0.589228	0.244977	0.0864996	2.83212	0.00462403
chr2	177788747-177788748	0.558651	0.306023	0.252629	0.0912553	2.76837	0.00563375
chr2	140165530-140165531	0.573583	0.321629	0.251953	0.0909544	2.77011	0.00560379
chr2	117283790-117283791	0.690271	0.434595	0.255676	0.0933368	2.73928	0.00615732
chr2	48378048-48378049	0.81888	0.574517	0.244364	0.0866573	2.81988	0.00480409
chr2	135759184-135759185	0.822091	0.581159	0.240931	0.0846517	2.84615	0.00442514
chr2	133049043-133049044	0.908894	0.689931	0.218964	0.0715903	3.05856	0.00222402
chr2	57997969-57997970	0.356536	0.113146	0.24339	0.0864437	2.81559	0.00486871
chr2	38825188-38825189	0.351683	0.11576	0.235922	0.0820642	2.87485	0.00404219
chr2	146231390-146231391	0.872941	0.635438	0.237503	0.0830522	2.85968	0.00424068
chr2	168263068-168263069	0.874995	0.614593	0.260402	0.0970137	2.68417	0.00727092
chr2	56993151-56993152	0.243948	0.497085	-0.253137	0.0927647	-2.72881	0.00635629
chr2	133671889-133671890	0.51773	0.262668	0.255062	0.0942876	2.70515	0.00682734
chr2	90744722-90744723	0.54597	0.784234	-0.238264	0.084059	-2.83448	0.00458999
chr3	38621333-38621334	0.780002	0.200722	0.57928	0.100248	5.77844	7.53966e-09
chr3	96171573-96171574	0.35607	0.776806	-0.420736	0.0918165	-4.58236	4.5976e-06
chr3	52610155-52610156	0.648294	0.979984	-0.331689	0.0769076	-4.31283	1.61176e-05
chr3	65629689-65629690	0.881503	0.526914	0.35459	0.0845157	4.19555	2.72215e-05
chr3	112346125-112346126	0.146393	0.473454	-0.327061	0.0769761	-4.24886	2.1486e-05
chr3	28426106-28426107	0.3038	0.643355	-0.339555	0.0849268	-3.99821	6.38236e-05
chr3	59262712-59262713	0.562026	0.171156	0.39087	0.107406	3.6392	0.000273491
chr3	27057377-27057378	0.105667	0.478972	-0.373305	0.101141	-3.69095	0.000223418
chr3	149519688-149519689	0.206118	0.548662	-0.342544	0.0917201	-3.73466	0.000187966
chr3	46407087-46407088	0.956673	0.607051	0.349622	0.0970894	3.60103	0.000316957
chr3	150944431-150944432	0.572769	0.249758	0.323012	0.0870263	3.71166	0.000205908
chr3	38694010-38694011	0.780759	0.315232	0.465527	0.143909	3.23487	0.00121698
chr3	59262847-59262848	0.571023	0.210697	0.360327	0.104256	3.45618	0.00054788
chr3	59027115-59027116	0.348346	0.674269	-0.325924	0.0922474	-3.53315	0.000410644
chr3	107437143-107437144	0.946445	0.660987	0.285458	0.07658	3.72758	0.00019333
chr3	17789186-17789187	0.449253	0.151036	0.298217	0.0822302	3.62662	0.000287158
chr3	95140418-95140419	0.436057	0.776976	-0.340919	0.100558	-3.39028	0.00069822
chr3	152969939-152969940	0.869387	0.528734	0.340653	0.101061	3.37077	0.000749584
chr3	59262811-59262812	0.641944	0.239345	0.402599	0.127162	3.16603	0.00154532
chr3	155745636-155745637	0.729559	0.41054	0.319019	0.0939202	3.3967	0.000682046
chr3	59262807-59262808	0.595935	0.225278	0.370658	0.116412	3.18401	0.00145248
chr3	153959993-153959994	0.698415	0.375615	0.3228	0.0959315	3.3649	0.000765722
chr3	46139017-46139018	0.850042	0.513961	0.33608	0.10184	3.30009	0.000966533
chr3	13849042-13849043	0.754508	0.439656	0.314852	0.0928129	3.39234	0.000692995
chr3	33785261-33785262	0.951946	0.675456	0.27649	0.0763064	3.62342	0.000290737
chr3	148008562-148008563	0.881788	0.56975	0.312038	0.0917516	3.4009	0.000671636
chr3	130214675-130214676	0.3989	0.701247	-0.302346	0.08782	-3.44279	0.000575738
chr3	19182912-19182913	0.939726	0.670321	0.269405	0.0735325	3.66376	0.000248543
chr3	6874560-6874561	0.914313	0.631644	0.28267	0.0796569	3.54859	0.000387302
chr3	143866172-143866173	0.935593	0.643145	0.292448	0.0848003	3.44866	0.000563376
chr3	146709140-146709141	0.970112	0.701309	0.268803	0.0747136	3.59778	0.000320947
chr3	46092499-46092500	0.885791	0.568696	0.317096	0.0972028	3.26221	0.00110548
chr3	95140126-95140127	0.325864	0.66075	-0.334886	0.105997	-3.15939	0.00158099
chr3	65629706-65629707	0.849393	0.552043	0.297349	0.0896435	3.31702	0.000909836
chr3	100738855-100738856	0.71373	0.962956	-0.249226	0.0678585	-3.67273	0.000239975
chr3	66480333-66480334	0.906414	0.630256	0.276158	0.080278	3.44003	0.000581655
chr3	38227258-38227259	0.969898	0.716416	0.253482	0.0703068	3.60538	0.000311702
chr3	120684735-120684736	0.910271	0.636422	0.273849	0.07986	3.42912	0.00060555
chr3	46394617-46394618	0.981921	0.674752	0.307169	0.0957428	3.20827	0.00133537
chr3	34801180-34801181	0.918512	0.634989	0.283523	0.0858172	3.30381	0.000953813
chr3	16811984-16811985	0.721371	0.43418	0.28719	0.0888233	3.23328	0.00122379
chr3	85814636-85814637	0.732858	0.440378	0.29248	0.091667	3.19068	0.00141938
chr3	88333065-88333066	0.698682	0.979003	-0.280321	0.0862857	-3.24875	0.00115913
chr3	107557721-107557722	0.582852	0.283721	0.299131	0.0953251	3.13801	0.001701
chr3	158077033-158077034	0.446837	0.171524	0.275313	0.084205	3.26955	0.00107717
chr3	93694426-93694427	0.886817	0.604201	0.282615	0.087737	3.22117	0.0012767
chr3	54316696-54316697	0.729058	0.425501	0.303557	0.097914	3.10024	0.00193364
chr3	83752746-83752747	0.601338	0.312013	0.289325	0.092048	3.1432	0.00167114
chr3	109732545-109732546	0.363198	0.0961358	0.267062	0.0813199	3.28409	0.00102311
chr3	138751642-138751643	0.7268	0.418889	0.307911	0.1016	3.03064	0.00244039
chr3	126092688-126092689	0.865964	0.609854	0.256109	0.0764348	3.35069	0.000806114
chr3	129224868-129224869	0.304055	0.0446665	0.259389	0.0786754	3.29695	0.000977411
chr3	151817585-151817586	0.911895	0.660952	0.250942	0.074509	3.36795	0.000757306
chr3	10022355-10022356	0.755598	0.465665	0.289933	0.0948163	3.05784	0.0022294
chr3	134704900-134704901	0.536874	0.258301	0.278573	0.0894244	3.11518	0.00183835
chr3	127661006-127661007	0.659531	0.370196	0.289335	0.0950614	3.04366	0.00233718
chr3	59262795-59262796	0.64319	0.290811	0.352379	0.127214	2.76998	0.00560602
chr3	94696863-94696864	0.632671	0.907769	-0.275097	0.0883214	-3.11473	0.00184112
chr3	144367804-144367805	0.538666	0.250114	0.288551	0.0953832	3.02518	0.00248484
chr3	16261448-16261449	0.917746	0.671149	0.246597	0.0747561	3.29869	0.000971372
chr3	132609051-132609052	0.888331	0.6379	0.250431	0.0769068	3.25629	0.00112877
chr3	116806649-116806650	0.514524	0.808068	-0.293544	0.099138	-2.96096	0.00306681
chr3	98427850-98427851	0.045318	0.312167	-0.266849	0.085824	-3.10925	0.0018756
chr3	20615214-20615215	0.921671	0.679104	0.242566	0.0734344	3.30317	0.000955985
chr3	154773964-154773965	0.743566	0.46816	0.275407	0.0905704	3.0408	0.00235949
chr3	149888803-149888804	0.83797	0.569395	0.268575	0.0871819	3.08063	0.00206565
chr3	95140238-95140239	0.21282	0.501335	-0.288516	0.098653	-2.92455	0.00344953
chr3	135557438-135557439	0.580895	0.840264	-0.259369	0.0834482	-3.10814	0.00188266
chr3	42011283-42011284	0.909991	0.656384	0.253607	0.0806556	3.14432	0.00166473
chr3	132815197-132815198	0.682766	0.931396	-0.24863	0.07813	-3.18226	0.00146128
chr3	54908675-54908676	0.974302	0.752965	0.221337	0.0638077	3.46881	0.000522768
chr3	154077272-154077273	0.905461	0.625186	0.280275	0.0957065	2.92848	0.00340619
chr3	130377247-130377248	0.549696	0.80972	-0.260024	0.0849664	-3.06031	0.00221105
chr3	95888073-95888074	0.903588	0.657994	0.245594	0.0773273	3.17604	0.00149303
chr3	30557693-30557694	0.860105	0.603758	0.256346	0.0832426	3.07951	0.00207342
chr3	102712211-102712212	0.44138	0.734092	-0.292712	0.102846	-2.84613	0.0044254
chr3	126291883-126291884	0.91274	0.676499	0.236241	0.0727679	3.24651	0.00116831
chr3	139555127-139555128	0.978272	0.768253	0.210019	0.0588816	3.5668	0.000361371
chr3	114127305-114127306	0.70389	0.44437	0.25952	0.0859025	3.0211	0.00251855
chr3	130922915-130922916	0.711549	0.427418	0.284131	0.0992171	2.86373	0.0041869
chr3	95140401-95140402	0.549542	0.830995	-0.281453	0.0977748	-2.87858	0.00399469
chr3	40364876-40364877	0.777986	0.501398	0.276588	0.0955282	2.89535	0.00378731
chr3	56998020-56998021	0.980017	0.7503	0.229717	0.0702138	3.27167	0.00106913
chr3	154636071-154636072	0.889649	0.639215	0.250434	0.0814335	3.07532	0.0021028
chr3	94497412-94497413	0.961152	0.72845	0.232702	0.071995	3.2322	0.00122839
chr3	109028515-109028516	0.627524	0.346144	0.28138	0.0986006	2.85373	0.00432086
chr3	88372056-88372057	0.817662	0.571654	0.246008	0.0794541	3.09623	0.00195999
chr3	27985247-27985248	0.79485	0.533332	0.261518	0.0879601	2.97314	0.00294766
chr3	52267050-52267051	0.657564	0.383482	0.274082	0.0948163	2.89066	0.00384429
chr3	143158773-143158774	0.765327	0.497281	0.268046	0.0916712	2.924	0.00345567
chr3	87515719-87515720	0.353044	0.103343	0.2497	0.0818109	3.05216	0.00227198
chr3	30746251-30746252	0.885376	0.628142	0.257234	0.0859627	2.99239	0.00276799
chr3	138280910-138280911	0.636127	0.361221	0.274905	0.0956982	2.87263	0.00407072
chr3	68448599-68448600	0.688921	0.407358	0.281563	0.0995144	2.82937	0.00466402
chr3	100221307-100221308	0.886955	0.638322	0.248633	0.0815836	3.04758	0.00230689
chr3	148254050-148254051	0.833054	0.575076	0.257979	0.0867509	2.97379	0.00294151
chr3	146612442-146612443	0.655121	0.367319	0.287803	0.103186	2.78917	0.00528436
chr3	108396726-108396727	0.604968	0.882275	-0.277307	0.0974083	-2.84685	0.00441537
chr3	91759661-91759662	0.833951	0.585546	0.248405	0.081559	3.04571	0.00232129
chr3	63365605-63365606	0.616737	0.338438	0.278299	0.0980746	2.83763	0.00454496
chr3	34338155-34338156	0.679654	0.411317	0.268337	0.0930074	2.88511	0.00391272
chr3	52267123-52267124	0.642402	0.376398	0.266003	0.0919362	2.89335	0.00381157
chr3	18772220-18772221	0.560864	0.287603	0.27326	0.0960578	2.84475	0.00444465
chr3	123205648-123205649	0.862978	0.610971	0.252007	0.0842821	2.99005	0.00278936
chr3	116798011-116798012	0.461072	0.728343	-0.267271	0.0931413	-2.86952	0.00411094
chr3	118243823-118243824	0.932149	0.706368	0.225781	0.0702878	3.21224	0.00131704
chr3	119884271-119884272	0.930297	0.700095	0.230202	0.0728732	3.15895	0.00158341
chr3	30014394-30014395	0.773443	0.516342	0.257101	0.0879681	2.92266	0.00347055
chr3	156948770-156948771	0.681683	0.406604	0.275079	0.0983128	2.79799	0.00514214
chr3	21992137-21992138	0.997081	0.797733	0.199348	0.0558973	3.56633	0.000362021
chr3	40328493-40328494	0.870255	0.621158	0.249096	0.0839553	2.96701	0.00300708
chr3	28351193-28351194	0.516762	0.786085	-0.269323	0.0954827	-2.82065	0.00479266
chr3	66401468-66401469	0.682105	0.405605	0.2765	0.0997879	2.77088	0.00559054
chr3	156553781-156553782	0.824569	0.561823	0.262747	0.0923314	2.8457	0.00443146
chr3	36940204-36940205	0.538686	0.790391	-0.251704	0.0865737	-2.9074	0.00364448
chr3	130186051-130186052	0.800401	0.538942	0.261458	0.0924279	2.82878	0.00467255
chr3	28609428-28609429	0.889119	0.641259	0.247861	0.0846432	2.9283	0.00340821
chr3	123205706-123205707	0.840849	0.591218	0.249631	0.0857778	2.91021	0.00361189
chr3	132815198-132815199	0.682766	0.919978	-0.237212	0.0788153	-3.00972	0.00261487
chr3	68142035-68142036	0.847168	0.592575	0.254593	0.0890477	2.85906	0.00424896
chr3	9003587-9003588	0.751162	0.496142	0.255021	0.0893029	2.85568	0.00429447
chr3	66183286-66183287	0.90322	0.667916	0.235304	0.0780873	3.01334	0.0025839
chr3	92506551-92506552	0.816155	0.560796	0.255359	0.0898749	2.84128	0.00449335
chr3	30887622-30887623	0.830596	0.587526	0.243071	0.0828022	2.93556	0.00332944
chr3	50619894-50619895	0.871985	0.635794	0.236191	0.0788788	2.99435	0.00275027
chr3	99622759-99622760	0.81215	0.566268	0.245883	0.0846265	2.9055	0.00366662
chr3	134255889-134255890	0.903562	0.671454	0.232108	0.0766519	3.02808	0.00246115
chr3	126504412-126504413	0.911207	0.671281	0.239926	0.0813785	2.94827	0.00319554
chr3	130214697-130214698	0.465118	0.716626	-0.251508	0.0882081	-2.85131	0.00435399
chr3	20414802-20414803	0.766802	0.505255	0.261547	0.094075	2.7802	0.00543261
chr3	94838814-94838815	0.353783	0.103357	0.250426	0.0876334	2.85765	0.00426792
chr3	128232844-128232845	0.871946	0.630544	0.241402	0.0823751	2.93052	0.00338396
chr3	96171675-96171676	0.0120462	0.222403	-0.210357	0.0643017	-3.27141	0.00107014
chr3	55113234-55113235	0.378432	0.142205	0.236228	0.0794167	2.97453	0.00293434
chr3	45789673-45789674	0.923232	0.621637	0.301595	0.117761	2.56108	0.0104347
chr3	146825743-146825744	0.273238	0.524764	-0.251526	0.0884081	-2.84506	0.0044403
chr3	137757605-137757606	0.996717	0.798107	0.198609	0.0578122	3.43542	0.000591637
chr3	13710899-13710900	0.609949	0.357125	0.252824	0.0897827	2.81595	0.00486335
chr3	25143442-25143443	0.293199	0.0655384	0.227661	0.0752217	3.02653	0.00247375
chr3	87157856-87157857	0.149934	0.39895	-0.249017	0.088015	-2.82925	0.0046657
chr3	39129414-39129415	0.87211	0.642662	0.229448	0.0764446	3.00149	0.0026866
chr3	132815199-132815200	0.668767	0.908118	-0.239351	0.0824466	-2.9031	0.00369487
chr3	155907018-155907019	0.955638	0.742476	0.213162	0.0670048	3.1813	0.00146618
chr3	85105666-85105667	0.866713	0.62127	0.245442	0.0864502	2.83912	0.00452381
chr3	91967991-91967992	0.662547	0.410338	0.252209	0.0908448	2.77626	0.00549882
chr3	63394844-63394845	0.831936	0.592816	0.23912	0.0830552	2.87905	0.00398873
chr3	135902729-135902730	0.802968	0.559156	0.243811	0.0859059	2.83812	0.00453799
chr3	18948641-18948642	0.824479	0.553369	0.27111	0.102442	2.64648	0.0081335
chr3	146610022-146610023	0.573623	0.313048	0.260575	0.0961401	2.71037	0.00672081
chr3	114066038-114066039	0.693837	0.423159	0.270678	0.102241	2.64745	0.00811023
chr3	138228337-138228338	0.467162	0.726654	-0.259491	0.0955223	-2.71655	0.0065966
chr3	34318281-34318282	0.908891	0.680267	0.228624	0.0771141	2.96475	0.00302929
chr3	46280692-46280693	0.905888	0.662849	0.243038	0.0858165	2.83207	0.00462478
chr3	88564684-88564685	0.332424	0.0921075	0.240316	0.0845405	2.84262	0.00447447
chr3	107088316-107088317	0.818812	0.57961	0.239202	0.0840423	2.84622	0.00442421
chr3	98259608-98259609	0.462407	0.132678	0.329729	0.139633	2.3614	0.0182062
chr3	149077473-149077474	0.537188	0.79755	-0.260362	0.097099	-2.68141	0.0073312
chr4	108134786-108134787	0.531988	0.915352	-0.383364	0.0910448	-4.21071	2.54565e-05
chr4	125417324-125417325	0.682359	0.292036	0.390322	0.100636	3.87857	0.000105072
chr4	136955843-136955844	0.809548	0.417101	0.392447	0.104241	3.76482	0.000166672
chr4	35843988-35843989	0.872029	0.546702	0.325327	0.0827479	3.93154	8.44018e-05
chr4	134263414-134263415	0.405152	0.080174	0.324978	0.0861215	3.77349	0.000160982
chr4	40704024-40704025	0.722586	0.364701	0.357884	0.102378	3.49571	0.000472795
chr4	73790316-73790317	0.725934	0.387831	0.338103	0.0967722	3.4938	0.000476189
chr4	21980561-21980562	0.877925	0.56871	0.309215	0.0850895	3.63399	0.000279068
chr4	25159455-25159456	0.942412	0.623927	0.318485	0.0895819	3.55524	0.00037764
chr4	51475649-51475650	0.930984	0.661792	0.269192	0.070048	3.84297	0.000121553
chr4	126666002-126666003	0.901181	0.598123	0.303059	0.0869398	3.48585	0.000490582
chr4	144529820-144529821	0.623917	0.300021	0.323897	0.0978123	3.31141	0.000928265
chr4	62847379-62847380	0.659684	0.338792	0.320891	0.0983309	3.26338	0.00110091
chr4	156352663-156352664	0.49367	0.804421	-0.310751	0.0947107	-3.28105	0.0010342
chr4	151351919-151351920	0.4445	0.139351	0.305149	0.0925368	3.2976	0.000975148
chr4	53439693-53439694	0.241744	0.536775	-0.295031	0.0896307	-3.29163	0.000996092
chr4	96797617-96797618	0.892785	0.623651	0.269134	0.0785632	3.4257	0.000613214
chr4	101437358-101437359	0.180737	0.482377	-0.30164	0.0950586	-3.17319	0.00150772
chr4	100944194-100944195	0.979381	0.730746	0.248635	0.0704772	3.52788	0.000418902
chr4	26359858-26359859	0.527522	0.237068	0.290454	0.0925333	3.13891	0.00169576
chr4	77656888-77656889	0.593396	0.30398	0.289416	0.0926466	3.12387	0.00178489
chr4	25660780-25660781	0.651916	0.359416	0.292499	0.0944004	3.0985	0.00194506
chr4	44636878-44636879	0.821342	0.527112	0.29423	0.0957208	3.07383	0.00211328
chr4	129311996-129311997	0.484001	0.775988	-0.291988	0.0949698	-3.07453	0.00210833
chr4	91144117-91144118	0.363482	0.661272	-0.29779	0.0979874	-3.03907	0.00237312
chr4	62286024-62286025	0.937229	0.684011	0.253218	0.0761291	3.32616	0.000880499
chr4	32831235-32831236	0.888987	0.617008	0.27198	0.0859407	3.16474	0.00155221
chr4	114907003-114907004	0.513972	0.22263	0.291342	0.0969272	3.00578	0.00264901
chr4	65837338-65837339	0.718838	0.451376	0.267462	0.0854384	3.13046	0.00174531
chr4	27390247-27390248	0.890766	0.635747	0.25502	0.0792228	3.21902	0.0012863
chr4	9987617-9987618	0.603175	0.314951	0.288224	0.0965053	2.98661	0.00282091
chr4	35146841-35146842	0.356476	0.638008	-0.281531	0.0933001	-3.01748	0.00254884
chr4	24099756-24099757	0.820697	0.556469	0.264228	0.0845716	3.12431	0.0017822
chr4	141443763-141443764	0.716169	0.421562	0.294607	0.100615	2.92807	0.00341071
chr4	133910357-133910358	0.109452	0.393128	-0.283675	0.0952792	-2.9773	0.00290795
chr4	143382515-143382516	0.980543	0.754689	0.225855	0.0653904	3.45394	0.000552463
chr4	130045184-130045185	0.484112	0.765393	-0.281282	0.0943284	-2.98194	0.00286429
chr4	40928062-40928063	0.341359	0.638688	-0.297329	0.102788	-2.89266	0.00381998
chr4	63435400-63435401	0.9726	0.732203	0.240397	0.0735517	3.26841	0.00108152
chr4	6328729-6328730	0.710698	0.43337	0.277328	0.0929736	2.98287	0.0028556
chr4	45316914-45316915	0.800701	0.529386	0.271315	0.0899411	3.01658	0.00255641
chr4	41318523-41318524	0.921169	0.676811	0.244357	0.0757995	3.22373	0.00126531
chr4	153827206-153827207	0.718259	0.433806	0.284453	0.0977172	2.91098	0.00360292
chr4	65190409-65190410	0.953742	0.716993	0.236749	0.0727092	3.2561	0.00112952
chr4	85542863-85542864	0.839473	0.582834	0.256639	0.0839807	3.05593	0.00224367
chr4	142957133-142957134	0.672548	0.388014	0.284534	0.0990788	2.8718	0.00408143
chr4	91803019-91803020	0.832889	0.580646	0.252242	0.081736	3.08606	0.00202827
chr4	153820617-153820618	0.906639	0.650106	0.256533	0.0842217	3.04593	0.00231964
chr4	34686585-34686586	0.46176	0.192551	0.269209	0.0912041	2.95172	0.0031601
chr4	27520683-27520684	0.773745	0.511055	0.26269	0.0877099	2.99499	0.00274458
chr4	153689556-153689557	0.971667	0.746137	0.225531	0.0677588	3.32843	0.000873359
chr4	118334404-118334405	0.908734	0.647527	0.261207	0.0872117	2.99509	0.00274366
chr4	101088596-101088597	0.458508	0.192337	0.26617	0.0899276	2.95983	0.00307809
chr4	133402250-133402251	0.614836	0.878205	-0.263369	0.0885194	-2.97527	0.00292727
chr4	138968552-138968553	0.155339	0.432657	-0.277318	0.0961091	-2.88545	0.00390849
chr4	130650493-130650494	0.877292	0.619967	0.257325	0.0858555	2.99719	0.00272485
chr4	115741698-115741699	0.69361	0.931861	-0.23825	0.0758363	-3.14164	0.00168005
chr4	138459811-138459812	0.371646	0.11504	0.256607	0.0859564	2.98531	0.00283288
chr4	31320642-31320643	0.753107	0.463328	0.28978	0.104428	2.77492	0.00552146
chr4	133492372-133492373	0.968134	0.721293	0.24684	0.0807997	3.05496	0.00225088
chr4	17855618-17855619	0.831981	0.590082	0.241899	0.0785201	3.08073	0.00206494
chr4	14103763-14103764	0.606221	0.339771	0.26645	0.0927461	2.87289	0.0040673
chr4	18447038-18447039	0.930611	0.703774	0.226837	0.0706894	3.20892	0.00133233
chr4	137638832-137638833	0.649608	0.897813	-0.248205	0.0827032	-3.00115	0.00268958
chr4	134209823-134209824	0.996924	0.787575	0.209349	0.0610236	3.43063	0.000602192
chr4	79468687-79468688	0.884271	0.636943	0.247328	0.0823627	3.00292	0.00267407
chr4	131217249-131217250	0.87857	0.62391	0.25466	0.0866612	2.93857	0.0032973
chr4	35155052-35155053	0.37892	0.123661	0.25526	0.087232	2.92622	0.00343113
chr4	58581531-58581532	0.661129	0.377884	0.283244	0.103228	2.74386	0.00607208
chr4	102551468-102551469	0.786616	0.529041	0.257575	0.0888398	2.89932	0.00373972
chr4	23058603-23058604	0.791494	0.529155	0.262339	0.0922876	2.84262	0.0044744
chr4	125562632-125562633	0.681297	0.399033	0.282264	0.104586	2.69886	0.00695778
chr4	43710656-43710657	0.858799	0.609485	0.249314	0.0856204	2.91185	0.00359297
chr4	21230689-21230690	0.818624	0.548821	0.269803	0.0974736	2.76796	0.00564079
chr4	101842363-101842364	0.801296	0.535087	0.266208	0.095559	2.7858	0.00533954
chr4	154710020-154710021	0.894847	0.648661	0.246186	0.0840836	2.92787	0.00341292
chr4	36029136-36029137	0.97476	0.746848	0.227912	0.0735837	3.09732	0.00195278
chr4	124437670-124437671	0.915345	0.684048	0.231297	0.0756043	3.05931	0.0022185
chr4	149917099-149917100	0.713936	0.946228	-0.232292	0.0762778	-3.04534	0.00232418
chr4	153222846-153222847	0.389621	0.654468	-0.264847	0.0951114	-2.78459	0.00535948
chr4	138371158-138371159	0.592521	0.322641	0.26988	0.0980944	2.75122	0.0059373
chr4	18897887-18897888	0.835071	0.599434	0.235637	0.0783095	3.00905	0.00262069
chr4	59415613-59415614	0.835969	0.577781	0.258188	0.0915879	2.81902	0.00481705
chr4	127572952-127572953	0.615059	0.882908	-0.267849	0.0972148	-2.75523	0.00586503
chr4	120025125-120025126	0.95368	0.731697	0.221983	0.070637	3.14259	0.00167458
chr4	127911655-127911656	0.821696	0.564804	0.256892	0.091046	2.82156	0.004779
chr4	117800702-117800703	0.843965	0.607121	0.236844	0.0794811	2.97988	0.0028836
chr4	63436407-63436408	0.899418	0.657006	0.242412	0.0827327	2.93006	0.00338892
chr4	43466602-43466603	0.842142	0.588185	0.253957	0.0900382	2.82055	0.00479411
chr4	134263235-134263236	0.407518	0.149964	0.257554	0.092257	2.7917	0.00524321
chr4	152862260-152862261	0.717953	0.945821	-0.227868	0.0752031	-3.03003	0.00244527
chr4	28956457-28956458	0.922014	0.699268	0.222747	0.0723828	3.07734	0.00208854
chr4	120333764-120333765	0.849399	0.601991	0.247408	0.0872533	2.83552	0.00457515
chr4	16366534-16366535	0.722325	0.468446	0.253878	0.0912244	2.78301	0.00538574
chr4	49692166-49692167	0.740922	0.484239	0.256684	0.0929403	2.76181	0.0057482
chr4	86559270-86559271	0.452367	0.198898	0.253469	0.0911232	2.7816	0.0054091
chr4	84735919-84735920	0.798218	0.542522	0.255696	0.0926291	2.76043	0.00577258
chr4	148923916-148923917	0.893008	0.645169	0.247839	0.0879742	2.81718	0.00484473
chr4	35795777-35795778	0.880695	0.638752	0.241943	0.0848762	2.85054	0.00436447
chr4	27036877-27036878	0.804262	0.54903	0.255232	0.0929898	2.74474	0.00605595
chr4	7580924-7580925	0.558957	0.305887	0.25307	0.0921028	2.74769	0.0060016
chr4	65238289-65238290	0.725764	0.460857	0.264907	0.0995151	2.66198	0.00776829
chr4	136714115-136714116	0.873765	0.620248	0.253517	0.0927074	2.73459	0.00624578
chr4	26104851-26104852	0.731446	0.481366	0.25008	0.0911165	2.74462	0.00605817
chr5	3493932-3493933	0.825172	0.294904	0.530268	0.0980547	5.40788	6.37751e-08
chr5	3938882-3938883	0.610696	0.150951	0.459745	0.0903584	5.08802	3.6182e-07
chr5	4089953-4089954	0.511451	0.923667	-0.412216	0.0815898	-5.0523	4.36515e-07
chr5	4089675-4089676	0.411514	0.868552	-0.457038	0.0938644	-4.86913	1.12091e-06
chr5	135658921-135658922	0.981168	0.577468	0.4037	0.0804749	5.01647	5.26302e-07
chr5	135596729-135596730	0.846205	0.471732	0.374473	0.0796007	4.7044	2.54613e-06
chr5	120765380-120765381	0.752832	0.351077	0.401754	0.095776	4.19473	2.73197e-05
chr5	122353675-122353676	0.643255	0.965647	-0.322392	0.0710911	-4.53491	5.76268e-06
chr5	3845511-3845512	0.460043	0.819616	-0.359573	0.0862317	-4.16985	3.048e-05
chr5	3494283-3494284	0.833451	0.458687	0.374764	0.0937012	3.99956	6.34601e-05
chr5	118136524-118136525	0.32271	0.814498	-0.491789	0.139736	-3.51941	0.000432501
chr5	29938138-29938139	0.347735	0.744696	-0.396962	0.1083	-3.66538	0.000246967
chr5	90448905-90448906	0.195675	0.524557	-0.328882	0.0845582	-3.88941	0.000100486
chr5	76837025-76837026	0.431164	0.0944957	0.336669	0.0880282	3.82455	0.00013101
chr5	119037820-119037821	0.863448	0.501389	0.362058	0.0987839	3.66515	0.000247189
chr5	3894407-3894408	0.835555	0.504499	0.331056	0.087977	3.76299	0.000167896
chr5	3377641-3377642	0.555429	0.871283	-0.315853	0.084602	-3.7334	0.00018891
chr5	17579717-17579718	0.590358	0.251112	0.339247	0.0943529	3.59551	0.000323758
chr5	28463094-28463095	0.745823	0.383738	0.362084	0.108289	3.34368	0.000826744
chr5	22173729-22173730	0.973239	0.715522	0.257717	0.0652648	3.94879	7.85485e-05
chr5	118622545-118622546	0.739067	0.428372	0.310695	0.0879231	3.53372	0.000409759
chr5	53525870-53525871	0.631479	0.276358	0.355121	0.106795	3.32524	0.000883416
chr5	86704626-86704627	0.861588	0.586928	0.27466	0.0751451	3.65507	0.000257115
chr5	118230573-118230574	0.595895	0.905423	-0.309528	0.0905408	-3.41866	0.000629309
chr5	16293958-16293959	0.508845	0.182114	0.326731	0.0981389	3.32928	0.000870717
chr5	113065961-113065962	0.914459	0.619901	0.294559	0.0871912	3.37831	0.000729332
chr5	16246682-16246683	0.820667	0.540891	0.279776	0.0809193	3.45748	0.000545262
chr5	118622587-118622588	0.76811	0.449031	0.319079	0.0993617	3.21129	0.00132142
chr5	100509345-100509346	0.871685	0.579641	0.292044	0.0871514	3.351	0.000805207
chr5	115108891-115108892	0.667041	0.941573	-0.274532	0.0801591	-3.42484	0.000615168
chr5	99620861-99620862	0.295631	0.602648	-0.307017	0.095313	-3.22114	0.0012768
chr5	128849549-128849550	0.62792	0.91864	-0.290721	0.0883653	-3.28999	0.00100191
chr5	74126414-74126415	0.042352	0.325173	-0.282821	0.0850593	-3.32498	0.000884246
chr5	148003128-148003129	0.787325	0.492609	0.294716	0.0916211	3.21668	0.00129681
chr5	113516618-113516619	0.479579	0.187934	0.291645	0.0910288	3.20388	0.00135591
chr5	77708203-77708204	0.768804	0.478469	0.290335	0.0904265	3.21073	0.00132398
chr5	117854425-117854426	0.964678	0.709665	0.255013	0.0750397	3.39838	0.000677864
chr5	129524918-129524919	0.268461	0.645166	-0.376705	0.13475	-2.79559	0.00518054
chr5	9032574-9032575	0.517755	0.221982	0.295773	0.09604	3.07969	0.00207219
chr5	91273884-91273885	0.759134	0.47365	0.285484	0.0922271	3.09545	0.00196516
chr5	130152597-130152598	0.719829	0.972063	-0.252234	0.0758642	-3.32481	0.000884789
chr5	38599111-38599112	0.830927	0.561837	0.26909	0.0845221	3.18366	0.00145424
chr5	87006121-87006122	0.372732	0.657991	-0.285258	0.0932765	-3.0582	0.0022267
chr5	5318016-5318017	0.969426	0.719428	0.249999	0.0756772	3.30349	0.000954898
chr5	73252660-73252661	0.938359	0.688447	0.249912	0.0758514	3.29476	0.000985067
chr5	28754058-28754059	0.881515	0.611507	0.270008	0.0861839	3.13293	0.00173073
chr5	4024959-4024960	0.194634	0.465646	-0.271012	0.0866997	-3.12587	0.00177281
chr5	136003809-136003810	0.622184	0.901174	-0.27899	0.091364	-3.05361	0.00226106
chr5	98611320-98611321	0.961872	0.736226	0.225647	0.0642136	3.514	0.000441412
chr5	123091249-123091250	0.818339	0.531415	0.286925	0.0957892	2.99538	0.00274105
chr5	13176993-13176994	0.80185	0.514034	0.287816	0.0964092	2.98536	0.00283247
chr5	123140587-123140588	0.0567135	0.282635	-0.225922	0.0651297	-3.4688	0.000522796
chr5	31378618-31378619	0.88986	0.610799	0.279061	0.092767	3.00819	0.00262806
chr5	138110957-138110958	0.738419	0.981511	-0.243092	0.0745104	-3.26252	0.00110425
chr5	11912575-11912576	0.802631	0.5422	0.26043	0.0836176	3.11454	0.00184233
chr5	101619752-101619753	0.881627	0.589635	0.291992	0.100198	2.91414	0.00356665
chr5	4666684-4666685	0.974617	0.728376	0.246241	0.0767361	3.20893	0.00133231
chr5	124039737-124039738	0.932598	0.672921	0.259678	0.0838843	3.09566	0.00196373
chr5	28462903-28462904	0.516026	0.231278	0.284748	0.0975069	2.92029	0.00349711
chr5	77530108-77530109	0.978477	0.755739	0.222737	0.065039	3.42468	0.000615535
chr5	73138653-73138654	0.273964	0.554224	-0.28026	0.0955791	-2.93223	0.00336538
chr5	90510917-90510918	0.579765	0.310506	0.269259	0.0900157	2.99125	0.00277839
chr5	77006718-77006719	0.785788	0.50349	0.282299	0.0970309	2.90937	0.0036216
chr5	8921014-8921015	0.499463	0.221016	0.278448	0.095282	2.92236	0.00347395
chr5	41613319-41613320	0.896321	0.636581	0.259741	0.0855586	3.03583	0.00239878
chr5	105939394-105939395	0.506563	0.227637	0.278926	0.0963623	2.89455	0.00379697
chr5	81467943-81467944	0.671306	0.3965	0.274806	0.0949102	2.89543	0.00378637
chr5	101701303-101701304	0.573856	0.293028	0.280828	0.0984139	2.85354	0.0043235
chr5	124450620-124450621	0.518003	0.800879	-0.282876	0.0997206	-2.83669	0.00455842
chr5	19223390-19223391	0.738464	0.464321	0.274143	0.0951359	2.88159	0.00395674
chr5	21394788-21394789	0.969467	0.746935	0.222532	0.066942	3.32424	0.000886588
chr5	85177695-85177696	0.888619	0.651031	0.237589	0.0752172	3.1587	0.00158473
chr5	9449922-9449923	0.796355	0.53229	0.264065	0.0897715	2.94153	0.00326599
chr5	8927894-8927895	0.80637	0.550056	0.256314	0.0856565	2.99235	0.00276839
chr5	50606950-50606951	0.937224	0.70216	0.235065	0.0744334	3.15805	0.00158827
chr5	31295118-31295119	0.473294	0.197495	0.275799	0.0971682	2.83837	0.00453447
chr5	68905760-68905761	0.605254	0.340354	0.2649	0.0911739	2.90544	0.00366741
chr5	64264372-64264373	0.426254	0.696786	-0.270532	0.0946203	-2.85914	0.00424793
chr5	133311113-133311114	0.857785	0.598979	0.258806	0.0882047	2.93415	0.00334462
chr5	35739430-35739431	0.918322	0.666463	0.251859	0.0845083	2.98028	0.00287981
chr5	114463376-114463377	0.698851	0.415144	0.283707	0.102354	2.77183	0.00557426
chr5	114549188-114549189	0.907558	0.659747	0.247812	0.0826058	2.99993	0.0027004
chr5	59483841-59483842	0.789575	0.527907	0.261668	0.090917	2.8781	0.00400075
chr5	91524424-91524425	0.978406	0.756547	0.22186	0.0686553	3.2315	0.00123142
chr5	99906794-99906795	0.519369	0.799259	-0.27989	0.10143	-2.75945	0.00578989
chr5	118661499-118661500	0.345574	0.69769	-0.352117	0.143506	-2.45368	0.0141404
chr5	118559672-118559673	0.0594852	0.308801	-0.249316	0.084745	-2.94195	0.00326148
chr5	5536730-5536731	0.971711	0.716959	0.254752	0.0881967	2.88845	0.00387144
chr5	115458213-115458214	0.880429	0.634172	0.246257	0.0834325	2.95158	0.00316154
chr5	121115972-121115973	0.419413	0.159501	0.259912	0.0913611	2.84489	0.00444265
chr5	8632455-8632456	0.441701	0.170956	0.270745	0.0977102	2.7709	0.00559018
chr5	118361775-118361776	0.94189	0.702136	0.239755	0.0799525	2.99871	0.00271122
chr5	116979370-116979371	0.962898	0.73679	0.226107	0.0721616	3.13335	0.00172824
chr5	124453483-124453484	0.506635	0.786044	-0.279409	0.102744	-2.71946	0.00653885
chr5	115424636-115424637	0.949998	0.705633	0.244365	0.0827146	2.95432	0.00313361
chr5	144567938-144567939	0.91815	0.672616	0.245534	0.0834721	2.94151	0.00326615
chr5	131421107-131421108	0.704523	0.438497	0.266027	0.0953197	2.79089	0.00525635
chr5	122353794-122353795	0.135835	0.390236	-0.254401	0.0887756	-2.86566	0.00416145
chr5	61709413-61709414	0.910501	0.657665	0.252836	0.0879291	2.87545	0.00403446
chr5	52439257-52439258	0.997101	0.793471	0.20363	0.0596847	3.41177	0.000645435
chr5	94417187-94417188	0.91012	0.672709	0.237412	0.0792799	2.9946	0.00274801
chr5	124541983-124541984	0.825891	0.563901	0.26199	0.0937307	2.79514	0.00518772
chr5	18673194-18673195	0.704215	0.447407	0.256809	0.0908083	2.82803	0.00468353
chr5	111528049-111528050	0.926722	0.683988	0.242734	0.082674	2.93604	0.0033243
chr5	49038321-49038322	0.91009	0.683606	0.226485	0.0733839	3.0863	0.00202664
chr5	52609416-52609417	0.973969	0.754208	0.219761	0.0698734	3.14513	0.00166013
chr5	102558040-102558041	0.902445	0.661635	0.240811	0.0822127	2.92912	0.00339922
chr5	43821816-43821817	0.871788	0.624541	0.247247	0.0859987	2.87501	0.00404021
chr5	3634132-3634133	0.550004	0.291754	0.25825	0.0924628	2.79301	0.00522201
chr5	101859528-101859529	0.577479	0.306612	0.270867	0.0999777	2.70927	0.00674306
chr5	70180091-70180092	0.763459	0.490839	0.27262	0.10132	2.69068	0.00713056
chr5	18253506-18253507	0.460066	0.204037	0.25603	0.0916256	2.7943	0.00520121
chr5	137997407-137997408	0.668186	0.412493	0.255693	0.0916152	2.79095	0.00525536
chr5	106425893-106425894	0.968619	0.760181	0.208438	0.0639261	3.26061	0.00111174
chr5	119851079-119851080	0.79078	0.538755	0.252024	0.0897598	2.80776	0.00498867
chr5	115865467-115865468	0.995738	0.783525	0.212213	0.0662666	3.20242	0.0013628
chr5	90512471-90512472	0.597972	0.324714	0.273258	0.102433	2.66768	0.0076377
chr5	74965943-74965944	0.979331	0.754776	0.224554	0.0738331	3.04138	0.00235496
chr5	68471620-68471621	0.918878	0.683127	0.235751	0.0807725	2.9187	0.0035149
chr5	85848327-85848328	0.931888	0.707208	0.22468	0.0742745	3.025	0.00248633
chr5	114293202-114293203	0.964244	0.73574	0.228504	0.0765553	2.98482	0.00283749
chr5	80812411-80812412	0.892139	0.649372	0.242768	0.0851366	2.8515	0.00435128
chr5	33513145-33513146	0.625765	0.871962	-0.246196	0.087555	-2.81191	0.00492489
chr5	129048747-129048748	0.50277	0.234757	0.268013	0.100686	2.66187	0.00777073
chr5	14865639-14865640	0.921895	0.705605	0.21629	0.069669	3.10454	0.00190576
chr5	39361238-39361239	0.639455	0.382071	0.257384	0.094939	2.71105	0.00670714
chr5	48500360-48500361	0.656795	0.393637	0.263158	0.0984451	2.67314	0.0075144
chr5	138783534-138783535	0.666518	0.908961	-0.242443	0.0859454	-2.82089	0.00478902
chr5	69617518-69617519	0.707627	0.463129	0.244499	0.0873306	2.79969	0.0051151
chr5	111919275-111919276	0.656835	0.383865	0.272971	0.104955	2.60083	0.00929982
chr5	67767695-67767696	0.921547	0.695452	0.226095	0.0765546	2.95338	0.00314315
chr5	92643970-92643971	0.941287	0.720917	0.22037	0.0731134	3.01408	0.00257757
chr5	148495086-148495087	0.554527	0.816441	-0.261914	0.0984818	-2.65952	0.00782529
chr6	148355142-148355143	0.0826988	0.696329	-0.61363	0.0897641	-6.83603	8.14154e-12
chr6	86473380-86473381	0.380186	0.856604	-0.476419	0.0887352	-5.36899	7.91767e-08
chr6	148355442-148355443	0.463433	0.938745	-0.475311	0.090703	-5.2403	1.60312e-07
chr6	30693053-30693054	0.428894	0.84419	-0.415296	0.0939828	-4.41885	9.92266e-06
chr6	141867172-141867173	0.496314	0.865019	-0.368705	0.080533	-4.57832	4.68732e-06
chr6	141867085-141867086	0.514264	0.860867	-0.346603	0.0865156	-4.00625	6.16896e-05
chr6	24610734-24610735	0.946427	0.601204	0.345223	0.0867975	3.97734	6.96915e-05
chr6	16055951-16055952	0.803913	0.448458	0.355455	0.0906949	3.91924	8.88285e-05
chr6	86473105-86473106	0.124615	0.46564	-0.341025	0.0860382	-3.96364	7.38143e-05
chr6	86473376-86473377	0.566151	0.934208	-0.368057	0.0970212	-3.79358	0.000148492
chr6	140266197-140266198	0.950491	0.623463	0.327028	0.0852924	3.8342	0.000125975
chr6	135197100-135197101	0.953621	0.624801	0.32882	0.0861171	3.8183	0.000134377
chr6	86473134-86473135	0.265192	0.610743	-0.345551	0.0951801	-3.6305	0.00028287
chr6	50753504-50753505	0.917199	0.609787	0.307412	0.0811109	3.79002	0.000150635
chr6	146927575-146927576	0.864622	0.562681	0.301941	0.0796567	3.79053	0.000150327
chr6	83690287-83690288	0.162376	0.473333	-0.310957	0.0879501	-3.53561	0.000406837
chr6	95997359-95997360	0.714641	0.390826	0.323816	0.0938704	3.4496	0.000561413
chr6	50353698-50353699	0.909939	0.612728	0.297211	0.0839004	3.54243	0.00039646
chr6	55918748-55918749	0.856007	0.539309	0.316699	0.0926948	3.41657	0.000634144
chr6	143491574-143491575	0.94661	0.627433	0.319177	0.0955222	3.34139	0.000833601
chr6	143606896-143606897	0.897679	0.559952	0.337726	0.104642	3.22746	0.00124894
chr6	60105813-60105814	0.956974	0.710012	0.246962	0.0653871	3.77692	0.000158779
chr6	11689081-11689082	0.855986	0.575512	0.280474	0.0805509	3.48194	0.000497794
chr6	100209499-100209500	0.83575	0.531947	0.303803	0.0913664	3.32511	0.000883847
chr6	143525332-143525333	0.750618	0.431363	0.319255	0.101552	3.14378	0.00166782
chr6	73746442-73746443	0.695248	0.395299	0.299949	0.0928825	3.22934	0.00124078
chr6	79092718-79092719	0.201025	0.640555	-0.43953	0.160323	-2.74153	0.00611533
chr6	49914780-49914781	0.896334	0.622062	0.274272	0.0824847	3.32513	0.000883789
chr6	122686098-122686099	0.964923	0.715422	0.249501	0.0709697	3.5156	0.000438769
chr6	117298772-117298773	0.25433	0.539158	-0.284828	0.0877519	-3.24584	0.00117106
chr6	5596009-5596010	0.80399	0.513703	0.290287	0.0906659	3.20173	0.00136607
chr6	74540089-74540090	0.514247	0.21252	0.301726	0.0961243	3.13892	0.00169573
chr6	134073471-134073472	0.298241	0.675786	-0.377545	0.136203	-2.77192	0.00557271
chr6	23268877-23268878	0.649272	0.367623	0.281649	0.089894	3.13312	0.00172956
chr6	57309209-57309210	0.970754	0.673298	0.297456	0.0977422	3.04327	0.00234019
chr6	144419784-144419785	0.154112	0.433121	-0.27901	0.0888612	-3.13983	0.00169044
chr6	94125294-94125295	0.624332	0.887684	-0.263352	0.0811129	-3.24674	0.00116735
chr6	135113125-135113126	0.820992	0.545577	0.275415	0.0882331	3.12145	0.00179964
chr6	53507135-53507136	0.674949	0.393031	0.281918	0.0920834	3.06155	0.00220195
chr6	3741410-3741411	0.941063	0.688095	0.252968	0.0778178	3.25077	0.00115093
chr6	140660581-140660582	0.997601	0.701354	0.296247	0.09998	2.96306	0.00304594
chr6	32594973-32594974	0.673186	0.386482	0.286704	0.0954548	3.00356	0.00266843
chr6	114094541-114094542	0.950093	0.684915	0.265178	0.0846464	3.13277	0.00173167
chr6	12276027-12276028	0.79241	0.514546	0.277863	0.0913886	3.04046	0.00236218
chr6	126280460-126280461	0.777077	0.489706	0.287371	0.0963069	2.98391	0.00284593
chr6	90897549-90897550	0.90557	0.662912	0.242658	0.0734373	3.30429	0.000952171
chr6	136916597-136916598	0.399425	0.693919	-0.294493	0.100406	-2.93304	0.00335665
chr6	61585723-61585724	0.808444	0.530247	0.278197	0.0927829	2.99836	0.00271436
chr6	12257961-12257962	0.667645	0.383634	0.284011	0.0966531	2.93846	0.00329852
chr6	18367743-18367744	0.614515	0.315035	0.29948	0.105336	2.8431	0.00446769
chr6	78199372-78199373	0.775075	0.499306	0.275769	0.0927818	2.97223	0.00295646
chr6	133415327-133415328	0.863986	0.606069	0.257918	0.0836376	3.08376	0.00204405
chr6	118165066-118165067	0.854712	0.590467	0.264245	0.0872845	3.0274	0.00246668
chr6	8996004-8996005	0.947114	0.712887	0.234227	0.0714238	3.2794	0.00104027
chr6	140279936-140279937	0.350972	0.0946779	0.256294	0.0832851	3.07731	0.00208877
chr6	148354911-148354912	0.014179	0.243549	-0.22937	0.0693326	-3.30826	0.000938778
chr6	122609376-122609377	0.523424	0.799535	-0.276111	0.094536	-2.92069	0.00349254
chr6	144203371-144203372	0.855333	0.583508	0.271825	0.0928828	2.92654	0.00342757
chr6	82970846-82970847	0.321278	0.0863378	0.234941	0.0729497	3.22058	0.00127931
chr6	137967327-137967328	0.822163	0.557605	0.264557	0.0891666	2.967	0.00300724
chr6	120125591-120125592	0.124972	0.412345	-0.287373	0.101697	-2.82579	0.00471649
chr6	14996188-14996189	0.487797	0.761502	-0.273704	0.0950044	-2.88097	0.00396458
chr6	45381357-45381358	0.566697	0.830408	-0.263711	0.089536	-2.94531	0.00322631
chr6	122465561-122465562	0.805896	0.526326	0.27957	0.09837	2.84203	0.00448277
chr6	14944395-14944396	0.840476	0.581308	0.259168	0.0872871	2.96914	0.00298632
chr6	41312512-41312513	0.848533	0.589961	0.258572	0.087054	2.97025	0.00297561
chr6	148354300-148354301	0.729497	0.955151	-0.225654	0.0689943	-3.27061	0.00107315
chr6	86473032-86473033	0.121093	0.384136	-0.263043	0.0896458	-2.93424	0.00334362
chr6	76186883-76186884	0.743912	0.478887	0.265026	0.0919659	2.88178	0.00395432
chr6	12055515-12055516	0.686119	0.927302	-0.241183	0.0791373	-3.04765	0.00230638
chr6	77559674-77559675	0.477234	0.220168	0.257066	0.0882291	2.91361	0.0035727
chr6	113179602-113179603	0.738829	0.435371	0.303459	0.114493	2.65045	0.0080385
chr6	22340477-22340478	0.799976	0.53687	0.263106	0.091694	2.86939	0.00411262
chr6	114094018-114094019	0.914981	0.671107	0.243874	0.0809331	3.01327	0.00258445
chr6	31213690-31213691	0.400289	0.689962	-0.289673	0.106943	-2.70868	0.00675525
chr6	4557557-4557558	0.775024	0.502894	0.27213	0.0970698	2.80344	0.00505602
chr6	135576031-135576032	0.566566	0.301744	0.264822	0.0930097	2.84726	0.00440977
chr6	137665767-137665768	0.852446	0.610569	0.241877	0.0801679	3.01713	0.00255178
chr6	144388060-144388061	0.917435	0.667455	0.249981	0.0850243	2.94011	0.003281
chr6	87381112-87381113	0.882114	0.633644	0.24847	0.0843185	2.9468	0.00321077
chr6	124143664-124143665	0.734946	0.466602	0.268344	0.0956863	2.80441	0.0050408
chr6	47942764-47942765	0.0245049	0.2439	-0.219395	0.0683395	-3.21037	0.00132564
chr6	129228684-129228685	0.822353	0.557268	0.265085	0.0952657	2.78259	0.00539274
chr6	80709900-80709901	0.105724	0.353656	-0.247932	0.0854717	-2.90075	0.0037227
chr6	117152045-117152046	0.555221	0.279646	0.275576	0.101569	2.71317	0.0066642
chr6	87247566-87247567	0.851896	0.593867	0.258029	0.0919116	2.80736	0.00499494
chr6	140388899-140388900	0.969022	0.679092	0.28993	0.110668	2.61982	0.00879754
chr6	117559482-117559483	0.789756	0.531568	0.258188	0.0921081	2.8031	0.00506141
chr6	45085490-45085491	0.435023	0.191162	0.243861	0.0837518	2.91171	0.00359456
chr6	26456138-26456139	0.83686	0.593744	0.243116	0.0835122	2.91115	0.00360104
chr6	59496674-59496675	0.748544	0.501195	0.247349	0.0863423	2.86475	0.00417344
chr6	140378963-140378964	0.982702	0.721913	0.260789	0.0945568	2.75801	0.00581538
chr6	81882265-81882266	0.301722	0.557975	-0.256254	0.0920263	-2.78457	0.00535989
chr6	18969289-18969290	0.514382	0.261017	0.253365	0.0905241	2.79887	0.00512815
chr6	21719951-21719952	0.708369	0.439559	0.26881	0.0999357	2.68983	0.00714884
chr6	116636384-116636385	0.237355	0.49678	-0.259425	0.0944329	-2.74719	0.00601082
chr6	21090686-21090687	0.80542	0.568457	0.236964	0.0811099	2.92151	0.00348337
chr6	112035506-112035507	0.977356	0.783336	0.19402	0.055807	3.47662	0.000507783
chr6	24296933-24296934	0.871163	0.630201	0.240962	0.0837272	2.87794	0.00400277
chr6	48835618-48835619	0.884274	0.625731	0.258543	0.0942591	2.7429	0.00608993
chr6	125573171-125573172	0.457635	0.200772	0.256862	0.0933693	2.75104	0.0059407
chr6	61848084-61848085	0.761965	0.50446	0.257505	0.0937723	2.74607	0.00603141
chr6	128581882-128581883	0.98067	0.777945	0.202725	0.0611788	3.31365	0.000920872
chr6	144755762-144755763	0.733147	0.478917	0.25423	0.092099	2.7604	0.00577313
chr6	137677001-137677002	0.976806	0.771407	0.205399	0.0629539	3.26268	0.00110363
chr6	75352994-75352995	0.863867	0.62417	0.239697	0.0835813	2.86783	0.00413302
chr6	99896645-99896646	0.938595	0.71542	0.223175	0.0736898	3.02858	0.00245707
chr6	22761197-22761198	0.838478	0.601446	0.237032	0.0819977	2.89072	0.00384362
chr6	63176531-63176532	0.912946	0.684307	0.228639	0.0770151	2.96875	0.00299013
chr6	116195803-116195804	0.921117	0.679215	0.241901	0.0850452	2.84438	0.00444973
chr6	132947492-132947493	0.827669	0.574071	0.253598	0.0922259	2.74975	0.00596405
chr6	143642260-143642261	0.92035	0.687503	0.232847	0.0797448	2.9199	0.00350142
chr6	144457396-144457397	0.230873	0.486036	-0.255163	0.0934785	-2.72965	0.00634018
chr6	51836231-51836232	0.886469	0.660376	0.226093	0.0761232	2.97009	0.00297712
chr6	140699596-140699597	0.976779	0.731795	0.244984	0.0876738	2.79426	0.00520182
chr6	114419642-114419643	0.987672	0.775919	0.211752	0.067566	3.13401	0.00172436
chr6	57525075-57525076	0.933709	0.700796	0.232913	0.0804394	2.89551	0.00378541
chr6	70829500-70829501	0.806029	0.545319	0.26071	0.0974291	2.6759	0.00745291
chr7	34189004-34189005	0.892904	0.375833	0.517071	0.105305	4.91022	9.09726e-07
chr7	44184787-44184788	0.0118377	0.48129	-0.469452	0.102349	-4.58677	4.50165e-06
chr7	43633738-43633739	0.0155543	0.396974	-0.38142	0.0820972	-4.64595	3.38512e-06
chr7	133336012-133336013	0.775266	0.36502	0.410245	0.0929085	4.41559	1.00736e-05
chr7	34109669-34109670	0.883016	0.333097	0.549919	0.136029	4.04267	5.28456e-05
chr7	97696206-97696207	0.584618	0.961536	-0.376919	0.0844656	-4.46239	8.10494e-06
chr7	44581383-44581384	0.014032	0.376668	-0.362636	0.0859097	-4.22113	2.4308e-05
chr7	33556716-33556717	0.843656	0.378048	0.465608	0.119726	3.88894	0.000100685
chr7	43665038-43665039	0.0279981	0.375748	-0.34775	0.0841738	-4.13134	3.60654e-05
chr7	97696210-97696211	0.337156	0.744855	-0.407699	0.105516	-3.86384	0.000111617
chr7	33481512-33481513	0.858108	0.372702	0.485406	0.137731	3.52431	0.000424581
chr7	114648883-114648884	0.781348	0.41959	0.361758	0.0966753	3.74199	0.000182567
chr7	135635389-135635390	0.929244	0.614079	0.315165	0.0797583	3.95151	7.76606e-05
chr7	43875601-43875602	0.0244935	0.340395	-0.315901	0.0808631	-3.90661	9.3599e-05
chr7	33548167-33548168	0.819414	0.337098	0.482315	0.144465	3.33862	0.000841956
chr7	50097959-50097960	0.423172	0.757769	-0.334596	0.0899647	-3.7192	0.000199858
chr7	127253754-127253755	0.148743	0.504749	-0.356006	0.0993309	-3.58404	0.00033832
chr7	132165457-132165458	0.796278	0.461273	0.335005	0.0916659	3.65463	0.000257558
chr7	40053878-40053879	0.703924	0.354399	0.349524	0.0993225	3.51909	0.000433033
chr7	33648881-33648882	0.679545	0.270198	0.409347	0.124476	3.28856	0.00100702
chr7	143705062-143705063	0.920009	0.609842	0.310167	0.0859975	3.6067	0.000310122
chr7	35323170-35323171	0.840448	0.515351	0.325097	0.0954304	3.40664	0.000657678
chr7	33598998-33598999	0.690838	0.303272	0.387566	0.122092	3.17438	0.00150157
chr7	45298376-45298377	0.289588	0.654706	-0.365118	0.117218	-3.11488	0.00184022
chr7	37185685-37185686	0.119896	0.521816	-0.40192	0.137974	-2.91301	0.00357961
chr7	143079491-143079492	0.74996	0.447095	0.302865	0.0929223	3.25933	0.00111674
chr7	91474800-91474801	0.604169	0.303297	0.300872	0.0929812	3.23583	0.00121288
chr7	80234150-80234151	0.86488	0.580401	0.284479	0.0859357	3.31037	0.000931724
chr7	36416655-36416656	0.927242	0.648524	0.278718	0.0839388	3.32049	0.000898581
chr7	16402339-16402340	0.480318	0.151773	0.328545	0.107866	3.04585	0.00232024
chr7	67648435-67648436	0.291594	0.0448789	0.246715	0.0693454	3.55777	0.000374014
chr7	110281690-110281691	0.932109	0.651462	0.280647	0.085735	3.27343	0.00106252
chr7	48124129-48124130	0.823026	0.518644	0.304382	0.0977241	3.11471	0.00184126
chr7	87253370-87253371	0.534214	0.228434	0.30578	0.0984559	3.10576	0.0018979
chr7	34072895-34072896	0.841165	0.467785	0.37338	0.131006	2.85009	0.00437067
chr7	43765757-43765758	0.0115781	0.261979	-0.250401	0.0720224	-3.47672	0.000507597
chr7	117723421-117723422	0.726516	0.423815	0.3027	0.0971925	3.11444	0.00184294
chr7	25154527-25154528	0.974826	0.730137	0.244689	0.0697961	3.50577	0.000455294
chr7	54355829-54355830	0.914252	0.662055	0.252197	0.0746731	3.37735	0.000731872
chr7	36675918-36675919	0.794495	0.484371	0.310124	0.103865	2.98583	0.00282812
chr7	33645718-33645719	0.8177	0.417701	0.399999	0.149206	2.68086	0.00734338
chr7	107218191-107218192	0.737049	0.458334	0.278716	0.0892485	3.12292	0.00179069
chr7	34086737-34086738	0.739449	0.380165	0.359283	0.130768	2.74749	0.0060053
chr7	141394366-141394367	0.520091	0.23651	0.283581	0.0925186	3.06513	0.00217577
chr7	55871578-55871579	0.977975	0.745396	0.232579	0.066866	3.47829	0.000504631
chr7	64177035-64177036	0.888024	0.636529	0.251496	0.076593	3.28353	0.00102516
chr7	101534371-101534372	0.762014	0.463283	0.298732	0.100647	2.96812	0.00299631
chr7	63366715-63366716	0.658381	0.352105	0.306276	0.106319	2.88071	0.00396775
chr7	109518193-109518194	0.120915	0.386551	-0.265637	0.0854502	-3.10867	0.00187931
chr7	87851472-87851473	0.717876	0.424471	0.293405	0.100216	2.92773	0.0034145
chr7	135399678-135399679	0.919722	0.672652	0.24707	0.0762515	3.2402	0.00119447
chr7	35980842-35980843	0.677673	0.918407	-0.240734	0.0730076	-3.29738	0.000975903
chr7	18748475-18748476	0.1884	0.457527	-0.269128	0.0881584	-3.05277	0.00226737
chr7	128164415-128164416	0.922154	0.680422	0.241733	0.0739681	3.26807	0.00108284
chr7	129061619-129061620	0.829675	0.563872	0.265804	0.0866301	3.06826	0.00215309
chr7	46241898-46241899	0.408677	0.754594	-0.345918	0.128852	-2.68461	0.00726138
chr7	29965122-29965123	0.574815	0.858103	-0.283288	0.0959669	-2.95193	0.00315793
chr7	107233458-107233459	0.930164	0.681852	0.248312	0.0777845	3.19231	0.00141141
chr7	92666382-92666383	0.867303	0.602279	0.265024	0.0866274	3.05935	0.00221819
chr7	118614300-118614301	0.931387	0.685446	0.245941	0.0770445	3.19219	0.00141196
chr7	101378588-101378589	0.298947	0.0279376	0.27101	0.0903074	3.00097	0.00269119
chr7	137230696-137230697	0.852027	0.578213	0.273814	0.0919724	2.97713	0.00290958
chr7	98352903-98352904	0.666364	0.368654	0.29771	0.104659	2.84458	0.00444695
chr7	133868183-133868184	0.850249	0.57261	0.27764	0.0940137	2.95318	0.00314515
chr7	10136845-10136846	0.180161	0.457622	-0.277461	0.094059	-2.94986	0.00317919
chr7	49683905-49683906	0.72407	0.436263	0.287807	0.099583	2.89012	0.00385098
chr7	34229391-34229392	0.262852	0.0139771	0.248875	0.0793861	3.13499	0.00171858
chr7	97453066-97453067	0.520738	0.245007	0.275731	0.0941193	2.92959	0.0033941
chr7	134216041-134216042	0.775332	0.50909	0.266242	0.0892077	2.98452	0.00284028
chr7	142895737-142895738	0.746885	0.451728	0.295157	0.104821	2.81582	0.00486529
chr7	137301788-137301789	0.637426	0.32974	0.307686	0.111664	2.75547	0.0058608
chr7	31951598-31951599	0.738916	0.46189	0.277026	0.0953678	2.90482	0.0036747
chr7	33882063-33882064	0.91234	0.659045	0.253294	0.0830706	3.04914	0.00229494
chr7	43786183-43786184	0.934504	0.674071	0.260433	0.0871346	2.98886	0.00280021
chr7	62185099-62185100	0.835075	0.583359	0.251716	0.0826673	3.04493	0.00232735
chr7	128612912-128612913	0.300172	0.0661387	0.234033	0.0732612	3.19451	0.00140069
chr7	57807052-57807053	0.748156	0.482902	0.265254	0.0904836	2.93151	0.00337315
chr7	134349185-134349186	0.388338	0.13148	0.256857	0.0860718	2.98422	0.002843
chr7	135460763-135460764	0.342016	0.0899829	0.252033	0.0836319	3.01359	0.00258172
chr7	24825115-24825116	0.996474	0.770883	0.225592	0.0690968	3.26486	0.00109517
chr7	123709562-123709563	0.9115	0.675248	0.236252	0.0750529	3.14781	0.00164498
chr7	122066693-122066694	0.0315024	0.265086	-0.233584	0.0739379	-3.15919	0.00158208
chr7	128010326-128010327	0.7551	0.995461	-0.24036	0.077958	-3.08321	0.00204783
chr7	116606396-116606397	0.843834	0.585504	0.25833	0.0880617	2.93351	0.00335148
chr7	28871057-28871058	0.378427	0.11517	0.263256	0.0908646	2.89724	0.00376464
chr7	67760226-67760227	0.877327	0.624909	0.252418	0.0848232	2.97581	0.00292215
chr7	34095050-34095051	0.678486	0.337622	0.340863	0.134712	2.53031	0.011396
chr7	33934848-33934849	0.748136	0.383238	0.364898	0.148742	2.45324	0.0141578
chr7	137925052-137925053	0.332662	0.613998	-0.281336	0.101297	-2.77734	0.00548053
chr7	37202351-37202352	0.184615	0.611418	-0.426803	0.185628	-2.29923	0.0214917
chr7	132364378-132364379	0.861126	0.607053	0.254073	0.0864214	2.93993	0.00328283
chr7	34195504-34195505	0.805924	0.544562	0.261363	0.0906562	2.88301	0.00393895
chr7	37301717-37301718	0.232118	0.616709	-0.384591	0.161551	-2.38062	0.0172833
chr7	48985587-48985588	0.860344	0.600636	0.259708	0.0905491	2.86814	0.00412887
chr7	62379136-62379137	0.99637	0.751022	0.245348	0.0824972	2.97401	0.00293932
chr7	36864903-36864904	0.517143	0.225882	0.29126	0.109224	2.66663	0.00766167
chr7	79274683-79274684	0.356084	0.115153	0.240932	0.0804322	2.99546	0.00274029
chr7	114778888-114778889	0.737659	0.461977	0.275682	0.100475	2.74378	0.00607357
chr7	31072272-31072273	0.996367	0.791939	0.204428	0.0598631	3.41493	0.000637975
chr7	84059267-84059268	0.846092	0.58766	0.258431	0.0911344	2.83572	0.00457231
chr7	19737369-19737370	0.909922	0.667771	0.242152	0.0818505	2.95846	0.00309177
chr7	140622741-140622742	0.733565	0.456614	0.276951	0.101973	2.71592	0.00660913
chr7	54608116-54608117	0.771946	0.507756	0.264189	0.0946192	2.79213	0.00523618
chr7	80004476-80004477	0.867846	0.608092	0.259754	0.0920823	2.82089	0.00478908
chr7	66835941-66835942	0.844676	0.600817	0.243859	0.0832881	2.9279	0.00341257
chr7	141481708-141481709	0.713899	0.428751	0.285148	0.10768	2.64811	0.00809424
chr7	90759983-90759984	0.921526	0.694419	0.227107	0.0739238	3.07218	0.00212503
chr7	3181475-3181476	0.688799	0.926782	-0.237983	0.0804154	-2.95942	0.00308223
chr7	57553994-57553995	0.398969	0.152957	0.246012	0.0851112	2.89048	0.00384654
chr7	119044933-119044934	0.475669	0.220173	0.255496	0.0907152	2.81646	0.00485563
chr7	62875429-62875430	0.770859	0.51252	0.258339	0.0925977	2.78991	0.00527221
chr7	33722565-33722566	0.75513	0.494411	0.260719	0.0941012	2.77062	0.00559489
chr7	134377191-134377192	0.803847	0.529431	0.274416	0.102248	2.68384	0.00727816
chr7	45086409-45086410	0.67315	0.94283	-0.26968	0.100293	-2.68891	0.00716848
chr7	41739986-41739987	0.0517993	0.303188	-0.251389	0.0895079	-2.80857	0.00497624
chr7	37680243-37680244	0.810884	0.551021	0.259862	0.0946798	2.74464	0.00605767
chr7	31013003-31013004	0.347803	0.1096	0.238203	0.082001	2.90488	0.00367397
chr7	121594567-121594568	0.745763	0.962794	-0.217031	0.0699944	-3.10069	0.00193068
chr7	67351370-67351371	0.816201	0.577632	0.238569	0.0831286	2.86988	0.00410633
chr7	73485984-73485985	0.967914	0.739795	0.228119	0.0770454	2.96084	0.00306798
chr7	138176014-138176015	0.504018	0.249662	0.254356	0.0929371	2.73686	0.00620291
chr7	91202611-91202612	0.432365	0.185808	0.246557	0.0883362	2.79113	0.00525251
chr7	117260848-117260849	0.807945	0.5593	0.248644	0.0900449	2.76134	0.00575655
chr7	136280761-136280762	0.87039	0.626525	0.243865	0.0873063	2.79322	0.00521868
chr8	18463178-18463179	0.0155443	0.655465	-0.63992	0.0882498	-7.25124	4.12973e-13
chr8	93227169-93227170	0.556087	0.959425	-0.403337	0.0786438	-5.12866	2.91812e-07
chr8	114128912-114128913	0.31218	0.760382	-0.448202	0.0903511	-4.96067	7.025e-07
chr8	114128698-114128699	0.237807	0.65601	-0.418203	0.089586	-4.66818	3.03885e-06
chr8	122269075-122269076	0.36085	0.793964	-0.433114	0.101531	-4.26582	1.99166e-05
chr8	70626947-70626948	0.64618	0.204344	0.441835	0.110583	3.99551	6.45541e-05
chr8	20005505-20005506	0.962808	0.686842	0.275966	0.0605794	4.55545	5.22724e-06
chr8	28926447-28926448	0.503152	0.847723	-0.344571	0.0852142	-4.04358	5.26403e-05
chr8	122268941-122268942	0.457622	0.837624	-0.380002	0.0983811	-3.86255	0.00011221
chr8	20001878-20001879	0.947593	0.611674	0.335919	0.0835743	4.0194	5.83468e-05
chr8	20004890-20004891	0.887953	0.582455	0.305498	0.0779322	3.92005	8.85291e-05
chr8	19992470-19992471	0.970271	0.723345	0.246926	0.0559524	4.41315	1.01876e-05
chr8	67845373-67845374	0.606658	0.960828	-0.354171	0.0984281	-3.59827	0.000320343
chr8	44040973-44040974	0.584426	0.897899	-0.313473	0.0832787	-3.76415	0.000167119
chr8	36362100-36362101	0.678199	0.334717	0.343482	0.0957817	3.58609	0.000335669
chr8	73958123-73958124	0.563481	0.924016	-0.360535	0.104257	-3.45813	0.000543946
chr8	28724152-28724153	0.527571	0.866477	-0.338906	0.0966321	-3.50718	0.000452883
chr8	19988349-19988350	0.971003	0.703789	0.267213	0.0676628	3.94919	7.84146e-05
chr8	73952944-73952945	0.586677	0.946718	-0.360041	0.105426	-3.41512	0.000637548
chr8	19999304-19999305	0.80544	0.485427	0.320013	0.0930358	3.43967	0.000582414
chr8	122269194-122269195	0.0509422	0.335964	-0.285021	0.0794907	-3.5856	0.000336309
chr8	46807278-46807279	0.6219	0.920941	-0.299041	0.0859934	-3.47749	0.000506127
chr8	70210557-70210558	0.444853	0.142286	0.302567	0.0878113	3.44564	0.0005697
chr8	34918460-34918461	0.165595	0.476139	-0.310544	0.0915227	-3.39308	0.000691119
chr8	49184201-49184202	0.912257	0.636012	0.276245	0.0775358	3.56281	0.000366904
chr8	28093640-28093641	0.570855	0.881811	-0.310956	0.0934506	-3.32749	0.00087633
chr8	128159320-128159321	0.979712	0.716842	0.262869	0.072555	3.62304	0.000291162
chr8	56425574-56425575	0.648478	0.306151	0.342326	0.109053	3.1391	0.0016947
chr8	122268958-122268959	0.682431	0.964225	-0.281794	0.0819069	-3.44042	0.000580819
chr8	28925438-28925439	0.612585	0.913516	-0.300931	0.0907923	-3.3145	0.000918064
chr8	84719941-84719942	0.969465	0.719488	0.249977	0.0678204	3.68588	0.000227918
chr8	81240362-81240363	0.85218	0.528109	0.32407	0.101839	3.18218	0.00146169
chr8	93227107-93227108	0.457963	0.766644	-0.308681	0.0948823	-3.2533	0.00114074
chr8	70073640-70073641	0.389363	0.104255	0.285108	0.0844043	3.37788	0.000730473
chr8	20008428-20008429	0.942794	0.694165	0.248629	0.0679636	3.65827	0.000253925
chr8	47764656-47764657	0.597682	0.288138	0.309544	0.0962483	3.2161	0.00129947
chr8	64365432-64365433	0.783868	0.485238	0.29863	0.0920756	3.24331	0.00118149
chr8	109631444-109631445	0.981654	0.732547	0.249107	0.0692543	3.59699	0.000321925
chr8	20268253-20268254	0.92507	0.66332	0.26175	0.0753343	3.47451	0.000511788
chr8	123649390-123649391	0.858356	0.568966	0.289391	0.0884206	3.27289	0.00106455
chr8	36362102-36362103	0.70259	0.386996	0.315593	0.100689	3.13434	0.00172242
chr8	76445107-76445108	0.690034	0.379605	0.310429	0.0994215	3.12236	0.00179409
chr8	35088457-35088458	0.997054	0.733232	0.263822	0.0774549	3.40614	0.000658888
chr8	93226332-93226333	0.592338	0.867245	-0.274907	0.082843	-3.31841	0.000905314
chr8	122269052-122269053	0.517384	0.826287	-0.308903	0.0991068	-3.11688	0.00182779
chr8	20292679-20292680	0.959675	0.710939	0.248736	0.0706148	3.52244	0.000427596
chr8	84735149-84735150	0.917776	0.628418	0.289358	0.0904413	3.1994	0.00137713
chr8	4676712-4676713	0.436197	0.744601	-0.308403	0.100571	-3.06652	0.0021657
chr8	114399820-114399821	0.927762	0.647285	0.280477	0.0871421	3.21862	0.00128809
chr8	20004389-20004390	0.935003	0.681389	0.253614	0.0742504	3.41566	0.000636271
chr8	32729639-32729640	0.567553	0.860968	-0.293415	0.0937246	-3.1306	0.00174448
chr8	20003648-20003649	0.889732	0.599547	0.290185	0.0923363	3.1427	0.00167399
chr8	125681437-125681438	0.506627	0.210438	0.296189	0.0955598	3.09952	0.00193836
chr8	92182505-92182506	0.881443	0.610372	0.271071	0.0837937	3.23498	0.00121651
chr8	34918433-34918434	0.142781	0.437702	-0.294921	0.095682	-3.08231	0.00205403
chr8	121774909-121774910	0.850541	0.570056	0.280485	0.0885978	3.16583	0.00154643
chr8	28915243-28915244	0.568201	0.873104	-0.304903	0.100658	-3.02909	0.00245293
chr8	14334099-14334100	0.854895	0.571028	0.283867	0.091137	3.11473	0.00184114
chr8	106561426-106561427	0.464776	0.174716	0.290061	0.0943432	3.07453	0.00210837
chr8	45974635-45974636	0.532327	0.822176	-0.289849	0.0946093	-3.06364	0.0021866
chr8	93227156-93227157	0.541389	0.828721	-0.287332	0.0937348	-3.06537	0.00217399
chr8	113503009-113503010	0.345255	0.627818	-0.282562	0.0926625	-3.04937	0.00229322
chr8	93335995-93335996	0.543146	0.826739	-0.283593	0.0933691	-3.03733	0.00238685
chr8	56695739-56695740	0.916459	0.66378	0.252679	0.0776805	3.2528	0.00114275
chr8	53503862-53503863	0.678401	0.394189	0.284212	0.0938406	3.02867	0.00245636
chr8	48216729-48216730	0.922947	0.658336	0.26461	0.0840261	3.14914	0.00163749
chr8	118689240-118689241	0.964775	0.737058	0.227716	0.0654285	3.48038	0.000500698
chr8	22148714-22148715	0.907675	0.647685	0.259991	0.0821921	3.16321	0.00156042
chr8	80834558-80834559	0.0896432	0.335901	-0.246258	0.0760963	-3.23614	0.00121157
chr8	23341672-23341673	0.854723	0.588494	0.266229	0.086834	3.06595	0.00216978
chr8	70625766-70625767	0.67789	0.944306	-0.266417	0.0870984	-3.0588	0.00222223
chr8	95198917-95198918	0.892535	0.624026	0.268509	0.0882551	3.04242	0.00234683
chr8	28090727-28090728	0.44396	0.742383	-0.298423	0.104717	-2.84979	0.00437475
chr8	38345578-38345579	0.90949	0.66941	0.24008	0.0740789	3.24087	0.00119166
chr8	70546626-70546627	0.237365	0.511963	-0.274597	0.0924	-2.97183	0.00296031
chr8	80274812-80274813	0.936076	0.702858	0.233218	0.0709336	3.28783	0.00100963
chr8	74212302-74212303	0.680862	0.945323	-0.264462	0.0876655	-3.01671	0.00255531
chr8	128808056-128808057	0.859289	0.61437	0.244919	0.0774459	3.16245	0.00156447
chr8	25824778-25824779	0.996642	0.771187	0.225455	0.0673251	3.34875	0.000811761
chr8	20305323-20305324	0.701725	0.422611	0.279114	0.0963717	2.89622	0.00377683
chr8	76329384-76329385	0.816192	0.54134	0.274851	0.0940956	2.92098	0.00348933
chr8	12872590-12872591	0.654564	0.364343	0.29022	0.102745	2.82466	0.00473315
chr8	28668917-28668918	0.915713	0.677365	0.238349	0.0749709	3.17922	0.00147673
chr8	29011354-29011355	0.542232	0.821313	-0.279081	0.0971205	-2.87355	0.00405884
chr8	47742299-47742300	0.908429	0.649438	0.258992	0.0864722	2.99509	0.00274368
chr8	87368979-87368980	0.88521	0.629974	0.255236	0.0848461	3.00823	0.00262778
chr8	121949837-121949838	0.550513	0.280122	0.270391	0.093723	2.885	0.00391413
chr8	128879799-128879800	0.800167	0.539957	0.26021	0.0881382	2.9523	0.00315416
chr8	74090493-74090494	0.587153	0.854846	-0.267693	0.0925757	-2.89161	0.00383277
chr8	86213135-86213136	0.887073	0.631107	0.255967	0.0861137	2.97243	0.00295454
chr8	103653040-103653041	0.736797	0.468336	0.268461	0.0932501	2.87893	0.00399026
chr8	35088438-35088439	0.959811	0.728488	0.231323	0.0736661	3.14015	0.00168862
chr8	102644574-102644575	0.654514	0.396697	0.257817	0.0885851	2.91039	0.00360975
chr8	111857045-111857046	0.911521	0.670438	0.241083	0.0792608	3.04164	0.0023529
chr8	74459785-74459786	0.649177	0.921187	-0.27201	0.0966953	-2.81306	0.0049072
chr8	35088497-35088498	0.94938	0.680794	0.268586	0.0948485	2.83173	0.00462962
chr8	92171681-92171682	0.616274	0.345347	0.270927	0.0962764	2.81406	0.00489208
chr8	27450482-27450483	0.74476	0.477795	0.266964	0.0943397	2.82982	0.0046574
chr8	44040989-44040990	0.474417	0.767994	-0.293577	0.1099	-2.67131	0.00755562
chr8	35356223-35356224	0.862075	0.607896	0.254179	0.0874506	2.90655	0.00365444
chr8	122679713-122679714	0.866625	0.608955	0.25767	0.0895481	2.87745	0.00400899
chr8	74163433-74163434	0.629665	0.915805	-0.28614	0.105874	-2.70265	0.00687892
chr8	29224637-29224638	0.654077	0.394182	0.259895	0.0911274	2.85199	0.00434462
chr8	19980394-19980395	0.0253748	0.259299	-0.233924	0.0763404	-3.06422	0.00218236
chr8	45507920-45507921	0.216681	0.479227	-0.262546	0.0927175	-2.83168	0.00463041
chr8	71560836-71560837	0.922267	0.687099	0.235168	0.0771248	3.04919	0.00229459
chr8	28913118-28913119	0.761302	0.502242	0.25906	0.0909324	2.84893	0.00438662
chr8	119386334-119386335	0.721034	0.954304	-0.23327	0.076424	-3.05232	0.00227082
chr8	114128962-114128963	0.2126	0.473386	-0.260786	0.0923291	-2.82453	0.004735
chr8	80244101-80244102	0.920548	0.694465	0.226083	0.0724869	3.11895	0.00181497
chr8	16894641-16894642	0.859844	0.621175	0.238669	0.0800998	2.97965	0.00288582
chr8	15561504-15561505	0.979627	0.768872	0.210756	0.0639965	3.29324	0.000990406
chr8	96479985-96479986	0.853413	0.607491	0.245923	0.0844495	2.91207	0.00359046
chr8	44040988-44040989	0.471838	0.749292	-0.277454	0.103265	-2.68681	0.00721379
chr8	74119885-74119886	0.639889	0.903816	-0.263927	0.0954813	-2.76417	0.00570672
chr8	90931711-90931712	0.289013	0.0594405	0.229573	0.0754598	3.04232	0.00234766
chr8	35089210-35089211	0.93003	0.621051	0.308979	0.122366	2.52505	0.0115683
chr8	36351993-36351994	0.816202	0.537467	0.278735	0.104501	2.66731	0.00764614
chr8	89734938-89734939	0.315506	0.585651	-0.270145	0.0996264	-2.71158	0.00669639
chr8	7216608-7216609	0.803795	0.537798	0.265996	0.097226	2.73585	0.00622187
chr8	101852305-101852306	0.929281	0.70798	0.221301	0.0710917	3.1129	0.00185261
chr8	90253794-90253795	0.90779	0.674525	0.233265	0.0781155	2.98615	0.0028251
chr8	7919697-7919698	0.506884	0.237219	0.269665	0.099609	2.70724	0.00678459
chr8	90952154-90952155	0.872121	0.632234	0.239887	0.0822347	2.9171	0.00353304
chr8	28521840-28521841	0.585352	0.846881	-0.261529	0.0952016	-2.74711	0.00601227
chr8	48287504-48287505	0.659229	0.922017	-0.262788	0.0959707	-2.73821	0.00617748
chr8	35088532-35088533	0.938073	0.676641	0.261432	0.0955037	2.7374	0.00619276
chr8	66380610-66380611	0.889499	0.654991	0.234508	0.0795574	2.94766	0.00320189
chr8	36952979-36952980	0.469331	0.200851	0.26848	0.0998825	2.68796	0.007189
chr8	36351310-36351311	0.923373	0.636977	0.286395	0.110655	2.58818	0.00964849
chr8	86931200-86931201	0.779528	0.519462	0.260066	0.0951933	2.73197	0.00629562
chr8	49306671-49306672	0.884175	0.650081	0.234094	0.079843	2.93193	0.0033686
chr8	119857914-119857915	0.281201	0.0574925	0.223709	0.0736562	3.0372	0.00238786
chr8	55676500-55676501	0.835225	0.589275	0.245951	0.0869218	2.82956	0.00466113
chr8	117364960-117364961	0.450131	0.191493	0.258639	0.0947647	2.72927	0.0063474
chr8	49783417-49783418	0.798185	0.555448	0.242736	0.0853021	2.84561	0.00443268
chr8	13027502-13027503	0.571282	0.312384	0.258898	0.095063	2.72344	0.00646061
chr8	94737971-94737972	0.955024	0.736591	0.218433	0.070838	3.08355	0.00204544
chr8	40885084-40885085	0.45741	0.708656	-0.251246	0.090522	-2.77552	0.00551128
chr8	74534258-74534259	0.62549	0.879668	-0.254178	0.0925069	-2.74767	0.00600212
chr8	69902657-69902658	0.0329368	0.26577	-0.232834	0.0796888	-2.92179	0.00348031
chr8	72007025-72007026	0.811627	0.55217	0.259457	0.0957775	2.70896	0.00674951
chr8	23971044-23971045	0.825554	0.567645	0.257909	0.0948465	2.71922	0.00654358
chr8	11311983-11311984	0.460284	0.20377	0.256514	0.0940703	2.72683	0.00639459
chr8	99040325-99040326	0.817732	0.576076	0.241656	0.0851738	2.83721	0.00455094
chr8	34918540-34918541	0.187327	0.441882	-0.254555	0.0929671	-2.73812	0.00617921
chr8	110218703-110218704	0.432934	0.689079	-0.256146	0.0940096	-2.72467	0.0064365
chr8	106298479-106298480	0.912471	0.678936	0.233535	0.0808526	2.88841	0.00387198
chr8	121402171-121402172	0.963425	0.744367	0.219058	0.0722358	3.03253	0.00242509
chr9	48755555-48755556	0.425611	0.845282	-0.419671	0.10357	-4.05203	5.07746e-05
chr9	17126209-17126210	0.784338	0.442688	0.34165	0.0856583	3.98852	6.64877e-05
chr9	113930135-113930136	0.240814	0.588977	-0.348163	0.0898863	-3.87337	0.000107341
chr9	112481718-112481719	0.873567	0.551877	0.32169	0.0864801	3.71981	0.000199373
chr9	111956348-111956349	0.629524	0.30337	0.326155	0.0938311	3.47597	0.000509
chr9	19086825-19086826	0.637777	0.320702	0.317076	0.090925	3.48722	0.000488062
chr9	113930142-113930143	0.274059	0.602261	-0.328202	0.098319	-3.33813	0.000843447
chr9	53596343-53596344	0.654099	0.307495	0.346605	0.110277	3.14303	0.00167211
chr9	33019865-33019866	0.844039	0.565675	0.278365	0.0797448	3.4907	0.000481764
chr9	29051951-29051952	0.869885	0.58605	0.283835	0.0830412	3.41801	0.000630818
chr9	14718323-14718324	0.575468	0.869556	-0.294088	0.0888251	-3.31087	0.000930073
chr9	119164821-119164822	0.271534	0.0134946	0.258039	0.0725088	3.55873	0.000372658
chr9	66068092-66068093	0.91934	0.63355	0.285789	0.0854248	3.34551	0.000821328
chr9	19978986-19978987	0.695195	0.399032	0.296163	0.0912239	3.24655	0.00116815
chr9	76352371-76352372	0.969796	0.724034	0.245762	0.0680248	3.61283	0.000302872
chr9	100065019-100065020	0.996938	0.757603	0.239335	0.0650659	3.67834	0.000234753
chr9	114716734-114716735	0.535024	0.222214	0.31281	0.0995793	3.14132	0.0016819
chr9	25449205-25449206	0.946719	0.698339	0.24838	0.0703852	3.52887	0.000417335
chr9	112178695-112178696	0.647317	0.354345	0.292972	0.0917818	3.19205	0.00141266
chr9	103383125-103383126	0.886787	0.603998	0.282789	0.0879452	3.21551	0.00130211
chr9	47070620-47070621	0.737919	0.428032	0.309887	0.103684	2.98877	0.00280101
chr9	58112140-58112141	0.407817	0.122003	0.285814	0.0918855	3.11054	0.00186744
chr9	52014504-52014505	0.533929	0.251066	0.282863	0.0904895	3.12592	0.00177247
chr9	120734522-120734523	0.784394	0.498443	0.285951	0.0920811	3.10542	0.00190007
chr9	41345372-41345373	0.917957	0.650806	0.267151	0.0834099	3.20287	0.00136067
chr9	53003283-53003284	0.899337	0.64491	0.254426	0.0784948	3.24132	0.00118979
chr9	103674599-103674600	0.951276	0.719313	0.231963	0.0673845	3.44239	0.000576608
chr9	18678526-18678527	0.559148	0.284699	0.274449	0.0893268	3.07242	0.00212331
chr9	62044243-62044244	0.554976	0.836274	-0.281299	0.0934814	-3.00914	0.00261987
chr9	47520672-47520673	0.887672	0.625097	0.262575	0.0845257	3.10645	0.00189346
chr9	93456445-93456446	0.790041	0.520487	0.269554	0.0882183	3.05554	0.00224659
chr9	93543394-93543395	0.673597	0.390786	0.282811	0.0952913	2.96785	0.00299888
chr9	99843825-99843826	0.713173	0.43718	0.275994	0.0918241	3.00568	0.00264989
chr9	43042620-43042621	0.699056	0.936759	-0.237703	0.0725104	-3.2782	0.00104473
chr9	102399548-102399549	0.877483	0.611618	0.265865	0.0879124	3.0242	0.00249289
chr9	119934545-119934546	0.601648	0.31771	0.283938	0.097597	2.9093	0.00362244
chr9	96069943-96069944	0.773148	0.478379	0.294769	0.10341	2.8505	0.0043651
chr9	74925772-74925773	0.870902	0.612053	0.258849	0.0846707	3.05712	0.00223472
chr9	7804387-7804388	0.630463	0.880482	-0.250019	0.0810087	-3.08633	0.00202646
chr9	99579296-99579297	0.893684	0.647	0.246684	0.0793595	3.10843	0.00188084
chr9	44114125-44114126	0.983933	0.768624	0.215309	0.062466	3.44681	0.000567243
chr9	91653878-91653879	0.867614	0.593343	0.274271	0.0945048	2.90219	0.00370566
chr9	49735452-49735453	0.810659	0.553112	0.257547	0.0865074	2.97717	0.00290925
chr9	63397953-63397954	0.853406	0.596625	0.256781	0.0861961	2.97903	0.00289158
chr9	96491913-96491914	0.382083	0.11977	0.262313	0.0896092	2.9273	0.00341915
chr9	42706931-42706932	0.959895	0.727101	0.232794	0.0733997	3.17159	0.00151605
chr9	122732955-122732956	0.35502	0.636801	-0.281781	0.100559	-2.80213	0.00507656
chr9	109639151-109639152	0.929989	0.692457	0.237531	0.0761842	3.11786	0.00182172
chr9	97356173-97356174	0.625366	0.361688	0.263678	0.0915342	2.88066	0.00396848
chr9	107641449-107641450	0.983639	0.773646	0.209993	0.0615679	3.41076	0.000647827
chr9	52512050-52512051	0.842619	0.599263	0.243356	0.0808404	3.01033	0.00260966
chr9	53040019-53040020	0.850525	0.612438	0.238087	0.0779341	3.05497	0.00225081
chr9	55327492-55327493	0.257656	0.0334543	0.224202	0.0701139	3.19769	0.00138535
chr9	40571714-40571715	0.931763	0.709714	0.222049	0.0689911	3.21852	0.00128856
chr9	116594095-116594096	0.797623	0.555634	0.241988	0.0803251	3.01261	0.00259009
chr9	98943846-98943847	0.939931	0.696608	0.243323	0.0817599	2.97607	0.00291973
chr9	31298307-31298308	0.438723	0.178897	0.259827	0.0915586	2.83782	0.00454227
chr9	73190895-73190896	0.93814	0.69108	0.247061	0.0842693	2.9318	0.00337005
chr9	52296059-52296060	0.869998	0.63326	0.236738	0.0785236	3.01486	0.00257097
chr9	28544262-28544263	0.795995	0.539773	0.256222	0.0897697	2.85421	0.00431434
chr9	122733067-122733068	0.427139	0.697667	-0.270529	0.0980241	-2.75982	0.00578339
chr9	115548793-115548794	0.979747	0.754232	0.225515	0.072982	3.09001	0.0020015
chr9	30278695-30278696	0.941119	0.714604	0.226515	0.0740227	3.06008	0.00221279
chr9	114550807-114550808	0.936579	0.717835	0.218744	0.0695056	3.14714	0.00164875
chr9	57936749-57936750	0.800809	0.547195	0.253614	0.0899677	2.81894	0.0048182
chr9	78815720-78815721	0.894866	0.656135	0.238731	0.0812398	2.9386	0.00329703
chr9	54514067-54514068	0.658188	0.38856	0.269627	0.0994128	2.7122	0.00668385
chr9	74917476-74917477	0.633968	0.36734	0.266628	0.0978475	2.72494	0.00643139
chr9	70138107-70138108	0.394557	0.140128	0.254429	0.0906812	2.80576	0.00501985
chr9	93274138-93274139	0.600204	0.339197	0.261007	0.0945596	2.76023	0.00577601
chr9	108078051-108078052	0.533555	0.260348	0.273207	0.101808	2.68356	0.00728432
chr9	88006530-88006531	0.61085	0.330533	0.280316	0.106101	2.64197	0.00824256
chr9	6125820-6125821	0.658262	0.409022	0.249239	0.0877825	2.83928	0.00452152
chr9	69156460-69156461	0.643307	0.36274	0.280567	0.106557	2.63302	0.00846294
chr9	46426673-46426674	0.897694	0.662606	0.235088	0.0798242	2.94507	0.00322883
chr9	84448294-84448295	0.886784	0.66152	0.225264	0.0741882	3.03638	0.00239434
chr9	85916548-85916549	0.830612	0.587054	0.243558	0.0853613	2.85325	0.0043274
chr9	29723769-29723770	0.842201	0.589914	0.252287	0.0906934	2.78176	0.00540651
chr9	117087912-117087913	0.567144	0.820814	-0.25367	0.0917883	-2.76364	0.00571603
chr9	105212093-105212094	0.34988	0.107347	0.242533	0.0851298	2.84898	0.00438603
chr9	112387131-112387132	0.528658	0.271162	0.257496	0.0940922	2.73664	0.00620704
chr9	44454082-44454083	0.746263	0.96447	-0.218207	0.07063	-3.08943	0.00200538
chr9	6819434-6819435	0.804403	0.568815	0.235588	0.0810376	2.90715	0.00364743
chr9	22358501-22358502	0.772403	0.983043	-0.210639	0.0663529	-3.17453	0.00150078
chr9	103597853-103597854	0.477019	0.227165	0.249854	0.0900315	2.77518	0.00551704
chr9	95509998-95509999	0.859181	0.616822	0.242359	0.0856228	2.83054	0.00464691
chr9	93618866-93618867	0.881572	0.647349	0.234223	0.0812116	2.8841	0.00392531
chr9	17138671-17138672	0.932478	0.713741	0.218736	0.0719395	3.04056	0.00236137
chr9	86922657-86922658	0.971392	0.759179	0.212213	0.0681352	3.11459	0.001842
chr10	123645966-123645967	0.707655	0.131682	0.575973	0.0997009	5.77701	7.60392e-09
chr10	125968471-125968472	0.688088	0.277323	0.410765	0.0868739	4.72829	2.26421e-06
chr10	87856567-87856568	0.813577	0.394633	0.418945	0.0906706	4.62051	3.82794e-06
chr10	95038418-95038419	0.838515	0.524628	0.313887	0.0839274	3.73998	0.000184032
chr10	127903708-127903709	0.590981	0.896834	-0.305853	0.0837914	-3.65017	0.00026207
chr10	72086335-72086336	0.766231	0.442705	0.323526	0.0913528	3.5415	0.000397865
chr10	63122545-63122546	0.858394	0.534692	0.323702	0.0914706	3.53886	0.000401855
chr10	125968461-125968462	0.593807	0.27408	0.319727	0.0912219	3.50493	0.00045672
chr10	126458778-126458779	0.824293	0.464839	0.359455	0.108976	3.29848	0.000972089
chr10	34127866-34127867	0.240532	0.566735	-0.326202	0.0953117	-3.42248	0.000620527
chr10	76261026-76261027	0.759802	0.445473	0.314329	0.0916857	3.42833	0.000607301
chr10	128379471-128379472	0.99707	0.720264	0.276806	0.0761814	3.6335	0.000279597
chr10	60407480-60407481	0.958345	0.686298	0.272047	0.0748424	3.63493	0.000278055
chr10	31302291-31302292	0.809629	0.492101	0.317528	0.0966403	3.28567	0.00101742
chr10	41015740-41015741	0.745385	0.428745	0.316641	0.0965833	3.27842	0.0010439
chr10	63330534-63330535	0.909077	0.629754	0.279323	0.0802323	3.48142	0.000498755
chr10	83615530-83615531	0.959146	0.686553	0.272593	0.0773644	3.52349	0.000425898
chr10	23671704-23671705	0.462264	0.169568	0.292696	0.0879383	3.32843	0.000873375
chr10	123681344-123681345	0.673401	0.250688	0.422714	0.148464	2.84725	0.00440986
chr10	128006243-128006244	0.613776	0.885829	-0.272053	0.079255	-3.43263	0.000597756
chr10	101373170-101373171	0.762401	0.475815	0.286586	0.086963	3.29549	0.00098251
chr10	22610567-22610568	0.880975	0.61069	0.270285	0.079465	3.40131	0.000670625
chr10	127903719-127903720	0.452767	0.7591	-0.306333	0.0965022	-3.17436	0.00150166
chr10	111936202-111936203	0.533057	0.233071	0.299986	0.0936339	3.20381	0.0013562
chr10	63946193-63946194	0.797206	0.496568	0.300638	0.0942271	3.19056	0.00141996
chr10	62792750-62792751	0.0251848	0.265043	-0.239858	0.0662014	-3.62316	0.000291025
chr10	124635188-124635189	0.546574	0.832071	-0.285497	0.0888242	-3.21419	0.00130815
chr10	88504768-88504769	0.753253	0.467663	0.28559	0.0890399	3.20744	0.00133921
chr10	11080004-11080005	0.951092	0.703051	0.248041	0.0710301	3.49206	0.000479308
chr10	31552983-31552984	0.497912	0.215189	0.282723	0.0879744	3.2137	0.00131037
chr10	109563292-109563293	0.824494	0.552032	0.272462	0.0837233	3.25432	0.00113664
chr10	14860688-14860689	0.937573	0.693086	0.244487	0.0702694	3.47927	0.000502774
chr10	67100587-67100588	0.370392	0.099314	0.271078	0.0844344	3.21052	0.00132495
chr10	67312388-67312389	0.617976	0.330002	0.287974	0.0934688	3.08096	0.00206333
chr10	69288328-69288329	0.334866	0.073126	0.26174	0.0816511	3.20559	0.00134784
chr10	88511495-88511496	0.782575	0.488041	0.294534	0.100246	2.93811	0.00330215
chr10	12284108-12284109	0.709689	0.433405	0.276284	0.0909684	3.03714	0.00238834
chr10	72654285-72654286	0.424958	0.727874	-0.302916	0.105793	-2.86328	0.00419281
chr10	80087812-80087813	0.864533	0.602364	0.262168	0.0845313	3.10143	0.00192586
chr10	110356481-110356482	0.887123	0.639618	0.247505	0.0781972	3.16514	0.00155008
chr10	69288346-69288347	0.30364	0.0593432	0.244297	0.0765402	3.19175	0.00141414
chr10	11529758-11529759	0.897266	0.634004	0.263261	0.0866086	3.03967	0.00236839
chr10	61938529-61938530	0.712351	0.41707	0.295281	0.104026	2.83853	0.00453225
chr10	62995237-62995238	0.443386	0.759922	-0.316536	0.115497	-2.74064	0.00613203
chr10	63280479-63280480	0.714896	0.441953	0.272943	0.0922163	2.95981	0.00307826
chr10	46025699-46025700	0.839569	0.576642	0.262926	0.0873737	3.00922	0.00261921
chr10	124315831-124315832	0.685698	0.392263	0.293435	0.104026	2.82078	0.00479072
chr10	79768134-79768135	0.343934	0.0867377	0.257197	0.0850711	3.02331	0.00250023
chr10	40299420-40299421	0.721637	0.438384	0.283253	0.0995935	2.84409	0.00445388
chr10	18847119-18847120	0.594842	0.317238	0.277604	0.0968276	2.86699	0.00414395
chr10	22879460-22879461	0.846879	0.599046	0.247833	0.0806415	3.07327	0.00211727
chr10	104007407-104007408	0.741345	0.47977	0.261575	0.0883304	2.96132	0.00306319
chr10	101551655-101551656	0.804157	0.541806	0.262351	0.0892126	2.94074	0.00327429
chr10	107124690-107124691	0.756561	0.498704	0.257857	0.0867555	2.97222	0.00295651
chr10	125693281-125693282	0.783957	0.512467	0.27149	0.0945933	2.87007	0.00410377
chr10	23601588-23601589	0.74873	0.48193	0.2668	0.0922989	2.8906	0.00384503
chr10	17222025-17222026	0.753372	0.485246	0.268126	0.0936464	2.86317	0.00419422
chr10	125968329-125968330	0.678275	0.4041	0.274174	0.0971348	2.82262	0.00476333
chr10	130037453-130037454	0.943182	0.723336	0.219847	0.0668784	3.28726	0.00101169
chr10	61418750-61418751	0.420731	0.148034	0.272697	0.096701	2.82	0.0048023
chr10	124326001-124326002	0.789903	0.535836	0.254067	0.0863025	2.94392	0.00324088
chr10	67329577-67329578	0.852978	0.590385	0.262593	0.0911203	2.88183	0.00395375
chr10	116925540-116925541	0.469037	0.736908	-0.26787	0.0941425	-2.84537	0.00443596
chr10	117149607-117149608	0.540352	0.278223	0.262129	0.0916531	2.86001	0.00423628
chr10	10410801-10410802	0.853831	0.61454	0.239291	0.0787963	3.03683	0.00239078
chr10	100877971-100877972	0.842864	0.605266	0.237598	0.0780449	3.04437	0.00233167
chr10	23713455-23713456	0.59394	0.330187	0.263752	0.0936474	2.81644	0.00485588
chr10	105371041-105371042	0.958467	0.745197	0.21327	0.0648335	3.28951	0.00100363
chr10	53515186-53515187	0.614233	0.88	-0.265767	0.0952573	-2.78999	0.00527094
chr10	88452838-88452839	0.979833	0.763299	0.216534	0.0671919	3.22263	0.00127021
chr10	62699375-62699376	0.825939	0.568978	0.25696	0.0907329	2.83205	0.00462502
chr10	101968392-101968393	0.931925	0.710664	0.221261	0.070355	3.14492	0.00166133
chr10	87855162-87855163	0.886471	0.623251	0.26322	0.0948741	2.77441	0.00553012
chr10	8835837-8835838	0.963801	0.740051	0.22375	0.0725742	3.08304	0.00204895
chr10	24078775-24078776	0.540382	0.290116	0.250265	0.0882203	2.83682	0.00455646
chr10	116104861-116104862	0.567385	0.303074	0.264311	0.0965611	2.73724	0.00619574
chr10	127550528-127550529	0.676759	0.920113	-0.243354	0.0842736	-2.88766	0.00388117
chr10	121017461-121017462	0.758885	0.5064	0.252486	0.0896784	2.81546	0.00487081
chr10	97584268-97584269	0.568975	0.314628	0.254347	0.0908276	2.80033	0.00510506
chr10	127514110-127514111	0.476136	0.20477	0.271367	0.101068	2.68499	0.00725329
chr10	22665843-22665844	0.91287	0.688879	0.223991	0.0732713	3.05701	0.00223556
chr10	62183525-62183526	0.679154	0.924285	-0.245132	0.0862562	-2.84191	0.00448448
chr10	111021487-111021488	0.562552	0.304026	0.258526	0.0946652	2.73095	0.00631522
chr10	77113240-77113241	0.337497	0.0869821	0.250515	0.0901784	2.77799	0.00546965
chr10	127209054-127209055	0.984366	0.764951	0.219415	0.0717859	3.05651	0.00223929
chr10	81203414-81203415	0.624118	0.350598	0.27352	0.104498	2.61745	0.00885884
chr10	42872632-42872633	0.975284	0.767169	0.208114	0.065097	3.19699	0.00138871
chr10	114600684-114600685	0.651057	0.385401	0.265656	0.100339	2.64757	0.00810717
chr10	58613547-58613548	0.985759	0.786706	0.199053	0.0600007	3.31752	0.000908218
chr11	87404940-87404941	0.363505	0.919621	-0.556116	0.0865678	-6.42405	1.32693e-10
chr11	87404957-87404958	0.419057	0.897878	-0.478821	0.0888668	-5.38807	7.12174e-08
chr11	49267310-49267311	0.356937	0.743235	-0.386298	0.101685	-3.79898	0.000145291
chr11	101279526-101279527	0.498103	0.842212	-0.344109	0.0958496	-3.5901	0.000330553
chr11	93536466-93536467	0.919773	0.612173	0.3076	0.0842506	3.65101	0.000261209
chr11	61062954-61062955	0.922097	0.601335	0.320763	0.0898212	3.57112	0.000355457
chr11	111073559-111073560	0.555341	0.861197	-0.305855	0.0838961	-3.64564	0.000266723
chr11	49267311-49267312	0.379625	0.729475	-0.34985	0.102499	-3.41322	0.000642011
chr11	31869957-31869958	0.489798	0.80801	-0.318212	0.0914692	-3.4789	0.000503472
chr11	49267309-49267310	0.369162	0.715434	-0.346273	0.104013	-3.32913	0.00087117
chr11	101279581-101279582	0.525495	0.839121	-0.313626	0.0903455	-3.4714	0.00051775
chr11	114120791-114120792	0.971421	0.688512	0.282909	0.0795906	3.55455	0.000378622
chr11	60478000-60478001	0.682272	0.96419	-0.281917	0.0824861	-3.41776	0.000631399
chr11	45943423-45943424	0.528408	0.219729	0.308679	0.0959711	3.21637	0.00129822
chr11	87504773-87504774	0.465722	0.176148	0.289574	0.087275	3.31794	0.000906827
chr11	90472118-90472119	0.937244	0.646071	0.291173	0.0895602	3.25115	0.0011494
chr11	87820345-87820346	0.792012	0.480063	0.311949	0.0993643	3.13944	0.0016927
chr11	116023429-116023430	0.0133604	0.23452	-0.221159	0.0582503	-3.79671	0.000146631
chr11	116023423-116023424	0.0133281	0.234856	-0.221528	0.0584718	-3.78863	0.000151477
chr11	69127518-69127519	0.8525	0.566189	0.286311	0.0897235	3.19104	0.00141762
chr11	103114780-103114781	0.588659	0.872648	-0.283989	0.0905163	-3.13743	0.00170435
chr11	95936469-95936470	0.883266	0.570031	0.313235	0.105036	2.98215	0.00286228
chr11	116023432-116023433	0.0132324	0.227643	-0.214411	0.0572757	-3.74349	0.000181484
chr11	6472681-6472682	0.363219	0.108651	0.254567	0.0777963	3.27223	0.00106703
chr11	87405135-87405136	0.65854	0.927259	-0.268719	0.0851156	-3.15711	0.00159343
chr11	97661206-97661207	0.775603	0.494919	0.280684	0.0911878	3.07808	0.00208337
chr11	70333708-70333709	0.186665	0.469226	-0.282561	0.0921686	-3.0657	0.00217164
chr11	78846768-78846769	0.388093	0.120632	0.267461	0.085709	3.12058	0.00180498
chr11	101263551-101263552	0.791912	0.49354	0.298371	0.102651	2.90665	0.00365324
chr11	67299816-67299817	0.913904	0.666373	0.247531	0.0771186	3.20974	0.00132855
chr11	41086768-41086769	0.591407	0.306213	0.285194	0.0970699	2.93803	0.00330307
chr11	70541068-70541069	0.374979	0.105299	0.26968	0.0891782	3.02405	0.00249414
chr11	95257247-95257248	0.996276	0.782589	0.213687	0.0599471	3.5646	0.000364416
chr11	35982217-35982218	0.969857	0.736384	0.233473	0.071073	3.28497	0.00101993
chr11	79759934-79759935	0.398591	0.125581	0.27301	0.0922476	2.95954	0.00308099
chr11	63483887-63483888	0.943542	0.659821	0.283721	0.0980559	2.89346	0.00381019
chr11	53304708-53304709	0.597214	0.31977	0.277444	0.0949753	2.92122	0.00348663
chr11	28213140-28213141	0.436699	0.160264	0.276435	0.0944791	2.92589	0.00343476
chr11	58594931-58594932	0.838008	0.580181	0.257827	0.0845315	3.05007	0.00228789
chr11	103613645-103613646	0.807066	0.547763	0.259303	0.0853259	3.03897	0.0023739
chr11	87405058-87405059	0.496872	0.795303	-0.298431	0.106636	-2.79859	0.0051327
chr11	81420799-81420800	0.942601	0.693265	0.249337	0.0802075	3.10865	0.00187947
chr11	81869839-81869840	0.91012	0.6616	0.248519	0.0797825	3.11496	0.00183969
chr11	60501743-60501744	0.591684	0.859557	-0.267874	0.0902035	-2.96966	0.00298133
chr11	83345904-83345905	0.656724	0.963261	-0.306537	0.111418	-2.75124	0.00593695
chr11	82565729-82565730	0.928178	0.676357	0.25182	0.0819962	3.07112	0.00213255
chr11	70729501-70729502	0.735605	0.968089	-0.232484	0.0717351	-3.24086	0.00119168
chr11	69074510-69074511	0.645369	0.361678	0.28369	0.0998228	2.84194	0.00448401
chr11	8325681-8325682	0.994774	0.745864	0.248909	0.0810416	3.07138	0.00213072
chr11	102311707-102311708	0.506457	0.787956	-0.281499	0.0989798	-2.84401	0.004455
chr11	87507920-87507921	0.819804	0.542343	0.277461	0.0968501	2.86485	0.00417205
chr11	93536465-93536466	0.910617	0.665918	0.244699	0.0790378	3.09598	0.00196166
chr11	103961372-103961373	0.153496	0.415874	-0.262378	0.0889667	-2.94917	0.00318631
chr11	89825788-89825789	0.905151	0.662331	0.24282	0.0783623	3.09868	0.00194382
chr11	95350487-95350488	0.320596	0.0661201	0.254476	0.0848122	3.00046	0.00269573
chr11	92290596-92290597	0.659103	0.371492	0.287611	0.103109	2.7894	0.00528062
chr11	82492596-82492597	0.655235	0.383203	0.272032	0.0949629	2.86461	0.00417519
chr11	62756686-62756687	0.581921	0.304696	0.277225	0.0983853	2.81775	0.00483621
chr11	63979773-63979774	0.623389	0.876899	-0.25351	0.0861201	-2.94368	0.00324334
chr11	59758888-59758889	0.836793	0.568984	0.267808	0.0947772	2.82566	0.00471832
chr11	110605286-110605287	0.742597	0.471857	0.270741	0.0964674	2.80655	0.00500749
chr11	82965020-82965021	0.669971	0.407044	0.262927	0.0923859	2.84596	0.00442778
chr11	44516331-44516332	0.930931	0.687449	0.243482	0.0814345	2.98991	0.00279061
chr11	50695548-50695549	0.797281	0.545477	0.251804	0.086477	2.9118	0.00359355
chr11	112501897-112501898	0.796633	0.512452	0.284181	0.105041	2.70543	0.00682169
chr11	99369938-99369939	0.942844	0.693924	0.24892	0.0850816	2.92566	0.00343723
chr11	120582305-120582306	0.225816	0.489535	-0.26372	0.0940994	-2.80256	0.00506981
chr11	70953464-70953465	0.996412	0.780462	0.21595	0.0666387	3.24062	0.00119272
chr11	46595147-46595148	0.860711	0.610399	0.250312	0.0864061	2.89692	0.0037684
chr11	94529737-94529738	0.628932	0.877883	-0.248951	0.0858749	-2.89899	0.00374365
chr11	88965213-88965214	0.58641	0.949712	-0.363302	0.153037	-2.37395	0.017599
chr11	101443525-101443526	0.918511	0.683077	0.235434	0.0782557	3.00852	0.00262521
chr11	33932502-33932503	0.511805	0.240332	0.271473	0.0991403	2.73827	0.0061764
chr11	92278109-92278110	0.643813	0.369866	0.273947	0.100863	2.71604	0.00660687
chr11	68798139-68798140	0.647602	0.897741	-0.250139	0.0870445	-2.87369	0.00405707
chr11	10094311-10094312	0.857565	0.594794	0.262771	0.0944609	2.7818	0.00540585
chr11	31808199-31808200	0.601483	0.321247	0.280236	0.104901	2.67143	0.00755292
chr11	71483033-71483034	0.373303	0.114037	0.259267	0.0928008	2.7938	0.0052093
chr11	57550201-57550202	0.964259	0.748492	0.215767	0.0677758	3.18354	0.00145486
chr11	44370136-44370137	0.891419	0.64352	0.247899	0.0866045	2.86242	0.00420417
chr11	106012009-106012010	0.887491	0.63508	0.252411	0.0897405	2.81268	0.00491312
chr11	69046577-69046578	0.473096	0.211588	0.261508	0.0955581	2.73664	0.00620703
chr11	21428867-21428868	0.730107	0.461115	0.268992	0.100313	2.68154	0.00732846
chr11	77459853-77459854	0.858069	0.613577	0.244492	0.0857333	2.85177	0.0043476
chr11	29306264-29306265	0.588856	0.827947	-0.23909	0.0825603	-2.89595	0.00378015
chr11	88873676-88873677	0.346142	0.0916328	0.254509	0.0918343	2.7714	0.00558166
chr11	84076560-84076561	0.370151	0.12429	0.245861	0.0867531	2.83403	0.00459644
chr11	103764105-103764106	0.410527	0.16142	0.249107	0.0888262	2.80443	0.00504052
chr11	80963687-80963688	0.904104	0.677632	0.226473	0.0753418	3.00594	0.00264762
chr11	40657793-40657794	0.645053	0.88916	-0.244107	0.0861244	-2.83436	0.00459181
chr11	117000011-117000012	0.553633	0.271608	0.282024	0.109224	2.58206	0.00982123
chr11	46706433-46706434	0.396303	0.147042	0.249261	0.0895985	2.78198	0.00540289
chr11	82019791-82019792	0.537832	0.791519	-0.253688	0.092693	-2.73686	0.00620292
chr11	100974872-100974873	0.752913	0.483445	0.269468	0.102357	2.63263	0.00847262
chr11	81527282-81527283	0.791181	0.533398	0.257783	0.0952847	2.7054	0.00682225
chr11	106668797-106668798	0.105013	0.343204	-0.238191	0.0835133	-2.85213	0.00434271
chr11	103476055-103476056	0.890342	0.660259	0.230083	0.078811	2.91942	0.00350678
chr11	114233760-114233761	0.669409	0.908269	-0.238859	0.0841851	-2.83731	0.00454952
chr11	48137126-48137127	0.867464	0.625949	0.241515	0.0859791	2.80899	0.00496967
chr12	57752599-57752600	0.400836	0.939439	-0.538603	0.0871085	-6.18312	6.28455e-10
chr12	116404999-116405000	0.0970124	0.530641	-0.433628	0.0898808	-4.82448	1.40366e-06
chr12	56880839-56880840	0.469563	0.861178	-0.391615	0.0807688	-4.84859	1.2434e-06
chr12	117169888-117169889	0.732826	0.344071	0.388754	0.0996009	3.90312	9.49606e-05
chr12	89670098-89670099	0.370757	0.749341	-0.378585	0.0989996	-3.8241	0.000131249
chr12	105554576-105554577	0.678551	0.262226	0.416325	0.115935	3.59102	0.000329387
chr12	111276662-111276663	0.506738	0.158049	0.348689	0.09871	3.53246	0.000411711
chr12	17090376-17090377	0.941854	0.64615	0.295704	0.0815719	3.62507	0.000288881
chr12	89672042-89672043	0.372632	0.702388	-0.329755	0.0982811	-3.35523	0.000793002
chr12	90909726-90909727	0.442211	0.761596	-0.319385	0.0974211	-3.2784	0.00104398
chr12	116404725-116404726	0.374523	0.723748	-0.349225	0.111308	-3.13747	0.00170413
chr12	98872931-98872932	0.793669	0.497561	0.296108	0.0883102	3.35304	0.000799288
chr12	61903730-61903731	0.837926	0.515904	0.322022	0.101625	3.16873	0.00153107
chr12	29311563-29311564	0.959786	0.706251	0.253536	0.0707574	3.58316	0.000339457
chr12	4769596-4769597	0.30722	0.610051	-0.302831	0.0936322	-3.23426	0.00121959
chr12	99655265-99655266	0.489983	0.791342	-0.301359	0.0937464	-3.21462	0.00130619
chr12	117150668-117150669	0.748291	0.440954	0.307337	0.0972324	3.16085	0.0015731
chr12	90874152-90874153	0.544533	0.850152	-0.30562	0.0973511	-3.13936	0.0016932
chr12	70071406-70071407	0.296852	0.0101668	0.286685	0.0884535	3.24108	0.00119078
chr12	24612826-24612827	0.731803	0.972319	-0.240516	0.0666233	-3.61009	0.000306095
chr12	82170841-82170842	0.49957	0.204422	0.295148	0.0940452	3.13836	0.00169895
chr12	105521205-105521206	0.890103	0.619205	0.270898	0.084254	3.21526	0.00130329
chr12	63019180-63019181	0.585248	0.847469	-0.262222	0.0806005	-3.25335	0.00114052
chr12	111145557-111145558	0.758922	0.997211	-0.238288	0.0688222	-3.46238	0.000535425
chr12	28622123-28622124	0.484879	0.180246	0.304633	0.101902	2.98948	0.00279453
chr12	90183402-90183403	0.608581	0.326427	0.282155	0.0907989	3.10747	0.00188696
chr12	74222772-74222773	0.904882	0.641983	0.262899	0.0820986	3.20224	0.00136365
chr12	75817536-75817537	0.613436	0.323727	0.289709	0.0956612	3.02849	0.00245782
chr12	66406848-66406849	0.820966	0.541435	0.279531	0.0905513	3.08699	0.00202196
chr12	59835046-59835047	0.482705	0.769405	-0.286701	0.0947966	-3.02438	0.00249147
chr12	108954176-108954177	0.980164	0.743742	0.236422	0.070069	3.37413	0.000740483
chr12	117077891-117077892	0.687905	0.40117	0.286736	0.0961941	2.9808	0.00287494
chr12	91728599-91728600	0.701489	0.970134	-0.268645	0.0871989	-3.08084	0.00206421
chr12	17832998-17832999	0.961716	0.732754	0.228962	0.0679641	3.36887	0.000754779
chr12	17251218-17251219	0.621813	0.332567	0.289245	0.100548	2.87669	0.00401871
chr12	45996833-45996834	0.92619	0.673785	0.252406	0.0809528	3.11793	0.00182124
chr12	119059463-119059464	0.713757	0.432039	0.281718	0.0968077	2.91008	0.00361338
chr12	33968300-33968301	0.27138	0.0298618	0.241518	0.0755434	3.19708	0.00138828
chr12	30857857-30857858	0.959836	0.73031	0.229527	0.0695788	3.2988	0.000970987
chr12	29541125-29541126	0.780063	0.470992	0.30907	0.113402	2.72544	0.00642159
chr12	104495170-104495171	0.768423	0.49258	0.275844	0.0957924	2.8796	0.00398183
chr12	107201513-107201514	0.629774	0.890866	-0.261092	0.0881276	-2.96266	0.00304994
chr12	107937644-107937645	0.935479	0.701353	0.234126	0.0735319	3.184	0.00145253
chr12	56640690-56640691	0.392082	0.6767	-0.284618	0.101322	-2.80903	0.00496912
chr12	32719395-32719396	0.930872	0.660858	0.270014	0.0934167	2.89043	0.00384715
chr12	77553743-77553744	0.545202	0.83497	-0.289768	0.104539	-2.77185	0.00557384
chr12	91643934-91643935	0.689592	0.965911	-0.276319	0.0971511	-2.84422	0.00445203
chr12	74180453-74180454	0.823311	0.563894	0.259417	0.0880211	2.94721	0.00320652
chr12	114204433-114204434	0.331957	0.0838315	0.248126	0.0822631	3.01625	0.00255924
chr12	91575798-91575799	0.637765	0.941486	-0.303721	0.113662	-2.67213	0.00753707
chr12	56661345-56661346	0.798543	0.526298	0.272245	0.096155	2.83131	0.00463578
chr12	30453743-30453744	0.705893	0.935943	-0.23005	0.0726284	-3.1675	0.00153757
chr12	98703236-98703237	0.945386	0.692704	0.252681	0.0854478	2.95714	0.00310508
chr12	65297478-65297479	0.667224	0.401552	0.265672	0.0928328	2.86183	0.00421206
chr12	73034097-73034098	0.685033	0.421762	0.263271	0.0914978	2.87735	0.00401031
chr12	81217010-81217011	0.831643	0.578427	0.253216	0.0858566	2.94929	0.00318507
chr12	62946039-62946040	0.896365	0.655167	0.241198	0.0791889	3.04586	0.00232016
chr12	70491034-70491035	0.674153	0.928411	-0.254258	0.0865708	-2.937	0.00331405
chr12	31947741-31947742	0.724962	0.467162	0.2578	0.0888217	2.90244	0.00370269
chr12	56231621-56231622	0.852573	0.595692	0.256881	0.0885465	2.90109	0.0037187
chr12	84647713-84647714	0.694805	0.423896	0.270909	0.0965342	2.80635	0.00501059
chr12	59451259-59451260	0.647876	0.883804	-0.235929	0.0770433	-3.06229	0.00219651
chr12	26507151-26507152	0.438853	0.70838	-0.269527	0.0961656	-2.80274	0.00506711
chr12	7854377-7854378	0.849646	0.60631	0.243336	0.0815188	2.98502	0.00283557
chr12	73505127-73505128	0.898092	0.65654	0.241551	0.0808656	2.98707	0.00281662
chr12	86619321-86619322	0.981192	0.759152	0.22204	0.0698598	3.17837	0.00148108
chr12	55446911-55446912	0.102256	0.35137	-0.249114	0.0855962	-2.91034	0.00361037
chr12	72198472-72198473	0.499361	0.782118	-0.282756	0.105061	-2.69135	0.0071163
chr12	112586233-112586234	0.288379	0.0540721	0.234307	0.0772792	3.03196	0.00242975
chr12	3561109-3561110	0.951158	0.706508	0.24465	0.0836125	2.926	0.00343346
chr12	70067811-70067812	0.245413	0.00987095	0.235542	0.0785914	2.99705	0.00272609
chr12	98196335-98196336	0.841341	0.586948	0.254393	0.09011	2.82313	0.00475569
chr12	35830768-35830769	0.949114	0.723238	0.225876	0.0734778	3.07407	0.00211158
chr12	39766648-39766649	0.997689	0.7971	0.200589	0.0588028	3.41122	0.000646721
chr12	89646749-89646750	0.757659	0.492707	0.264952	0.0965394	2.74449	0.00606048
chr12	96435415-96435416	0.54747	0.271538	0.275932	0.103201	2.67374	0.00750112
chr12	104461548-104461549	0.948729	0.714973	0.233756	0.0788674	2.96391	0.00303759
chr12	111444289-111444290	0.14388	0.411143	-0.267263	0.0987054	-2.70768	0.00677546
chr12	110484368-110484369	0.908928	0.658533	0.250394	0.0888873	2.81699	0.00484762
chr12	20312668-20312669	0.118614	0.354037	-0.235423	0.0800642	-2.94042	0.00327765
chr12	42633989-42633990	0.336212	0.613515	-0.277303	0.105148	-2.63727	0.00835754
chr12	86520793-86520794	0.902313	0.662974	0.239339	0.0827146	2.89355	0.00380909
chr12	82108253-82108254	0.785717	0.530164	0.255553	0.0924759	2.76346	0.00571919
chr12	56503717-56503718	0.784044	0.534144	0.249899	0.0891304	2.80375	0.0050512
chr12	114260714-114260715	0.796614	0.550297	0.246317	0.0872395	2.82345	0.00475092
chr12	18748818-18748819	0.84884	0.611194	0.237646	0.0820863	2.89508	0.00379064
chr12	91621765-91621766	0.585991	0.849181	-0.263191	0.0973691	-2.70302	0.00687121
chr12	91685293-91685294	0.563457	0.829655	-0.266198	0.099197	-2.68353	0.00728495
chr12	5258169-5258170	0.828503	0.569491	0.259012	0.0950024	2.72637	0.00640348
chr12	91463318-91463319	0.771719	0.518636	0.253083	0.0916006	2.76289	0.00572918
chr12	108052795-108052796	0.930539	0.694136	0.236403	0.0819181	2.88584	0.00390366
chr12	14518027-14518028	0.761612	0.513895	0.247717	0.0887993	2.78963	0.00527691
chr12	42473246-42473247	0.601586	0.351056	0.25053	0.090539	2.7671	0.00565583
chr12	75853102-75853103	0.241561	0.497325	-0.255764	0.0937066	-2.72941	0.00634469
chr12	112142009-112142010	0.542872	0.798591	-0.25572	0.093692	-2.72937	0.00634562
chr12	93781392-93781393	0.802318	0.566446	0.235872	0.0825299	2.85801	0.00426304
chr13	55209792-55209793	0.459408	0.996991	-0.537582	0.0755526	-7.11534	1.11635e-12
chr13	55209849-55209850	0.40208	0.961706	-0.559626	0.0797266	-7.01931	2.22959e-12
chr13	55210035-55210036	0.403687	0.909541	-0.505854	0.0907349	-5.57507	2.47425e-08
chr13	55209842-55209843	0.541247	0.997092	-0.455845	0.0802574	-5.67979	1.34859e-08
chr13	55209772-55209773	0.478873	0.936092	-0.457219	0.0834993	-5.47572	4.35737e-08
chr13	55210007-55210008	0.450001	0.912504	-0.462502	0.0898481	-5.1476	2.6384e-07
chr13	105534864-105534865	0.624299	0.126274	0.498025	0.100204	4.97013	6.69084e-07
chr13	66217905-66217906	0.820296	0.37544	0.444856	0.0937837	4.74343	2.10131e-06
chr13	55210006-55210007	0.4114	0.854384	-0.442984	0.0964373	-4.59349	4.359e-06
chr13	55210032-55210033	0.485297	0.907647	-0.42235	0.0936599	-4.5094	6.50122e-06
chr13	55209737-55209738	0.586987	0.967896	-0.380909	0.0817478	-4.65956	3.16888e-06
chr13	55210008-55210009	0.473134	0.888248	-0.415114	0.094134	-4.40982	1.03458e-05
chr13	37831933-37831934	0.818052	0.414767	0.403285	0.0933379	4.3207	1.55535e-05
chr13	24548099-24548100	0.565342	0.926389	-0.361047	0.0912782	-3.95546	7.63886e-05
chr13	40434122-40434123	0.874439	0.509832	0.364608	0.0933798	3.90457	9.43937e-05
chr13	50285979-50285980	0.804653	0.4533	0.351353	0.0936702	3.75096	0.000176159
chr13	55209657-55209658	0.558226	0.895227	-0.337001	0.0932776	-3.61288	0.000302811
chr13	86334573-86334574	0.43944	0.829083	-0.389643	0.118207	-3.29628	0.000979738
chr13	105657880-105657881	0.463946	0.10294	0.361006	0.108297	3.33347	0.000857689
chr13	24081437-24081438	0.672962	0.330628	0.342334	0.102729	3.33241	0.000860971
chr13	102644573-102644574	0.810186	0.515569	0.294617	0.0857767	3.4347	0.000593209
chr13	40663779-40663780	0.865878	0.569561	0.296318	0.0874133	3.38985	0.000699313
chr13	22040533-22040534	0.390646	0.114245	0.276401	0.0789147	3.50253	0.000460868
chr13	62860883-62860884	0.633564	0.31122	0.322344	0.100217	3.21646	0.00129784
chr13	100858868-100858869	0.394834	0.713161	-0.318326	0.0998014	-3.1896	0.00142472
chr13	110279184-110279185	0.753358	0.470164	0.283194	0.0841074	3.36705	0.000759781
chr13	102696829-102696830	0.818199	0.538311	0.279888	0.083574	3.34899	0.000811081
chr13	103015517-103015518	0.903964	0.62294	0.281024	0.0843822	3.33037	0.000867298
chr13	99987315-99987316	0.697493	0.967521	-0.270028	0.0795279	-3.39538	0.000685329
chr13	5031142-5031143	0.580873	0.304098	0.276775	0.0828046	3.34251	0.000830247
chr13	102521371-102521372	0.780816	0.483571	0.297245	0.0929833	3.19676	0.00138983
chr13	18448002-18448003	0.724447	0.425711	0.298736	0.09406	3.17601	0.00149315
chr13	59948232-59948233	0.872856	0.590706	0.28215	0.088356	3.19333	0.00140642
chr13	96668273-96668274	0.906059	0.645245	0.260814	0.0784461	3.32476	0.000884961
chr13	100593836-100593837	0.996491	0.753151	0.24334	0.070199	3.46644	0.000527408
chr13	25026992-25026993	0.859703	0.580771	0.278931	0.0880306	3.16857	0.00153189
chr13	58497983-58497984	0.45369	0.750401	-0.296711	0.0969304	-3.06107	0.00220548
chr13	25325433-25325434	0.816773	0.543294	0.273479	0.0860832	3.17692	0.0014885
chr13	71098570-71098571	0.924066	0.651414	0.272652	0.0856802	3.18221	0.00146158
chr13	99146786-99146787	0.839837	0.566129	0.273708	0.0863142	3.17106	0.00151882
chr13	81427247-81427248	0.790901	0.482815	0.308086	0.103578	2.97444	0.00293527
chr13	15874201-15874202	0.783738	0.496083	0.287656	0.0935246	3.07572	0.00209994
chr13	116137271-116137272	0.865264	0.60541	0.259853	0.0804777	3.22889	0.00124273
chr13	107196833-107196834	0.888405	0.632363	0.256042	0.0795565	3.21837	0.00128924
chr13	56166178-56166179	0.705452	0.418673	0.286779	0.0955703	3.00072	0.00269346
chr13	48205058-48205059	0.927171	0.683526	0.243646	0.0739061	3.29669	0.000978308
chr13	22596911-22596912	0.835308	0.574095	0.261212	0.0829894	3.14754	0.0016465
chr13	93083794-93083795	0.855259	0.578715	0.276545	0.0909096	3.04198	0.00235031
chr13	105597487-105597488	0.734732	0.46444	0.270292	0.0881046	3.06785	0.00215603
chr13	116879071-116879072	0.957685	0.719222	0.238462	0.0721347	3.30579	0.000947079
chr13	49276030-49276031	0.964625	0.727605	0.23702	0.0714334	3.31805	0.00090648
chr13	11656618-11656619	0.805281	0.539022	0.266258	0.0866852	3.07156	0.00212947
chr13	94482873-94482874	0.180094	0.480234	-0.30014	0.104904	-2.86108	0.00422197
chr13	34483732-34483733	0.849951	0.59368	0.256272	0.0820349	3.12393	0.00178451
chr13	55427803-55427804	0.552718	0.270707	0.282011	0.0960749	2.93533	0.00333195
chr13	96725417-96725418	0.509964	0.23338	0.276583	0.0936457	2.95351	0.00314186
chr13	38906043-38906044	0.683023	0.941036	-0.258013	0.0842735	-3.06162	0.00220146
chr13	59099095-59099096	0.869724	0.615729	0.253995	0.0821395	3.09224	0.00198649
chr13	71165116-71165117	0.968679	0.727558	0.241121	0.0754993	3.19368	0.00140473
chr13	111803306-111803307	0.426569	0.160226	0.266343	0.0892093	2.9856	0.00283024
chr13	57385709-57385710	0.750783	0.478865	0.271918	0.0922348	2.94811	0.00319728
chr13	42828273-42828274	0.777172	0.515392	0.26178	0.0872897	2.99898	0.00270883
chr13	24175027-24175028	0.487159	0.763832	-0.276674	0.0955783	-2.89473	0.00379482
chr13	30176524-30176525	0.869387	0.613106	0.256281	0.084562	3.03068	0.00244003
chr13	100868462-100868463	0.961443	0.735429	0.226015	0.0688655	3.28197	0.00103083
chr13	17996348-17996349	0.838156	0.564321	0.273835	0.09558	2.86498	0.0041703
chr13	72539941-72539942	0.712034	0.434597	0.277437	0.0979515	2.83239	0.00462017
chr13	105596480-105596481	0.833371	0.585098	0.248273	0.0818853	3.03196	0.00242969
chr13	23575151-23575152	0.559155	0.290385	0.26877	0.0934491	2.87611	0.00402612
chr13	56423414-56423415	0.846648	0.593164	0.253484	0.0850847	2.9792	0.00289001
chr13	33080891-33080892	0.521306	0.257403	0.263903	0.0912175	2.89312	0.00381434
chr13	31184244-31184245	0.489107	0.21016	0.278947	0.10116	2.75748	0.00582487
chr13	49342429-49342430	0.31428	0.595329	-0.281049	0.10244	-2.74355	0.00607788
chr13	41478533-41478534	0.575364	0.840363	-0.265	0.0933956	-2.83739	0.00454842
chr13	106492364-106492365	0.743004	0.466091	0.276913	0.100217	2.76314	0.00572489
chr13	57905217-57905218	0.97017	0.752818	0.217352	0.066491	3.26889	0.00107969
chr13	21395297-21395298	0.764123	0.50621	0.257913	0.089589	2.87884	0.00399136
chr13	113022145-113022146	0.499196	0.228393	0.270803	0.0970512	2.79031	0.00526571
chr13	23708241-23708242	0.883887	0.62749	0.256398	0.088965	2.88201	0.00395148
chr13	50362855-50362856	0.963034	0.732696	0.230339	0.0742376	3.10273	0.00191748
chr13	103590580-103590581	0.621099	0.880155	-0.259055	0.0909132	-2.84948	0.00437906
chr13	70032940-70032941	0.816884	0.563404	0.25348	0.0877297	2.88933	0.00386066
chr13	48351084-48351085	0.699526	0.431902	0.267624	0.0959197	2.79008	0.00526951
chr13	42919096-42919097	0.956757	0.73417	0.222587	0.0701435	3.17331	0.00150714
chr13	112383203-112383204	0.912612	0.673336	0.239276	0.0798316	2.99726	0.00272418
chr13	32974028-32974029	0.929342	0.687849	0.241494	0.0812034	2.97393	0.00294007
chr13	23435833-23435834	0.406636	0.155901	0.250736	0.086954	2.88354	0.00393229
chr13	68886665-68886666	0.873595	0.632551	0.241044	0.0816369	2.95263	0.00315077
chr13	80813192-80813193	0.870013	0.625868	0.244145	0.0836974	2.917	0.00353417
chr13	31657076-31657077	0.44865	0.708772	-0.260122	0.0932356	-2.78994	0.00527171
chr13	55877423-55877424	0.964555	0.755316	0.209239	0.0637874	3.28025	0.00103716
chr13	89328812-89328813	0.585398	0.328301	0.257097	0.0918278	2.79977	0.00511393
chr13	26561497-26561498	0.587341	0.333702	0.253638	0.0898134	2.82406	0.00474198
chr13	22407590-22407591	0.762991	0.511322	0.251669	0.088678	2.83801	0.0045396
chr13	45590450-45590451	0.849465	0.602548	0.246917	0.0859227	2.87371	0.00405687
chr13	113797592-113797593	0.914323	0.694081	0.220243	0.0705319	3.1226	0.00179262
chr13	84623326-84623327	0.871393	0.642005	0.229388	0.075907	3.02196	0.00251146
chr13	103645558-103645559	0.83731	0.595429	0.241881	0.0835173	2.89618	0.00377736
chr13	20093950-20093951	0.691318	0.424358	0.26696	0.0983279	2.71499	0.00662769
chr13	100878502-100878503	0.636257	0.379653	0.256604	0.0922909	2.78038	0.0054295
chr13	48549340-48549341	0.934987	0.713888	0.221099	0.0714177	3.09586	0.00196244
chr13	56229784-56229785	0.586589	0.324199	0.26239	0.0963737	2.72263	0.00647649
chr13	53232305-53232306	0.603257	0.329773	0.273484	0.10337	2.64569	0.00815239
chr13	111020241-111020242	0.781075	0.531114	0.249961	0.0896943	2.78681	0.005323
chr13	64416684-64416685	0.846835	0.590455	0.25638	0.093597	2.73919	0.00615903
chr13	115313246-115313247	0.712612	0.4663	0.246312	0.0876405	2.81048	0.00494669
chr13	69307596-69307597	0.92484	0.697348	0.227492	0.0763759	2.97858	0.00289587
chr13	58210953-58210954	0.669316	0.411723	0.257593	0.0946194	2.72242	0.00648067
chr13	39609470-39609471	0.644582	0.88237	-0.237787	0.0828658	-2.86955	0.00411062
chr13	63412063-63412064	0.642309	0.875109	-0.2328	0.0798855	-2.91417	0.00356637
chr13	53023892-53023893	0.884703	0.640208	0.244495	0.0869458	2.81204	0.00492291
chr13	43305711-43305712	0.852269	0.597007	0.255262	0.0935899	2.72745	0.00638256
chr13	24482237-24482238	0.505452	0.253628	0.251823	0.0921123	2.73387	0.00625947
chr13	53936276-53936277	0.521518	0.270221	0.251297	0.0919545	2.73284	0.00627904
chr14	101920291-101920292	0.142664	0.837869	-0.695205	0.118669	-5.85833	4.67537e-09
chr14	100879523-100879524	0.0628294	0.50766	-0.444831	0.0754086	-5.89894	3.65846e-09
chr14	100840066-100840067	0.082045	0.497435	-0.41539	0.0869302	-4.77843	1.76665e-06
chr14	100704401-100704402	0.0873991	0.491086	-0.403687	0.0852262	-4.73665	2.17282e-06
chr14	103260254-103260255	0.412103	0.969585	-0.557483	0.142158	-3.92156	8.79783e-05
chr14	99697276-99697277	0.0839912	0.432343	-0.348352	0.0814451	-4.27714	1.89314e-05
chr14	100195380-100195381	0.114846	0.481328	-0.366481	0.0928472	-3.94714	7.90894e-05
chr14	100053995-100053996	0.117012	0.502714	-0.385703	0.100946	-3.82089	0.000132971
chr14	100840679-100840680	0.0623216	0.378408	-0.316087	0.0793399	-3.98396	6.77775e-05
chr14	100841376-100841377	0.119409	0.490262	-0.370852	0.0994979	-3.72724	0.000193589
chr14	56885273-56885274	0.377717	0.726691	-0.348975	0.0923723	-3.77791	0.000158148
chr14	100885431-100885432	0.151746	0.520342	-0.368596	0.101413	-3.63459	0.000278428
chr14	100804042-100804043	0.096286	0.473782	-0.377496	0.105554	-3.57633	0.000348448
chr14	99963824-99963825	0.11222	0.477157	-0.364937	0.100828	-3.61938	0.000295309
chr14	100845969-100845970	0.104602	0.438947	-0.334345	0.09086	-3.67978	0.000233433
chr14	100747364-100747365	0.132149	0.495684	-0.363535	0.106226	-3.4223	0.000620941
chr14	100758038-100758039	0.105667	0.419352	-0.313685	0.0863495	-3.63274	0.000280426
chr14	100210272-100210273	0.150888	0.531778	-0.38089	0.116345	-3.2738	0.0010611
chr14	100854644-100854645	0.149244	0.512377	-0.363133	0.112985	-3.21399	0.00130906
chr14	52318208-52318209	0.910799	0.644901	0.265898	0.0715821	3.71459	0.000203536
chr14	34240804-34240805	0.635426	0.918756	-0.283329	0.0796759	-3.55602	0.000376512
chr14	99952958-99952959	0.0882425	0.385979	-0.297737	0.0860565	-3.45978	0.000540609
chr14	103581827-103581828	0.686492	0.37092	0.315572	0.0958064	3.29385	0.000988261
chr14	105923522-105923523	0.75164	0.449495	0.302145	0.090086	3.35396	0.00079663
chr14	11555576-11555577	0.365456	0.0777199	0.287736	0.083833	3.43225	0.000598589
chr14	56885295-56885296	0.219206	0.509432	-0.290227	0.0852447	-3.40463	0.000662547
chr14	101947224-101947225	0.10118	0.397876	-0.296696	0.0893288	-3.32139	0.0008957
chr14	15059575-15059576	0.738378	0.440742	0.297636	0.0904463	3.29075	0.000999216
chr14	56427819-56427820	0.837661	0.568017	0.269645	0.0781633	3.44976	0.000561082
chr14	93805675-93805676	0.76065	0.461228	0.299422	0.0931549	3.21424	0.00130791
chr14	75122585-75122586	0.929965	0.676512	0.253453	0.07216	3.51237	0.000444122
chr14	14537753-14537754	0.876255	0.595421	0.280833	0.0864338	3.24911	0.00115765
chr14	101968310-101968311	0.827205	0.540179	0.287025	0.0902054	3.18191	0.00146307
chr14	88516674-88516675	0.779091	0.503697	0.275395	0.0853834	3.22539	0.00125801
chr14	101947089-101947090	0.470318	0.779838	-0.30952	0.103608	-2.98741	0.00281349
chr14	56817238-56817239	0.920771	0.67244	0.248331	0.0737198	3.36859	0.000755549
chr14	103366206-103366207	0.883043	0.615425	0.267618	0.0841493	3.18028	0.00147135
chr14	100730775-100730776	0.125071	0.406869	-0.281798	0.0924972	-3.04656	0.00231478
chr14	103770532-103770533	0.851479	0.577611	0.273868	0.0885046	3.09439	0.00197218
chr14	120888356-120888357	0.906948	0.652614	0.254333	0.0786631	3.2332	0.00122413
chr14	24650046-24650047	0.869098	0.610689	0.258409	0.0807992	3.19816	0.00138308
chr14	51149898-51149899	0.875326	0.605512	0.269814	0.0869489	3.10313	0.00191486
chr14	57253521-57253522	0.853044	0.562719	0.290325	0.098071	2.96036	0.00307283
chr14	123374105-123374106	0.803637	0.530212	0.273425	0.0896406	3.05024	0.00228659
chr14	79290955-79290956	0.785762	0.510508	0.275254	0.0914582	3.00962	0.00261578
chr14	24847050-24847051	0.749325	0.475584	0.27374	0.09149	2.99202	0.00277135
chr14	24172146-24172147	0.689905	0.938702	-0.248796	0.0784881	-3.16986	0.00152513
chr14	73144493-73144494	0.643542	0.894097	-0.250555	0.0797604	-3.14135	0.00168172
chr14	80221016-80221017	0.69264	0.430678	0.261962	0.0873625	2.99856	0.00271261
chr14	15681213-15681214	0.533025	0.259801	0.273224	0.093662	2.91713	0.00353273
chr14	64581416-64581417	0.846244	0.582223	0.264021	0.0888621	2.97113	0.00296704
chr14	61302841-61302842	0.43842	0.18206	0.25636	0.0848792	3.02029	0.00252534
chr14	99515445-99515446	0.915908	0.676252	0.239656	0.075875	3.15857	0.00158548
chr14	32651035-32651036	0.507449	0.236861	0.270587	0.0928792	2.91332	0.00357602
chr14	71811213-71811214	0.738952	0.46416	0.274792	0.0953803	2.88101	0.00396397
chr14	106576748-106576749	0.787442	0.519027	0.268415	0.0923586	2.90622	0.00365819
chr14	102587858-102587859	0.672186	0.909909	-0.237723	0.0756181	-3.14373	0.00166808
chr14	22326684-22326685	0.777409	0.505163	0.272247	0.0946882	2.87519	0.00403785
chr14	31661726-31661727	0.0399694	0.270252	-0.230283	0.0718275	-3.20605	0.00134571
chr14	108858358-108858359	0.656541	0.894702	-0.238161	0.0762975	-3.12148	0.00179946
chr14	34770081-34770082	0.378361	0.662719	-0.284358	0.102063	-2.78609	0.00533476
chr14	73057982-73057983	0.68107	0.404182	0.276888	0.0983769	2.81456	0.00488434
chr14	52526349-52526350	0.69384	0.422525	0.271315	0.0953838	2.84445	0.00444881
chr14	121254873-121254874	0.934708	0.701573	0.233135	0.0742285	3.14078	0.00168499
chr14	24793641-24793642	0.160729	0.42265	-0.261921	0.0906677	-2.8888	0.00386716
chr14	116286060-116286061	0.820647	0.568235	0.252412	0.0853371	2.95783	0.00309815
chr14	85163555-85163556	0.855689	0.604702	0.250986	0.0849313	2.95517	0.00312501
chr14	92507591-92507592	0.396063	0.139157	0.256905	0.0883019	2.9094	0.00362125
chr14	18399288-18399289	0.929899	0.687901	0.241998	0.0800059	3.02475	0.0024884
chr14	65837077-65837078	0.181773	0.445496	-0.263722	0.0922906	-2.85752	0.00426965
chr14	95317162-95317163	0.980211	0.7562	0.224011	0.0700266	3.19894	0.00137934
chr14	68536021-68536022	0.852901	0.607956	0.244946	0.0819574	2.9887	0.00280171
chr14	58008348-58008349	0.855112	0.599011	0.256101	0.0883379	2.89911	0.00374227
chr14	62275147-62275148	0.865506	0.617708	0.247798	0.0850132	2.91482	0.00355894
chr14	100664449-100664450	0.0975234	0.342137	-0.244614	0.0833466	-2.93489	0.00333661
chr14	77416720-77416721	0.914414	0.677306	0.237108	0.0791258	2.99659	0.00273015
chr14	99631289-99631290	0.0580302	0.28835	-0.23032	0.0752243	-3.06178	0.00220025
chr14	31539601-31539602	0.839338	0.585262	0.254076	0.089005	2.85463	0.00430869
chr14	93105249-93105250	0.83782	0.599269	0.238551	0.0800548	2.97984	0.00288395
chr14	87296092-87296093	0.803827	0.524074	0.279753	0.104045	2.68877	0.00717149
chr14	119218048-119218049	0.987105	0.789254	0.19785	0.0567492	3.4864	0.000489561
chr14	100346585-100346586	0.128232	0.387466	-0.259233	0.0934184	-2.77497	0.00552064
chr14	64808930-64808931	0.805805	0.554982	0.250823	0.0887233	2.82702	0.00469832
chr14	41085718-41085719	0.580188	0.319357	0.260831	0.0947494	2.75285	0.00590793
chr14	37209972-37209973	0.85114	0.609038	0.242101	0.0838159	2.88849	0.00387097
chr14	22707643-22707644	0.788638	0.533162	0.255476	0.0918422	2.78168	0.00540778
chr14	114949157-114949158	0.611173	0.850814	-0.239641	0.082481	-2.90541	0.00366772
chr14	113586022-113586023	0.996868	0.778078	0.21879	0.0701766	3.11771	0.00182262
chr14	122471570-122471571	0.365397	0.126789	0.238608	0.0819202	2.91269	0.00358335
chr14	46932918-46932919	0.674372	0.41104	0.263332	0.0966676	2.7241	0.00644773
chr14	57583246-57583247	0.638889	0.88364	-0.24475	0.0856921	-2.85616	0.00428797
chr14	63946197-63946198	0.959684	0.747028	0.212656	0.0667355	3.18655	0.00143983
chr14	98723284-98723285	0.530464	0.280254	0.250209	0.0890279	2.81046	0.00494708
chr14	119349714-119349715	0.788645	0.525839	0.262807	0.0965922	2.72079	0.00651267
chr14	55494751-55494752	0.967845	0.746572	0.221272	0.0720658	3.07042	0.00213759
chr14	71773931-71773932	0.628932	0.375749	0.253184	0.0913305	2.77217	0.00556836
chr14	101947304-101947305	0.599672	0.85573	-0.256058	0.0934719	-2.73941	0.00615487
chr14	58560018-58560019	0.55725	0.294128	0.263122	0.0981656	2.68038	0.00735376
chr14	94617024-94617025	0.587597	0.831344	-0.243746	0.0865539	-2.81612	0.00486072
chr14	92175667-92175668	0.421486	0.172187	0.249299	0.0902383	2.76267	0.00573301
chr14	120578891-120578892	0.875094	0.644065	0.231029	0.0794603	2.90747	0.0036436
chr15	77378352-77378353	0.495743	0.950033	-0.45429	0.0827445	-5.49028	4.01302e-08
chr15	27422260-27422261	0.486109	0.870961	-0.384852	0.0948518	-4.0574	4.96214e-05
chr15	6444915-6444916	0.729443	0.374946	0.354496	0.0880058	4.0281	5.62293e-05
chr15	73160371-73160372	0.426554	0.905297	-0.478742	0.137275	-3.48746	0.000487627
chr15	76721506-76721507	0.524615	0.165261	0.359354	0.0961226	3.7385	0.00018512
chr15	80672042-80672043	0.420084	0.0516589	0.368425	0.106211	3.4688	0.000522793
chr15	98510999-98511000	0.152571	0.477542	-0.324971	0.0912964	-3.55952	0.000371539
chr15	76721562-76721563	0.563987	0.210257	0.35373	0.104288	3.39186	0.000694196
chr15	70398755-70398756	0.887137	0.604661	0.282476	0.0762342	3.70537	0.000211084
chr15	20873689-20873690	0.616462	0.302863	0.313598	0.0894748	3.50488	0.000456811
chr15	40255870-40255871	0.92373	0.656236	0.267494	0.0728768	3.67049	0.000242082
chr15	100968480-100968481	0.355295	0.0594267	0.295868	0.0855283	3.4593	0.000541578
chr15	86021418-86021419	0.309324	0.0303529	0.278971	0.0783316	3.56142	0.000368861
chr15	26655072-26655073	0.931721	0.655512	0.27621	0.0789265	3.49958	0.00046599
chr15	64163576-64163577	0.383649	0.714367	-0.330718	0.104848	-3.15425	0.00160913
chr15	64718762-64718763	0.791683	0.47212	0.319563	0.100477	3.18047	0.00147036
chr15	65032470-65032471	0.709757	0.973733	-0.263976	0.0759162	-3.4772	0.000506683
chr15	77378511-77378512	0.522327	0.836993	-0.314666	0.100223	-3.13964	0.00169154
chr15	64195835-64195836	0.490562	0.851267	-0.360705	0.122182	-2.9522	0.00315518
chr15	63721082-63721083	0.333368	0.644665	-0.311297	0.0991933	-3.13829	0.00169937
chr15	37883695-37883696	0.965103	0.662317	0.302786	0.0962471	3.14592	0.00165565
chr15	8239180-8239181	0.654458	0.922249	-0.267792	0.0800435	-3.34558	0.00082112
chr15	98772014-98772015	0.775969	0.47303	0.302938	0.0970329	3.12202	0.00179617
chr15	68971933-68971934	0.148678	0.420717	-0.272039	0.0823372	-3.30396	0.000953281
chr15	78539034-78539035	0.709173	0.40639	0.302783	0.0972131	3.11463	0.00184175
chr15	19275016-19275017	0.664498	0.357199	0.307299	0.0997371	3.08109	0.00206245
chr15	64416300-64416301	0.840389	0.550758	0.289631	0.0914809	3.16602	0.00154539
chr15	54268018-54268019	0.822357	0.543295	0.279062	0.0869993	3.20763	0.00133833
chr15	95090305-95090306	0.721802	0.43415	0.287652	0.0921525	3.12147	0.00179948
chr15	76721097-76721098	0.422576	0.127427	0.29515	0.0966604	3.05347	0.00226212
chr15	95052568-95052569	0.464957	0.745292	-0.280334	0.0893389	-3.13788	0.00170177
chr15	94076674-94076675	0.983346	0.751447	0.231899	0.0653608	3.54799	0.000388182
chr15	69079610-69079611	0.655149	0.360674	0.294475	0.0979872	3.00524	0.00265371
chr15	97907721-97907722	0.633297	0.338249	0.295048	0.0990491	2.97881	0.00289375
chr15	52037513-52037514	0.622228	0.326212	0.296016	0.100349	2.94987	0.00317904
chr15	6099270-6099271	0.762282	0.478323	0.283959	0.0943075	3.01099	0.00260395
chr15	76137597-76137598	0.977986	0.757705	0.220281	0.0626465	3.51625	0.000437689
chr15	75728330-75728331	0.57267	0.285059	0.287611	0.0979711	2.93567	0.0033283
chr15	86021413-86021414	0.328158	0.0671601	0.260998	0.0845199	3.088	0.00201507
chr15	94070426-94070427	0.671075	0.918619	-0.247543	0.0775504	-3.19203	0.00141276
chr15	6447932-6447933	0.727854	0.44773	0.280124	0.0949046	2.95163	0.00316097
chr15	31526950-31526951	0.646814	0.376217	0.270597	0.090497	2.99013	0.00278863
chr15	35159103-35159104	0.745439	0.468238	0.277201	0.0941114	2.94546	0.00322475
chr15	88850232-88850233	0.302053	0.0510617	0.250991	0.0802075	3.12928	0.00175237
chr15	71241129-71241130	0.479816	0.769311	-0.289495	0.100788	-2.87232	0.00407467
chr15	54985728-54985729	0.865097	0.59951	0.265587	0.0880972	3.01471	0.00257226
chr15	95340067-95340068	0.798642	0.53148	0.267163	0.0890102	3.00148	0.00268669
chr15	103207508-103207509	0.854193	0.58267	0.271523	0.0914305	2.96972	0.00298075
chr15	75728286-75728287	0.336301	0.0824507	0.25385	0.0820743	3.09293	0.00198188
chr15	101744265-101744266	0.716013	0.421848	0.294165	0.103655	2.83793	0.00454074
chr15	91190819-91190820	0.382598	0.108157	0.274442	0.0944998	2.90415	0.0036825
chr15	95194162-95194163	0.59489	0.318535	0.276355	0.0958421	2.88344	0.00393358
chr15	98505889-98505890	0.820934	0.558334	0.2626	0.0890872	2.94768	0.00320173
chr15	65561905-65561906	0.535307	0.270316	0.264991	0.0904931	2.9283	0.00340822
chr15	94544854-94544855	0.630946	0.355197	0.27575	0.097078	2.84049	0.00450436
chr15	67983987-67983988	0.997359	0.793777	0.203582	0.0574392	3.5443	0.000393657
chr15	86654437-86654438	0.899466	0.671078	0.228388	0.0714206	3.1978	0.00138482
chr15	5943799-5943800	0.846939	0.597682	0.249257	0.0832219	2.99509	0.00274366
chr15	82512673-82512674	0.36208	0.114115	0.247965	0.0826331	3.0008	0.00269275
chr15	58166411-58166412	0.919154	0.682708	0.236447	0.0769426	3.07303	0.002119
chr15	63770471-63770472	0.835929	0.580351	0.255578	0.0878314	2.90987	0.00361582
chr15	88465704-88465705	0.920796	0.681357	0.239439	0.0787914	3.03889	0.00237449
chr15	82794583-82794584	0.35585	0.0987032	0.257146	0.0889058	2.89235	0.00382375
chr15	61726276-61726277	0.942241	0.723149	0.219092	0.0675578	3.24303	0.00118265
chr15	75952254-75952255	0.480785	0.214416	0.266369	0.0948817	2.80738	0.00499457
chr15	6322490-6322491	0.738697	0.460096	0.278601	0.102023	2.73077	0.00631872
chr15	4439356-4439357	0.819682	0.572171	0.247511	0.0843278	2.9351	0.00333437
chr15	82794592-82794593	0.395164	0.13247	0.262694	0.0934505	2.81105	0.00493799
chr15	74619364-74619365	0.944542	0.719469	0.225073	0.0718789	3.13128	0.00174044
chr15	52086989-52086990	0.825043	0.566024	0.259019	0.0914987	2.83085	0.00464242
chr15	20889568-20889569	0.74303	0.469692	0.273337	0.100457	2.72093	0.00650989
chr15	29887813-29887814	0.908182	0.66656	0.241622	0.0821213	2.94226	0.00325826
chr15	47289581-47289582	0.770158	0.515019	0.255139	0.090501	2.81918	0.00481458
chr15	55088864-55088865	0.903996	0.659117	0.24488	0.0848742	2.88521	0.00391154
chr15	77068499-77068500	0.516014	0.249181	0.266833	0.0980243	2.72211	0.00648664
chr15	86698250-86698251	0.869905	0.614108	0.255797	0.0918391	2.78527	0.00534828
chr15	46472906-46472907	0.792671	0.543836	0.248835	0.0880438	2.82626	0.00470946
chr15	84250471-84250472	0.956802	0.732412	0.22439	0.0740572	3.02996	0.00244589
chr15	35372762-35372763	0.951668	0.722498	0.22917	0.0773611	2.96235	0.00305304
chr15	98382760-98382761	0.880325	0.642463	0.237862	0.0826466	2.87807	0.00400121
chr15	80386969-80386970	0.861996	0.604069	0.257927	0.0947898	2.72104	0.00650763
chr15	101368879-101368880	0.976243	0.765348	0.210895	0.0665966	3.16676	0.00154149
chr15	54684354-54684355	0.74788	0.493191	0.254689	0.0933045	2.72965	0.00634015
chr15	48077318-48077319	0.904996	0.657485	0.247511	0.0890332	2.77998	0.00543617
chr15	57637072-57637073	0.838065	0.583643	0.254422	0.0934879	2.72145	0.00649971
chr15	100401602-100401603	0.800907	0.533828	0.267079	0.101231	2.63832	0.0083318
chr15	40654317-40654318	0.374711	0.134553	0.240158	0.0848795	2.8294	0.00466356
chr15	12941842-12941843	0.465194	0.207003	0.258191	0.0958868	2.69267	0.00708829
chr15	39227651-39227652	0.645042	0.91624	-0.271198	0.103853	-2.61136	0.00901835
chr15	49280409-49280410	0.81287	0.570428	0.242442	0.0864311	2.80503	0.0050312
chr15	101849154-101849155	0.898393	0.670674	0.227719	0.0776196	2.93378	0.00334863
chr15	27237299-27237300	0.927779	0.702849	0.224929	0.0759246	2.96254	0.00305116
chr16	27434781-27434782	0.438433	0.959267	-0.520833	0.0714478	-7.2897	3.10635e-13
chr16	22540542-22540543	0.465331	0.841404	-0.376072	0.0818293	-4.59582	4.31059e-06
chr16	45844009-45844010	0.430835	0.0702274	0.360608	0.0881814	4.08939	4.32516e-05
chr16	50133629-50133630	0.959131	0.656084	0.303047	0.0743764	4.0745	4.61134e-05
chr16	4718739-4718740	0.0224932	0.323323	-0.30083	0.0743891	-4.044	5.25472e-05
chr16	67776764-67776765	0.754247	0.414545	0.339702	0.0908891	3.73754	0.000185831
chr16	50415652-50415653	0.975002	0.706233	0.268769	0.0682918	3.9356	8.29893e-05
chr16	75396337-75396338	0.821676	0.51829	0.303386	0.0828221	3.6631	0.000249183
chr16	94891825-94891826	0.810717	0.510192	0.300524	0.0829304	3.62382	0.000290288
chr16	42735703-42735704	0.92806	0.646164	0.281896	0.0760511	3.70667	0.000210005
chr16	88128850-88128851	0.929136	0.615066	0.31407	0.0913582	3.43779	0.00058649
chr16	42355644-42355645	0.785974	0.485706	0.300268	0.0858453	3.49778	0.000469148
chr16	7419152-7419153	0.867431	0.565088	0.302343	0.0890571	3.39493	0.00068646
chr16	76114189-76114190	0.945088	0.687861	0.257227	0.0694043	3.70621	0.000210386
chr16	14275702-14275703	0.868553	0.58401	0.284542	0.0857374	3.31877	0.000904161
chr16	27079811-27079812	0.786129	0.484664	0.301465	0.0939179	3.20988	0.00132792
chr16	78317219-78317220	0.706361	0.384203	0.322158	0.105183	3.06284	0.00219249
chr16	37426022-37426023	0.86119	0.58017	0.28102	0.0856995	3.27914	0.00104126
chr16	4718729-4718730	0.030579	0.278685	-0.248106	0.0705811	-3.51519	0.000439442
chr16	90710829-90710830	0.562988	0.860777	-0.297789	0.0954287	-3.12054	0.00180519
chr16	38817631-38817632	0.382563	0.114404	0.268159	0.0815634	3.28774	0.00100995
chr16	30010070-30010071	0.357898	0.0649275	0.29297	0.0942194	3.10945	0.00187436
chr16	89198811-89198812	0.563336	0.280904	0.282432	0.0892456	3.16466	0.00155266
chr16	95438732-95438733	0.920734	0.668642	0.252092	0.0748021	3.37012	0.000751344
chr16	63058820-63058821	0.712062	0.44046	0.271602	0.0850609	3.19302	0.00140791
chr16	39245664-39245665	0.930558	0.6878	0.242758	0.0709145	3.42325	0.000618769
chr16	3444416-3444417	0.777076	0.492142	0.284934	0.0920985	3.09379	0.00197615
chr16	66558060-66558061	0.784314	0.514663	0.269651	0.0847191	3.18288	0.00145818
chr16	25912624-25912625	0.603861	0.323509	0.280352	0.0909905	3.08112	0.00206225
chr16	30060389-30060390	0.541873	0.247304	0.294569	0.0983655	2.99463	0.00274774
chr16	36770446-36770447	0.686241	0.969444	-0.283203	0.0927881	-3.05215	0.00227209
chr16	22848566-22848567	0.484404	0.781178	-0.296774	0.100265	-2.95989	0.00307753
chr16	76237705-76237706	0.614059	0.343578	0.270481	0.0878597	3.07855	0.00208009
chr16	88030831-88030832	0.448266	0.177117	0.271148	0.0887732	3.05439	0.00225517
chr16	4718668-4718669	0.0208296	0.247609	-0.22678	0.0667877	-3.39553	0.000684961
chr16	7037678-7037679	0.320933	0.0653125	0.25562	0.0828043	3.08704	0.00202159
chr16	93874950-93874951	0.44832	0.184782	0.263538	0.0874388	3.01397	0.00257857
chr16	22450133-22450134	0.220447	0.486269	-0.265822	0.088936	-2.98892	0.0027997
chr16	91935634-91935635	0.696768	0.422504	0.274264	0.0938863	2.92123	0.00348647
chr16	87454505-87454506	0.0215467	0.239111	-0.217565	0.0636118	-3.42019	0.000625766
chr16	5781671-5781672	0.885778	0.629921	0.255857	0.0846848	3.02129	0.002517
chr16	93589947-93589948	0.604154	0.874087	-0.269933	0.0926409	-2.91376	0.00357109
chr16	70243980-70243981	0.874552	0.630178	0.244374	0.0792078	3.08522	0.00203398
chr16	14487757-14487758	0.428373	0.7355	-0.307127	0.113842	-2.69783	0.00697934
chr16	87746284-87746285	0.481593	0.20623	0.275363	0.0963286	2.85858	0.00425541
chr16	45843688-45843689	0.30813	0.0657348	0.242395	0.0785688	3.08514	0.00203458
chr16	5423162-5423163	0.660432	0.377445	0.282988	0.101382	2.79131	0.00524945
chr16	73770454-73770455	0.802575	0.547233	0.255342	0.0860728	2.96658	0.00301133
chr16	87244718-87244719	0.968461	0.753804	0.214657	0.0642907	3.33886	0.000841241
chr16	64902290-64902291	0.656954	0.373821	0.283133	0.102844	2.75302	0.00590475
chr16	94098594-94098595	0.786505	0.524909	0.261596	0.0907498	2.88261	0.00394396
chr16	93003373-93003374	0.907655	0.6724	0.235255	0.076019	3.09469	0.00197019
chr16	89830548-89830549	0.909848	0.663683	0.246165	0.0821892	2.9951	0.00274352
chr16	37775258-37775259	0.836156	0.582131	0.254025	0.0868746	2.92404	0.00345516
chr16	93512715-93512716	0.544472	0.818378	-0.273906	0.0982003	-2.78925	0.00528299
chr16	49667656-49667657	0.659395	0.387014	0.272381	0.0978027	2.78501	0.00535261
chr16	95498503-95498504	0.778165	0.518944	0.259221	0.0904969	2.86442	0.00417776
chr16	97352423-97352424	0.954774	0.706256	0.248518	0.0848561	2.9287	0.00340387
chr16	91268646-91268647	0.26126	0.0374492	0.223811	0.0711985	3.14348	0.00166952
chr16	67107070-67107071	0.253469	0.0398212	0.213648	0.0658149	3.24619	0.00116961
chr16	88304225-88304226	0.89103	0.657064	0.233966	0.0776924	3.01144	0.00260014
chr16	29945274-29945275	0.587086	0.854885	-0.267799	0.0973608	-2.75059	0.00594886
chr16	37926325-37926326	0.857075	0.609117	0.247959	0.085874	2.88747	0.00388351
chr16	62418732-62418733	0.683828	0.425095	0.258734	0.0924162	2.79966	0.00511572
chr16	17402728-17402729	0.891231	0.654776	0.236454	0.0798286	2.96203	0.00305621
chr16	33933647-33933648	0.4356	0.177531	0.258069	0.0926529	2.78533	0.00534728
chr16	59396418-59396419	0.727546	0.453181	0.274365	0.102339	2.68093	0.00734174
chr16	18227428-18227429	0.96818	0.732359	0.235821	0.0796745	2.95981	0.00307831
chr16	47081183-47081184	0.944858	0.733587	0.211271	0.0655687	3.22213	0.0012724
chr16	54006638-54006639	0.931859	0.708553	0.223306	0.0728713	3.06439	0.00218115
chr16	29682583-29682584	0.726024	0.952368	-0.226344	0.0747053	-3.02983	0.00244692
chr16	93589932-93589933	0.594887	0.851561	-0.256674	0.0927911	-2.76615	0.0056723
chr16	89557407-89557408	0.821686	0.584213	0.237472	0.0816269	2.90924	0.00362306
chr16	13978100-13978101	0.740839	0.963764	-0.222925	0.073099	-3.04964	0.00229119
chr16	4718696-4718697	0.0211274	0.223679	-0.202552	0.0611414	-3.31284	0.000923551
chr16	19081917-19081918	0.9082	0.679662	0.228537	0.0769452	2.97013	0.00297677
chr16	59399765-59399766	0.724774	0.475107	0.249667	0.089686	2.7838	0.00537268
chr16	52241523-52241524	0.97069	0.753025	0.217664	0.0705953	3.08327	0.00204739
chr16	60736761-60736762	0.398014	0.147456	0.250558	0.0905228	2.7679	0.00564195
chr16	91213943-91213944	0.951005	0.693762	0.257243	0.094613	2.71889	0.0065501
chr16	49289111-49289112	0.896786	0.672712	0.224074	0.0748771	2.99256	0.0027665
chr16	12344268-12344269	0.927486	0.700662	0.226823	0.076853	2.95139	0.00316343
chr16	36516636-36516637	0.779184	0.512834	0.266351	0.100929	2.63898	0.00831565
chr16	91045389-91045390	0.641935	0.883266	-0.241331	0.0858016	-2.81266	0.00491336
chr17	23802469-23802470	0.0663683	0.446658	-0.38029	0.0787426	-4.82953	1.36856e-06
chr17	27701487-27701488	0.0562345	0.492649	-0.436414	0.0972486	-4.48762	7.20239e-06
chr17	27489372-27489373	0.0785088	0.521349	-0.44284	0.10213	-4.33605	1.45065e-05
chr17	30552675-30552676	0.0134796	0.401073	-0.387593	0.0878633	-4.41132	1.02741e-05
chr17	32777149-32777150	0.132394	0.582774	-0.45038	0.109342	-4.11899	3.80531e-05
chr17	88160729-88160730	0.4139	0.797018	-0.383118	0.09826	-3.89902	9.65825e-05
chr17	67514759-67514760	0.532263	0.872253	-0.33999	0.0994718	-3.41795	0.000630938
chr17	46680073-46680074	0.484394	0.159013	0.325381	0.095839	3.39508	0.000686083
chr17	28009613-28009614	0.21496	0.567452	-0.352492	0.107634	-3.2749	0.00105698
chr17	61070828-61070829	0.960005	0.703746	0.256259	0.0668233	3.83487	0.000125629
chr17	66364262-66364263	0.703631	0.978388	-0.274757	0.0748007	-3.67319	0.000239546
chr17	24842951-24842952	0.694976	0.367822	0.327154	0.0977248	3.34771	0.000814823
chr17	8805130-8805131	0.576302	0.252231	0.324071	0.0967252	3.35043	0.000806859
chr17	56720795-56720796	0.694797	0.975041	-0.280245	0.0778033	-3.60196	0.000315824
chr17	30640660-30640661	0.822969	0.522423	0.300546	0.0895218	3.35724	0.00078726
chr17	58535055-58535056	0.966012	0.692131	0.273881	0.0777026	3.52474	0.000423906
chr17	45705257-45705258	0.172702	0.486642	-0.31394	0.098139	-3.19893	0.00137937
chr17	11125585-11125586	0.916213	0.628663	0.287551	0.0863467	3.33019	0.000867872
chr17	87922118-87922119	0.641604	0.323473	0.318131	0.101566	3.13225	0.0017347
chr17	56115139-56115140	0.787229	0.488541	0.298688	0.0934062	3.19773	0.00138515
chr17	46889024-46889025	0.0129594	0.264318	-0.251358	0.0716623	-3.50754	0.000452266
chr17	18980150-18980151	0.806382	0.528121	0.278261	0.085399	3.25836	0.00112058
chr17	35030270-35030271	0.701573	0.379878	0.321696	0.106754	3.01344	0.00258307
chr17	30240830-30240831	0.960577	0.709591	0.250986	0.0734852	3.41547	0.000636725
chr17	88815813-88815814	0.566261	0.855297	-0.289036	0.0928702	-3.11226	0.00185662
chr17	46756337-46756338	0.791434	0.495496	0.295938	0.0980718	3.01756	0.00254818
chr17	27578702-27578703	0.300264	0.591884	-0.291621	0.0960276	-3.03684	0.00239071
chr17	48308243-48308244	0.868916	0.580878	0.288039	0.0946868	3.04201	0.00235001
chr17	29787188-29787189	0.86858	0.596038	0.272541	0.087999	3.09709	0.00195427
chr17	84785918-84785919	0.88865	0.604116	0.284534	0.0941394	3.02248	0.00250711
chr17	4356773-4356774	0.922069	0.670704	0.251365	0.0773239	3.2508	0.00115079
chr17	16147621-16147622	0.193461	0.520868	-0.327408	0.116797	-2.80322	0.00505951
chr17	85626264-85626265	0.0905734	0.351912	-0.261339	0.0832562	-3.13897	0.00169543
chr17	94601460-94601461	0.724625	0.42013	0.304495	0.106013	2.87224	0.00407573
chr17	94441073-94441074	0.891808	0.646306	0.245502	0.0766903	3.20121	0.0013685
chr17	42576954-42576955	0.876074	0.615052	0.261023	0.0851671	3.06483	0.00217795
chr17	46439688-46439689	0.709912	0.416085	0.293827	0.103805	2.83056	0.00464661
chr17	80737019-80737020	0.912724	0.642957	0.269767	0.0911204	2.96056	0.00307084
chr17	47920684-47920685	0.85517	0.566583	0.288587	0.101257	2.85004	0.00437141
chr17	20086384-20086385	0.608746	0.337496	0.271251	0.0920518	2.94672	0.00321166
chr17	62907180-62907181	0.938271	0.700825	0.237446	0.0741656	3.20157	0.00136683
chr17	58074601-58074602	0.882392	0.639787	0.242604	0.0769712	3.15188	0.00162221
chr17	80829453-80829454	0.612104	0.313556	0.298549	0.107321	2.78184	0.00540521
chr17	30576991-30576992	0.178982	0.452075	-0.273093	0.093653	-2.91601	0.00354539
chr17	10903866-10903867	0.375909	0.65214	-0.276231	0.0955083	-2.89222	0.00382527
chr17	31050066-31050067	0.0602924	0.287746	-0.227454	0.0691002	-3.29165	0.000996003
chr17	67694301-67694302	0.788418	0.524344	0.264074	0.0893542	2.95536	0.00312302
chr17	23802649-23802650	0.0274665	0.250001	-0.222535	0.0674073	-3.30135	0.000962217
chr17	78727153-78727154	0.711143	0.940503	-0.22936	0.0717328	-3.19742	0.00138663
chr17	14374634-14374635	0.984149	0.751239	0.23291	0.0737747	3.15705	0.00159375
chr17	4865119-4865120	0.972411	0.757672	0.21474	0.0638335	3.36405	0.000768063
chr17	71815654-71815655	0.821269	0.566427	0.254842	0.086504	2.94601	0.00321898
chr17	23542334-23542335	0.366996	0.108973	0.258023	0.0885604	2.91353	0.00357367
chr17	62872134-62872135	0.692855	0.417399	0.275456	0.0991675	2.77769	0.00547475
chr17	90327713-90327714	0.548012	0.290535	0.257476	0.0890565	2.89116	0.00383824
chr17	34080001-34080002	0.827357	0.55231	0.275047	0.0998297	2.75517	0.00586623
chr17	41563954-41563955	0.459749	0.209447	0.250303	0.0857482	2.91905	0.00351105
chr17	67970717-67970718	0.94069	0.704324	0.236366	0.0783746	3.01586	0.00256254
chr17	66364166-66364167	0.655032	0.919101	-0.264069	0.0945756	-2.79214	0.00523601
chr17	28445204-28445205	0.951956	0.72809	0.223865	0.0714756	3.13205	0.00173589
chr17	21558035-21558036	0.550744	0.806403	-0.255659	0.0900344	-2.83958	0.00451735
chr17	10489788-10489789	0.932634	0.694409	0.238225	0.0801284	2.97304	0.00294864
chr17	30205268-30205269	0.89357	0.632867	0.260703	0.093392	2.79149	0.00524658
chr17	83277310-83277311	0.554244	0.81505	-0.260805	0.0942566	-2.76697	0.00565795
chr17	56194545-56194546	0.996441	0.766093	0.230349	0.0763822	3.01574	0.00256352
chr17	30130850-30130851	0.874591	0.629857	0.244734	0.0850383	2.87793	0.00400292
chr17	74845825-74845826	0.977853	0.752817	0.225035	0.073602	3.05746	0.00223221
chr17	71888489-71888490	0.677464	0.406198	0.271266	0.101046	2.68459	0.0072619
chr17	83963003-83963004	0.353244	0.103458	0.249785	0.0883422	2.82748	0.00469166
chr17	71014731-71014732	0.89666	0.648472	0.248188	0.087436	2.83851	0.00453249
chr17	69965972-69965973	0.802922	0.545329	0.257594	0.0933069	2.76072	0.0057675
chr17	20293184-20293185	0.616839	0.354334	0.262505	0.0970917	2.70368	0.0068576
chr17	46771884-46771885	0.0145486	0.23053	-0.215982	0.0693587	-3.11398	0.00184581
chr17	11037865-11037866	0.77516	0.456081	0.319079	0.131686	2.42303	0.0153915
chr17	68216839-68216840	0.712735	0.453492	0.259243	0.0954542	2.71589	0.00660987
chr17	10336013-10336014	0.521098	0.261162	0.259936	0.0962262	2.70131	0.00690677
chr17	80161449-80161450	0.974685	0.758283	0.216402	0.0701228	3.08604	0.00202839
chr17	34095073-34095074	0.996125	0.794741	0.201384	0.0613291	3.28366	0.00102468
chr17	12615726-12615727	0.808956	0.541891	0.267065	0.101282	2.63684	0.00836823
chr17	76804376-76804377	0.775526	0.524713	0.250813	0.0914344	2.74309	0.00608633
chr17	30366819-30366820	0.953153	0.747042	0.20611	0.0643279	3.20406	0.00135505
chr17	46920889-46920890	0.95398	0.736378	0.217602	0.0714789	3.04428	0.00233236
chr18	65213706-65213707	0.30503	0.731192	-0.426161	0.085994	-4.95571	7.20667e-07
chr18	82705132-82705133	0.520893	0.106608	0.414286	0.0886917	4.67107	2.99628e-06
chr18	65580371-65580372	0.132679	0.527533	-0.394854	0.0863221	-4.5742	4.78049e-06
chr18	34955395-34955396	0.259367	0.648615	-0.389248	0.0928123	-4.19392	2.74171e-05
chr18	68193654-68193655	0.655465	0.942691	-0.287226	0.0728438	-3.94304	8.04558e-05
chr18	68193550-68193551	0.662222	0.954135	-0.291913	0.0761451	-3.83363	0.000126264
chr18	65580282-65580283	0.674532	0.954947	-0.280414	0.0742053	-3.7789	0.000157525
chr18	65213676-65213677	0.492585	0.799403	-0.306817	0.08643	-3.54989	0.000385388
chr18	35237023-35237024	0.646843	0.95162	-0.304777	0.0875553	-3.48097	0.000499602
chr18	34955871-34955872	0.462992	0.76794	-0.304947	0.0887685	-3.43531	0.000591881
chr18	65219564-65219565	0.477057	0.78803	-0.310973	0.0919725	-3.38115	0.000721833
chr18	65579933-65579934	0.562641	0.867848	-0.305207	0.092307	-3.30643	0.000944914
chr18	23276133-23276134	0.76936	0.478712	0.290648	0.0887786	3.27385	0.00106093
chr18	36988480-36988481	0.691545	0.971256	-0.279711	0.0844472	-3.31226	0.000925449
chr18	34955244-34955245	0.0828558	0.35007	-0.267214	0.0785827	-3.40042	0.000672836
chr18	65024443-65024444	0.730891	0.441812	0.289079	0.0897093	3.22239	0.00127125
chr18	79896753-79896754	0.672782	0.926978	-0.254196	0.07406	-3.43229	0.000598499
chr18	37767430-37767431	0.480796	0.183109	0.297687	0.0953162	3.12316	0.00178923
chr18	81142781-81142782	0.861987	0.569404	0.292582	0.0937068	3.12232	0.00179432
chr18	14931053-14931054	0.90408	0.642517	0.261562	0.0787877	3.31984	0.000900702
chr18	66592102-66592103	0.972029	0.742692	0.229336	0.0638339	3.59271	0.00032726
chr18	83795414-83795415	0.86084	0.589869	0.270971	0.0844269	3.20953	0.00132951
chr18	66862383-66862384	0.677596	0.389651	0.287946	0.0934261	3.08207	0.00205567
chr18	90125071-90125072	0.707053	0.415262	0.291791	0.0955973	3.05229	0.002271
chr18	36968720-36968721	0.346292	0.647205	-0.300913	0.1005	-2.99417	0.00275195
chr18	7173636-7173637	0.934798	0.687823	0.246975	0.0748479	3.2997	0.000967896
chr18	71578768-71578769	0.842301	0.575719	0.266582	0.0857739	3.10797	0.0018838
chr18	75273563-75273564	0.690957	0.950568	-0.259611	0.0827006	-3.13917	0.00169427
chr18	30445458-30445459	0.69809	0.936451	-0.238361	0.0719405	-3.3133	0.000922017
chr18	42447020-42447021	0.975895	0.722395	0.253501	0.0798767	3.17365	0.00150533
chr18	22066960-22066961	0.535683	0.827509	-0.291826	0.099987	-2.91864	0.00351566
chr18	34222291-34222292	0.35149	0.099402	0.252088	0.0794041	3.17475	0.00149966
chr18	88500104-88500105	0.725654	0.463494	0.26216	0.0847372	3.0938	0.00197611
chr18	78553691-78553692	0.740651	0.476165	0.264486	0.0869533	3.0417	0.0023525
chr18	53497684-53497685	0.77984	0.996996	-0.217156	0.0620323	-3.50069	0.000464049
chr18	84400711-84400712	0.338431	0.673747	-0.335316	0.12547	-2.67247	0.0075295
chr18	81557590-81557591	0.932064	0.687999	0.244065	0.0767178	3.18134	0.00146597
chr18	36430800-36430801	0.87533	0.585268	0.290062	0.101563	2.85598	0.00429044
chr18	24710452-24710453	0.594361	0.267647	0.326713	0.122078	2.67627	0.00744458
chr18	68403600-68403601	0.8063	0.540944	0.265356	0.08892	2.98421	0.00284309
chr18	58080506-58080507	0.932578	0.697481	0.235097	0.0727576	3.23124	0.00123254
chr18	69832693-69832694	0.965523	0.748943	0.216581	0.0629015	3.44317	0.000574932
chr18	75898511-75898512	0.715733	0.957588	-0.241854	0.0767775	-3.15007	0.00163231
chr18	82309714-82309715	0.917396	0.671802	0.245594	0.0788198	3.1159	0.00183387
chr18	56628670-56628671	0.981413	0.756718	0.224695	0.0687305	3.26922	0.00107843
chr18	13755897-13755898	0.960247	0.743669	0.216578	0.0646732	3.34881	0.000811582
chr18	71342774-71342775	0.560721	0.296396	0.264326	0.0913688	2.89295	0.00381639
chr18	36016363-36016364	0.743528	0.456374	0.287153	0.104153	2.75704	0.0058328
chr18	88664817-88664818	0.582457	0.312306	0.27015	0.0946871	2.85308	0.00432975
chr18	11858404-11858405	0.166529	0.428711	-0.262182	0.091521	-2.86472	0.00417376
chr18	7297141-7297142	0.736782	0.474089	0.262693	0.0921542	2.85058	0.00436391
chr18	79795687-79795688	0.851968	0.612587	0.239381	0.0789679	3.03138	0.00243441
chr18	70274137-70274138	0.839845	0.592266	0.247578	0.0843535	2.93501	0.00333538
chr18	76853907-76853908	0.0951158	0.336262	-0.241146	0.0807127	-2.98771	0.0028108
chr18	61619139-61619140	0.711547	0.948808	-0.237261	0.078721	-3.01395	0.00257868
chr18	36167372-36167373	0.614784	0.347915	0.266868	0.0959518	2.78128	0.00541457
chr18	24744706-24744707	0.800326	0.532264	0.268061	0.0975105	2.74905	0.00597684
chr18	3354390-3354391	0.926582	0.681381	0.245201	0.0849685	2.88579	0.00390439
chr18	43497982-43497983	0.422344	0.67637	-0.254025	0.0904647	-2.80801	0.00498494
chr18	29366557-29366558	0.962427	0.755533	0.206894	0.0631336	3.27709	0.00104883
chr18	69196564-69196565	0.840569	0.589544	0.251025	0.0893584	2.80919	0.00496664
chr18	90471187-90471188	0.967571	0.740011	0.22756	0.0757538	3.00394	0.0026651
chr18	49702704-49702705	0.894009	0.658437	0.235572	0.0805501	2.92454	0.00344965
chr18	89202294-89202295	0.87684	0.652254	0.224586	0.074464	3.01603	0.00256109
chr18	84337243-84337244	0.393824	0.718433	-0.324609	0.135056	-2.40352	0.0162381
chr18	12851787-12851788	0.792026	0.536701	0.255325	0.0930216	2.7448	0.00605485
chr18	58404508-58404509	0.280497	0.535947	-0.25545	0.0935085	-2.73183	0.0062983
chr18	15085118-15085119	0.610798	0.860705	-0.249907	0.0902483	-2.7691	0.00562115
chr18	73846251-73846252	0.727724	0.46621	0.261514	0.0975775	2.68007	0.00736072
chr18	64145213-64145214	0.928773	0.707032	0.221742	0.0736206	3.01195	0.00259576
chr19	30029922-30029923	0.131476	0.643932	-0.512456	0.086866	-5.89938	3.6486e-09
chr19	39648518-39648519	0.334565	0.814649	-0.480085	0.0808965	-5.93455	2.94644e-09
chr19	30029469-30029470	0.500364	0.89554	-0.395176	0.0868242	-4.55145	5.32762e-06
chr19	39648555-39648556	0.548058	0.880184	-0.332126	0.080038	-4.14961	3.33049e-05
chr19	40894154-40894155	0.555539	0.912939	-0.3574	0.0928935	-3.84742	0.000119368
chr19	39648563-39648564	0.595589	0.900856	-0.305267	0.0778671	-3.92037	8.84149e-05
chr19	30029664-30029665	0.458025	0.786218	-0.328193	0.0872494	-3.76155	0.000168867
chr19	38299279-38299280	0.576217	0.244491	0.331725	0.0962486	3.44655	0.000567802
chr19	59192433-59192434	0.576345	0.2421	0.334245	0.0976883	3.42155	0.000622661
chr19	36897928-36897929	0.835842	0.52281	0.313032	0.0942609	3.32091	0.000897241
chr19	5294323-5294324	0.949145	0.687453	0.261692	0.0737705	3.54738	0.000389078
chr19	37878295-37878296	0.40349	0.101836	0.301655	0.0921224	3.2745	0.0010585
chr19	28453155-28453156	0.936123	0.674434	0.261689	0.0761093	3.43833	0.000585324
chr19	50418731-50418732	0.652067	0.343498	0.308569	0.0982689	3.14004	0.00168924
chr19	6547957-6547958	0.952575	0.690787	0.261788	0.0774894	3.37838	0.000729155
chr19	27145033-27145034	0.930631	0.683905	0.246726	0.0720016	3.42667	0.000611023
chr19	50026796-50026797	0.595803	0.31254	0.283264	0.0902869	3.13737	0.00170469
chr19	42086699-42086700	0.841885	0.569983	0.271901	0.0848353	3.20505	0.00135041
chr19	38679477-38679478	0.730241	0.446845	0.283397	0.0918801	3.08442	0.00203951
chr19	42904517-42904518	0.808035	0.53527	0.272765	0.0873852	3.12141	0.00179986
chr19	58231522-58231523	0.809353	0.524061	0.285292	0.0945348	3.01786	0.0025457
chr19	30555162-30555163	0.648836	0.367083	0.281753	0.0931334	3.02527	0.00248413
chr19	60472461-60472462	0.971687	0.752656	0.219031	0.0619894	3.53336	0.000410311
chr19	30029545-30029546	0.715517	0.955431	-0.239914	0.0737771	-3.25188	0.00114645
chr19	18760796-18760797	0.81874	0.554088	0.264653	0.08708	3.03919	0.00237215
chr19	21396643-21396644	0.706516	0.434144	0.272372	0.0915258	2.97591	0.0029212
chr19	44393488-44393489	0.96325	0.724447	0.238803	0.0740113	3.22658	0.00125279
chr19	24519348-24519349	0.88577	0.620914	0.264856	0.0887878	2.98302	0.00285418
chr19	55470011-55470012	0.379585	0.120691	0.258894	0.0857078	3.02065	0.0025223
chr19	59163823-59163824	0.478094	0.189366	0.288728	0.101866	2.8344	0.00459125
chr19	58231521-58231522	0.854019	0.59258	0.261439	0.0876377	2.98318	0.00285269
chr19	8770772-8770773	0.469006	0.747639	-0.278634	0.0985596	-2.82706	0.00469778
chr19	28713597-28713598	0.937939	0.716086	0.221853	0.067893	3.26769	0.0010843
chr19	42209447-42209448	0.969877	0.747184	0.222694	0.0690954	3.22298	0.00126862
chr19	41738490-41738491	0.0971299	0.348696	-0.251566	0.0864585	-2.90967	0.00361809
chr19	56756132-56756133	0.937881	0.701373	0.236507	0.0781742	3.02539	0.00248313
chr19	10473315-10473316	0.728018	0.443145	0.284873	0.106103	2.68487	0.00725578
chr19	58738081-58738082	0.639345	0.885841	-0.246496	0.0843377	-2.92272	0.00346989
chr19	23834536-23834537	0.549058	0.81404	-0.264982	0.0954774	-2.77534	0.00551437
chr19	59132700-59132701	0.912683	0.675274	0.237409	0.0796393	2.98105	0.0028726
chr19	54528691-54528692	0.911944	0.689409	0.222535	0.0712281	3.12426	0.00178252
chr19	22422673-22422674	0.650028	0.379243	0.270785	0.101421	2.66991	0.00758712
chr19	56103122-56103123	0.936217	0.701888	0.234329	0.0798887	2.93319	0.00335495
chr19	30132489-30132490	0.701797	0.435137	0.26666	0.0992161	2.68767	0.0071953
chr19	23396307-23396308	0.854393	0.616847	0.237546	0.0823237	2.88551	0.00390779
chr19	56689101-56689102	0.177033	0.418855	-0.241821	0.0853122	-2.83454	0.00458913
chr19	28140234-28140235	0.997034	0.783758	0.213276	0.068208	3.12684	0.00176695
chr19	11911547-11911548	0.243319	0.49586	-0.252541	0.0921791	-2.73968	0.00614995
chr19	25548288-25548289	0.956596	0.738141	0.218455	0.0718016	3.04248	0.0023464
[truncated: 61 more rows]

## Sheet: D- vs D+ DMRs
chr	start	end	length	nCG	D- methylation	D+ methylation	methylation difference	areaStat
chr1	52656438	52656523	86	3	0.761149	0.926056	-0.164907	-7.17461
chr1	72166088	72166245	158	4	0.569649	0.879255	-0.309606	-14.2719
chr1	155343042	155343219	178	3	0.813595	0.573417	0.240177	8.75987
chr1	162840111	162840267	157	3	0.28717	0.512773	-0.225603	-7.47746
chr1	166158812	166158942	131	3	0.675762	0.418746	0.257016	7.80554
chr1	182410236	182410417	182	4	0.611645	0.449468	0.162176	7.64056
chr1	189666304	189666470	167	3	0.341232	0.544084	-0.202853	-6.5366
chr1	190018528	190018768	241	3	0.660535	0.431008	0.229526	7.03086
chr2	4937371	4937693	323	5	0.478213	0.682941	-0.204727	-11.4062
chr2	84810790	84811329	540	8	0.769864	0.310916	0.458948	37.2535
chr2	105312104	105312266	163	3	0.256643	0.513597	-0.256954	-7.65653
chr2	115995964	115996153	190	4	0.392325	0.807931	-0.415606	-19.2819
chr3	14800091	14800269	179	3	0.33539	0.70905	-0.37366	-12.4617
chr3	18238924	18242597	3674	5	0.614934	0.815371	-0.200438	-11.864
chr3	31074031	31074772	742	3	0.606166	0.842741	-0.236575	-7.51222
chr3	59262224	59262847	624	8	0.57417	0.265644	0.308525	25.9986
chr3	67510834	67514526	3693	5	0.766669	0.459319	0.30735	17.5015
chr3	85973111	85975107	1997	3	0.502544	0.303109	0.199435	6.20469
chr3	94682555	94684252	1698	3	0.581038	0.853007	-0.271969	-9.05102
chr3	94695165	94697030	1866	3	0.661353	0.911269	-0.249915	-9.02026
chr3	122965671	122965726	56	4	0.766933	0.937416	-0.170483	-9.28259
chr3	145774549	145774778	230	3	0.237492	0.573842	-0.336349	-10.4273
chr4	61781086	61781221	136	4	0.755369	0.933982	-0.178613	-9.20096
chr4	124663157	124664446	1290	3	0.532376	0.724881	-0.192505	-6.82774
chr4	154568748	154568799	52	4	0.926242	0.747969	0.178274	8.91291
chr5	4024213	4024367	155	3	0.805972	0.947765	-0.141793	-6.49177
chr5	22559449	22559622	174	3	0.605808	0.804016	-0.198208	-7.81561
chr5	72581809	72582000	192	3	0.551859	0.790973	-0.239114	-8.59842
chr5	87081031	87081205	175	4	0.246789	0.517858	-0.271069	-11.85
chr5	103761733	103761837	105	3	0.439522	0.835915	-0.396393	-14.0733
chr5	105798469	105800021	1553	3	0.199397	0.421372	-0.221975	-6.95675
chr5	111156216	111156296	81	3	0.979954	0.822788	0.157166	7.17716
chr5	134423492	134423723	232	3	0.495888	0.751925	-0.256037	-7.38479
chr5	135824383	135824995	613	3	0.945024	0.730318	0.214706	7.57783
chr5	136599749	136600704	956	3	0.921317	0.466438	0.45488	16.704
chr5	149400102	149400462	361	3	0.997085	0.891547	0.105538	6.06808
chr6	71847034	71847108	75	3	0.94082	0.631515	0.309305	7.99493
chr6	72153676	72153854	179	3	0.859592	0.615486	0.244106	8.00704
chr6	144491423	144491523	101	3	0.468806	0.762856	-0.294051	-8.81354
chr6	146127243	146127472	230	3	0.463476	0.208639	0.254837	7.79033
chr7	68280518	68280670	153	6	0.494839	0.711415	-0.216576	-13.1869
chr8	20004773	20004890	118	3	0.913228	0.739723	0.173505	8.12101
chr8	22381746	22381818	73	4	0.726173	0.946078	-0.219905	-11.2335
chr8	35344967	35345087	121	3	0.801405	0.507378	0.294027	8.77418
chr8	57498676	57498764	89	3	0.194588	0.530424	-0.335836	-10.5116
chr8	106633696	106633845	150	3	0.104045	0.323122	-0.219077	-6.53283
chr8	119413744	119413799	56	3	0.64213	0.871143	-0.229013	-7.59
chr9	35339577	35339668	92	3	0.967835	0.832316	0.135519	6.56978
chr9	63327810	63327951	142	4	0.391006	0.63233	-0.241324	-9.89916
chr9	66218525	66219537	1013	4	0.748292	0.54202	0.206273	6.35106
chr10	8545004	8545057	54	5	0.762947	0.92427	-0.161323	-11.308
chr10	26630116	26630473	358	4	0.587207	0.756323	-0.169117	-6.41022	no
chr10	59380752	59382107	1356	3	0.421259	0.596676	-0.175417	-4.74984
chr10	123123049	123123169	121	3	0.154617	0.326539	-0.171922	-6.22637
chr11	51129910	51130044	135	3	0.915065	0.728421	0.186644	6.73112
chr11	67359949	67360291	343	3	0.698418	0.882998	-0.184581	-7.22065
chr11	70944551	70944682	132	3	0.920565	0.748336	0.172229	6.62597
chr11	85391332	85391396	65	3	0.368978	0.742774	-0.373796	-10.8478
chr11	99437747	99437974	228	4	0.761615	0.574345	0.187269	8.91825
chr12	39956351	39956423	73	3	0.932406	0.762847	0.169559	7.30108
chr12	72624788	72625310	523	5	0.58677	0.809251	-0.222481	-12.6701
chr12	73867014	73867067	54	5	0.364338	0.698336	-0.333998	-15.626
chr13	13863612	13863709	98	3	0.632006	0.811837	-0.179831	-6.44293
chr13	18121186	18121548	363	4	0.49439	0.723379	-0.228989	-9.30682	no
chr13	46043883	46044288	406	3	0.623199	0.817623	-0.194424	-6.52745
chr14	79535487	79535606	120	3	0.683606	0.866461	-0.182855	-6.49231
chr14	121137187	121137248	62	3	0.931722	0.765879	0.165843	6.30339
chr15	8324512	8324652	141	4	0.558479	0.82073	-0.262252	-12.7692
chr15	27422011	27422299	289	4	0.747262	0.922685	-0.175423	-9.05237
chr15	28082412	28082544	133	3	0.615624	0.828936	-0.213311	-7.39361
chr15	66746215	66746423	209	3	0.64353	0.801306	-0.157775	-6.11557
chr15	88871213	88871595	383	3	0.572707	0.675021	-0.102314	-2.20415
chr15	95750357	95750410	54	4	0.617786	0.889494	-0.271707	-11.403
chr15	95801508	95801739	232	5	0.71619	0.92264	-0.20645	-12.8092
chr15	95904497	95904899	403	4	0.620343	0.845037	-0.224694	-10.5985
chr16	23144408	23144708	301	3	0.283587	0.107465	0.176122	6.53208
chr16	27917190	27917261	72	3	0.882476	0.527142	0.355335	10.8628
chr16	36469442	36469498	57	4	0.318937	0.116202	0.202735	9.83425
chr16	93350673	93350984	312	4	0.447023	0.68834	-0.241317	-9.80808
chr17	5208344	5208412	69	3	0.528219	0.274171	0.254048	7.38344
chr17	48598530	48598632	103	3	0.278309	0.0837246	0.194584	6.85177
chr17	80504514	80504579	66	4	0.705545	0.884326	-0.178782	-8.5276
chr18	12655775	12655897	123	3	0.267755	0.520223	-0.252468	-7.83519
chr18	12670374	12670651	278	3	0.475997	0.677293	-0.201297	-6.61156
chr18	54125792	54125850	59	5	0.668522	0.873565	-0.205043	-13.0566
chr19	23280762	23288973	8211	13	0.641989	0.912268	-0.270278	-48.5588
chr19	23308288	23308417	130	3	0.595001	0.888464	-0.293463	-10.9382
chr19	33099422	33099649	228	3	0.539195	0.765485	-0.22629	-7.60685
chr19	46098815	46099720	906	3	0.435396	0.641159	-0.205762	-5.83005

## Sheet: D- vs D+ DMCs
chr	position	D- methylation	D+ methylation	methylation difference	diff.se	stat	p-value
chr1	155622672-155622673	0.141725	0.845683	-0.703958	0.0945467	-7.44561	9.64973e-14
chr1	122404927-122404928	0.0937082	0.639353	-0.545644	0.0855115	-6.38095	1.75991e-10
chr1	155524953-155524954	0.455938	0.985395	-0.529457	0.0863458	-6.13182	8.68796e-10
chr1	155564390-155564391	0.534319	0.953014	-0.418694	0.0741922	-5.64337	1.66754e-08
chr1	97648098-97648099	0.508037	0.945244	-0.437208	0.0808898	-5.40498	6.48152e-08
chr1	73685326-73685327	0.679008	0.233639	0.445369	0.0895708	4.97226	6.61781e-07
chr1	72166237-72166238	0.427677	0.860208	-0.432531	0.0889375	-4.86332	1.15435e-06
chr1	155662522-155662523	0.506754	0.929382	-0.422628	0.0940425	-4.49402	6.98926e-06
chr1	155603879-155603880	0.294336	0.723492	-0.429156	0.0989485	-4.33717	1.44329e-05
chr1	59789336-59789337	0.479105	0.872353	-0.393247	0.0899008	-4.37424	1.21856e-05
chr1	42599666-42599667	0.837709	0.357698	0.480011	0.11848	4.05142	5.0907e-05
chr1	155076024-155076025	0.324859	0.758212	-0.433353	0.108997	-3.97581	7.01392e-05
chr1	4878060-4878061	0.503169	0.853495	-0.350326	0.0825302	-4.24482	2.18767e-05
chr1	153283977-153283978	0.484116	0.84643	-0.362314	0.0879243	-4.12074	3.77653e-05
chr1	60335361-60335362	0.431602	0.857632	-0.426031	0.111149	-3.83298	0.000126599
chr1	59948028-59948029	0.487475	0.886003	-0.398528	0.105564	-3.77522	0.000159865
chr1	153720511-153720512	0.482236	0.856686	-0.37445	0.10003	-3.74337	0.00018157
chr1	66622490-66622491	0.60072	0.960272	-0.359553	0.0956573	-3.75876	0.00017076
chr1	71267795-71267796	0.438644	0.812893	-0.374248	0.106481	-3.51469	0.00044026
chr1	155236502-155236503	0.619738	0.940678	-0.32094	0.0861742	-3.72432	0.000195846
chr1	60018175-60018176	0.433155	0.813085	-0.37993	0.109631	-3.46554	0.000529171
chr1	59837898-59837899	0.465209	0.811229	-0.346019	0.0973212	-3.55543	0.000377357
chr1	153638817-153638818	0.493675	0.829129	-0.335454	0.0942778	-3.55815	0.000373477
chr1	35441049-35441050	0.093207	0.416223	-0.323016	0.0902607	-3.5787	0.000345306
chr1	60503945-60503946	0.550296	0.85321	-0.302914	0.0821509	-3.68729	0.000226657
chr1	97523375-97523376	0.599032	0.939352	-0.34032	0.0977574	-3.48127	0.000499046
chr1	92477508-92477509	0.440901	0.122582	0.318319	0.0907034	3.50945	0.00044903
chr1	190121933-190121934	0.432141	0.771711	-0.33957	0.099848	-3.40087	0.000671721
chr1	80685199-80685200	0.670064	0.955342	-0.285279	0.0772516	-3.69285	0.000221755
chr1	34855487-34855488	0.236094	0.57101	-0.334917	0.0987512	-3.39152	0.000695065
chr1	189477604-189477605	0.396769	0.714905	-0.318136	0.0920192	-3.45728	0.000545654
chr1	69438083-69438084	0.438397	0.761782	-0.323384	0.0942501	-3.43113	0.000601073
chr1	56988699-56988700	0.811409	0.502988	0.308421	0.0893361	3.45237	0.000555678
chr1	191636910-191636911	0.926313	0.496581	0.429732	0.142134	3.02343	0.00249928
chr1	133523548-133523549	0.62651	0.936299	-0.309789	0.0914384	-3.38795	0.000704164
chr1	59845648-59845649	0.522999	0.860484	-0.337485	0.103579	-3.25823	0.0011211
chr1	165299538-165299539	0.181656	0.513078	-0.331422	0.101222	-3.27422	0.00105955
chr1	60089244-60089245	0.471177	0.814574	-0.343397	0.106524	-3.22367	0.00126557
chr1	178953264-178953265	0.620311	0.935495	-0.315185	0.0945817	-3.33241	0.000860978
chr1	59635069-59635070	0.538935	0.865841	-0.326906	0.0998296	-3.27464	0.00105797
chr1	155536922-155536923	0.42112	0.744625	-0.323505	0.0992787	-3.25855	0.00111982
chr1	75123054-75123055	0.671514	0.947768	-0.276253	0.0783962	-3.52381	0.00042539
chr1	97615553-97615554	0.938227	0.65714	0.281087	0.0806381	3.48578	0.000490706
chr1	167393326-167393327	0.30113	0.0152331	0.285897	0.0830503	3.44245	0.000576474
chr1	4878155-4878156	0.206478	0.514059	-0.307581	0.0941444	-3.26712	0.00108648
chr1	191029594-191029595	0.74144	0.407563	0.333877	0.106484	3.13548	0.00171572
chr1	52369927-52369928	0.738281	0.362188	0.376093	0.125831	2.98886	0.00280016
chr1	152585092-152585093	0.525365	0.817468	-0.292103	0.0882461	-3.3101	0.000932634
chr1	153638723-153638724	0.375399	0.701283	-0.325884	0.103932	-3.13555	0.00171529
chr1	72166245-72166246	0.678616	0.945401	-0.266785	0.0770235	-3.46368	0.000532838
chr1	31011609-31011610	0.278114	0.576482	-0.298369	0.0916874	-3.2542	0.00113714
chr1	176668511-176668512	0.506635	0.795992	-0.289357	0.0875983	-3.30323	0.000955784
chr1	178954394-178954395	0.423853	0.734092	-0.310239	0.0976389	-3.17741	0.00148595
chr1	60751058-60751059	0.481449	0.790378	-0.308929	0.0972185	-3.17768	0.00148459
chr1	72166088-72166089	0.534318	0.83512	-0.300803	0.0936913	-3.21057	0.00132472
chr1	151547929-151547930	0.561771	0.850059	-0.288288	0.0879285	-3.27866	0.001043
chr1	5072195-5072196	0.599552	0.909421	-0.30987	0.0980188	-3.16133	0.00157051
chr1	14419596-14419597	0.85694	0.569755	0.287185	0.087588	3.27882	0.00104242
chr1	155343042-155343043	0.525332	0.185661	0.33967	0.112796	3.01137	0.0026007
chr1	188972992-188972993	0.61049	0.883683	-0.273193	0.0819956	-3.33181	0.000862838
chr1	182584478-182584479	0.428582	0.740033	-0.311451	0.100256	-3.10655	0.00189283
chr1	83653170-83653171	0.540362	0.246608	0.293754	0.0919125	3.19602	0.00139337
chr1	155596809-155596810	0.857941	0.503718	0.354223	0.12103	2.92674	0.00342538
chr1	39715269-39715270	0.806195	0.498682	0.307513	0.0990358	3.10507	0.00190237
chr1	60756111-60756112	0.34755	0.653431	-0.305881	0.099497	-3.07427	0.00211017
chr1	75425336-75425337	0.845302	0.531829	0.313472	0.103234	3.03651	0.00239336
chr1	72840525-72840526	0.442724	0.742516	-0.299791	0.0966958	-3.10036	0.00193288
chr1	90286223-90286224	0.566338	0.856862	-0.290524	0.092264	-3.14884	0.00163921
chr1	137231853-137231854	0.949642	0.615792	0.33385	0.113322	2.94603	0.00321886
chr1	187761751-187761752	0.45834	0.788729	-0.33039	0.111907	-2.95236	0.00315352
chr1	151403427-151403428	0.987715	0.661664	0.326051	0.110679	2.94591	0.00322002
chr1	180777428-180777429	0.720094	0.390558	0.329536	0.112645	2.92544	0.00343966
chr1	60417130-60417131	0.444795	0.772785	-0.327991	0.112884	-2.90556	0.00366597
chr1	162840227-162840228	0.30082	0.586632	-0.285812	0.0919946	-3.10684	0.00189099
chr1	53620571-53620572	0.731247	0.442924	0.288323	0.0936312	3.07935	0.00207455
chr1	73046171-73046172	0.527222	0.224957	0.302265	0.100832	2.99772	0.0027201
chr1	39761978-39761979	0.541314	0.245189	0.296124	0.0982232	3.01481	0.0025714
chr1	152543933-152543934	0.487245	0.775989	-0.288744	0.0945286	-3.05457	0.00225385
chr1	178568077-178568078	0.796813	0.500046	0.296767	0.0985709	3.0107	0.0026065
chr1	128765741-128765742	0.872916	0.57315	0.299766	0.10016	2.99286	0.00276379
chr1	152445236-152445237	0.0965894	0.377227	-0.280638	0.0917136	-3.05994	0.00221384
chr1	38735783-38735784	0.68151	0.942916	-0.261406	0.0819859	-3.18843	0.0014305
chr1	75625762-75625763	0.815603	0.442238	0.373365	0.139892	2.66895	0.00760877
chr1	79868571-79868572	0.594153	0.858386	-0.264233	0.0848032	-3.11583	0.00183427
chr1	61358302-61358303	0.468111	0.799726	-0.331615	0.120241	-2.75792	0.00581701
chr1	185153693-185153694	0.887516	0.60757	0.279946	0.0934022	2.99721	0.0027246
chr1	52361054-52361055	0.936342	0.520019	0.416323	0.165554	2.51473	0.0119124
chr1	152418136-152418137	0.431848	0.724797	-0.292949	0.10032	-2.92015	0.00349858
chr1	114996196-114996197	0.41728	0.699741	-0.282461	0.095003	-2.97317	0.00294738
chr1	135728947-135728948	0.390771	0.0933238	0.297447	0.102863	2.89169	0.00383174
chr1	73127652-73127653	0.614063	0.876681	-0.262618	0.0847824	-3.09755	0.00195126
chr1	161141395-161141396	0.765216	0.986764	-0.221548	0.0634464	-3.49189	0.000479624
chr1	73680990-73680991	0.515094	0.816882	-0.301789	0.105412	-2.86295	0.00419716
chr1	78598483-78598484	0.638858	0.902519	-0.263661	0.0857974	-3.07306	0.00211876
chr1	111462708-111462709	0.996868	0.756221	0.240647	0.074026	3.25085	0.0011506
chr1	67223896-67223897	0.529742	0.804623	-0.274882	0.092288	-2.97852	0.00289645
chr1	69598182-69598183	0.863658	0.588404	0.275254	0.0925013	2.97568	0.00292339
chr1	58623091-58623092	0.828679	0.560157	0.268521	0.0893538	3.00515	0.00265453
chr1	30193840-30193841	0.877236	0.600837	0.276399	0.0937801	2.94731	0.00320553
chr1	69625559-69625560	0.985597	0.722739	0.262858	0.0865914	3.03562	0.00240043
chr1	105322738-105322739	0.668874	0.916069	-0.247194	0.0784807	-3.14975	0.00163412
chr1	165443929-165443930	0.376814	0.655857	-0.279043	0.0960815	-2.90424	0.00368151
chr1	136854531-136854532	0.512596	0.78937	-0.276774	0.0952677	-2.90522	0.00366992
chr1	151062305-151062306	0.462275	0.191227	0.271048	0.0922231	2.93905	0.00329222
chr1	40359521-40359522	0.239555	0.508827	-0.269272	0.0913307	-2.94832	0.00319509
chr1	58207509-58207510	0.980796	0.746228	0.234568	0.0726656	3.22805	0.00124638
chr1	41263206-41263207	0.589674	0.31787	0.271805	0.0931466	2.91803	0.00352249
chr1	47057313-47057314	0.558494	0.823916	-0.265421	0.0897965	-2.95581	0.00311851
chr1	152267431-152267432	0.683231	0.935861	-0.252631	0.082957	-3.04532	0.0023243
chr1	32412819-32412820	0.825557	0.537154	0.288403	0.102727	2.80748	0.00499312
chr1	21124897-21124898	0.599126	0.304128	0.294998	0.106346	2.77396	0.00553791
chr1	87258990-87258991	0.961928	0.720722	0.241206	0.0769746	3.13358	0.0017269
chr1	53106978-53106979	0.954976	0.55599	0.398986	0.165619	2.40905	0.0159939
chr1	69727143-69727144	0.908002	0.653748	0.254254	0.0847038	3.00168	0.0026849
chr1	194471682-194471683	0.32257	0.593612	-0.271042	0.0940009	-2.88339	0.00393416
chr1	67191423-67191424	0.193779	0.457602	-0.263823	0.090217	-2.92432	0.00345213
chr1	120964326-120964327	0.571245	0.280347	0.290898	0.105337	2.7616	0.00575197
chr1	155229844-155229845	0.761063	0.474591	0.286473	0.103479	2.76841	0.00563303
chr1	38400264-38400265	0.65882	0.909828	-0.251008	0.0840901	-2.98499	0.00283589
chr1	138130502-138130503	0.837362	0.580898	0.256464	0.0873942	2.93457	0.00334009
chr1	13188687-13188688	0.201477	0.467229	-0.265752	0.0928552	-2.862	0.00420971
chr1	75586942-75586943	0.833437	0.491288	0.342149	0.13622	2.51175	0.0120135
chr1	155402134-155402135	0.457889	0.761814	-0.303924	0.114574	-2.65266	0.00798612
chr1	82850218-82850219	0.181752	0.457961	-0.276209	0.0989522	-2.79134	0.00524908
chr1	56540448-56540449	0.477555	0.741002	-0.263447	0.0918117	-2.86943	0.00411216
chr1	39133448-39133449	0.526679	0.797903	-0.271223	0.0962572	-2.81769	0.004837
chr1	152558485-152558486	0.675418	0.917733	-0.242315	0.0800818	-3.02585	0.00247938
chr1	189528214-189528215	0.409106	0.67106	-0.261954	0.0911949	-2.87246	0.00407284
chr1	161377652-161377653	0.967628	0.754796	0.212831	0.0635661	3.34819	0.000813425
chr1	138832145-138832146	0.578661	0.300342	0.27832	0.100542	2.76819	0.00563688
chr1	152681319-152681320	0.872969	0.621979	0.25099	0.0852032	2.94578	0.00322137
chr1	72237420-72237421	0.440527	0.155686	0.284842	0.104471	2.72652	0.00640054
chr1	165328988-165328989	0.552701	0.810512	-0.257811	0.0891818	-2.89085	0.003842
chr1	155183122-155183123	0.710522	0.935801	-0.225279	0.0708234	-3.18086	0.00146841
chr1	86817367-86817368	0.668039	0.92653	-0.258491	0.0897076	-2.88149	0.00395805
chr1	142678680-142678681	0.875963	0.637411	0.238552	0.078804	3.02716	0.00246864
chr1	57776032-57776033	0.644053	0.384635	0.259418	0.0917551	2.82729	0.00469443
chr1	120236737-120236738	0.996534	0.762014	0.23452	0.0775888	3.0226	0.00250615
chr1	75414191-75414192	0.915102	0.655611	0.259491	0.0921534	2.81585	0.00486477
chr1	155439642-155439643	0.723329	0.449334	0.273995	0.100737	2.71989	0.00653036
chr1	132720431-132720432	0.744981	0.962899	-0.217917	0.0682909	-3.19102	0.00141772
chr1	155343219-155343220	0.947237	0.725469	0.221769	0.0706191	3.14035	0.00168748
chr1	190018670-190018671	0.766957	0.480898	0.286058	0.108279	2.64186	0.00824515
chr1	93713779-93713780	0.646013	0.901289	-0.255277	0.0904955	-2.82088	0.00478923
chr1	105492329-105492330	0.763802	0.973233	-0.209432	0.0637878	-3.28326	0.00102614
chr1	54624461-54624462	0.398474	0.662348	-0.263873	0.0958341	-2.75344	0.00589732
chr1	91798265-91798266	0.681253	0.40615	0.275102	0.102599	2.68133	0.00733303
chr1	190239657-190239658	0.265206	0.542567	-0.277361	0.104238	-2.66084	0.00779468
chr1	78347220-78347221	0.804926	0.529195	0.275731	0.103704	2.65884	0.0078411
chr1	21500516-21500517	0.506946	0.23647	0.270476	0.100814	2.68291	0.00729852
chr1	60169565-60169566	0.949715	0.720574	0.229141	0.0764988	2.99536	0.00274123
chr1	84719433-84719434	0.893048	0.657733	0.235315	0.0803053	2.93025	0.00338688
chr1	136796821-136796822	0.43774	0.726284	-0.288544	0.112153	-2.57278	0.0100885
chr1	6108319-6108320	0.978926	0.751478	0.227448	0.0757769	3.00155	0.00268605
chr1	39558671-39558672	0.955159	0.706954	0.248205	0.0882404	2.81283	0.00491077
chr1	60079973-60079974	0.501928	0.791494	-0.289566	0.113053	-2.56134	0.010427
chr1	73097519-73097520	0.938136	0.700669	0.237468	0.0821926	2.88916	0.00386272
chr1	139011141-139011142	0.556173	0.801776	-0.245603	0.0870777	-2.8205	0.00479482
chr1	153006336-153006337	0.368517	0.125925	0.242592	0.0852846	2.8445	0.00444808
chr1	89228501-89228502	0.926702	0.674467	0.252235	0.0910661	2.7698	0.00560903
chr1	120781543-120781544	0.96023	0.731149	0.229081	0.0772485	2.96551	0.00302183
chr1	139863639-139863640	0.225546	0.498419	-0.272873	0.103602	-2.63387	0.00844171
chr1	192475697-192475698	0.718574	0.463136	0.255438	0.0931408	2.7425	0.00609736
chr1	135002309-135002310	0.512883	0.781609	-0.268727	0.101149	-2.65674	0.00789007
chr1	6870751-6870752	0.383543	0.116718	0.266824	0.100146	2.66435	0.00771374
chr1	81438958-81438959	0.441502	0.200793	0.24071	0.0845645	2.84646	0.00442079
chr1	36984525-36984526	0.768317	0.480073	0.288244	0.113472	2.54022	0.0110784
chr1	167409906-167409907	0.377519	0.651974	-0.274454	0.105132	-2.61058	0.00903889
chr1	179334874-179334875	0.923564	0.684371	0.239193	0.0838627	2.8522	0.00434171
chr1	171039600-171039601	0.968695	0.742142	0.226553	0.0762956	2.96941	0.00298376
chr1	193318269-193318270	0.448803	0.717003	-0.268201	0.101665	-2.63807	0.00833788
chr1	82763910-82763911	0.666635	0.917614	-0.250979	0.0912448	-2.75062	0.00594835
chr1	153697467-153697468	0.32692	0.614627	-0.287707	0.113682	-2.5308	0.0113804
chr1	155512829-155512830	0.705729	0.954622	-0.248892	0.0900665	-2.76343	0.00571975
chr1	159418857-159418858	0.662737	0.893733	-0.230996	0.0792333	-2.9154	0.00355238
chr1	163921308-163921309	0.535258	0.277445	0.257813	0.0957578	2.69235	0.00709512
chr1	184394450-184394451	0.913357	0.669408	0.243948	0.0874694	2.78896	0.00528784
chr1	74894900-74894901	0.713995	0.42193	0.292065	0.117002	2.49624	0.0125518
chr2	106786642-106786643	0.181575	0.801746	-0.620171	0.0832973	-7.44527	9.67457e-14
chr2	84810901-84810902	0.832031	0.206987	0.625044	0.085207	7.33559	2.20742e-13
chr2	106752453-106752454	0.244467	0.903973	-0.659506	0.097207	-6.78455	1.16448e-11
chr2	106830055-106830056	0.290856	0.896476	-0.605621	0.0921976	-6.56872	5.07485e-11
chr2	84811026-84811027	0.836401	0.209058	0.627342	0.097388	6.44168	1.18157e-10
chr2	114333523-114333524	0.470289	0.952913	-0.482624	0.075414	-6.39966	1.55719e-10
chr2	106734771-106734772	0.240265	0.815473	-0.575208	0.102716	-5.59998	2.14382e-08
chr2	170260305-170260306	0.299949	0.808722	-0.508772	0.0895005	-5.68457	1.31139e-08
chr2	84409108-84409109	0.820853	0.367869	0.452984	0.0796885	5.68444	1.31245e-08
chr2	115996138-115996139	0.382656	0.844285	-0.461629	0.0843396	-5.47346	4.41334e-08
chr2	84811040-84811041	0.735393	0.203545	0.531848	0.104521	5.08841	3.61074e-07
chr2	84811022-84811023	0.735095	0.207587	0.527508	0.105582	4.99619	5.84736e-07
chr2	110487557-110487558	0.100616	0.568561	-0.467945	0.0937725	-4.99021	6.03124e-07
chr2	110270498-110270499	0.127474	0.600899	-0.473425	0.0964073	-4.91068	9.0763e-07
chr2	115995964-115995965	0.414641	0.829225	-0.414584	0.0835537	-4.96188	6.98132e-07
chr2	115996153-115996154	0.34288	0.769837	-0.426957	0.088022	-4.85057	1.23105e-06
chr2	110612260-110612261	0.175714	0.682027	-0.506313	0.114878	-4.4074	1.04617e-05
chr2	110612259-110612260	0.175714	0.710406	-0.534692	0.127791	-4.18411	2.86288e-05
chr2	111171855-111171856	0.167295	0.631221	-0.463926	0.10842	-4.27897	1.87758e-05
chr2	106647899-106647900	0.212548	0.642797	-0.430249	0.0998887	-4.30728	1.65274e-05
chr2	72182554-72182555	0.342376	0.766126	-0.423749	0.0986266	-4.2965	1.73515e-05
chr2	110612258-110612259	0.166744	0.712742	-0.545998	0.137888	-3.95972	7.50385e-05
chr2	112861885-112861886	0.984489	0.539258	0.445231	0.107461	4.14319	3.42507e-05
chr2	91424615-91424616	0.0392175	0.521579	-0.482362	0.120327	-4.00877	6.10351e-05
chr2	84810916-84810917	0.626358	0.211366	0.414992	0.102889	4.03341	5.4974e-05
chr2	92238444-92238445	0.904326	0.54164	0.362686	0.0864248	4.19655	2.71011e-05
chr2	84811070-84811071	0.638839	0.216194	0.422645	0.106603	3.96465	7.35028e-05
chr2	92924775-92924776	0.236306	0.755473	-0.519167	0.139537	-3.72065	0.000198714
chr2	106601741-106601742	0.2155	0.68252	-0.46702	0.125141	-3.73194	0.00019001
chr2	110257835-110257836	0.193221	0.673998	-0.480777	0.130955	-3.67131	0.000241313
chr2	115995981-115995982	0.429123	0.788376	-0.359253	0.0899037	-3.99598	6.44279e-05
chr2	157840145-157840146	0.402043	0.776692	-0.374648	0.0960351	-3.90116	9.57332e-05
chr2	86420193-86420194	0.0156061	0.460156	-0.444549	0.12575	-3.53518	0.000407501
chr2	84394965-84394966	0.278889	0.66743	-0.388541	0.105388	-3.68675	0.000227133
chr2	92425566-92425567	0.202977	0.624585	-0.421608	0.11892	-3.54531	0.000392153
chr2	53110718-53110719	0.974874	0.59609	0.378784	0.105928	3.57587	0.000349059
chr2	143269262-143269263	0.725874	0.336302	0.389573	0.11085	3.5144	0.000440753
chr2	53692665-53692666	0.27306	0.63773	-0.36467	0.103396	-3.52693	0.000420401
chr2	112490774-112490775	0.233029	0.662569	-0.429539	0.130355	-3.29514	0.000983711
chr2	147287787-147287788	0.689354	0.34461	0.344744	0.097855	3.52301	0.000426671
chr2	93824604-93824605	0.66229	0.313012	0.349278	0.101434	3.44339	0.000574462
chr2	72175586-72175587	0.521054	0.83877	-0.317716	0.089825	-3.53706	0.000404612
chr2	130370179-130370180	0.916968	0.602504	0.314464	0.0884966	3.5534	0.000380288
chr2	59341103-59341104	0.50513	0.876168	-0.371038	0.112876	-3.28714	0.0010121
chr2	93836051-93836052	0.977227	0.687256	0.289971	0.0791547	3.66334	0.000248945
chr2	166261465-166261466	0.877296	0.5545	0.322796	0.0928581	3.47623	0.000508522
chr2	84113649-84113650	0.778117	0.466904	0.311213	0.0892769	3.48593	0.000490428
chr2	53991426-53991427	0.90484	0.498069	0.406771	0.130364	3.12027	0.00180687
chr2	84811329-84811330	0.835368	0.487053	0.348315	0.106441	3.27237	0.0010665
chr2	75248853-75248854	0.916263	0.603764	0.3125	0.0912075	3.42625	0.000611983
chr2	86687946-86687947	0.192706	0.579971	-0.387265	0.125066	-3.09649	0.00195826
chr2	35989866-35989867	0.51518	0.82358	-0.3084	0.0914239	-3.3733	0.00074274
chr2	70258019-70258020	0.785971	0.44993	0.336042	0.103661	3.24173	0.00118808
chr2	19124268-19124269	0.675022	0.942897	-0.267875	0.0751316	-3.56541	0.000363284
chr2	110673019-110673020	0.201017	0.597198	-0.396181	0.13282	-2.98284	0.00285587
chr2	171323086-171323087	0.366313	0.718336	-0.352023	0.113252	-3.10831	0.00188159
chr2	77157794-77157795	0.28095	0.574114	-0.293164	0.087208	-3.36167	0.000774726
chr2	51321815-51321816	0.883163	0.580825	0.302338	0.0916018	3.30056	0.000964909
chr2	5000244-5000245	0.667356	0.935901	-0.268545	0.076329	-3.51825	0.000434396
chr2	35762310-35762311	0.584495	0.895213	-0.310718	0.0956138	-3.24972	0.00115519
chr2	149625931-149625932	0.0304797	0.293782	-0.263302	0.0742578	-3.54579	0.000391443
chr2	3889761-3889762	0.545733	0.836497	-0.290765	0.0880967	-3.30052	0.000965071
chr2	53625576-53625577	0.806601	0.396328	0.410273	0.143665	2.85575	0.00429351
chr2	33361168-33361169	0.751808	0.430707	0.321101	0.102239	3.14069	0.00168552
chr2	115068964-115068965	0.559754	0.853905	-0.294152	0.090025	-3.26745	0.00108522
chr2	93929054-93929055	0.688985	0.368055	0.32093	0.102978	3.11649	0.00183016
chr2	62388938-62388939	0.925723	0.660576	0.265147	0.0771193	3.43814	0.000585724
chr2	11266520-11266521	0.958423	0.69465	0.263773	0.0770144	3.42498	0.000614836
chr2	166620783-166620784	0.707316	0.393151	0.314165	0.101077	3.10817	0.00188249
chr2	43966246-43966247	0.909177	0.644832	0.264345	0.0775895	3.40697	0.000656882
chr2	126928469-126928470	0.537873	0.840881	-0.303007	0.0960413	-3.15497	0.00160515
chr2	65257249-65257250	0.750422	0.985857	-0.235434	0.0647288	-3.63724	0.000275576
chr2	89841693-89841694	0.627785	0.305818	0.321967	0.106254	3.03017	0.00244414
chr2	131066295-131066296	0.716419	0.379592	0.336827	0.113528	2.9669	0.0030082
chr2	131739885-131739886	0.92257	0.638485	0.284085	0.0882623	3.21865	0.00128797
chr2	148720218-148720219	0.981687	0.669702	0.311985	0.102334	3.04869	0.00229843
chr2	127439833-127439834	0.806975	0.501523	0.305453	0.0992451	3.07776	0.00208564
chr2	104035917-104035918	0.348988	0.0926687	0.256319	0.0758238	3.38046	0.000723649
chr2	32252972-32252973	0.905443	0.601314	0.304129	0.0994418	3.05836	0.00222553
chr2	78412142-78412143	0.624037	0.902001	-0.277964	0.0872139	-3.18715	0.00143681
chr2	10455861-10455862	0.983685	0.745142	0.238543	0.0681103	3.50231	0.000461238
chr2	149934394-149934395	0.731051	0.426218	0.304833	0.100779	3.02477	0.00248824
chr2	83651464-83651465	0.413508	0.703285	-0.289777	0.0933808	-3.10317	0.00191457
chr2	86974635-86974636	0.742647	0.448116	0.294531	0.0965534	3.05044	0.00228506
chr2	84966707-84966708	0.400003	0.714425	-0.314422	0.106492	-2.95255	0.0031516
chr2	92813341-92813342	0.358504	0.088456	0.270048	0.0844183	3.19892	0.00137942
chr2	77362831-77362832	0.0175149	0.387631	-0.370116	0.134905	-2.74354	0.00607809
chr2	126849932-126849933	0.267162	0.54265	-0.275488	0.0876031	-3.14472	0.00166243
chr2	51296589-51296590	0.202265	0.478856	-0.276591	0.0886913	-3.11858	0.00181725
chr2	43057557-43057558	0.285567	0.578417	-0.29285	0.0970751	-3.01673	0.00255514
chr2	64864315-64864316	0.916729	0.667082	0.249647	0.0754982	3.30666	0.000944143
chr2	163941727-163941728	0.995055	0.713846	0.281209	0.0915365	3.0721	0.00212558
chr2	42940711-42940712	0.448018	0.731054	-0.283035	0.0925813	-3.05715	0.00223451
chr2	105224997-105224998	0.785176	0.495827	0.289349	0.096557	2.99667	0.00272948
chr2	86317702-86317703	0.802873	0.480251	0.322622	0.113683	2.83792	0.00454083
chr2	26314506-26314507	0.996671	0.76427	0.232401	0.0676402	3.43584	0.000590727
chr2	53061082-53061083	0.989519	0.65769	0.331829	0.118859	2.79177	0.00524202
chr2	58564465-58564466	0.156605	0.440352	-0.283748	0.0943169	-3.00845	0.00262586
chr2	127360777-127360778	0.711577	0.40058	0.310997	0.108403	2.86889	0.00411909
chr2	72221702-72221703	0.366465	0.658519	-0.292054	0.0988957	-2.95316	0.00314544
chr2	110390693-110390694	0.235644	0.607119	-0.371475	0.140236	-2.64893	0.00807476
chr2	75036372-75036373	0.876037	0.549722	0.326315	0.11758	2.77525	0.00551596
chr2	69160197-69160198	0.628217	0.889621	-0.261404	0.0838526	-3.11742	0.0018244
chr2	4920602-4920603	0.366291	0.64438	-0.278089	0.0935819	-2.97161	0.00296241
chr2	157875126-157875127	0.808152	0.53231	0.275843	0.0925754	2.97965	0.00288575
chr2	103044223-103044224	0.227573	0.495485	-0.267912	0.0887157	-3.01989	0.00252864
chr2	70069122-70069123	0.721604	0.963145	-0.241541	0.0748443	-3.22725	0.00124987
chr2	146962107-146962108	0.321228	0.622871	-0.301643	0.107139	-2.81543	0.00487122
chr2	155069001-155069002	0.646083	0.915019	-0.268936	0.0898819	-2.9921	0.00277063
chr2	120644077-120644078	0.940055	0.679783	0.260272	0.0854318	3.04655	0.00231486
chr2	31322121-31322122	0.739405	0.977138	-0.237733	0.0736868	-3.22626	0.0012542
chr2	105312266-105312267	0.252021	0.545309	-0.293289	0.103481	-2.83422	0.0045938
chr2	179667918-179667919	0.590695	0.855987	-0.265292	0.0886119	-2.99386	0.00275472
chr2	145788034-145788035	0.314531	0.630799	-0.316269	0.116267	-2.72019	0.00652443
chr2	80441892-80441893	0.694028	0.425771	0.268257	0.0904563	2.96559	0.00302098
chr2	26330817-26330818	0.947426	0.703197	0.244229	0.0775353	3.14991	0.00163323
chr2	88241229-88241230	0.599469	0.874366	-0.274897	0.0943099	-2.91482	0.00355888
chr2	24385885-24385886	0.93185	0.657401	0.274449	0.0941507	2.915	0.0035569
chr2	82148791-82148792	0.596748	0.861302	-0.264554	0.0888878	-2.97627	0.00291779
chr2	28287552-28287553	0.957029	0.69149	0.265539	0.0895029	2.96682	0.003009
chr2	107159154-107159155	0.43114	0.155203	0.275937	0.0952393	2.8973	0.00376389
chr2	132545995-132545996	0.754214	0.99601	-0.241795	0.076753	-3.15031	0.001631
chr2	26668656-26668657	0.836948	0.567745	0.269203	0.0917929	2.93272	0.00336005
chr2	68345778-68345779	0.46728	0.741497	-0.274217	0.0949625	-2.88763	0.00388153
chr2	166419432-166419433	0.934196	0.664213	0.269983	0.0930538	2.90136	0.00371546
chr2	4937625-4937626	0.298378	0.599003	-0.300625	0.109928	-2.73475	0.00624284
chr2	105360589-105360590	0.287448	0.575125	-0.287677	0.102938	-2.79465	0.00519556
chr2	179249818-179249819	0.397362	0.696359	-0.298997	0.109418	-2.73262	0.00628335
chr2	35604989-35604990	0.461092	0.790389	-0.329297	0.126442	-2.60433	0.00920548
chr2	75937761-75937762	0.881261	0.606076	0.275186	0.0964163	2.85414	0.00431536
chr2	133634804-133634805	0.762152	0.49016	0.271992	0.0948169	2.8686	0.00412288
chr2	52944427-52944428	0.956204	0.681678	0.274525	0.0963724	2.84859	0.00439133
chr2	122626323-122626324	0.594979	0.872206	-0.277227	0.0981954	-2.82322	0.00475445
chr2	93823459-93823460	0.867366	0.586459	0.280907	0.100295	2.80081	0.00509751
chr2	104089707-104089708	0.10838	0.357072	-0.248693	0.0825627	-3.01217	0.00259389
chr2	168906731-168906732	0.859626	0.588319	0.271307	0.0951642	2.85094	0.00435904
chr2	126561468-126561469	0.160569	0.433015	-0.272446	0.0962268	-2.83129	0.00463605
chr2	179252197-179252198	0.408398	0.15451	0.253888	0.0860292	2.95118	0.00316558
chr2	85137128-85137129	0.941034	0.681095	0.259939	0.0896175	2.90054	0.00372523
chr2	38825582-38825583	0.509858	0.242803	0.267055	0.093629	2.85227	0.00434088
chr2	115995659-115995660	0.647302	0.893865	-0.246563	0.0822281	-2.99852	0.00271294
chr2	4083493-4083494	0.717229	0.424074	0.293155	0.108596	2.69949	0.00694464
chr2	70348053-70348054	0.948833	0.682742	0.266091	0.0934063	2.84875	0.00438914
chr2	71791023-71791024	0.817493	0.538142	0.279351	0.100955	2.7671	0.00565577
chr2	109920485-109920486	0.472403	0.73808	-0.265677	0.09337	-2.84542	0.00443531
chr2	161871352-161871353	0.406922	0.686235	-0.279313	0.101229	-2.75922	0.00579401
chr2	11051088-11051089	0.97466	0.753937	0.220722	0.0683825	3.22776	0.00124764
chr2	143243480-143243481	0.514609	0.787657	-0.273048	0.098076	-2.78405	0.00536854
chr2	17738780-17738781	0.292895	0.566988	-0.274093	0.0987062	-2.77685	0.00548879
chr2	151049048-151049049	0.921895	0.680604	0.241291	0.0800913	3.0127	0.00258933
chr2	147787234-147787235	0.245027	0.514019	-0.268991	0.0959555	-2.80329	0.00505835
chr2	133235878-133235879	0.997266	0.794459	0.202807	0.0584099	3.47213	0.000516343
chr2	146048391-146048392	0.876189	0.612762	0.263427	0.0931885	2.82682	0.00470126
chr2	146102181-146102182	0.589161	0.867469	-0.278308	0.101711	-2.73626	0.00621423
chr2	141715923-141715924	0.199324	0.470755	-0.271431	0.0977742	-2.7761	0.00550149
chr2	95233207-95233208	0.587545	0.311074	0.276471	0.100921	2.73949	0.00615351
chr2	145671344-145671345	0.639229	0.356587	0.282642	0.104477	2.7053	0.0068243
chr2	72195041-72195042	0.493352	0.758194	-0.264843	0.0942854	-2.80895	0.0049704
chr2	179395751-179395752	0.700109	0.424891	0.275219	0.100517	2.73804	0.00618061
chr2	51089630-51089631	0.785239	0.51919	0.26605	0.0952438	2.79335	0.00521648
chr2	59213306-59213307	0.513953	0.780878	-0.266924	0.0958632	-2.78443	0.00536221
chr2	24182619-24182620	0.591931	0.312291	0.27964	0.10324	2.70865	0.00675582
chr2	109884752-109884753	0.478191	0.21339	0.264801	0.0947456	2.79486	0.0051922
chr2	144400740-144400741	0.594772	0.885938	-0.291166	0.110302	-2.63972	0.0082975
chr2	72194807-72194808	0.698664	0.923724	-0.225059	0.0720724	-3.12268	0.0017921
chr2	167380869-167380870	0.184282	0.478624	-0.294342	0.11223	-2.62268	0.00872405
chr2	174385396-174385397	0.708435	0.933989	-0.225553	0.0724713	-3.11231	0.00185628
chr2	62908579-62908580	0.524295	0.258739	0.265556	0.0957708	2.77283	0.00555717
chr2	80567549-80567550	0.608969	0.853193	-0.244223	0.0834175	-2.92772	0.00341454
chr2	148370869-148370870	0.877505	0.62831	0.249195	0.0863285	2.88658	0.00389449
chr2	107239843-107239844	0.462354	0.193353	0.269001	0.0980729	2.74287	0.00609045
chr2	4245607-4245608	0.698398	0.940786	-0.242387	0.0826259	-2.93355	0.00335107
chr2	168780801-168780802	0.614255	0.876829	-0.262574	0.0945412	-2.77735	0.00548041
chr2	35775294-35775295	0.629994	0.876949	-0.246955	0.0856412	-2.8836	0.00393158
chr2	173413990-173413991	0.973932	0.747718	0.226215	0.0739651	3.0584	0.00222524
chr2	154223866-154223867	0.641487	0.367271	0.274216	0.102286	2.68087	0.00734317
chr2	4944805-4944806	0.468619	0.761742	-0.293124	0.113513	-2.5823	0.00981445
chr2	167229114-167229115	0.503116	0.819547	-0.316431	0.127976	-2.47259	0.0134138
chr2	165408205-165408206	0.0340821	0.270528	-0.236446	0.0804104	-2.94048	0.003277
chr2	148835296-148835297	0.233265	0.508206	-0.274941	0.103214	-2.66379	0.00772654
chr2	86349870-86349871	0.00984067	0.227758	-0.217917	0.0695265	-3.13431	0.0017226
chr2	147492068-147492069	0.799068	0.54785	0.251217	0.0894708	2.80781	0.00498789
chr2	5455534-5455535	0.953046	0.733692	0.219354	0.0707863	3.09882	0.00194294
chr2	129310235-129310236	0.672834	0.918166	-0.245332	0.0862161	-2.84555	0.0044335
chr2	118711412-118711413	0.286656	0.0382796	0.248376	0.0880482	2.82091	0.00478877
chr2	53069295-53069296	0.985523	0.725141	0.260382	0.0954562	2.72776	0.00637656
chr2	165005974-165005975	0.59713	0.858548	-0.261418	0.0961272	-2.71951	0.00653796
chr2	162893140-162893141	0.928657	0.662441	0.266215	0.0990716	2.6871	0.00720752
chr2	28959916-28959917	0.923796	0.678197	0.245599	0.0868159	2.82896	0.00466995
chr2	60037539-60037540	0.0530263	0.291733	-0.238707	0.0828883	-2.87987	0.00397844
chr2	35771832-35771833	0.565167	0.821608	-0.256442	0.0935488	-2.74126	0.00612039
chr2	174914192-174914193	0.911082	0.679024	0.232058	0.079202	2.92995	0.00339017
chr2	129578670-129578671	0.897019	0.649527	0.247492	0.0886002	2.79336	0.00521634
chr2	166861940-166861941	0.717178	0.948493	-0.231315	0.0789603	-2.92951	0.00339496
chr2	105360462-105360463	0.310134	0.582589	-0.272455	0.104389	-2.60999	0.00905456
chr2	145160870-145160871	0.571753	0.829654	-0.257901	0.0955849	-2.69814	0.00697282
chr2	83653131-83653132	0.492648	0.753458	-0.26081	0.0974327	-2.67682	0.00743238
chr2	68884298-68884299	0.443174	0.690091	-0.246917	0.0890549	-2.77263	0.00556047
chr2	144456609-144456610	0.483031	0.21286	0.27017	0.103277	2.61597	0.00889739
chr2	145040588-145040589	0.968101	0.754486	0.213615	0.0689608	3.09763	0.00195073
chr2	11100212-11100213	0.322773	0.617365	-0.294592	0.118596	-2.48399	0.0129919
chr3	121492969-121492970	0.997136	0.449103	0.548033	0.0788558	6.94981	3.65771e-12
chr3	67525708-67525709	0.845466	0.285931	0.559535	0.112178	4.98791	6.10348e-07
chr3	14800096-14800097	0.213823	0.64839	-0.434566	0.0881242	-4.93129	8.16871e-07
chr3	94683856-94683857	0.432628	0.85822	-0.425592	0.0914576	-4.65344	3.26445e-06
chr3	148008562-148008563	0.954814	0.561537	0.393277	0.0834822	4.71091	2.46617e-06
chr3	121538960-121538961	0.340895	0.753702	-0.412807	0.0935766	-4.41143	1.02689e-05
chr3	54980273-54980274	0.626997	0.226828	0.40017	0.0925	4.32616	1.51733e-05
chr3	86021800-86021801	0.201231	0.696652	-0.495422	0.12293	-4.03011	5.57514e-05
chr3	142748705-142748706	0.174331	0.544959	-0.370628	0.0855214	-4.33374	1.46598e-05
chr3	76585385-76585386	0.159021	0.53884	-0.379819	0.0889479	-4.27013	1.95363e-05
chr3	18229969-18229970	0.315249	0.725805	-0.410556	0.1004	-4.08921	4.3285e-05
chr3	123353661-123353662	0.48589	0.858173	-0.372283	0.0897392	-4.1485	3.34668e-05
chr3	122392029-122392030	0.697875	0.312176	0.385699	0.0949891	4.06046	4.8977e-05
chr3	59262712-59262713	0.712366	0.31461	0.397757	0.100053	3.97544	7.02487e-05
chr3	122710330-122710331	0.678031	0.259039	0.418992	0.107219	3.90783	9.31301e-05
chr3	67547141-67547142	0.726926	0.326716	0.400209	0.101541	3.94135	8.10236e-05
chr3	138376253-138376254	0.343026	0.730758	-0.387732	0.09773	-3.96738	7.26671e-05
chr3	110580909-110580910	0.20947	0.561983	-0.352513	0.0857774	-4.10962	3.96304e-05
chr3	78826468-78826469	0.462071	0.841927	-0.379856	0.0952697	-3.98717	6.68666e-05
chr3	78149675-78149676	0.260561	0.737612	-0.47705	0.13085	-3.64578	0.000266578
chr3	155803841-155803842	0.667121	0.21076	0.456361	0.126353	3.61179	0.000304088
chr3	94680701-94680702	0.50685	0.867143	-0.360294	0.0926563	-3.8885	0.000100867
chr3	146392242-146392243	0.103006	0.456042	-0.353036	0.0918133	-3.84515	0.000120477
chr3	94682481-94682482	0.548294	0.901983	-0.353689	0.0921506	-3.83816	0.000123959
chr3	75902757-75902758	0.149804	0.48348	-0.333675	0.0858381	-3.88726	0.000101381
chr3	123359487-123359488	0.637768	0.967673	-0.329906	0.0851156	-3.87597	0.0001062
chr3	59262811-59262812	0.749692	0.389111	0.360581	0.0967696	3.72618	0.000194401
chr3	145774778-145774779	0.381767	0.754487	-0.37272	0.101563	-3.66985	0.000242693
chr3	87810754-87810755	0.689221	0.299589	0.389632	0.109855	3.54677	0.000389982
chr3	148100674-148100675	0.929645	0.631741	0.297904	0.0752172	3.96058	7.4768e-05
chr3	118655049-118655050	0.484539	0.815606	-0.331067	0.089881	-3.68339	0.000230153
chr3	145774777-145774778	0.288438	0.660253	-0.371815	0.10907	-3.40897	0.000652086
chr3	94695165-94695166	0.491509	0.827203	-0.335694	0.0952128	-3.52573	0.000422324
chr3	129883099-129883100	0.532717	0.845389	-0.312672	0.0870558	-3.59163	0.000328613
chr3	67510909-67510910	0.842813	0.500183	0.34263	0.0996677	3.43772	0.000586629
chr3	59262807-59262808	0.668635	0.301711	0.366924	0.10969	3.34509	0.000822565
chr3	79677854-79677855	0.979317	0.708062	0.271255	0.0712929	3.8048	0.000141919
chr3	59262313-59262314	0.424488	0.120723	0.303765	0.0858644	3.53773	0.000403581
chr3	141874931-141874932	0.529106	0.815815	-0.286709	0.0787954	-3.63865	0.000274072
chr3	77315182-77315183	0.453678	0.778173	-0.324495	0.094894	-3.41955	0.000627244
chr3	94659566-94659567	0.54265	0.211854	0.330797	0.0993136	3.33083	0.000865876
chr3	94680473-94680474	0.478343	0.838261	-0.359918	0.111977	-3.21421	0.00130805
chr3	105496186-105496187	0.918125	0.616802	0.301323	0.0876714	3.43696	0.000588281
chr3	159490171-159490172	0.92441	0.643438	0.280972	0.0801499	3.50559	0.000455599
chr3	89630580-89630581	0.933346	0.634723	0.298623	0.0881937	3.38599	0.000709221
chr3	108497129-108497130	0.423313	0.743505	-0.320192	0.0992862	-3.22494	0.00125999
chr3	60214695-60214696	0.285908	0.585184	-0.299276	0.0908882	-3.29279	0.000991981
chr3	53453167-53453168	0.915055	0.641052	0.274003	0.0800768	3.42175	0.000622189
chr3	77836957-77836958	0.473954	0.771534	-0.297579	0.0914504	-3.254	0.00113794
chr3	94682121-94682122	0.496468	0.801595	-0.305127	0.0952474	-3.20352	0.00135756
chr3	18124073-18124074	0.586382	0.867919	-0.281537	0.0843766	-3.33667	0.000847901
chr3	131301396-131301397	0.38884	0.700357	-0.311517	0.0983391	-3.16778	0.00153606
chr3	5425056-5425057	0.383308	0.686345	-0.303037	0.0946326	-3.20225	0.0013636
chr3	153167919-153167920	0.542549	0.852799	-0.310251	0.0982473	-3.15786	0.00158934
chr3	80048879-80048880	0.720869	0.420779	0.30009	0.0937391	3.20133	0.00136794
chr3	100109384-100109385	0.910762	0.649166	0.261596	0.0763382	3.4268	0.000610735
chr3	84922464-84922465	0.206394	0.494182	-0.287788	0.0891117	-3.22953	0.00123995
chr3	112274146-112274147	0.337188	0.635423	-0.298235	0.0941318	-3.16827	0.0015335
chr3	122813341-122813342	0.425541	0.725554	-0.300012	0.0952453	-3.14989	0.0016333
chr3	78013676-78013677	0.295365	0.705233	-0.409867	0.148127	-2.76699	0.00565762
chr3	138251183-138251184	0.34106	0.655998	-0.314939	0.10257	-3.07047	0.0021372
chr3	59262795-59262796	0.712423	0.392289	0.320133	0.10506	3.04715	0.00231023
chr3	145774549-145774550	0.0422725	0.306785	-0.264513	0.0789946	-3.34849	0.000812533
chr3	78069112-78069113	0.228031	0.622479	-0.394448	0.141921	-2.77934	0.00544694
chr3	18105522-18105523	0.572021	0.851137	-0.279115	0.0864665	-3.22802	0.00124652
chr3	102159599-102159600	0.631737	0.323865	0.307872	0.100487	3.06379	0.00218553
chr3	56899380-56899381	0.822083	0.537018	0.285066	0.090452	3.15157	0.00162395
chr3	78110132-78110133	0.250197	0.653665	-0.403467	0.148904	-2.70958	0.00673689
chr3	51187315-51187316	0.246317	0.55233	-0.306013	0.100992	-3.03007	0.002445
chr3	19227137-19227138	0.180721	0.479789	-0.299068	0.0976748	-3.06188	0.00219953
chr3	21825256-21825257	0.738358	0.45818	0.280179	0.0884145	3.16892	0.00153005
chr3	97189285-97189286	0.284784	0.611665	-0.326881	0.11257	-2.9038	0.0036866
chr3	78188941-78188942	0.161239	0.50491	-0.343671	0.121102	-2.83787	0.00454151
chr3	28190455-28190456	0.733557	0.430199	0.303358	0.101166	2.99861	0.00271216
chr3	134398103-134398104	0.598487	0.865861	-0.267374	0.0836534	-3.19621	0.00139244
chr3	40878834-40878835	0.580249	0.891559	-0.31131	0.106025	-2.93619	0.00332274
chr3	67510834-67510835	0.981324	0.747018	0.234307	0.0673982	3.47645	0.000508093
chr3	89142282-89142283	0.634327	0.321221	0.313106	0.107059	2.92462	0.00344878
chr3	94719182-94719183	0.314502	0.643975	-0.329474	0.115384	-2.85546	0.00429746
chr3	112534963-112534964	0.152576	0.451049	-0.298473	0.100531	-2.96895	0.00298817
chr3	94696863-94696864	0.721984	0.97177	-0.249786	0.0761795	-3.27891	0.00104209
chr3	135503097-135503098	0.477161	0.7651	-0.287939	0.095662	-3.00996	0.00261281
chr3	78157143-78157144	0.348326	0.682261	-0.333936	0.119225	-2.80089	0.00509622
chr3	122488979-122488980	0.732325	0.981769	-0.249444	0.0764332	-3.26356	0.00110022
chr3	120731334-120731335	0.879245	0.592924	0.286321	0.0958623	2.9868	0.00281917
chr3	53658645-53658646	0.0952495	0.395769	-0.300519	0.103453	-2.90488	0.0036739
chr3	89830661-89830662	0.688723	0.39033	0.298392	0.102576	2.90897	0.00362616
chr3	70767302-70767303	0.843233	0.589174	0.254059	0.0810072	3.13625	0.00171125
chr3	147666113-147666114	0.719527	0.416237	0.303289	0.107201	2.82916	0.00466707
chr3	151470341-151470342	0.229845	0.486389	-0.256544	0.0825169	-3.10899	0.00187726
chr3	27567778-27567779	0.569232	0.833909	-0.264676	0.0878114	-3.01414	0.00257705
chr3	83379894-83379895	0.76827	0.491752	0.276518	0.0945168	2.92559	0.00343799
chr3	123163939-123163940	0.260153	0.554281	-0.294128	0.104339	-2.81897	0.00481774
chr3	119943149-119943150	0.329221	0.616605	-0.287384	0.100726	-2.85313	0.00432908
chr3	3457119-3457120	0.910815	0.655514	0.2553	0.08373	3.04909	0.00229535
chr3	87679747-87679748	0.301256	0.586116	-0.284859	0.0998408	-2.85314	0.004329
chr3	28782060-28782061	0.670915	0.382184	0.288731	0.10209	2.82822	0.00468083
chr3	19039034-19039035	0.362113	0.637161	-0.275049	0.0947726	-2.9022	0.00370557
chr3	108914629-108914630	0.791936	0.997463	-0.205527	0.05716	-3.59565	0.000323588
chr3	94682012-94682013	0.703017	0.939353	-0.236336	0.0740564	-3.1913	0.00141635
chr3	122925091-122925092	0.44129	0.166834	0.274457	0.0951683	2.88391	0.00392775
chr3	94682198-94682199	0.66453	0.917	-0.25247	0.083252	-3.0326	0.00242457
chr3	12642266-12642267	0.836724	0.575877	0.260848	0.087924	2.96674	0.00300975
chr3	79587574-79587575	0.6324	0.897847	-0.265448	0.0905516	-2.93145	0.00337381
chr3	51386680-51386681	0.945666	0.709381	0.236285	0.074763	3.16045	0.00157525
chr3	46678526-46678527	0.863791	0.621782	0.242009	0.0781558	3.09649	0.00195824
chr3	10240794-10240795	0.247331	0.506117	-0.258787	0.0874003	-2.96093	0.00306707
chr3	148100838-148100839	0.605	0.337883	0.267117	0.0920156	2.90295	0.00369662
chr3	80283836-80283837	0.456798	0.718014	-0.261216	0.0889386	-2.93704	0.00331364
chr3	46092499-46092500	0.418926	0.714499	-0.295572	0.108077	-2.73482	0.00624135
chr3	114696464-114696465	0.67093	0.90081	-0.22988	0.0717518	-3.20382	0.00135618
chr3	144966404-144966405	0.820486	0.562772	0.257714	0.0871947	2.95562	0.00312044
chr3	159683323-159683324	0.894573	0.618835	0.275738	0.0972654	2.8349	0.00458398
chr3	100473272-100473273	0.955994	0.715039	0.240955	0.0780954	3.0854	0.0020328
chr3	59744511-59744512	0.383407	0.139897	0.24351	0.0795577	3.0608	0.00220746
chr3	77810233-77810234	0.273256	0.533161	-0.259905	0.0889939	-2.92048	0.00349491
chr3	38270935-38270936	0.4355	0.168359	0.267141	0.0934787	2.85777	0.00426632
chr3	4247011-4247012	0.832192	0.576744	0.255447	0.0869863	2.93664	0.00331789
chr3	43233180-43233181	0.808584	0.560212	0.248372	0.0830682	2.98997	0.00279
chr3	116659145-116659146	0.494067	0.769449	-0.275382	0.0982604	-2.80258	0.00506963
chr3	158773983-158773984	0.921405	0.684544	0.236861	0.0768254	3.08311	0.00204851
chr3	67547962-67547963	0.997491	0.786268	0.211223	0.0625855	3.37495	0.0007383
chr3	53655530-53655531	0.876234	0.603702	0.272532	0.0971872	2.8042	0.00504418
chr3	7050614-7050615	0.732908	0.967024	-0.234116	0.0757371	-3.09117	0.00199371
chr3	67324302-67324303	0.42949	0.701491	-0.272001	0.0973078	-2.79527	0.00518572
chr3	35693744-35693745	0.947327	0.714884	0.232443	0.0749565	3.10104	0.00192843
chr3	157862161-157862162	0.515292	0.771922	-0.25663	0.0888542	-2.88822	0.00387435
chr3	45147694-45147695	0.976105	0.738804	0.237302	0.078448	3.02495	0.00248673
chr3	89606144-89606145	0.614668	0.879493	-0.264825	0.0942135	-2.8109	0.0049403
chr3	103040525-103040526	0.391565	0.662405	-0.27084	0.0978732	-2.76726	0.005653
chr3	89143264-89143265	0.931067	0.6778	0.253267	0.0879984	2.87809	0.00400092
chr3	81602939-81602940	0.922371	0.688522	0.233849	0.076844	3.04317	0.00234099
chr3	9334220-9334221	0.212602	0.487384	-0.274782	0.100586	-2.73181	0.00629884
chr3	142435283-142435284	0.852857	0.577939	0.274918	0.100688	2.73038	0.00632608
chr3	154091562-154091563	0.694435	0.933587	-0.239152	0.0802426	-2.98036	0.00287907
chr3	112298190-112298191	0.664282	0.385683	0.278599	0.103181	2.70012	0.00693155
chr3	132061345-132061346	0.914464	0.673095	0.241369	0.0816335	2.95674	0.00310911
chr3	79234220-79234221	0.305236	0.582518	-0.277282	0.103138	-2.68845	0.00717841
chr3	45972312-45972313	0.342174	0.646215	-0.304041	0.119101	-2.55279	0.0106862
chr3	102494196-102494197	0.985488	0.778448	0.207041	0.0627964	3.29702	0.000977181
chr3	59262291-59262292	0.389769	0.139072	0.250698	0.0884744	2.83356	0.00460322
chr3	142853041-142853042	0.689149	0.913487	-0.224338	0.0731287	-3.06771	0.00215703
chr3	30117523-30117524	0.64908	0.908443	-0.259363	0.0937695	-2.76597	0.00567546
chr3	130091717-130091718	0.215638	0.475364	-0.259727	0.0939914	-2.7633	0.00572194
chr3	122888782-122888783	0.722077	0.452888	0.269189	0.0999203	2.69404	0.00705916
chr3	81969580-81969581	0.476059	0.738186	-0.262127	0.0958584	-2.73453	0.00624697
chr3	129583317-129583318	0.545261	0.84478	-0.299519	0.11828	-2.5323	0.0113319
chr3	28970455-28970456	0.475799	0.735016	-0.259217	0.0942471	-2.7504	0.00595233
chr3	36722135-36722136	0.819985	0.554068	0.265918	0.0982868	2.70553	0.00681962
chr3	9340593-9340594	0.149876	0.395378	-0.245502	0.0862993	-2.84477	0.00444435
chr3	9660676-9660677	0.637678	0.885476	-0.247798	0.0879174	-2.81853	0.00482438
chr3	122487083-122487084	0.0598509	0.289808	-0.229957	0.0773038	-2.97472	0.0029326
chr3	62071596-62071597	0.782359	0.982581	-0.200222	0.0596735	-3.35529	0.00079281
chr3	84173662-84173663	0.346051	0.601797	-0.255745	0.092917	-2.7524	0.00591594
chr3	31074031-31074032	0.581229	0.836998	-0.25577	0.092951	-2.75166	0.0059294
chr3	18131796-18131797	0.503053	0.750864	-0.247811	0.0883267	-2.80561	0.00502208
chr3	131106891-131106892	0.351476	0.0880285	0.263448	0.0977375	2.69546	0.0070291
chr3	35641931-35641932	0.77513	0.520777	0.254353	0.092384	2.75322	0.00590124
chr3	106677558-106677559	0.921908	0.688703	0.233205	0.0801178	2.91078	0.00360529
chr3	93194616-93194617	0.829604	0.576663	0.252941	0.0920877	2.74674	0.00601913
chr3	114754142-114754143	0.650913	0.881419	-0.230506	0.0787128	-2.92844	0.00340668
chr3	91652371-91652372	0.495113	0.232088	0.263024	0.0983954	2.67313	0.00751461
chr3	153615279-153615280	0.903954	0.671347	0.232607	0.0800024	2.9075	0.00364332
chr3	18206726-18206727	0.69995	0.917802	-0.217852	0.0713402	-3.05371	0.00226033
chr4	33156327-33156328	0.0135826	0.422629	-0.409047	0.0930705	-4.39502	1.10764e-05
chr4	94643629-94643630	0.809303	0.324917	0.484387	0.122932	3.94028	8.13868e-05
chr4	15713940-15713941	0.230223	0.616149	-0.385926	0.0948006	-4.07092	4.68272e-05
chr4	95324409-95324410	0.754446	0.304012	0.450434	0.116608	3.86282	0.000112085
chr4	10193076-10193077	0.959789	0.627313	0.332476	0.0776439	4.28207	1.85165e-05
chr4	94676858-94676859	0.823159	0.355496	0.467663	0.122926	3.80444	0.000142127
chr4	60421815-60421816	0.470051	0.838834	-0.368784	0.0902713	-4.08528	4.40237e-05
chr4	104768941-104768942	0.34283	0.715921	-0.37309	0.0925848	-4.02972	5.58438e-05
chr4	94955420-94955421	0.616174	0.929663	-0.313489	0.0799137	-3.92284	8.75104e-05
chr4	60380233-60380234	0.568419	0.918557	-0.350138	0.0959905	-3.64763	0.000264669
chr4	137155208-137155209	0.437773	0.804011	-0.366238	0.102279	-3.58079	0.000342557
chr4	15713939-15713940	0.26203	0.612417	-0.350388	0.0965239	-3.63006	0.000283355
chr4	94903369-94903370	0.779364	0.400108	0.379256	0.108527	3.49458	0.0004748
chr4	39526549-39526550	0.424273	0.75892	-0.334646	0.0925703	-3.61505	0.000300291
chr4	15080544-15080545	0.877354	0.523125	0.354229	0.1004	3.52817	0.000418438
chr4	137230201-137230202	0.704883	0.996517	-0.291635	0.0782403	-3.72742	0.000193448
chr4	115957967-115957968	0.923727	0.621086	0.302642	0.0830021	3.64619	0.000266155
chr4	94629188-94629189	0.763617	0.343313	0.420304	0.132453	3.17322	0.00150756
chr4	31604205-31604206	0.0238374	0.496313	-0.472476	0.160228	-2.94878	0.00319034
chr4	109805853-109805854	0.368763	0.684197	-0.315434	0.0936903	-3.36678	0.000760522
chr4	136754300-136754301	0.879441	0.537032	0.342408	0.106118	3.22666	0.00125243
chr4	11810402-11810403	0.241065	0.553434	-0.31237	0.0934934	-3.34109	0.000834508
chr4	140249131-140249132	0.555587	0.214569	0.341018	0.107188	3.18149	0.00146518
chr4	96591906-96591907	0.138886	0.447443	-0.308557	0.0937277	-3.29206	0.000994576
chr4	139814508-139814509	0.743453	0.411404	0.332048	0.105965	3.13358	0.00172689
chr4	108047637-108047638	0.611873	0.904649	-0.292776	0.0890285	-3.28856	0.00100701
chr4	136449782-136449783	0.598079	0.244045	0.354033	0.117674	3.0086	0.00262456
chr4	87447226-87447227	0.887888	0.618897	0.26899	0.0783514	3.43313	0.000596661
chr4	148232913-148232914	0.882251	0.591535	0.290716	0.0911228	3.19037	0.00142089
chr4	15713807-15713808	0.227988	0.536188	-0.308201	0.100645	-3.06224	0.00219684
chr4	104469607-104469608	0.964644	0.719387	0.245257	0.070275	3.48996	0.000483094
chr4	103353080-103353081	0.324723	0.625954	-0.301231	0.0979275	-3.07606	0.00209754
chr4	153271954-153271955	0.739379	0.427458	0.311922	0.103477	3.01442	0.00257472
chr4	90996346-90996347	0.422123	0.724407	-0.302284	0.100196	-3.01692	0.0025536
chr4	117050093-117050094	0.526078	0.818863	-0.292785	0.0957397	-3.05813	0.0022272
chr4	131723526-131723527	0.486909	0.197749	0.28916	0.0940022	3.0761	0.0020973
chr4	135410822-135410823	0.5469	0.852083	-0.305183	0.102026	-2.99124	0.00277851
chr4	8826474-8826475	0.465056	0.751307	-0.28625	0.0927199	-3.08726	0.00202012
chr4	104839791-104839792	0.38995	0.710769	-0.32082	0.11006	-2.91495	0.00355746
chr4	59574658-59574659	0.409598	0.709323	-0.299725	0.0999955	-2.99738	0.00272309
chr4	111961825-111961826	0.263649	0.561889	-0.29824	0.0994881	-2.99774	0.00271988
chr4	127431543-127431544	0.580976	0.271703	0.309274	0.105274	2.93779	0.00330557
chr4	20410538-20410539	0.816354	0.504691	0.311663	0.106693	2.92111	0.00348786
chr4	117398848-117398849	0.905877	0.635681	0.270196	0.0857808	3.14984	0.0016336
chr4	119071076-119071077	0.419989	0.713186	-0.293197	0.0976053	-3.0039	0.00266539
chr4	48245007-48245008	0.119833	0.40854	-0.288707	0.0958396	-3.0124	0.00259188
chr4	34049792-34049793	0.649515	0.926226	-0.276712	0.0898707	-3.079	0.00207698
chr4	105214711-105214712	0.0523594	0.295003	-0.242644	0.0726842	-3.33833	0.000842851
chr4	130114177-130114178	0.484992	0.785352	-0.30036	0.102311	-2.93574	0.00332748
chr4	30990444-30990445	0.757729	0.997105	-0.239377	0.0714387	-3.3508	0.000805781
chr4	11490428-11490429	0.464462	0.751239	-0.286778	0.0962203	-2.98043	0.00287845
chr4	26468673-26468674	0.666691	0.917205	-0.250513	0.0775274	-3.23129	0.00123233
chr4	19446719-19446720	0.514872	0.228004	0.286868	0.0965115	2.97237	0.00295506
chr4	154732336-154732337	0.654364	0.929948	-0.275585	0.0908056	-3.03489	0.00240626
chr4	91483926-91483927	0.867651	0.589912	0.277739	0.0922432	3.01094	0.00260436
chr4	71687176-71687177	0.436075	0.718195	-0.28212	0.0948088	-2.97567	0.00292348
chr4	128243044-128243045	0.484496	0.787591	-0.303095	0.105783	-2.86525	0.00416674
chr4	48160662-48160663	0.248698	0.526131	-0.277433	0.0928623	-2.98758	0.002812
chr4	136837190-136837191	0.46084	0.16062	0.30022	0.105297	2.85116	0.00435594
chr4	136786041-136786042	0.880585	0.59134	0.289245	0.0995416	2.90577	0.00366355
chr4	42890125-42890126	0.733429	0.9772	-0.243771	0.0757114	-3.21974	0.00128306
chr4	135410817-135410818	0.648501	0.905093	-0.256592	0.0824991	-3.11024	0.00186936
chr4	130220352-130220353	0.94928	0.674291	0.274989	0.0922942	2.97948	0.00288734
chr4	118523054-118523055	0.208395	0.551851	-0.343457	0.128678	-2.66912	0.00760511
chr4	33120027-33120028	0.935554	0.691741	0.243814	0.0758813	3.21309	0.00131314
chr4	118270412-118270413	0.862795	0.572157	0.290638	0.100845	2.88203	0.00395128
chr4	45317695-45317696	0.590605	0.300213	0.290392	0.10111	2.87204	0.00407832
chr4	127674690-127674691	0.557602	0.212141	0.345461	0.131504	2.62699	0.00861433
chr4	134897922-134897923	0.647374	0.905418	-0.258044	0.08452	-3.05305	0.0022653
chr4	66401952-66401953	0.529907	0.241366	0.288542	0.101485	2.8432	0.00446625
chr4	120033804-120033805	0.611856	0.317001	0.294856	0.105518	2.79435	0.00520034
chr4	123959490-123959491	0.967312	0.707885	0.259426	0.0864161	3.00206	0.00268159
chr4	152418114-152418115	0.956661	0.693564	0.263097	0.0887118	2.96574	0.00301951
chr4	154146073-154146074	0.740323	0.978052	-0.237729	0.0753707	-3.15413	0.00160976
chr4	125869552-125869553	0.735295	0.970821	-0.235526	0.0748169	-3.14803	0.00164377
chr4	108282097-108282098	0.980931	0.749611	0.23132	0.0725943	3.18648	0.00144014
chr4	150866676-150866677	0.522373	0.801396	-0.279023	0.0993589	-2.80823	0.00498146
chr4	154568779-154568780	0.95705	0.717929	0.239121	0.0772072	3.09714	0.00195398
chr4	24792694-24792695	0.525697	0.2357	0.289998	0.105655	2.74476	0.0060555
chr4	48351318-48351319	0.332178	0.619801	-0.287622	0.104531	-2.75154	0.00593156
chr4	31521016-31521017	0.941351	0.661731	0.27962	0.100201	2.79058	0.00526135
chr4	105149680-105149681	0.179323	0.43363	-0.254307	0.0861431	-2.95215	0.00315574
chr4	62570772-62570773	0.851662	0.5855	0.266162	0.0934225	2.84902	0.00438545
chr4	117972869-117972870	0.0915131	0.373222	-0.281709	0.102305	-2.75363	0.00589389
chr4	154682802-154682803	0.396696	0.685447	-0.288751	0.106309	-2.71614	0.00660483
chr4	8740652-8740653	0.591556	0.850058	-0.258502	0.0892171	-2.89745	0.00376214
chr4	92414633-92414634	0.724686	0.442121	0.282565	0.102831	2.74787	0.00599839
chr4	141603115-141603116	0.783598	0.496531	0.287067	0.105709	2.71562	0.00661516
chr4	47998201-47998202	0.815971	0.532767	0.283204	0.103586	2.734	0.00625692
chr4	128486831-128486832	0.632811	0.901917	-0.269106	0.0963953	-2.7917	0.00524327
chr4	39526527-39526528	0.611898	0.85932	-0.247422	0.0840424	-2.94401	0.00323986
chr4	88920993-88920994	0.847612	0.478875	0.368737	0.154426	2.3878	0.0169498
chr4	73339165-73339166	0.957534	0.737375	0.220158	0.0685459	3.21184	0.00131888
chr4	72678653-72678654	0.771165	0.512932	0.258233	0.0903421	2.85839	0.00425795
chr4	151561614-151561615	0.923705	0.666973	0.256732	0.0896521	2.86365	0.00418794
chr4	88935892-88935893	0.493983	0.227162	0.266821	0.0954934	2.79413	0.0052039
chr4	57514606-57514607	0.542236	0.809428	-0.267192	0.0961286	-2.77952	0.00544387
chr4	47922355-47922356	0.656542	0.911009	-0.254467	0.0887992	-2.86565	0.00416156
chr4	17463790-17463791	0.856007	0.607652	0.248355	0.0854651	2.90592	0.00366175
chr4	40102160-40102161	0.854492	0.597879	0.256613	0.0902502	2.84335	0.00446418
chr4	142625108-142625109	0.767903	0.994923	-0.22702	0.0733155	-3.09648	0.0019583
chr4	124669729-124669730	0.763181	0.982092	-0.218912	0.0687565	-3.18387	0.00145322
chr4	91227366-91227367	0.5141	0.778017	-0.263917	0.0948427	-2.78268	0.00539126
chr4	44522961-44522962	0.783158	0.484057	0.299102	0.115494	2.58976	0.00960421
chr4	139274022-139274023	0.757317	0.976398	-0.219081	0.0692957	-3.16154	0.00156938
chr4	61976565-61976566	0.290176	0.560597	-0.270421	0.0993867	-2.7209	0.00651046
chr4	154493632-154493633	0.997118	0.759428	0.23769	0.0802852	2.96058	0.00307065
chr4	59276055-59276056	0.764709	0.502223	0.262486	0.0950803	2.76068	0.00576819
chr4	104914257-104914258	0.401454	0.145655	0.2558	0.0915886	2.79292	0.00522345
chr4	34414043-34414044	0.776126	0.505221	0.270905	0.100708	2.69001	0.00714501
chr4	60067243-60067244	0.570216	0.824906	-0.25469	0.0913593	-2.78779	0.00530696
chr4	22592658-22592659	0.887351	0.636574	0.250777	0.0892293	2.81048	0.00494674
chr4	85891732-85891733	0.615391	0.877736	-0.262345	0.0963976	-2.72149	0.00649887
chr4	8826330-8826331	0.402989	0.669491	-0.266502	0.0991051	-2.68909	0.0071648
chr4	104185080-104185081	0.90516	0.616272	0.288887	0.112709	2.56313	0.0103733
chr4	116199995-116199996	0.746262	0.973242	-0.226979	0.0759528	-2.98843	0.00280418
chr4	132978757-132978758	0.962286	0.727346	0.234939	0.0807302	2.91018	0.00361222
chr4	19313624-19313625	0.521319	0.783923	-0.262605	0.0976003	-2.69061	0.00713208
chr4	128896017-128896018	0.577452	0.842361	-0.264908	0.0989937	-2.67601	0.00745039
chr4	14390758-14390759	0.92653	0.693986	0.232544	0.0797796	2.91483	0.00355884
chr4	134969604-134969605	0.907932	0.651388	0.256544	0.0942796	2.72109	0.00650663
chr4	40181435-40181436	0.186127	0.433782	-0.247655	0.08915	-2.77796	0.00547016
chr4	52815813-52815814	0.506332	0.764895	-0.258563	0.0958576	-2.69736	0.00698912
chr4	45019727-45019728	0.914192	0.67511	0.239083	0.0840668	2.84396	0.00445566
chr4	141934453-141934454	0.875604	0.567944	0.30766	0.126252	2.43687	0.0148152
chr4	80046502-80046503	0.891435	0.653444	0.237991	0.0836233	2.84599	0.00442739
chr5	103761809-103761810	0.186239	0.798906	-0.612668	0.0803849	-7.62167	2.50409e-14
chr5	136600628-136600629	0.897138	0.301916	0.595222	0.084451	7.04814	1.8133e-12
chr5	135865765-135865766	0.627399	0.0776101	0.549789	0.0896512	6.13253	8.64903e-10
chr5	145283601-145283602	0.447449	0.995022	-0.547573	0.0898753	-6.09259	1.11102e-09
chr5	4089953-4089954	0.23424	0.827098	-0.592857	0.0997967	-5.94065	2.83887e-09
chr5	87081051-87081052	0.238651	0.711083	-0.472432	0.0890623	-5.30452	1.12972e-07
chr5	136915414-136915415	0.184591	0.704721	-0.520129	0.101094	-5.145	2.67516e-07
chr5	104505314-104505315	0.59333	0.997448	-0.404118	0.0734771	-5.49992	3.79974e-08
chr5	105226003-105226004	0.851392	0.381428	0.469964	0.0985978	4.76648	1.87477e-06
chr5	72793978-72793979	0.757145	0.307903	0.449243	0.103314	4.34834	1.37172e-05
chr5	29938138-29938139	0.162877	0.703906	-0.541029	0.130676	-4.14022	3.46966e-05
chr5	104339242-104339243	0.759346	0.328187	0.431159	0.103896	4.14992	3.32586e-05
chr5	34637696-34637697	0.232786	0.636603	-0.403818	0.0955625	-4.22569	2.38207e-05
chr5	136118995-136118996	0.368069	0.0283994	0.33967	0.0775875	4.37789	1.19834e-05
chr5	136003809-136003810	0.674258	0.996624	-0.322367	0.0733915	-4.39242	1.12094e-05
chr5	134136389-134136390	0.441567	0.844881	-0.403314	0.102887	-3.91998	8.8555e-05
chr5	81306733-81306734	0.926117	0.408496	0.517621	0.145331	3.56167	0.000368504
chr5	136919870-136919871	0.3684	0.0171324	0.351268	0.08789	3.99668	6.42381e-05
chr5	34417081-34417082	0.363239	0.73467	-0.371431	0.0954387	-3.89183	9.94914e-05
chr5	56532908-56532909	0.470525	0.820325	-0.3498	0.0884665	-3.95404	7.68429e-05
chr5	144788667-144788668	0.812421	0.432434	0.379987	0.0994124	3.82233	0.000132195
chr5	96304784-96304785	0.479887	0.843824	-0.363937	0.0938936	-3.87606	0.000106162
chr5	4089675-4089676	0.262392	0.713183	-0.450791	0.126112	-3.57452	0.000350864
chr5	32208757-32208758	0.0755632	0.428727	-0.353164	0.0914531	-3.8617	0.000112602
chr5	103761837-103761838	0.493776	0.845512	-0.351736	0.0925998	-3.79845	0.000145603
chr5	111271038-111271039	0.9605	0.60507	0.355431	0.0940511	3.77912	0.000157381
chr5	54658012-54658013	0.167763	0.509311	-0.341548	0.0889807	-3.83845	0.000123813
chr5	104571406-104571407	0.57128	0.185624	0.385655	0.105938	3.64039	0.00027223
chr5	136621471-136621472	0.642186	0.970321	-0.328135	0.0851512	-3.85355	0.000116416
chr5	78974298-78974299	0.748388	0.37672	0.371667	0.103201	3.60138	0.000316533
chr5	121288612-121288613	0.533423	0.957969	-0.424546	0.123466	-3.43857	0.000584789
chr5	73330888-73330889	0.47738	0.816401	-0.339021	0.0914064	-3.70894	0.000208129
chr5	75773159-75773160	0.940645	0.573781	0.366863	0.103296	3.55158	0.000382924
chr5	134646672-134646673	0.971566	0.529197	0.442369	0.132824	3.33048	0.000866962
chr5	72581809-72581810	0.311965	0.657351	-0.345386	0.0963791	-3.58362	0.000338869
chr5	24839358-24839359	0.553917	0.881836	-0.327919	0.0896843	-3.65637	0.00025581
chr5	77712689-77712690	0.769621	0.406287	0.363334	0.103994	3.4938	0.000476204
chr5	98991554-98991555	0.439091	0.777421	-0.33833	0.0943761	-3.58491	0.000337189
chr5	144966648-144966649	0.633074	0.263935	0.369139	0.106787	3.45678	0.000546671
chr5	104796424-104796425	0.627123	0.263047	0.364076	0.105126	3.46324	0.00053372
chr5	100899424-100899425	0.424901	0.773153	-0.348252	0.102314	-3.40376	0.00066466
chr5	92772914-92772915	0.54307	0.861059	-0.317988	0.0912232	-3.48583	0.000490621
chr5	4100978-4100979	0.487994	0.802213	-0.314219	0.0897707	-3.50024	0.000464843
chr5	111070675-111070676	0.885867	0.537239	0.348628	0.104327	3.34168	0.000832745
chr5	33163276-33163277	0.337537	0.702151	-0.364614	0.111709	-3.26397	0.00109861
chr5	37242882-37242883	0.359788	0.0578737	0.301914	0.086046	3.50875	0.00045022
chr5	121049490-121049491	0.371672	0.704959	-0.333288	0.099648	-3.34465	0.000823866
chr5	136788052-136788053	0.923568	0.62466	0.298908	0.0851016	3.51237	0.000444138
chr5	127521395-127521396	0.751075	0.406829	0.344246	0.105037	3.27739	0.00104773
chr5	135824994-135824995	0.997483	0.700726	0.296758	0.0848817	3.49613	0.000472057
chr5	134811863-134811864	0.654361	0.951833	-0.297472	0.0857384	-3.46953	0.000521379
chr5	77314852-77314853	0.17824	0.494803	-0.316563	0.0942354	-3.35928	0.000781456
chr5	115069051-115069052	0.939769	0.611676	0.328093	0.0995128	3.29699	0.000977255
chr5	101358216-101358217	0.26618	0.594611	-0.328432	0.0998433	-3.28947	0.00100376
chr5	51091730-51091731	0.895706	0.589264	0.306442	0.0905434	3.38448	0.000713137
chr5	136887102-136887103	0.583338	0.902014	-0.318676	0.0960128	-3.3191	0.000903087
chr5	37288855-37288856	0.612639	0.255478	0.357162	0.113723	3.14064	0.00168579
chr5	98028630-98028631	0.282985	0.62746	-0.344475	0.108635	-3.17095	0.00151941
chr5	136918717-136918718	0.318629	0.0548199	0.263809	0.0737813	3.57556	0.000349485
chr5	147409090-147409091	0.5272	0.848165	-0.320966	0.0998758	-3.21365	0.00131061
chr5	77569136-77569137	0.302335	0.623382	-0.321047	0.100084	-3.20777	0.00133768
chr5	35317272-35317273	0.913512	0.611204	0.302308	0.092113	3.28192	0.00103103
chr5	51091783-51091784	0.939289	0.643718	0.295571	0.0893422	3.3083	0.000938629
chr5	93266379-93266380	0.166161	0.483939	-0.317777	0.0995218	-3.19304	0.00140783
chr5	34575068-34575069	0.716277	0.400067	0.31621	0.102199	3.09408	0.00197426
chr5	34223951-34223952	0.808912	0.476295	0.332616	0.110213	3.01793	0.00254507
chr5	115725109-115725110	0.915929	0.483145	0.432784	0.159133	2.71963	0.00653552
chr5	100910837-100910838	0.58954	0.880668	-0.291128	0.0910797	-3.19641	0.00139151
chr5	5450947-5450948	0.908601	0.631659	0.276942	0.0857588	3.22931	0.00124087
chr5	119345303-119345304	0.580001	0.863385	-0.283384	0.0890793	-3.18125	0.00146639
chr5	50644405-50644406	0.395244	0.677059	-0.281815	0.0888444	-3.172	0.00151391
chr5	54467402-54467403	0.657384	0.373499	0.283885	0.0900144	3.15377	0.00161175
chr5	102752210-102752211	0.816379	0.53059	0.285789	0.0914577	3.12483	0.00177909
chr5	103208248-103208249	0.793033	0.495251	0.297783	0.0974813	3.05477	0.00225234
chr5	81280487-81280488	0.235847	0.565719	-0.329872	0.113461	-2.90736	0.00364491
chr5	114372348-114372349	0.120374	0.419524	-0.29915	0.0986274	-3.03314	0.00242026
chr5	97868004-97868005	0.724628	0.427036	0.297592	0.0980167	3.03614	0.00239628
chr5	49532038-49532039	0.768226	0.996598	-0.228372	0.0641263	-3.56129	0.000369039
chr5	53497488-53497489	0.102901	0.406527	-0.303626	0.102378	-2.96575	0.00301948
chr5	104825405-104825406	0.975704	0.707459	0.268244	0.0851297	3.151	0.0016271
chr5	91940378-91940379	0.738262	0.979145	-0.240883	0.071443	-3.37168	0.000747111
chr5	53212230-53212231	0.145456	0.418862	-0.273406	0.0884437	-3.0913	0.00199283
chr5	3938882-3938883	0.862242	0.455222	0.407019	0.158288	2.57139	0.0101292
chr5	67572710-67572711	0.726415	0.440954	0.285461	0.0956136	2.98557	0.00283049
chr5	120282797-120282798	0.876467	0.596999	0.279468	0.0925975	3.0181	0.00254366
chr5	122261468-122261469	0.944443	0.673364	0.271079	0.0885252	3.06217	0.00219736
chr5	135065333-135065334	0.957835	0.707868	0.249967	0.0776371	3.21969	0.00128331
chr5	121703040-121703041	0.620605	0.907467	-0.286861	0.0969549	-2.95871	0.00308931
chr5	90448905-90448906	0.425626	0.708895	-0.283269	0.09519	-2.97583	0.002922
chr5	49552239-49552240	0.955971	0.700755	0.255215	0.0808863	3.15524	0.00160366
chr5	77167548-77167549	0.12875	0.465622	-0.336872	0.123672	-2.72392	0.00645121
chr5	99257543-99257544	0.605382	0.872874	-0.267492	0.0876057	-3.05336	0.00226293
chr5	35428417-35428418	0.066179	0.330604	-0.264425	0.086084	-3.07171	0.00212839
chr5	144363780-144363781	0.0963279	0.387665	-0.291337	0.100549	-2.89747	0.00376188
chr5	55837115-55837116	0.968824	0.729219	0.239606	0.0734073	3.26406	0.00109828
chr5	149964777-149964778	0.0636942	0.341662	-0.277968	0.0936131	-2.96932	0.00298457
chr5	124748399-124748400	0.629592	0.905984	-0.276392	0.0929385	-2.97392	0.00294019
chr5	135857591-135857592	0.57685	0.861752	-0.284903	0.0975754	-2.91982	0.00350232
chr5	38297831-38297832	0.672993	0.365563	0.30743	0.109869	2.79815	0.00513955
chr5	50160747-50160748	0.18303	0.504785	-0.321755	0.118261	-2.72072	0.00651405
chr5	115069048-115069049	0.965407	0.688115	0.277292	0.0944535	2.93576	0.00332736
chr5	77099661-77099662	0.0730232	0.331222	-0.258199	0.0843491	-3.06107	0.00220544
chr5	28229557-28229558	0.84534	0.566395	0.278944	0.09554	2.91966	0.00350414
chr5	57311392-57311393	0.608351	0.326623	0.281729	0.0974273	2.89168	0.00383188
chr5	105531285-105531286	0.590104	0.865066	-0.274962	0.0938129	-2.93096	0.00337912
chr5	119365405-119365406	0.536426	0.236089	0.300337	0.107475	2.79448	0.00519834
chr5	92680964-92680965	0.681721	0.938866	-0.257145	0.0843457	-3.0487	0.00229835
chr5	34574861-34574862	0.464134	0.192408	0.271726	0.0924596	2.93887	0.00329415
chr5	136556053-136556054	0.783587	0.492662	0.290925	0.102902	2.82721	0.00469549
chr5	150232488-150232489	0.0821851	0.33646	-0.254274	0.0832818	-3.05318	0.00226429
chr5	138366274-138366275	0.586401	0.859186	-0.272785	0.0935663	-2.91542	0.00355209
chr5	87081205-87081206	0.29872	0.572407	-0.273687	0.0943224	-2.90161	0.00371251
chr5	66069352-66069353	0.316782	0.0647627	0.25202	0.08276	3.04519	0.00232536
chr5	139520511-139520512	0.870747	0.586096	0.284652	0.10098	2.81889	0.00481906
chr5	107168571-107168572	0.0756956	0.325726	-0.250031	0.0820606	-3.0469	0.00231215
chr5	123934137-123934138	0.894435	0.626171	0.268265	0.0922234	2.90886	0.00362754
chr5	52775552-52775553	0.622209	0.876022	-0.253813	0.0845647	-3.00141	0.00268733
chr5	125963132-125963133	0.66395	0.918238	-0.254288	0.0848424	-2.99718	0.00272493
chr5	103629486-103629487	0.316501	0.607954	-0.291453	0.105408	-2.76501	0.00569213
chr5	77777153-77777154	0.931609	0.595354	0.336254	0.130427	2.57811	0.00993412
chr5	104470927-104470928	0.910006	0.63778	0.272226	0.0950728	2.86335	0.00419194
chr5	7272801-7272802	0.986262	0.765235	0.221028	0.0667993	3.30884	0.000936846
chr5	81660330-81660331	0.722434	0.452301	0.270133	0.0941272	2.86987	0.00410642
chr5	3377641-3377642	0.48539	0.784129	-0.298739	0.110134	-2.7125	0.00667779
chr5	98991573-98991574	0.287378	0.580733	-0.293355	0.107299	-2.734	0.00625706
chr5	117897723-117897724	0.902394	0.635103	0.267292	0.0929462	2.87577	0.00403049
chr5	75586166-75586167	0.963554	0.698827	0.264727	0.0919839	2.87797	0.00400247
chr5	88385015-88385016	0.930769	0.633928	0.296841	0.110808	2.67888	0.00738692
chr5	77061357-77061358	0.908407	0.654667	0.25374	0.0865391	2.93208	0.00336698
chr5	120565146-120565147	0.131673	0.417884	-0.286211	0.105023	-2.72523	0.00642561
chr5	112560458-112560459	0.7029	0.948649	-0.245749	0.082253	-2.98772	0.00281069
chr5	92310494-92310495	0.601374	0.875092	-0.273719	0.0982294	-2.78652	0.00532768
chr5	115487995-115487996	0.775802	0.995237	-0.219435	0.067755	-3.23865	0.00120098
chr5	123896734-123896735	0.953027	0.701291	0.251736	0.0861439	2.92227	0.00347489
chr5	124078339-124078340	0.639777	0.337252	0.302526	0.115306	2.62367	0.0086989
chr5	75020083-75020084	0.463676	0.733393	-0.269717	0.0970246	-2.77988	0.0054379
chr5	86637688-86637689	0.404188	0.670648	-0.26646	0.0951811	-2.79951	0.00511807
chr5	55704887-55704888	0.895824	0.63362	0.262203	0.0929167	2.82192	0.00477373
chr5	144022195-144022196	0.741496	0.964172	-0.222676	0.0703791	-3.16395	0.00155645
chr5	131573605-131573606	0.130374	0.404888	-0.274514	0.100221	-2.73909	0.00616104
chr5	104595010-104595011	0.609017	0.853439	-0.244422	0.0830113	-2.94444	0.00323536
chr5	148147362-148147363	0.709078	0.945229	-0.236151	0.0783359	-3.0146	0.00257322
chr5	144019947-144019948	0.815003	0.535404	0.279599	0.103423	2.70346	0.00686224
chr5	113907446-113907447	0.734996	0.45396	0.281036	0.104256	2.69564	0.00702527
chr5	92790853-92790854	0.541426	0.818886	-0.27746	0.102206	-2.7147	0.00663358
chr5	26982221-26982222	0.894198	0.64417	0.250028	0.0864389	2.89254	0.00382145
chr5	29492573-29492574	0.627502	0.881336	-0.253834	0.0887469	-2.8602	0.00423372
chr5	64468522-64468523	0.613256	0.866604	-0.253347	0.0885341	-2.86158	0.00421537
chr5	150056281-150056282	0.196888	0.471664	-0.274776	0.101043	-2.7194	0.00654003
chr5	127477775-127477776	0.267481	0.549145	-0.281664	0.105086	-2.68032	0.0073552
chr5	133240704-133240705	0.566484	0.82586	-0.259377	0.0922489	-2.8117	0.00492798
chr5	120757836-120757837	0.700498	0.948837	-0.248338	0.0859433	-2.88956	0.00385782
chr5	75822052-75822053	0.923385	0.648374	0.275011	0.101456	2.71063	0.00671555
chr5	131277326-131277327	0.862571	0.600232	0.262339	0.0944237	2.77831	0.00546418
chr5	125442700-125442701	0.795197	0.524869	0.270328	0.0991186	2.72732	0.00638511
chr5	105829449-105829450	0.406919	0.149399	0.25752	0.0919538	2.80053	0.00510186
chr5	126150504-126150505	0.955722	0.61644	0.339282	0.140446	2.41575	0.0157026
chr5	73846001-73846002	0.730201	0.471623	0.258577	0.0928542	2.78477	0.00535658
chr5	56629591-56629592	0.51754	0.781723	-0.264183	0.096169	-2.74708	0.00601292
chr5	57296389-57296390	0.856442	0.605424	0.251018	0.0890336	2.81937	0.00481184
chr5	70121930-70121931	0.593493	0.846491	-0.252999	0.0902041	-2.80474	0.00503577
chr5	132546315-132546316	0.580271	0.312345	0.267926	0.0990978	2.70366	0.00685811
chr5	68168983-68168984	0.69826	0.42937	0.26889	0.0996976	2.69705	0.00699563
chr5	97062067-97062068	0.259863	0.54342	-0.283557	0.108539	-2.61249	0.0089886
chr5	4485882-4485883	0.539232	0.807206	-0.267974	0.0994204	-2.69536	0.00703127
chr5	74317881-74317882	0.894043	0.653657	0.240387	0.0832679	2.8869	0.00389052
chr5	66765217-66765218	0.997187	0.790517	0.20667	0.0632626	3.26685	0.0010875
chr5	3665643-3665644	0.788164	0.524051	0.264112	0.0974339	2.71068	0.00671453
chr5	105800021-105800022	0.211354	0.484095	-0.272741	0.10262	-2.65777	0.00786593
chr5	19956294-19956295	0.540143	0.788922	-0.248778	0.0883743	-2.81505	0.00487689
chr5	56630841-56630842	0.668999	0.41568	0.253319	0.0916424	2.76421	0.00570612
chr5	100322045-100322046	0.660298	0.388681	0.271617	0.102649	2.64606	0.00814354
chr5	149241610-149241611	0.965951	0.737459	0.228492	0.0767954	2.97533	0.00292671
chr5	104505321-104505322	0.708611	0.9404	-0.231789	0.0789538	-2.93576	0.00332736
chr5	72893948-72893949	0.776226	0.482139	0.294088	0.116653	2.52104	0.011701
chr5	51466275-51466276	0.396627	0.664233	-0.267605	0.100755	-2.65601	0.00790708
chr5	49278301-49278302	0.595179	0.331385	0.263794	0.0987072	2.67249	0.00752917
chr5	66283731-66283732	0.259301	0.521653	-0.262352	0.0980158	-2.67663	0.00743677
chr5	122669874-122669875	0.997075	0.79609	0.200985	0.0609763	3.29611	0.000980342
chr5	4101230-4101231	0.473146	0.733146	-0.26	0.0968993	-2.68319	0.0072923
chr5	104806290-104806291	0.958457	0.735752	0.222705	0.0743496	2.99537	0.0027411
chr5	151585602-151585603	0.791836	0.5398	0.252036	0.092182	2.73412	0.00625479
chr5	117988267-117988268	0.738362	0.958657	-0.220295	0.0729119	-3.02139	0.00251618
chr5	93009075-93009076	0.647285	0.885584	-0.238299	0.0839306	-2.83924	0.0045221
chr5	117984063-117984064	0.791606	0.996119	-0.204513	0.0634686	-3.22227	0.00127177
chr6	105376301-105376302	0.409393	0.882228	-0.472835	0.0787553	-6.00385	1.92694e-09
chr6	140266197-140266198	0.969751	0.544867	0.424884	0.0899572	4.72318	2.32187e-06
chr6	88689541-88689542	0.484006	0.915879	-0.431873	0.0921085	-4.68874	2.7489e-06
chr6	122336939-122336940	0.259081	0.724711	-0.46563	0.105157	-4.42797	9.51258e-06
chr6	138463440-138463441	0.240774	0.601933	-0.361159	0.0885217	-4.0799	4.50559e-05
chr6	43158944-43158945	0.32249	0.682067	-0.359576	0.0896357	-4.01153	6.03266e-05
chr6	100107088-100107089	0.909503	0.526901	0.382602	0.0976175	3.9194	8.87712e-05
chr6	121035626-121035627	0.35157	0.801423	-0.449853	0.127459	-3.52939	0.000416521
chr6	67170936-67170937	0.99727	0.632087	0.365183	0.0990625	3.68639	0.000227459
chr6	138804139-138804140	0.952998	0.655702	0.297297	0.0754059	3.94262	8.0596e-05
chr6	120462743-120462744	0.629512	0.950506	-0.320994	0.0889905	-3.60706	0.000309692
chr6	71150203-71150204	0.604113	0.926518	-0.322404	0.0899064	-3.586	0.000335786
chr6	38242807-38242808	0.665845	0.324331	0.341514	0.0980507	3.48303	0.000495769
chr6	144337587-144337588	0.922636	0.609901	0.312736	0.0869184	3.59804	0.000320629
chr6	108326237-108326238	0.302541	0.629628	-0.327087	0.0941268	-3.47496	0.000510934
chr6	77692542-77692543	0.832201	0.517959	0.314242	0.0888476	3.53687	0.000404905
chr6	140468020-140468021	0.932618	0.59455	0.338068	0.0988609	3.41963	0.00062706
chr6	121162842-121162843	0.387383	0.728193	-0.34081	0.10151	-3.35742	0.000786739
chr6	103286647-103286648	0.476458	0.805466	-0.329008	0.0969463	-3.39371	0.000689514
chr6	72149126-72149127	0.952047	0.606497	0.34555	0.106057	3.25815	0.0011214
chr6	38242808-38242809	0.615312	0.291465	0.323848	0.0968581	3.34353	0.000827208
chr6	139020382-139020383	0.829346	0.511749	0.317597	0.0946375	3.35593	0.000790995
chr6	144491455-144491456	0.462482	0.792745	-0.330263	0.100621	-3.28224	0.00102984
chr6	7779292-7779293	0.692243	0.366386	0.325857	0.0987294	3.30051	0.00096509
chr6	136467655-136467656	0.473848	0.166357	0.307491	0.091223	3.37076	0.000749623
chr6	144457754-144457755	0.23083	0.621576	-0.390746	0.128505	-3.04071	0.00236021
chr6	144361066-144361067	0.891071	0.548006	0.343065	0.107517	3.19078	0.00141887
chr6	63111359-63111360	0.982332	0.729452	0.25288	0.0681701	3.70955	0.000207628
chr6	6756291-6756292	0.823509	0.524762	0.298747	0.0894458	3.33998	0.000837834
chr6	72148964-72148965	0.911338	0.544606	0.366732	0.12024	3.05001	0.00228832
chr6	130599245-130599246	0.65626	0.34173	0.31453	0.0967513	3.25091	0.00115035
chr6	82194513-82194514	0.858529	0.515023	0.343507	0.110925	3.09674	0.00195662
chr6	121870540-121870541	0.322692	0.652164	-0.329472	0.104583	-3.15033	0.00163086
chr6	71547781-71547782	0.271504	0.608632	-0.337127	0.109988	-3.06514	0.00217569
chr6	91536632-91536633	0.448449	0.15754	0.290908	0.0891825	3.26194	0.00110651
chr6	54883282-54883283	0.390653	0.68632	-0.295667	0.0915272	-3.23037	0.00123629
chr6	65354080-65354081	0.769951	0.40411	0.365841	0.124842	2.93043	0.00338492
chr6	140660581-140660582	0.979595	0.688716	0.290879	0.0902604	3.22266	0.00127005
chr6	72162782-72162783	0.765928	0.433904	0.332024	0.109778	3.02449	0.0024905
chr6	22206480-22206481	0.440743	0.751926	-0.311183	0.10061	-3.09298	0.00198158
chr6	121202971-121202972	0.32542	0.737388	-0.411968	0.14921	-2.761	0.0057624
chr6	5986755-5986756	0.53711	0.212637	0.324473	0.107247	3.02546	0.00248254
chr6	141689371-141689372	0.607175	0.891204	-0.284029	0.0880976	-3.22402	0.00126404
chr6	100769591-100769592	0.982865	0.730496	0.252369	0.0732536	3.44514	0.000570764
chr6	85194808-85194809	0.515297	0.203328	0.311969	0.102236	3.05146	0.00227731
chr6	91348910-91348911	0.593142	0.902549	-0.309407	0.101217	-3.05687	0.00223662
chr6	134496195-134496196	0.659102	0.920514	-0.261413	0.0784494	-3.33225	0.000861473
chr6	134496207-134496208	0.389998	0.71134	-0.321342	0.108308	-2.96693	0.00300789
chr6	30555267-30555268	0.486675	0.780194	-0.293519	0.0950424	-3.08829	0.00201312
chr6	121827528-121827529	0.397893	0.696801	-0.298907	0.0976998	-3.05945	0.00221745
chr6	113860590-113860591	0.581767	0.872045	-0.290279	0.0935579	-3.10267	0.00191786
chr6	127534342-127534343	0.502679	0.785288	-0.28261	0.0898787	-3.14434	0.00166459
chr6	67908387-67908388	0.919129	0.661004	0.258125	0.0781317	3.30372	0.000954122
chr6	88956050-88956051	0.663796	0.34548	0.318316	0.107926	2.94938	0.0031841
chr6	88758367-88758368	0.375968	0.69833	-0.322362	0.110054	-2.92913	0.00339911
chr6	117120612-117120613	0.960713	0.700998	0.259715	0.0796471	3.26082	0.0011109
chr6	121254083-121254084	0.294394	0.688852	-0.394458	0.148424	-2.65765	0.00786883
chr6	23414526-23414527	0.297959	0.579314	-0.281356	0.091325	-3.08082	0.00206432
chr6	53845653-53845654	0.799364	0.504071	0.295292	0.098687	2.99221	0.00276963
chr6	49320264-49320265	0.290989	0.608395	-0.317407	0.109922	-2.88756	0.00388237
chr6	37394617-37394618	0.30082	0.58805	-0.28723	0.0949528	-3.02497	0.00248655
chr6	65432128-65432129	0.90702	0.526312	0.380708	0.143323	2.65629	0.00790063
chr6	51391241-51391242	0.663737	0.931716	-0.267979	0.0857022	-3.12687	0.0017668
chr6	128523127-128523128	0.411429	0.117264	0.294165	0.0994791	2.95705	0.00310594
chr6	94466246-94466247	0.386416	0.660999	-0.274583	0.089631	-3.06348	0.00218776
chr6	146127243-146127244	0.504746	0.213031	0.291715	0.0986643	2.95665	0.00311004
chr6	140378963-140378964	0.939511	0.676127	0.263383	0.0849278	3.10126	0.00192696
chr6	29460812-29460813	0.649158	0.932568	-0.28341	0.0956521	-2.96293	0.00304728
chr6	72104869-72104870	0.8773	0.534132	0.343168	0.127228	2.69726	0.00699117
chr6	118735380-118735381	0.605346	0.874999	-0.269653	0.088657	-3.04153	0.0023538
chr6	100645535-100645536	0.899591	0.641064	0.258528	0.0830499	3.11292	0.00185247
chr6	11711541-11711542	0.640054	0.358223	0.281831	0.0955052	2.95095	0.00316803
chr6	147470349-147470350	0.816097	0.535417	0.28068	0.0954539	2.94048	0.00327709
chr6	140388899-140388900	0.971699	0.664897	0.306802	0.109321	2.80643	0.00500943
chr6	112810103-112810104	0.937276	0.690452	0.246824	0.0775817	3.18147	0.00146528
chr6	98630488-98630489	0.734056	0.447974	0.286082	0.0989338	2.89165	0.00383228
chr6	41199263-41199264	0.229405	0.501106	-0.271701	0.0915723	-2.96707	0.00300653
chr6	71847108-71847109	0.969769	0.65416	0.315609	0.115387	2.73521	0.006234
chr6	122628477-122628478	0.824617	0.506177	0.31844	0.117369	2.71314	0.00666488
chr6	20308937-20308938	0.366649	0.638621	-0.271972	0.0926011	-2.93703	0.00331375
chr6	121850631-121850632	0.432009	0.705259	-0.27325	0.0934331	-2.92455	0.00344954
chr6	136957872-136957873	0.70565	0.95692	-0.25127	0.0819127	-3.06753	0.00215835
chr6	136967052-136967053	0.638905	0.91382	-0.274915	0.0948257	-2.89916	0.00374167
chr6	147841397-147841398	0.68675	0.414629	0.272121	0.093567	2.9083	0.00363397
chr6	113892961-113892962	0.725732	0.973044	-0.247312	0.080567	-3.06964	0.00214314
chr6	109979829-109979830	0.638629	0.357961	0.280667	0.0989861	2.83542	0.00457654
chr6	116265015-116265016	0.222528	0.503558	-0.28103	0.0994176	-2.82677	0.00470206
chr6	51083278-51083279	0.970962	0.731495	0.239467	0.0770046	3.10977	0.00187232
chr6	120147586-120147587	0.644559	0.913474	-0.268915	0.0935801	-2.87364	0.00405777
chr6	83723585-83723586	0.611273	0.879084	-0.267811	0.0932184	-2.87294	0.00406666
chr6	67441710-67441711	0.811145	0.452657	0.358487	0.14464	2.47848	0.0131945
chr6	41604235-41604236	0.0608543	0.291386	-0.230532	0.0728193	-3.16581	0.00154653
chr6	71847071-71847072	0.906336	0.612522	0.293814	0.10858	2.70595	0.00681087
chr6	66532249-66532250	0.997615	0.606761	0.390854	0.164593	2.37467	0.0175648
chr6	24610827-24610828	0.349851	0.619073	-0.269222	0.0953966	-2.82213	0.00477054
chr6	144491423-144491424	0.551279	0.825455	-0.274176	0.0982079	-2.7918	0.00524165
chr6	114094541-114094542	0.61943	0.890878	-0.271448	0.0968387	-2.80309	0.00506152
chr6	113835956-113835957	0.832186	0.567474	0.264712	0.093172	2.84111	0.00449569
chr6	145030915-145030916	0.858617	0.581561	0.277056	0.100209	2.76479	0.00569603
chr6	141611188-141611189	0.19577	0.454389	-0.258619	0.0899657	-2.87464	0.00404491
chr6	131716351-131716352	0.818891	0.556796	0.262095	0.0920046	2.84872	0.00438958
chr6	138897337-138897338	0.780533	0.516911	0.263622	0.0929596	2.83587	0.00457003
chr6	71847034-71847035	0.946355	0.627863	0.318491	0.124715	2.55376	0.0106566
chr6	144491523-144491524	0.392656	0.670369	-0.277713	0.101374	-2.7395	0.00615325
chr6	38365327-38365328	0.908457	0.659891	0.248566	0.0847165	2.93409	0.00334523
chr6	100517200-100517201	0.665663	0.922746	-0.257082	0.0896677	-2.86706	0.0041431
chr6	144457396-144457397	0.295298	0.616497	-0.321198	0.126795	-2.53321	0.0113024
chr6	101979751-101979752	0.608818	0.336558	0.27226	0.0988034	2.75558	0.0058589
chr6	147444927-147444928	0.249101	0.515986	-0.266885	0.0958986	-2.78299	0.005386
chr6	8622352-8622353	0.673782	0.978531	-0.30475	0.117877	-2.58532	0.00972881
chr6	112091806-112091807	0.309904	0.578831	-0.268926	0.0978014	-2.74972	0.00596463
chr6	108254871-108254872	0.737922	0.469489	0.268433	0.0975542	2.75163	0.00592992
chr6	4484164-4484165	0.747833	0.479278	0.268556	0.0979602	2.74148	0.00611634
chr6	8208908-8208909	0.822725	0.538413	0.284312	0.107883	2.63537	0.00840445
chr6	143414705-143414706	0.981597	0.76973	0.211867	0.0655178	3.23373	0.00122185
chr6	56686419-56686420	0.923	0.693429	0.229571	0.0760553	3.01848	0.0025405
chr6	121053243-121053244	0.975217	0.734205	0.241011	0.0829978	2.90383	0.00368629
chr6	106504260-106504261	0.542909	0.802783	-0.259873	0.0942989	-2.75584	0.0058541
chr6	118404039-118404040	0.416855	0.684442	-0.267586	0.0991532	-2.69872	0.00696076
chr6	42624046-42624047	0.715643	0.447075	0.268567	0.0997845	2.69147	0.0071137
chr6	64937802-64937803	0.736939	0.468767	0.268172	0.0997478	2.6885	0.00717731
chr6	122935481-122935482	0.927029	0.68771	0.239319	0.0825872	2.89777	0.00375828
chr6	38401432-38401433	0.711339	0.940028	-0.228689	0.0763926	-2.9936	0.00275706
chr6	110111502-110111503	0.941257	0.688757	0.2525	0.0905746	2.78776	0.0053074
chr6	145966892-145966893	0.921185	0.680067	0.241118	0.0840178	2.86984	0.00410676
chr6	122563365-122563366	0.858049	0.585839	0.272211	0.102749	2.64927	0.00806658
chr6	39781715-39781716	0.0651656	0.289044	-0.223878	0.074117	-3.0206	0.00252272
chr6	108380245-108380246	0.895302	0.663591	0.231711	0.0790097	2.93269	0.00336042
chr6	66728253-66728254	0.867423	0.501515	0.365908	0.161383	2.26733	0.0233702
chr6	85920374-85920375	0.479898	0.728869	-0.24897	0.0895229	-2.78108	0.00541788
chr6	96319659-96319660	0.438175	0.706614	-0.26844	0.101671	-2.64027	0.00828392
chr6	38242809-38242810	0.552928	0.290533	0.262395	0.0982416	2.67092	0.00756443
chr6	125060909-125060910	0.93571	0.677413	0.258297	0.096083	2.68826	0.00718247
chr6	134757563-134757564	0.321868	0.59543	-0.273561	0.105412	-2.59515	0.00945485
chr6	66568768-66568769	0.977819	0.600638	0.37718	0.170757	2.20887	0.0271837
chr7	37077621-37077622	0.0111398	0.862248	-0.851108	0.0676289	-12.585	2.55444e-36
chr7	37202351-37202352	0.0120318	0.824982	-0.81295	0.0803742	-10.1146	4.76123e-24
chr7	37244780-37244781	0.0127114	0.783863	-0.771152	0.0786061	-9.81033	1.01631e-22
chr7	37301717-37301718	0.0154611	0.806677	-0.791215	0.0709498	-11.1518	7.02023e-29
chr7	37185685-37185686	0.0138214	0.717114	-0.703293	0.0839778	-8.37474	5.53442e-17
chr7	37320470-37320471	0.013545	0.596698	-0.583153	0.0806289	-7.23255	4.73993e-13
chr7	54382906-54382907	0.65813	0.105194	0.552936	0.0950594	5.81675	6.00033e-09
chr7	53257201-53257202	0.686928	0.108428	0.5785	0.105708	5.47262	4.43431e-08
chr7	53092920-53092921	0.644894	0.0818219	0.563072	0.108229	5.20259	1.96526e-07
chr7	53155343-53155344	0.714086	0.126807	0.587279	0.123267	4.76429	1.89524e-06
chr7	33481512-33481513	0.931013	0.467503	0.46351	0.0927008	5.00007	5.73107e-07
chr7	53496873-53496874	0.65367	0.125107	0.528564	0.10943	4.83015	1.36427e-06
chr7	34109669-34109670	0.980321	0.533573	0.446748	0.0974044	4.58653	4.50679e-06
chr7	66250338-66250339	0.705245	0.207909	0.497336	0.111663	4.4539	8.43237e-06
chr7	53065264-53065265	0.586822	0.113909	0.472913	0.110578	4.27673	1.89657e-05
chr7	54422286-54422287	0.763039	0.208682	0.554357	0.13587	4.08006	4.50245e-05
chr7	53211040-53211041	0.621606	0.136921	0.484686	0.115243	4.20576	2.60203e-05
chr7	52783283-52783284	0.636842	0.160206	0.476636	0.113908	4.18441	2.85907e-05
chr7	36675918-36675919	0.772905	0.312005	0.4609	0.109684	4.20206	2.64492e-05
chr7	53388715-53388716	0.695972	0.17033	0.525642	0.131772	3.98902	6.63455e-05
chr7	33497989-33497990	0.72688	0.318492	0.408388	0.0982913	4.15487	3.25474e-05
chr7	127649019-127649020	0.454667	0.0972137	0.357454	0.0823473	4.34081	1.4196e-05
chr7	16660215-16660216	0.644156	0.957387	-0.313231	0.0696292	-4.49855	6.84177e-06
chr7	66038383-66038384	0.786445	0.328342	0.458103	0.119581	3.83091	0.000127672
chr7	54449214-54449215	0.481594	0.0947077	0.386887	0.0967855	3.99736	6.40526e-05
chr7	37346502-37346503	0.0261637	0.345953	-0.319789	0.079408	-4.02717	5.64531e-05
chr7	50258111-50258112	0.788985	0.423078	0.365906	0.0968763	3.77705	0.000158699
chr7	39543999-39544000	0.793615	0.390351	0.403264	0.11246	3.58584	0.000335996
chr7	33648881-33648882	0.74012	0.381472	0.358648	0.100913	3.55403	0.000379382
chr7	66720446-66720447	0.532476	0.853566	-0.32109	0.0883099	-3.63595	0.000276963
chr7	53777900-53777901	0.552669	0.132236	0.420433	0.128466	3.27271	0.00106521
chr7	65958874-65958875	0.704658	0.333084	0.371574	0.10906	3.40707	0.000656643
chr7	65957172-65957173	0.30706	0.663413	-0.356353	0.103536	-3.44184	0.000577781
chr7	53284879-53284880	0.62223	0.179256	0.442974	0.139368	3.17846	0.0014806
chr7	115674652-115674653	0.578198	0.882728	-0.30453	0.0849542	-3.58464	0.00033754
chr7	126345081-126345082	0.348066	0.0484693	0.299597	0.084851	3.53086	0.000414214
chr7	34069366-34069367	0.712694	0.37484	0.337854	0.101303	3.33508	0.000852755
chr7	38195638-38195639	0.983529	0.726879	0.25665	0.0668891	3.83695	0.000124574
chr7	28496710-28496711	0.585093	0.903313	-0.31822	0.0936159	-3.39921	0.000675817
chr7	24841437-24841438	0.668895	0.945473	-0.276578	0.0773539	-3.57549	0.000349568
chr7	100740461-100740462	0.98462	0.708473	0.276147	0.0771856	3.5777	0.00034663
chr7	135044027-135044028	0.391119	0.719093	-0.327974	0.10013	-3.27549	0.00105481
chr7	140135687-140135688	0.724708	0.982811	-0.258103	0.0713548	-3.61719	0.000297824
chr7	59641915-59641916	0.506822	0.195016	0.311806	0.095665	3.25935	0.00111668
chr7	33556716-33556717	0.904621	0.594567	0.310054	0.0953036	3.25333	0.00114063
chr7	139122785-139122786	0.896845	0.587463	0.309382	0.0952121	3.2494	0.00115649
chr7	34233591-34233592	0.0127094	0.269726	-0.257016	0.072191	-3.56023	0.000370532
chr7	100962514-100962515	0.766272	0.452652	0.31362	0.0982973	3.19052	0.00142016
chr7	103146818-103146819	0.955103	0.656851	0.298253	0.0913559	3.26473	0.00109568
chr7	63916928-63916929	0.590501	0.883384	-0.292883	0.0890496	-3.28899	0.00100546
chr7	28049266-28049267	0.493939	0.825703	-0.331764	0.107453	-3.08753	0.00201829
chr7	53880462-53880463	0.431714	0.112988	0.318726	0.101469	3.14111	0.00168307
chr7	136430200-136430201	0.907003	0.613952	0.293051	0.0896754	3.26791	0.00108345
chr7	53340606-53340607	0.420013	0.111507	0.308506	0.0991688	3.11092	0.00186505
chr7	110570758-110570759	0.941081	0.674499	0.266582	0.0796014	3.34897	0.000811139
chr7	72738213-72738214	0.642574	0.920309	-0.277736	0.0855346	-3.24705	0.00116606
chr7	66720623-66720624	0.6357	0.906465	-0.270765	0.0826335	-3.2767	0.00105029
chr7	53345142-53345143	0.743121	0.436016	0.307105	0.101315	3.03119	0.0024359
chr7	34189004-34189005	0.945356	0.658721	0.286635	0.0914531	3.13423	0.00172306
chr7	78493496-78493497	0.651159	0.324703	0.326455	0.111936	2.91645	0.00354041
chr7	123878564-123878565	0.899632	0.619241	0.280391	0.0892239	3.14255	0.00167481
chr7	116784829-116784830	0.872781	0.579958	0.292823	0.0957394	3.05854	0.00222418
chr7	30000967-30000968	0.304336	0.605096	-0.30076	0.100355	-2.99695	0.00272691
chr7	142895737-142895738	0.763518	0.442197	0.321322	0.110815	2.89963	0.00373601
chr7	96374142-96374143	0.98194	0.745092	0.236848	0.0685628	3.45447	0.000551377
chr7	55936768-55936769	0.451152	0.73896	-0.287807	0.0944214	-3.04812	0.00230279
chr7	33934848-33934849	0.906851	0.546922	0.359929	0.13289	2.70847	0.00675945
chr7	33395871-33395872	0.72914	0.447978	0.281162	0.0924416	3.04151	0.00235393
chr7	68280582-68280583	0.33477	0.627831	-0.293061	0.098701	-2.96918	0.00298597
chr7	12949974-12949975	0.106797	0.47638	-0.369584	0.138374	-2.6709	0.00756477
chr7	115674187-115674188	0.214604	0.491108	-0.276504	0.0906076	-3.05166	0.00227576
chr7	100058177-100058178	0.474741	0.771094	-0.296353	0.101319	-2.92496	0.00344499
chr7	126850739-126850740	0.802287	0.49823	0.304057	0.106765	2.84791	0.00440073
chr7	3106899-3106900	0.549542	0.242329	0.307213	0.110121	2.78978	0.0052744
chr7	101319353-101319354	0.648331	0.910742	-0.262411	0.0863972	-3.03726	0.00238737
chr7	135392322-135392323	0.603595	0.862858	-0.259263	0.0847888	-3.05775	0.00223007
chr7	25402040-25402041	0.539902	0.831671	-0.29177	0.102408	-2.84908	0.00438454
chr7	127717411-127717412	0.970392	0.695856	0.274536	0.0933295	2.94158	0.00326544
chr7	33632791-33632792	0.59578	0.30815	0.28763	0.100464	2.86301	0.00419636
chr7	62680625-62680626	0.648371	0.360207	0.288164	0.101193	2.84766	0.00440418
chr7	54586936-54586937	0.714967	0.432385	0.282582	0.0985758	2.86665	0.00414845
chr7	50519709-50519710	0.819759	0.55106	0.268699	0.0912189	2.94565	0.00322274
chr7	79605067-79605068	0.710541	0.960334	-0.249793	0.0810009	-3.08383	0.00204355
chr7	33557518-33557519	0.698332	0.950571	-0.252239	0.0823907	-3.0615	0.00220233
chr7	12949999-12950000	0.0518112	0.402216	-0.350405	0.136254	-2.57171	0.0101198
chr7	6937329-6937330	0.246893	0.0157937	0.231099	0.0715476	3.23001	0.00123788
chr7	28466488-28466489	0.70778	0.968533	-0.260753	0.0878763	-2.96727	0.00300455
chr7	82612401-82612402	0.917014	0.650455	0.266559	0.091121	2.92533	0.00344091
chr7	26175431-26175432	0.685248	0.391446	0.293802	0.106158	2.76759	0.00564716
chr7	144014026-144014027	0.797828	0.518754	0.279074	0.0980935	2.84498	0.00444143
chr7	12949611-12949612	0.0126934	0.328833	-0.31614	0.119089	-2.65464	0.00793922
chr7	25339880-25339881	0.956643	0.718556	0.238088	0.0763485	3.11843	0.00181817
chr7	12949941-12949942	0.042455	0.387615	-0.34516	0.136074	-2.53656	0.0111947
chr7	128074161-128074162	0.825229	0.542885	0.282344	0.101645	2.77775	0.00547373
chr7	33548167-33548168	0.886972	0.620481	0.266491	0.0932622	2.85744	0.00427076
chr7	81029611-81029612	0.646381	0.933087	-0.286707	0.105475	-2.71824	0.00656304
chr7	91083286-91083287	0.947777	0.667587	0.28019	0.102246	2.74034	0.00613753
chr7	55501555-55501556	0.694609	0.945855	-0.251246	0.0859204	-2.92417	0.00345374
chr7	19358741-19358742	0.622654	0.326364	0.29629	0.11166	2.65351	0.00796597
chr7	92784155-92784156	0.44757	0.164633	0.282937	0.104445	2.70894	0.00674979
chr7	33545225-33545226	0.591264	0.285774	0.30549	0.117648	2.59665	0.00941386
chr7	34660322-34660323	0.218173	0.505485	-0.287312	0.107742	-2.66667	0.00766077
chr7	45064706-45064707	0.794577	0.996565	-0.201988	0.059055	-3.42035	0.000625412
chr7	59612773-59612774	0.835435	0.55123	0.284206	0.106896	2.65871	0.00784411
chr7	80379710-80379711	0.810104	0.529028	0.281076	0.105087	2.6747	0.00747964
chr7	39797269-39797270	0.73028	0.976075	-0.245795	0.0848539	-2.89668	0.00377135
chr7	83627800-83627801	0.711941	0.43558	0.276362	0.102729	2.6902	0.00714096
chr7	120157824-120157825	0.925518	0.692512	0.233006	0.0774738	3.00755	0.00263362
chr7	56242196-56242197	0.655627	0.386165	0.269463	0.100425	2.68322	0.00729172
chr7	101346004-101346005	0.581665	0.849922	-0.268257	0.0999263	-2.68455	0.0072628
chr7	57408899-57408900	0.923178	0.679864	0.243315	0.0851319	2.85809	0.00426193
chr7	111283424-111283425	0.892496	0.635603	0.256893	0.0934489	2.74902	0.00597739
chr7	5166992-5166993	0.867355	0.605131	0.262223	0.0967223	2.7111	0.00670614
chr7	60901919-60901920	0.623143	0.360179	0.262964	0.0976196	2.69377	0.00706497
chr7	58062296-58062297	0.919785	0.641095	0.27869	0.107245	2.59862	0.00935992
chr7	75205538-75205539	0.996813	0.789048	0.207765	0.0648733	3.20264	0.00136176
chr7	143833521-143833522	0.325511	0.600131	-0.27462	0.105446	-2.60438	0.00920415
chr7	66797101-66797102	0.767681	0.518172	0.249509	0.0903619	2.76122	0.00575865
chr7	118828035-118828036	0.425654	0.165346	0.260308	0.096998	2.68364	0.00728246
chr7	75823092-75823093	0.863227	0.594597	0.26863	0.102105	2.63092	0.00851533
chr7	36644085-36644086	0.768444	0.981632	-0.213188	0.0685269	-3.11102	0.00186445
chr7	107633188-107633189	0.755442	0.972114	-0.216672	0.0706965	-3.06482	0.00217801
chr7	23641896-23641897	0.623912	0.351146	0.272766	0.105014	2.59742	0.00939266
chr7	144898722-144898723	0.952704	0.672978	0.279726	0.109293	2.55941	0.0104851
chr8	28090727-28090728	0.0624899	0.789471	-0.726981	0.0684208	-10.6251	2.27664e-26
chr8	28093640-28093641	0.0509535	0.921346	-0.870392	0.052253	-16.6573	2.67962e-62
chr8	28110838-28110839	0.103889	0.852522	-0.748633	0.0767277	-9.75701	1.72155e-22
chr8	28521840-28521841	0.10164	0.864967	-0.763327	0.0720157	-10.5994	2.99755e-26
chr8	28642132-28642133	0.115402	0.910151	-0.794749	0.0728502	-10.9094	1.03996e-27
chr8	28718248-28718249	0.0664821	0.769901	-0.703419	0.0689454	-10.2025	1.93137e-24
chr8	28724152-28724153	0.0788289	0.804032	-0.725204	0.0727927	-9.96259	2.222e-23
chr8	28915243-28915244	0.108983	0.957945	-0.848962	0.0565395	-15.0154	5.82229e-51
chr8	28926447-28926448	0.118354	0.8783	-0.759946	0.0768609	-9.88729	4.72643e-23
chr8	29162743-29162744	0.0795717	0.839716	-0.760144	0.0695322	-10.9323	8.08069e-28
chr8	28925438-28925439	0.151472	0.900487	-0.749015	0.0821346	-9.11936	7.55699e-20
chr8	29365993-29365994	0.070727	0.740645	-0.669918	0.0721492	-9.28518	1.61439e-20
chr8	29464974-29464975	0.04852	0.668021	-0.619501	0.0721802	-8.58271	9.26658e-18
chr8	29011354-29011355	0.147351	0.815673	-0.668322	0.081535	-8.19674	2.4699e-16
chr8	29479496-29479497	0.0899613	0.725557	-0.635596	0.0780087	-8.14775	3.70746e-16
chr8	29459895-29459896	0.110145	0.766593	-0.656448	0.0874684	-7.50497	6.14412e-14
chr8	29153805-29153806	0.0731187	0.681375	-0.608256	0.0801411	-7.58982	3.20353e-14
chr8	28918307-28918308	0.0876319	0.693153	-0.605521	0.082076	-7.37757	1.61206e-13
chr8	29074136-29074137	0.800894	0.333468	0.467425	0.0862003	5.42255	5.87561e-08
chr8	28416266-28416267	0.370469	0.870567	-0.500098	0.096691	-5.17213	2.31444e-07
chr8	29343714-29343715	0.111018	0.571554	-0.460536	0.0907598	-5.07423	3.8907e-07
chr8	29350089-29350090	0.421218	0.84358	-0.422362	0.0925175	-4.56521	4.98995e-06
chr8	57498676-57498677	0.198213	0.597733	-0.399521	0.0920178	-4.34178	1.41336e-05
chr8	25750974-25750975	0.339783	0.718431	-0.378648	0.086141	-4.39568	1.10429e-05
chr8	28937637-28937638	0.462375	0.832734	-0.370358	0.0841978	-4.39867	1.08916e-05
chr8	28236879-28236880	0.609163	0.967905	-0.358742	0.081412	-4.4065	1.05052e-05
chr8	28541758-28541759	0.681327	0.296517	0.38481	0.0925478	4.15796	3.21099e-05
chr8	18463178-18463179	0.0897365	0.760795	-0.671059	0.188079	-3.56795	0.000359781
chr8	91631677-91631678	0.41653	0.789736	-0.373207	0.0898775	-4.15239	3.29019e-05
chr8	29224096-29224097	0.554535	0.185077	0.369458	0.0915183	4.03698	5.41426e-05
chr8	29544442-29544443	0.462217	0.828673	-0.366456	0.0906686	-4.04171	5.3063e-05
chr8	25751011-25751012	0.443461	0.805067	-0.361606	0.0901048	-4.01317	5.99086e-05
chr8	81636822-81636823	0.838843	0.486861	0.351982	0.0902604	3.89963	9.63417e-05
chr8	109408115-109408116	0.510616	0.142329	0.368287	0.0970203	3.79598	0.00014706
chr8	35345025-35345026	0.83726	0.469517	0.367743	0.097375	3.77657	0.000159004
chr8	56281912-56281913	0.376542	0.716057	-0.339515	0.0873957	-3.8848	0.000102413
chr8	46388645-46388646	0.170686	0.554497	-0.383811	0.104259	-3.68133	0.000232025
chr8	22381814-22381815	0.6252	0.95605	-0.33085	0.0861311	-3.84123	0.000122417
chr8	29457889-29457890	0.512379	0.844737	-0.332358	0.0894809	-3.71429	0.000203771
chr8	44569873-44569874	0.722721	0.369755	0.352967	0.0991054	3.56153	0.000368704
chr8	29015111-29015112	0.22551	0.595965	-0.370455	0.106214	-3.4878	0.000487004
chr8	56953049-56953050	0.933534	0.570204	0.363331	0.106873	3.39964	0.000674741
chr8	28792210-28792211	0.523605	0.831989	-0.308385	0.0855633	-3.60417	0.00031315
chr8	57498754-57498755	0.146099	0.478553	-0.332454	0.0961124	-3.45901	0.000542172
chr8	56252176-56252177	0.929442	0.59395	0.335492	0.0980503	3.42163	0.000622464
chr8	28971382-28971383	0.597136	0.902978	-0.305841	0.0861293	-3.55095	0.000383838
chr8	19999304-19999305	0.731428	0.413995	0.317433	0.0911201	3.48367	0.000494584
chr8	61347765-61347766	0.133041	0.477666	-0.344625	0.102685	-3.35612	0.00079043
chr8	93599536-93599537	0.849406	0.519957	0.329449	0.0983946	3.34824	0.000813255
chr8	29287807-29287808	0.746667	0.421754	0.324913	0.0976889	3.32599	0.000881036
chr8	28271606-28271607	0.585248	0.885195	-0.299946	0.0879698	-3.40965	0.000650462
chr8	120384460-120384461	0.310991	0.654931	-0.343939	0.107805	-3.19039	0.00142082
chr8	88095883-88095884	0.643045	0.932157	-0.289111	0.0838599	-3.44755	0.000565692
chr8	32933414-32933415	0.554822	0.849725	-0.294903	0.0866326	-3.40406	0.000663912
chr8	58285576-58285577	0.526254	0.821987	-0.295733	0.089959	-3.28741	0.00101112
chr8	95804188-95804189	0.689003	0.947827	-0.258824	0.0737011	-3.5118	0.000445077
chr8	119993828-119993829	0.822626	0.484031	0.338595	0.111423	3.03883	0.002375
chr8	28418865-28418866	0.878519	0.597531	0.280988	0.0849479	3.30777	0.000940428
chr8	87513711-87513712	0.34575	0.66973	-0.323979	0.10535	-3.07527	0.00210312
chr8	77402755-77402756	0.429689	0.729437	-0.299747	0.0957768	-3.12964	0.00175018
chr8	58483590-58483591	0.476862	0.188198	0.288664	0.0915861	3.15183	0.0016225
chr8	33880503-33880504	0.896087	0.616014	0.280073	0.0878895	3.18665	0.00143933
chr8	23088230-23088231	0.556411	0.872659	-0.316248	0.105655	-2.99322	0.00276052
chr8	122662409-122662410	0.605397	0.898735	-0.293338	0.0950049	-3.08761	0.00201774
chr8	29601240-29601241	0.642308	0.348722	0.293587	0.0958683	3.0624	0.00219571
chr8	109963093-109963094	0.75871	0.452187	0.306523	0.102512	2.99012	0.00278872
chr8	93385014-93385015	0.49878	0.792136	-0.293356	0.0960068	-3.05557	0.0022463
chr8	28716608-28716609	0.942017	0.696463	0.245554	0.0723122	3.39575	0.000684409
chr8	34995183-34995184	0.965495	0.719713	0.245782	0.0727215	3.37977	0.000725464
chr8	35730815-35730816	0.200002	0.515122	-0.31512	0.107513	-2.93099	0.00337885
chr8	58369750-58369751	0.900571	0.608623	0.291948	0.0963882	3.02888	0.00245466
chr8	87795849-87795850	0.23036	0.538556	-0.308196	0.104603	-2.94634	0.0032156
chr8	20874610-20874611	0.25354	0.559551	-0.306012	0.103867	-2.9462	0.00321707
chr8	34455510-34455511	0.889644	0.562823	0.326821	0.115278	2.83506	0.00458172
chr8	116466517-116466518	0.503048	0.791191	-0.288143	0.0965729	-2.98368	0.00284804
chr8	17557514-17557515	0.898452	0.646379	0.252073	0.079273	3.17981	0.00147371
chr8	115153918-115153919	0.995867	0.725455	0.270412	0.0888883	3.04216	0.00234888
chr8	90636406-90636407	0.712894	0.417341	0.295553	0.102464	2.88446	0.00392088
chr8	86339155-86339156	0.982185	0.742649	0.239536	0.0732669	3.26936	0.0010779
chr8	6538504-6538505	0.694892	0.418446	0.276446	0.0928413	2.97762	0.00290497
chr8	114092527-114092528	0.30223	0.590459	-0.28823	0.0991033	-2.90837	0.00363313
chr8	33041955-33041956	0.693166	0.410389	0.282777	0.0965171	2.92981	0.00339168
chr8	51450795-51450796	0.831022	0.560951	0.270072	0.0908963	2.9712	0.00296635
chr8	33603223-33603224	0.747748	0.980257	-0.232509	0.0714818	-3.2527	0.00114314
chr8	77784046-77784047	0.921479	0.68519	0.236289	0.0736793	3.207	0.00134128
chr8	35344967-35344968	0.673183	0.358777	0.314406	0.116237	2.70487	0.0068332
chr8	3455122-3455123	0.694024	0.946985	-0.252961	0.0834386	-3.0317	0.0024318
chr8	31900790-31900791	0.903602	0.666921	0.236681	0.07458	3.17352	0.00150605
chr8	105076413-105076414	0.508242	0.791265	-0.283023	0.0999628	-2.83128	0.00463622
chr8	114145428-114145429	0.310848	0.591039	-0.280192	0.098671	-2.83966	0.00451623
chr8	3159200-3159201	0.675178	0.922946	-0.247768	0.0811141	-3.05456	0.00225389
chr8	110208428-110208429	0.846544	0.559441	0.287103	0.102908	2.78989	0.00527258
chr8	24398811-24398812	0.782586	0.506148	0.276438	0.0974107	2.83786	0.00454171
chr8	103493301-103493302	0.83412	0.568531	0.265588	0.0915777	2.90014	0.00372992
chr8	86533503-86533504	0.262113	0.549438	-0.287325	0.103669	-2.77155	0.00557897
chr8	16377902-16377903	0.506159	0.771911	-0.265751	0.0919067	-2.89153	0.00383367
chr8	81594235-81594236	0.809677	0.541134	0.268544	0.0935778	2.86974	0.00410815
chr8	14169381-14169382	0.651359	0.888871	-0.237513	0.0765423	-3.10303	0.00191553
chr8	43067445-43067446	0.838982	0.556437	0.282544	0.101951	2.77137	0.00558213
chr8	120046423-120046424	0.640571	0.340319	0.300252	0.11249	2.66915	0.00760442
chr8	22381746-22381747	0.584364	0.85363	-0.269266	0.0954748	-2.82029	0.00479809
chr8	114283424-114283425	0.496008	0.762231	-0.266222	0.0938086	-2.83793	0.00454067
chr8	61752167-61752168	0.679775	0.91712	-0.237345	0.0776274	-3.05749	0.00223198
chr8	70628593-70628594	0.744795	0.966998	-0.222203	0.0692608	-3.20821	0.00133564
chr8	20004871-20004872	0.941551	0.7271	0.214451	0.0648886	3.30492	0.000950047
chr8	28054317-28054318	0.255236	0.515517	-0.260281	0.090934	-2.86231	0.0042057
chr8	29603915-29603916	0.83573	0.566292	0.269439	0.0961659	2.80181	0.00508168
chr8	110808472-110808473	0.83461	0.566435	0.268175	0.0955431	2.80685	0.00500289
chr8	56234173-56234174	0.887186	0.64813	0.239056	0.0790879	3.02266	0.00250561
chr8	33867092-33867093	0.641414	0.909357	-0.267944	0.0959497	-2.79254	0.00522954
chr8	64747237-64747238	0.294773	0.564713	-0.26994	0.0972093	-2.7769	0.00548809
chr8	114522063-114522064	0.762872	0.996247	-0.233375	0.0766228	-3.04576	0.00232093
chr8	82673636-82673637	0.732313	0.957998	-0.225685	0.0723543	-3.11917	0.00181364
chr8	48039658-48039659	0.651264	0.896693	-0.245429	0.0839272	-2.92431	0.00345225
chr8	114582866-114582867	0.349482	0.626556	-0.277073	0.102437	-2.70482	0.00683418
chr8	57498764-57498765	0.239452	0.514985	-0.275532	0.10164	-2.71085	0.00671103
chr8	102413128-102413129	0.888673	0.647991	0.240682	0.0817409	2.94444	0.00323535
chr8	104695393-104695394	0.996667	0.748049	0.248618	0.0867839	2.86479	0.00417279
chr8	9937219-9937220	0.982067	0.772985	0.209082	0.0640362	3.26506	0.00109441
chr8	8449017-8449018	0.642053	0.882101	-0.240048	0.082429	-2.91218	0.0035892
chr8	45378121-45378122	0.86744	0.619197	0.248242	0.0873932	2.84052	0.00450401
chr8	29444087-29444088	0.013313	0.223784	-0.210471	0.0657686	-3.20018	0.00137341
chr8	103820381-103820382	0.786572	0.508279	0.278293	0.106443	2.61448	0.00893636
chr8	45507920-45507921	0.211752	0.475945	-0.264193	0.0981089	-2.69285	0.00708433
chr8	46753225-46753226	0.870333	0.633704	0.236629	0.0815985	2.89992	0.00373259
chr8	123976662-123976663	0.542888	0.823981	-0.281093	0.108315	-2.59515	0.00945508
chr8	94365907-94365908	0.975696	0.7419	0.233796	0.0801047	2.91863	0.00351569
chr8	120770668-120770669	0.51179	0.78673	-0.27494	0.105256	-2.6121	0.00899868
chr8	107830397-107830398	0.620618	0.872474	-0.251856	0.0913348	-2.75751	0.00582441
chr8	34442072-34442073	0.297238	0.570048	-0.272809	0.104093	-2.62081	0.00877208
chr8	4021855-4021856	0.828559	0.541351	0.287208	0.113769	2.52448	0.011587
chr8	18095533-18095534	0.786209	0.546275	0.239934	0.0849781	2.82348	0.00475047
chr8	105268437-105268438	0.716944	0.953349	-0.236405	0.0828997	-2.8517	0.00434862
chr9	51840269-51840270	0.176544	0.781822	-0.605278	0.104268	-5.80503	6.43543e-09
chr9	51808021-51808022	0.192487	0.839815	-0.647328	0.122259	-5.29473	1.19195e-07
chr9	51808319-51808320	0.428013	0.954113	-0.5261	0.095207	-5.52585	3.27891e-08
chr9	85228813-85228814	0.605243	0.967348	-0.362105	0.0836264	-4.33003	1.49091e-05
chr9	76108710-76108711	0.452805	0.832885	-0.38008	0.0929011	-4.09123	4.29087e-05
chr9	114028080-114028081	0.613372	0.96488	-0.351509	0.0895953	-3.92329	8.73465e-05
chr9	61266995-61266996	0.382572	0.775028	-0.392457	0.107223	-3.6602	0.000252022
chr9	48467442-48467443	0.936427	0.373865	0.562561	0.171732	3.2758	0.00105362
chr9	81555472-81555473	0.596996	0.910203	-0.313207	0.0811599	-3.85913	0.000113793
chr9	76285012-76285013	0.439232	0.774871	-0.335639	0.0921216	-3.64343	0.000269027
chr9	47520672-47520673	0.793417	0.453897	0.33952	0.0994312	3.41462	0.000638702
chr9	58051836-58051837	0.0347302	0.350528	-0.315798	0.093635	-3.37265	0.000744495
chr9	52323086-52323087	0.110177	0.422009	-0.311832	0.0922008	-3.38209	0.000719353
chr9	64359777-64359778	0.728168	0.996637	-0.268469	0.0733366	-3.66078	0.000251452
chr9	4107257-4107258	0.311426	0.671815	-0.360389	0.113916	-3.16363	0.00155813
chr9	111569895-111569896	0.589954	0.887429	-0.297475	0.0889306	-3.34503	0.000822751
chr9	52136059-52136060	0.731197	0.403793	0.327404	0.106117	3.0853	0.00203345
chr9	88064942-88064943	0.672296	0.359718	0.312578	0.0997322	3.13418	0.00172337
chr9	10402012-10402013	0.858855	0.576261	0.282594	0.0859942	3.28619	0.00101551
chr9	73095620-73095621	0.605948	0.895191	-0.289243	0.0892322	-3.24146	0.00118918
chr9	111415335-111415336	0.683542	0.348646	0.334895	0.111266	3.00985	0.00261375
chr9	42790269-42790270	0.297775	0.610739	-0.312964	0.101179	-3.09315	0.00198041
chr9	94380126-94380127	0.516417	0.805978	-0.289561	0.0908156	-3.18845	0.00143036
chr9	38740022-38740023	0.84138	0.556087	0.285294	0.0893193	3.19409	0.00140274
chr9	103442264-103442265	0.638994	0.916618	-0.277624	0.0861777	-3.22153	0.00127509
chr9	52014504-52014505	0.465185	0.173908	0.291277	0.0931219	3.12791	0.00176053
chr9	64675125-64675126	0.84025	0.536761	0.303489	0.0999004	3.03791	0.00238222
chr9	66219492-66219493	0.788494	0.466032	0.322462	0.10974	2.93842	0.00329894
chr9	72023562-72023563	0.557941	0.831727	-0.273786	0.0861517	-3.17795	0.00148318
chr9	63892614-63892615	0.97989	0.729664	0.250226	0.0755604	3.3116	0.00092764
chr9	63327951-63327952	0.440879	0.727954	-0.287075	0.0944507	-3.03941	0.00237038
chr9	62678974-62678975	0.372964	0.0954372	0.277527	0.090033	3.0825	0.00205266
chr9	42948557-42948558	0.329241	0.644945	-0.315703	0.110409	-2.8594	0.00424443
chr9	60380789-60380790	0.72338	0.981576	-0.258196	0.0810171	-3.18693	0.0014379
chr9	70838400-70838401	0.971365	0.709516	0.261848	0.0829148	3.15804	0.00158834
chr9	72653214-72653215	0.302241	0.0252132	0.277028	0.0909262	3.04673	0.00231345
chr9	27215090-27215091	0.970162	0.714022	0.25614	0.0803585	3.18747	0.00143523
chr9	41105591-41105592	0.55329	0.845245	-0.291955	0.0988798	-2.95263	0.00315081
chr9	59996586-59996587	0.663355	0.927478	-0.264123	0.0848836	-3.11159	0.00186082
chr9	70083799-70083800	0.534242	0.822036	-0.287794	0.098396	-2.92485	0.00344621
chr9	102732040-102732041	0.594432	0.882502	-0.28807	0.0987762	-2.91639	0.00354107
chr9	45345265-45345266	0.650073	0.918775	-0.268702	0.0886653	-3.03051	0.00244137
chr9	66219537-66219538	0.741044	0.430499	0.310545	0.111263	2.79108	0.00525321
chr9	56784949-56784950	0.960487	0.694049	0.266439	0.0883002	3.01742	0.0025494
chr9	115272925-115272926	0.621479	0.886611	-0.265132	0.0880808	-3.0101	0.00261164
chr9	20293451-20293452	0.604192	0.326309	0.277883	0.0950914	2.92227	0.00347485
chr9	119076549-119076550	0.0556276	0.307719	-0.252091	0.0819095	-3.07768	0.0020862
chr9	5991147-5991148	0.837805	0.583875	0.25393	0.0829125	3.06263	0.00219403
chr9	114053208-114053209	0.203596	0.517933	-0.314337	0.115772	-2.71515	0.00662465
chr9	101282427-101282428	0.478257	0.220213	0.258044	0.0855937	3.01476	0.00257186
chr9	44126360-44126361	0.368426	0.110244	0.258183	0.0857047	3.01247	0.00259133
chr9	66219376-66219377	0.579707	0.274978	0.304728	0.111311	2.73762	0.0061886
chr9	40709954-40709955	0.443435	0.755538	-0.312103	0.115421	-2.70405	0.00684998
chr9	114110190-114110191	0.709112	0.949777	-0.240665	0.0765071	-3.14566	0.00165712
chr9	5634856-5634857	0.657071	0.368295	0.288776	0.102909	2.80613	0.00501411
chr9	69753225-69753226	0.574739	0.272769	0.30197	0.110447	2.73407	0.00625568
chr9	103923847-103923848	0.784416	0.997092	-0.212677	0.0616821	-3.44795	0.000564866
chr9	24956830-24956831	0.721483	0.956761	-0.235278	0.0741252	-3.17406	0.00150321
chr9	38368162-38368163	0.554499	0.820785	-0.266286	0.0911811	-2.92041	0.00349568
chr9	61201411-61201412	0.47241	0.752786	-0.280376	0.099141	-2.82805	0.00468325
chr9	45149849-45149850	0.846667	0.57605	0.270617	0.0939097	2.88167	0.00395576
chr9	48749280-48749281	0.0803879	0.352389	-0.272001	0.0948682	-2.86715	0.00414189
chr9	65835343-65835344	0.181578	0.453304	-0.271726	0.0950926	-2.85749	0.0042701
chr9	21614874-21614875	0.518923	0.793146	-0.274223	0.0966244	-2.83803	0.00453933
chr9	25643442-25643443	0.892159	0.615529	0.27663	0.0981104	2.81958	0.00480866
chr9	72768759-72768760	0.765432	0.997331	-0.231899	0.0735754	-3.15186	0.00162236
chr9	116105056-116105057	0.974517	0.722724	0.251793	0.0856019	2.94144	0.00326692
chr9	57529066-57529067	0.694255	0.927816	-0.23356	0.0753838	-3.09828	0.00194648
chr9	87775435-87775436	0.563515	0.82721	-0.263694	0.0926233	-2.84695	0.00441397
chr9	46647498-46647499	0.880507	0.612056	0.268451	0.0954745	2.81176	0.00492718
chr9	28563163-28563164	0.469817	0.209461	0.260356	0.091223	2.85406	0.00431642
chr9	31449888-31449889	0.534425	0.805624	-0.271199	0.0975531	-2.78001	0.0054357
chr9	96823479-96823480	0.306851	0.590894	-0.284043	0.10506	-2.70363	0.00685859
chr9	11104646-11104647	0.97981	0.733692	0.246118	0.0836813	2.94113	0.00327018
chr9	68445708-68445709	0.594015	0.849832	-0.255817	0.0893963	-2.86161	0.004215
chr9	37550117-37550118	0.99738	0.797455	0.199925	0.0575187	3.47582	0.000509292
chr9	66088637-66088638	0.304197	0.0581516	0.246046	0.0844617	2.9131	0.00357854
chr9	46947508-46947509	0.628902	0.355835	0.273067	0.100369	2.72063	0.00651572
chr9	48749305-48749306	0.0604955	0.3083	-0.247805	0.0858793	-2.8855	0.00390792
chr9	35424639-35424640	0.728011	0.95947	-0.231459	0.077168	-2.99942	0.00270493
chr9	46280493-46280494	0.432187	0.160305	0.271882	0.101064	2.6902	0.00714092
chr9	92565504-92565505	0.723962	0.457992	0.26597	0.0975915	2.72534	0.00642354
chr9	63161578-63161579	0.845069	0.577845	0.267223	0.0983856	2.71608	0.00660601
chr9	77537217-77537218	0.87491	0.62214	0.25277	0.0898562	2.81305	0.0049074
chr9	48481372-48481373	0.460443	0.196452	0.263992	0.0965935	2.73301	0.00627575
chr9	53934464-53934465	0.518237	0.786138	-0.267901	0.0993167	-2.69744	0.00698755
chr9	95826028-95826029	0.853314	0.609877	0.243438	0.0853089	2.85361	0.0043226
chr9	54148768-54148769	0.815479	0.564906	0.250573	0.0901732	2.77879	0.0054561
chr9	65759965-65759966	0.554088	0.809735	-0.255646	0.0933985	-2.73716	0.00619724
chr9	70322703-70322704	0.490604	0.758594	-0.26799	0.100896	-2.6561	0.00790504
chr9	119106166-119106167	0.866618	0.612157	0.254462	0.0930182	2.73561	0.00622649
chr9	21652897-21652898	0.546417	0.797865	-0.251448	0.0912898	-2.75439	0.00588016
chr9	120589194-120589195	0.808373	0.538548	0.269825	0.102495	2.63258	0.00847395
chr9	60531583-60531584	0.86018	0.591631	0.268549	0.102334	2.62425	0.00868395
chr10	55174401-55174402	0.0160448	0.673387	-0.657342	0.0721217	-9.11434	7.91537e-20
chr10	54756049-54756050	0.0126283	0.482773	-0.470145	0.0717418	-6.55329	5.62812e-11
chr10	54530222-54530223	0.0879554	0.586957	-0.499001	0.081909	-6.09214	1.1141e-09
chr10	55205693-55205694	0.0112252	0.432731	-0.421506	0.0705266	-5.97656	2.27902e-09
chr10	55197993-55197994	0.0107854	0.442383	-0.431597	0.0731058	-5.90374	3.5536e-09
chr10	55180418-55180419	0.0120893	0.427364	-0.415275	0.0748819	-5.54573	2.9273e-08
chr10	55083494-55083495	0.0114563	0.448791	-0.437335	0.0822122	-5.31958	1.04004e-07
chr10	54545003-54545004	0.0181247	0.364489	-0.346364	0.0653048	-5.3038	1.13414e-07
chr10	123451409-123451410	0.800727	0.161868	0.638859	0.147116	4.34255	1.40841e-05
chr10	55196869-55196870	0.0121379	0.383679	-0.371542	0.0747253	-4.9721	6.62315e-07
chr10	108178607-108178608	0.229433	0.646083	-0.41665	0.0961599	-4.33289	1.47164e-05
chr10	55234153-55234154	0.0111109	0.31928	-0.308169	0.0654175	-4.71081	2.46737e-06
chr10	58433748-58433749	0.0223787	0.501161	-0.478782	0.12356	-3.87491	0.000106665
chr10	100152983-100152984	0.664353	0.981466	-0.317113	0.0760015	-4.17246	3.01328e-05
chr10	42722320-42722321	0.466146	0.818177	-0.352031	0.0894038	-3.93754	8.23226e-05
chr10	58628124-58628125	0.0126994	0.414263	-0.401564	0.108894	-3.68765	0.000226331
chr10	99891721-99891722	0.885643	0.555037	0.330606	0.0845407	3.91061	9.20621e-05
chr10	125917824-125917825	0.22813	0.596753	-0.368623	0.102358	-3.60131	0.000316613
chr10	53024565-53024566	0.333975	0.664829	-0.330854	0.0916929	-3.60828	0.00030823
chr10	99165904-99165905	0.760232	0.410945	0.349287	0.0994616	3.51178	0.000445119
chr10	99882190-99882191	0.758561	0.428865	0.329695	0.0926033	3.5603	0.000370435
chr10	115511848-115511849	0.283233	0.634669	-0.351436	0.101639	-3.45768	0.000544839
chr10	95223648-95223649	0.959408	0.65497	0.304439	0.0864852	3.52012	0.000431349
chr10	58880842-58880843	0.0124645	0.426293	-0.413828	0.133107	-3.10898	0.00187736
chr10	91261163-91261164	0.788547	0.4586	0.329947	0.0990226	3.33203	0.000862138
chr10	114600684-114600685	0.628287	0.288436	0.339851	0.104081	3.26527	0.00109359
chr10	100588609-100588610	0.413801	0.123922	0.289879	0.0831495	3.48624	0.000489856
chr10	20616981-20616982	0.65621	0.92154	-0.265331	0.0737882	-3.59584	0.000323342
chr10	127582518-127582519	0.578421	0.885095	-0.306674	0.0942198	-3.25487	0.00113442
chr10	11080584-11080585	0.354908	0.0612729	0.293635	0.0889784	3.30007	0.000966597
chr10	120760605-120760606	0.547407	0.851705	-0.304298	0.09429	-3.22726	0.00124981
chr10	62533430-62533431	0.624813	0.910715	-0.285902	0.0860956	-3.32075	0.000897746
chr10	100749438-100749439	0.567446	0.859983	-0.292537	0.0895888	-3.26533	0.00109337
chr10	121771215-121771216	0.766429	0.437163	0.329266	0.106736	3.08486	0.0020365
chr10	62527134-62527135	0.844519	0.419967	0.424553	0.153405	2.76753	0.00564829
chr10	101137301-101137302	0.268403	0.568971	-0.300568	0.0945724	-3.17818	0.00148202
chr10	45071146-45071147	0.151887	0.459641	-0.307755	0.0980163	-3.13983	0.00169046
chr10	61448775-61448776	0.580334	0.881508	-0.301173	0.0954014	-3.15691	0.00159452
chr10	63222574-63222575	0.752058	0.372696	0.379362	0.132787	2.85692	0.0042777
chr10	26630146-26630147	0.51758	0.80119	-0.28361	0.0878514	-3.22829	0.00124531
chr10	45190314-45190315	0.567893	0.85671	-0.288818	0.0905629	-3.18914	0.00142699
chr10	128155512-128155513	0.737643	0.978416	-0.240773	0.0679017	-3.54591	0.000391257
chr10	91143307-91143308	0.823068	0.520717	0.302351	0.0979091	3.08808	0.00201454
chr10	111936765-111936766	0.673717	0.359652	0.314066	0.103794	3.02585	0.00247938
chr10	73121053-73121054	0.670816	0.374938	0.295878	0.0954954	3.09835	0.00194601
chr10	21074399-21074400	0.606294	0.874431	-0.268137	0.083818	-3.19904	0.00137886
chr10	19629177-19629178	0.7066	0.974849	-0.268249	0.084254	-3.18381	0.0014535
chr10	60801747-60801748	0.817815	0.508334	0.309481	0.105213	2.94148	0.00326644
chr10	116748924-116748925	0.653813	0.357211	0.296602	0.0988672	3	0.0026998
chr10	69926989-69926990	0.163501	0.450024	-0.286522	0.0942935	-3.03862	0.00237665
chr10	67793114-67793115	0.639285	0.920315	-0.28103	0.0917363	-3.06345	0.00218797
chr10	62384246-62384247	0.960876	0.531571	0.429305	0.168174	2.55274	0.0106879
chr10	34445869-34445870	0.796328	0.524438	0.27189	0.0875183	3.10666	0.00189211
chr10	94796506-94796507	0.477313	0.761647	-0.284334	0.094932	-2.99513	0.00274325
chr10	44925221-44925222	0.908721	0.593361	0.31536	0.111449	2.82964	0.00466011
chr10	98930734-98930735	0.504179	0.796941	-0.292762	0.1003	-2.91887	0.00351302
chr10	122810328-122810329	0.548674	0.83654	-0.287866	0.0980546	-2.93578	0.00332712
chr10	60658706-60658707	0.997354	0.756506	0.240848	0.0742598	3.24331	0.00118149
chr10	75605573-75605574	0.698449	0.936822	-0.238373	0.0731462	-3.25886	0.00111861
chr10	80197029-80197030	0.995501	0.740612	0.25489	0.0821083	3.10431	0.00190723
chr10	56585287-56585288	0.910852	0.641004	0.269848	0.0901651	2.99282	0.00276412
chr10	99510518-99510519	0.821906	0.53964	0.282266	0.0974307	2.89709	0.0037664
chr10	6939141-6939142	0.738856	0.997198	-0.258342	0.0850917	-3.03604	0.00239708
chr10	100604135-100604136	0.400685	0.680655	-0.27997	0.0968983	-2.88932	0.00386079
chr10	83833820-83833821	0.906113	0.636948	0.269164	0.0919637	2.92686	0.00342408
chr10	40283813-40283814	0.431231	0.157718	0.273513	0.095046	2.87769	0.00400594
chr10	62995237-62995238	0.969943	0.54075	0.429193	0.183009	2.3452	0.0190167
chr10	55088600-55088601	0.025157	0.244613	-0.219456	0.0655158	-3.34967	0.000809076
chr10	5636937-5636938	0.676446	0.914206	-0.23776	0.0757016	-3.14075	0.00168515
chr10	23049905-23049906	0.899207	0.653112	0.246096	0.0804697	3.05824	0.00222642
chr10	69216650-69216651	0.577254	0.843049	-0.265795	0.0915646	-2.90281	0.00369829
chr10	13793004-13793005	0.858305	0.600948	0.257358	0.0871855	2.95184	0.0031589
chr10	85517828-85517829	0.871756	0.600553	0.271203	0.0950478	2.85333	0.00432641
chr10	106957627-106957628	0.696202	0.424224	0.271977	0.0955298	2.84704	0.00441273
chr10	123159663-123159664	0.903786	0.664995	0.238791	0.0771233	3.09623	0.00195998
chr10	40244626-40244627	0.782479	0.997379	-0.2149	0.0642248	-3.34606	0.000819679
chr10	127356246-127356247	0.740531	0.968895	-0.228364	0.0720654	-3.16885	0.00153044
chr10	108598464-108598465	0.561347	0.846038	-0.28469	0.103921	-2.73948	0.0061536
chr10	52455918-52455919	0.855084	0.598711	0.256372	0.0879781	2.91405	0.00356775
chr10	109346316-109346317	0.778729	0.523972	0.254756	0.0874231	2.91406	0.0035676
chr10	56969143-56969144	0.399621	0.706598	-0.306978	0.117182	-2.61966	0.00880167
chr10	81172906-81172907	0.772031	0.494387	0.277645	0.100662	2.75818	0.00581248
chr10	85935555-85935556	0.927313	0.653296	0.274016	0.0987824	2.77394	0.00553823
chr10	108210176-108210177	0.878643	0.625909	0.252734	0.0867481	2.91342	0.00357488
chr10	45070645-45070646	0.23796	0.512609	-0.274649	0.0994312	-2.7622	0.00574125
chr10	114983282-114983283	0.890621	0.647067	0.243555	0.0821369	2.96523	0.00302458
chr10	125654001-125654002	0.997527	0.785325	0.212202	0.064386	3.29577	0.000981517
chr10	87243609-87243610	0.894336	0.643325	0.25101	0.0867717	2.89277	0.00381866
chr10	79017744-79017745	0.781141	0.516995	0.264146	0.0944341	2.79715	0.00515558
chr10	43432744-43432745	0.997601	0.729699	0.267903	0.0968441	2.76633	0.00566907
chr10	17299670-17299671	0.0298106	0.259644	-0.229833	0.0749695	-3.06569	0.0021717
chr10	125515130-125515131	0.545517	0.805613	-0.260096	0.0930012	-2.79669	0.00516284
chr10	44256943-44256944	0.84812	0.60086	0.24726	0.0860525	2.87336	0.00406134
chr10	128219389-128219390	0.972523	0.733273	0.23925	0.0815358	2.9343	0.00334303
chr10	102981213-102981214	0.561707	0.307191	0.254516	0.0908248	2.80228	0.00507433
chr10	50762689-50762690	0.707598	0.443773	0.263825	0.0964798	2.73451	0.00624733
chr10	67111238-67111239	0.705292	0.426178	0.279114	0.105621	2.64261	0.00822699
chr10	115358385-115358386	0.20786	0.482939	-0.275079	0.103302	-2.66287	0.00774771
chr10	75617196-75617197	0.818664	0.57023	0.248434	0.0876452	2.83454	0.00458921
chr10	24258131-24258132	0.506257	0.769628	-0.263371	0.0965346	-2.72825	0.0063671
chr10	15710190-15710191	0.68805	0.916232	-0.228181	0.0757537	-3.01215	0.00259408
chr10	43662186-43662187	0.962793	0.670892	0.2919	0.113686	2.56761	0.0102403
chr10	36469705-36469706	0.639622	0.879403	-0.239781	0.0828253	-2.89503	0.00379126
chr10	60733302-60733303	0.932894	0.675948	0.256946	0.0934186	2.75048	0.00595085
chr10	91124781-91124782	0.832059	0.568338	0.263722	0.0975582	2.70322	0.00686709
chr10	15228228-15228229	0.980003	0.758433	0.22157	0.0724858	3.05674	0.00223758
chr10	119393484-119393485	0.94413	0.71528	0.22885	0.0769515	2.97395	0.00293992
chr10	58694924-58694925	0.0112293	0.250028	-0.238799	0.0829296	-2.87954	0.00398255
chr10	98554141-98554142	0.964568	0.742424	0.222144	0.0733151	3.02999	0.00244564
chr10	126663652-126663653	0.527587	0.256436	0.271151	0.102856	2.63622	0.00838357
chr10	118517720-118517721	0.855944	0.592765	0.263179	0.0983395	2.67623	0.00744553
chr10	89268008-89268009	0.856496	0.601209	0.255287	0.0936356	2.72639	0.00640322
chr10	118207156-118207157	0.997521	0.777608	0.219913	0.0723017	3.0416	0.00235327
chr11	85391396-85391397	0.377855	0.819631	-0.441776	0.100448	-4.39806	1.09223e-05
chr11	63483887-63483888	0.968417	0.4287	0.539718	0.131076	4.11759	3.82851e-05
chr11	60202237-60202238	0.978717	0.636853	0.341864	0.0787741	4.33981	1.42608e-05
chr11	85391372-85391373	0.404173	0.797803	-0.39363	0.100461	-3.91824	8.91964e-05
chr11	101340600-101340601	0.796465	0.35891	0.437554	0.116285	3.76279	0.000168027
chr11	95206393-95206394	0.847264	0.43482	0.412445	0.110942	3.71767	0.000201067
chr11	28143907-28143908	0.0113209	0.498689	-0.487368	0.138481	-3.51937	0.000432571
chr11	111141214-111141215	0.936776	0.591216	0.34556	0.0877555	3.93776	8.2245e-05
chr11	63500005-63500006	0.968206	0.448681	0.519525	0.150399	3.45431	0.000551696
chr11	63576217-63576218	0.980887	0.502968	0.477919	0.139367	3.4292	0.000605365
chr11	52087518-52087519	0.474786	0.820277	-0.345491	0.0911172	-3.79172	0.000149605
chr11	5732574-5732575	0.686855	0.99425	-0.307396	0.0812885	-3.78154	0.000155862
chr11	28213140-28213141	0.0129111	0.495022	-0.482111	0.150901	-3.19489	0.00139885
chr11	38410270-38410271	0.333071	0.66595	-0.332879	0.0968563	-3.43684	0.00058855
chr11	29318278-29318279	0.625944	0.281717	0.344227	0.101866	3.37923	0.000726903
chr11	3333661-3333662	0.96549	0.677989	0.287501	0.0814843	3.52829	0.000418249
chr11	63553931-63553932	0.917655	0.461903	0.455753	0.155302	2.93463	0.00333948
chr11	115587006-115587007	0.950566	0.615966	0.334599	0.102408	3.26732	0.00108572
chr11	78827228-78827229	0.6156	0.289357	0.326243	0.0988087	3.30177	0.000960779
chr11	120866246-120866247	0.94223	0.675583	0.266647	0.0737886	3.61365	0.000301913
chr11	11664827-11664828	0.524045	0.844846	-0.320801	0.0981892	-3.26717	0.00108629
chr11	116063862-116063863	0.34035	0.0457034	0.294647	0.0872513	3.37699	0.000732835
chr11	81398586-81398587	0.598472	0.276832	0.32164	0.099745	3.22462	0.00126139
chr11	63564891-63564892	0.941989	0.494034	0.447955	0.161388	2.77564	0.00550925
chr11	107982611-107982612	0.176826	0.488051	-0.311225	0.0976556	-3.18697	0.00143773
chr11	57592932-57592933	0.735967	0.412632	0.323336	0.103512	3.12366	0.00178617
chr11	16759252-16759253	0.398398	0.702992	-0.304594	0.0948635	-3.21087	0.00132335
chr11	28854511-28854512	0.819189	0.506649	0.31254	0.0987723	3.16424	0.00155486
chr11	110401367-110401368	0.92211	0.642076	0.280034	0.0838523	3.33961	0.00083896
chr11	41855246-41855247	0.347528	0.68541	-0.337882	0.111824	-3.02155	0.0025148
chr11	121420610-121420611	0.536458	0.21227	0.324188	0.105581	3.0705	0.00213702
chr11	64588670-64588671	0.426127	0.750213	-0.324086	0.106286	-3.04918	0.00229468
chr11	113932078-113932079	0.557025	0.873357	-0.316332	0.103128	-3.06738	0.00215945
chr11	63509586-63509587	0.965276	0.528826	0.43645	0.162909	2.67911	0.00738184
chr11	120481605-120481606	0.402394	0.118809	0.283585	0.0898448	3.15638	0.0015974
chr11	64277992-64277993	0.614275	0.887607	-0.273331	0.0853195	-3.20362	0.00135711
chr11	8609248-8609249	0.655555	0.923599	-0.268044	0.0833448	-3.21609	0.0012995
chr11	69404222-69404223	0.743683	0.995803	-0.25212	0.075691	-3.33091	0.000865623
chr11	109991507-109991508	0.55124	0.263246	0.287994	0.0951345	3.02723	0.00246802
chr11	101585916-101585917	0.335226	0.628796	-0.29357	0.0979999	-2.99562	0.00273888
chr11	66226344-66226345	0.648331	0.911732	-0.263401	0.082897	-3.17745	0.00148577
chr11	98750319-98750320	0.649849	0.927821	-0.277971	0.0906627	-3.06599	0.00216948
chr11	51085046-51085047	0.700635	0.390856	0.309779	0.107165	2.89067	0.00384418
chr11	63539302-63539303	0.942333	0.517437	0.424896	0.1671	2.54277	0.0109977
chr11	112859766-112859767	0.962323	0.713824	0.248499	0.0759614	3.27139	0.00107019
chr11	117141792-117141793	0.936454	0.655923	0.280531	0.0924645	3.03393	0.00241389
chr11	28914273-28914274	0.82711	0.552047	0.275063	0.0898788	3.06038	0.00221058
chr11	64611925-64611926	0.87561	0.586124	0.289486	0.0973995	2.97215	0.00295722
chr11	52526584-52526585	0.687278	0.948367	-0.261089	0.0836202	-3.12231	0.00179435
chr11	114072102-114072103	0.552044	0.256248	0.295796	0.101913	2.90244	0.00370262
chr11	112191441-112191442	0.939089	0.683078	0.256012	0.081887	3.12641	0.00176957
chr11	22410187-22410188	0.506309	0.229064	0.277244	0.09308	2.97856	0.00289607
chr11	95618118-95618119	0.0180308	0.299649	-0.281619	0.096624	-2.91458	0.00356163
chr11	98033609-98033610	0.564807	0.259586	0.30522	0.10926	2.79352	0.00521372
chr11	106950984-106950985	0.551073	0.845882	-0.294808	0.103724	-2.84225	0.0044797
chr11	112991411-112991412	0.957225	0.70824	0.248984	0.0799892	3.11272	0.0018537
chr11	41780665-41780666	0.406602	0.708637	-0.302035	0.110116	-2.74287	0.00609048
chr11	63980016-63980017	0.686302	0.925761	-0.239459	0.0764781	-3.13109	0.00174162
chr11	75570905-75570906	0.386779	0.101472	0.285307	0.101942	2.79873	0.00513048
chr11	64513943-64513944	0.769651	0.495869	0.273782	0.0975595	2.80631	0.00501132
chr11	77781784-77781785	0.562454	0.839545	-0.277091	0.100204	-2.76527	0.00568765
chr11	55165853-55165854	0.673176	0.931694	-0.258518	0.089811	-2.87847	0.0039961
chr11	72143711-72143712	0.781319	0.507717	0.273601	0.0984812	2.77821	0.00546591
chr11	48854384-48854385	0.429909	0.166183	0.263727	0.0935471	2.81918	0.00481458
chr11	43647033-43647034	0.120389	0.368667	-0.248278	0.0847042	-2.93112	0.00337744
chr11	80436358-80436359	0.395325	0.677014	-0.281689	0.104413	-2.69782	0.0069795
chr11	39800498-39800499	0.797534	0.535119	0.262415	0.0934722	2.80741	0.00499414
chr11	119431158-119431159	0.708623	0.946315	-0.237692	0.0795998	-2.98608	0.00282575
chr11	101526879-101526880	0.537074	0.805302	-0.268228	0.097306	-2.75654	0.00584164
chr11	106659783-106659784	0.690551	0.403983	0.286568	0.108254	2.64717	0.0081169
chr11	73749251-73749252	0.806821	0.52815	0.278671	0.103812	2.68439	0.00726631
chr11	111997407-111997408	0.645225	0.889375	-0.24415	0.0837179	-2.91634	0.00354165
chr11	101806996-101806997	0.626733	0.894684	-0.267951	0.0977516	-2.74114	0.00612255
chr11	97368410-97368411	0.92214	0.674561	0.247578	0.0860863	2.87593	0.00402836
chr11	46971033-46971034	0.92615	0.645393	0.280758	0.105528	2.6605	0.00780247
chr11	46068643-46068644	0.628928	0.906847	-0.277919	0.103912	-2.67456	0.00748274
chr11	41829208-41829209	0.452661	0.735689	-0.283028	0.106939	-2.64663	0.00812972
chr11	116995802-116995803	0.873143	0.613694	0.259449	0.0933912	2.77809	0.00546797
chr11	61008338-61008339	0.88539	0.617996	0.267394	0.0982635	2.72119	0.00650474
chr11	59617688-59617689	0.459509	0.736421	-0.276912	0.103986	-2.66298	0.00774513
chr11	16878598-16878599	0.440395	0.696633	-0.256237	0.0918646	-2.78929	0.00528233
chr11	64592323-64592324	0.490807	0.778787	-0.28798	0.110669	-2.60217	0.00926368
chr11	42694127-42694128	0.648298	0.352455	0.295843	0.115537	2.56059	0.0104495
chr11	120194725-120194726	0.965951	0.725584	0.240367	0.082764	2.90424	0.00368147
chr11	102992183-102992184	0.271492	0.583165	-0.311672	0.125636	-2.48076	0.0131104
chr11	78481072-78481073	0.786976	0.522302	0.264674	0.0975799	2.71239	0.00668003
chr11	28010485-28010486	0.3857	0.649383	-0.263683	0.0970975	-2.71565	0.0066145
chr11	120184077-120184078	0.965647	0.732119	0.233527	0.0791754	2.94949	0.00318295
chr11	59987947-59987948	0.456702	0.720375	-0.263672	0.0971222	-2.71485	0.00663058
chr11	22630399-22630400	0.707266	0.945822	-0.238556	0.0821983	-2.90221	0.00370546
chr11	117453638-117453639	0.741592	0.97579	-0.234198	0.0806141	-2.90518	0.00367047
chr11	56409098-56409099	0.897437	0.657986	0.23945	0.0841317	2.84614	0.00442533
chr11	85391332-85391333	0.324907	0.610889	-0.285982	0.112969	-2.53151	0.0113573
chr11	95881462-95881463	0.738641	0.96986	-0.231219	0.0797611	-2.8989	0.00374479
chr12	37249583-37249584	0.189078	0.989482	-0.800405	0.0685521	-11.6759	1.69338e-31
chr12	81242524-81242525	0.519122	0.937833	-0.418711	0.0828959	-5.05105	4.39395e-07
chr12	81251951-81251952	0.386135	0.795754	-0.409619	0.0940176	-4.35683	1.31958e-05
chr12	73890183-73890184	0.656055	0.22162	0.434435	0.107443	4.04339	5.26839e-05
chr12	71724723-71724724	0.402372	0.795132	-0.39276	0.0966096	-4.06544	4.79429e-05
chr12	81263461-81263462	0.57901	0.9454	-0.36639	0.0910532	-4.02391	5.7239e-05
chr12	73867053-73867054	0.320625	0.723418	-0.402793	0.104385	-3.85872	0.000113983
chr12	72269556-72269557	0.51864	0.874625	-0.355985	0.0901589	-3.94842	7.86687e-05
chr12	17261030-17261031	0.487836	0.873163	-0.385327	0.100888	-3.81937	0.000133793
chr12	70718590-70718591	0.0894832	0.509879	-0.420396	0.113327	-3.70957	0.000207615
chr12	20664750-20664751	0.654044	0.282289	0.371755	0.0974813	3.8136	0.000136955
chr12	63083910-63083911	0.604579	0.935948	-0.331369	0.0847019	-3.91218	9.14671e-05
chr12	73867054-73867055	0.304877	0.69478	-0.389903	0.106185	-3.67192	0.000240738
chr12	49877345-49877346	0.871259	0.568998	0.302261	0.0827986	3.65056	0.000261674
chr12	7970599-7970600	0.544742	0.887531	-0.342789	0.0994079	-3.44831	0.000564111
chr12	73867055-73867056	0.282645	0.643969	-0.361324	0.1091	-3.31187	0.000926732
chr12	73868327-73868328	0.441097	0.847745	-0.406648	0.132024	-3.08011	0.00206924
chr12	64620217-64620218	0.956674	0.641376	0.315298	0.0959349	3.28658	0.00101411
chr12	79908661-79908662	0.987435	0.512756	0.474679	0.168142	2.82308	0.00475651
chr12	69717344-69717345	0.659572	0.930078	-0.270505	0.076252	-3.54752	0.000388876
chr12	5513291-5513292	0.183483	0.595061	-0.411578	0.145061	-2.83728	0.00454993
chr12	5371675-5371676	0.129571	0.550773	-0.421201	0.150455	-2.79952	0.00511786
chr12	71883278-71883279	0.735691	0.421688	0.314002	0.10102	3.10833	0.00188151
chr12	111514292-111514293	0.636458	0.320793	0.315665	0.103105	3.0616	0.0022016
chr12	25582426-25582427	0.267454	0.627265	-0.359811	0.125695	-2.86258	0.00420212
chr12	101991702-101991703	0.63306	0.906719	-0.273659	0.0843232	-3.24536	0.00117303
chr12	73054449-73054450	0.72734	0.417155	0.310185	0.102598	3.02331	0.00250022
chr12	76289880-76289881	0.54148	0.842092	-0.300612	0.0981954	-3.06137	0.00220328
chr12	40562166-40562167	0.293608	0.604298	-0.31069	0.105724	-2.9387	0.00329589
chr12	6867931-6867932	0.934207	0.63565	0.298557	0.100346	2.97528	0.00292724
chr12	117025472-117025473	0.798301	0.49829	0.300011	0.101572	2.95366	0.00314029
chr12	79614041-79614042	0.255576	0.547287	-0.291711	0.097402	-2.99492	0.00274515
chr12	104366651-104366652	0.507836	0.801789	-0.293953	0.0987542	-2.97661	0.0029145
chr12	43744380-43744381	0.667018	0.387164	0.279854	0.0915667	3.05629	0.00224096
chr12	5322673-5322674	0.752215	0.981034	-0.228819	0.0659013	-3.47214	0.000516317
chr12	17261340-17261341	0.404284	0.706988	-0.302704	0.104043	-2.9094	0.00362122
chr12	117471425-117471426	0.946495	0.677535	0.26896	0.086956	3.09306	0.00198103
chr12	86268387-86268388	0.725025	0.365842	0.359183	0.135793	2.64507	0.0081675
chr12	77092684-77092685	0.417414	0.708091	-0.290677	0.099671	-2.91637	0.00354131
chr12	18055092-18055093	0.786374	0.494691	0.291683	0.100229	2.91017	0.00361231
chr12	83812384-83812385	0.419056	0.726979	-0.307923	0.108826	-2.8295	0.00466205
chr12	76274525-76274526	0.489629	0.772149	-0.28252	0.095558	-2.95653	0.0031112
[truncated: 682 more rows]

## Sheet: C++ vs C+ DMRs
chr	start	end	length	nCG	C+/+ methylation	C+ methylation	methylation difference	areaStat
[truncated: 697 more rows]

[truncated: 3 more sheets: C++ vs C+ DMCs, C+- vs C- DMRs, C+- vs C- DMCs]
